# Supplementary material for: Asprosin-neutralizing antibodies as a treatment for metabolic syndrome
Source: eLife. 2021 Apr 27;10:e63784. doi: 10.7554/eLife.63784 (PMC8102062; doi:10.7554/eLife.63784)
Supplement: Figure 1—source data 1. [file elife-63784-fig1-data1.xlsx]

## Sheet: Sheet1
	Figure 1: DIO single day experiment
	Body weight change					Blood glucose															Statisitical analysis
		Baseline BW (g)	24 post injection (g)	BW change		Time (h)	IgG control					mouse mAb									Figure 1:DIO single day experiment
	IgG control					0	229	168	170	206		207	172	178	208						Food intake			Body weight change			Fasting glucose Two way ANOVA								Plasma insulin
	1	35.7	35.7	0		2	171	164	130	160		144	149	135	117						Column B	mouse mAb		Column B	mouse mAb		Source of Variation	% of total variation	P value	P value summary	Significant?	Geisser-Greenhouse's epsilon			Unpaired t test
	2	42.1	41.9	-0.2		4	149	148	168	137		126	107	86	103						vs.	vs.		vs.	vs.		time x mab	6.934	0.046	*	Yes				P value	0.0788
	3	41.1	41.3	0.2		6	160	152	153	128		106	94	94	112						Column A	IgG control		Column A	IgG control		time	58.21	<0.0001	****	Yes	0.7539			P value summary	ns
	4	41.3	41.4	0.1																							mab	16.26	0.0064	**	Yes				Significantly different (P < 0.05)?	No
	5	54.9	54.2	-0.7		Insulin			Food intake (g)												Unpaired t test			Unpaired t test			Subject	5.814	0.2814	ns	No				One- or two-tailed P value?	One-tailed
						IgG control	mouse mAb		IgG control	mouse mAb											P value	0.0053		P value	0.0284										t, df	t=1.527, df=10
						1.138	1.727		2.5	2.1											P value summary	**		P value summary	*
	mouse mAb					1.727	0.668		2.8	2.1											Significantly different (P < 0.05)?	Yes		Significantly different (P < 0.05)?	Yes
	1	37.5	37.2	-0.3		1.604	1.296		2.9	2.3											One- or two-tailed P value?	Two-tailed		One- or two-tailed P value?	Two-tailed
	2	50.9	50.4	-0.5		1.586	0.567		3.1	0.9											t, df	t=3.793, df=8		t, df	t=2.668, df=8
	3	48.1	47.3	-0.8		1.124	1.622		2.83	1.4
	4	52.4	51.1	-1.3		2.275	1.176
	5	47.4	46.6	-0.8
																					Figure 1-figure supplement 1 (Human obese and lean subject data)
																					BMI			Plasma Glucose				Plasma Insulin			Plasma Asprosin
																					obese vs. normal weight			obese vs. normal weight				obese vs. normal weight			obese vs. normal weight
																					Unpaired t test			Unpaired t test				Unpaired t test			Unpaired t test
																					P value	<0.0001		P value	0.0061			P value	0.0438		P value	0.0143
																					P value summary	****		P value summary	**			P value summary	*		P value summary	*
	Figure 1-figure supplement 1 (Human obese and lean subject data)																				Significantly different (P < 0.05)?	Yes		Significantly different (P < 0.05)?	Yes			Significantly different (P < 0.05)?	Yes		Significantly different (P < 0.05)?	Yes
	BMI (Kg/m2)			Asprosin (ng/mL)				Insulin (mIU/L)			Glucose (mg/dL)										t, df	t=7.708, df=18		t, df	t=2.788, df=18			t, df	t=1.806, df=18		t, df	t=2.712, df=18
	normal weight	obese		normal weight	obese			normal weight	obese		normal weight	obese
	18.6	57.2		0.384	2.368			7.884	56.837		76.0151	80.4345
	19.8	42.5		0.48	0.96			22.183	24.062		49.4982	80.4345
	20.4	41.6		1.024	2.72			9.251	10.44		76.0151	62.7566
	21.6	37.6		0.608	1.184			10.905	11.682		58.3371	80.4345
	22	36.7		0.672	0.8			9.265	9.735		71.5956	98.1124									Figure 1-figure supplement 2: Glucosuria										Figure 1-figure supplement 3: Lean Wild type mice experiment
	22.1	36.6		0.768	0.448			9.642	14.275		76.0151	67.1761									Two way ANOVA (repeated measures)										Blood glucose				Plasma Insulin				Body weight change				Food intake
	22.3	35.5		0.992	1.728			10.58	75.283		53.9177	133.468									Table Analyzed	*Glycosuria										Multiple T -test			Unpaired t test				Unpaired t test				Unpaired t test
	22.3	34.2		0.704	0.544			11.041	10.594		76.0151	93.693									Mixed-effects model (REML)	Matching: Stacked									Time point	P value			P value	0.9184			P value	0.1959			P value	0.3141
	22.4	34		0.64	4			8.708	10.22		71.5956	87.0637									Assume sphericity?	No									0	0.835053			P value summary	ns			P value summary	ns			P value summary	ns
	23	34		0.352	1.664			7.742	17.482		75.1312	131.259									Alpha	0.05									2	0.199574			Significantly different (P < 0.05)?	No			Significantly different (P < 0.05)?	No			Significantly different (P < 0.05)?	No
																					Fixed effects (type III)	P value	P value summary	Statistically significant (P < 0.05)?							4	0.034615			One- or two-tailed P value?	Two-tailed			One- or two-tailed P value?	Two-tailed			One- or two-tailed P value?	Two-tailed
																					Time	0.0003	***	Yes							6	0.248075			t, df	t=0.1058, df=8			t, df	t=1.411, df=8			t, df	t=1.074, df=8
																					antibody treatment	0.7444	ns	No							24	0.203518
																					Time x antibody treatment	0.2245	ns	No
	Figure 1-figure supplement 2: Glucosuria
	Time (h)	IgG control								mouse mAb
	0	26.0804	35.938	32.4879	31.995	46.2885	47.7672	42.8384		45.7957	54.1746	39.3882	41.3597	38.4025	37.9096	41.8526	35.938
	2	19.673	38.4025	21.6445	32.4879	42.8384	17.7015	33.4736		36.4309	35.938	36.4309	22.6303	30.0235	35.938	32.9808					Figure 1-figure supplement 4 : NPS (Neonatal Progeroid Syndrome) mice experiment
	4	19.1801	38.8953	10.8011	25.0947	38.8953				36.9238	31.0092	22.1374	36.9238	25.0947	38.8953	24.1089	28.052				Blood glucose						Body weight			Food intake
	6	12.2798	44.317	18.1943	25.0947	34.9523	32.4879	40.374		31.5021	12.2798	6.85808	23.1231	28.052	34.9523	34.4594						Multiple T -test					Multiple T -test			Unpaired t test
																					Time point	Discovery?	P value				Discovery?	P value		P value	0.3148
																					0	No	0.397512			pre-treatment	No	0.696031		P value summary	ns
																					2	No	0.834531			post-treatment	No	0.912968		Significantly different (P < 0.05)?	No
		Figure 1-figure supplement 3: Lean Wild type mice experiment																			4	No	0.172369							One- or two-tailed P value?	Two-tailed
		Before treatment	after treatment									Fasting Glucose (mg/dL)									6	No	0.620199							t, df	t=1.073, df=8
	IgG control	Body weight (g)	Body weight (g)	Body weight change		IgG control	24h Food intake (g)		IgG control	Insulin (ng/mL)		Time point (min)			IgG control
	1	26.1	26.4	0.3		1	3.8		1	1.19484		0	197	164	214	170	180				Figure 1-figure supplement 5 :Sickness and side effects analysis
	2	28	27.8	-0.2		2	3.9		2	1.21596		2	158	140	200	180	183				Pedestrian activity							Wheel running activity								plasma IL1b				plasma TNF alpha			plasma TGF beta			plasma IL10
	3	31.2	31.1	-0.1		3	3.9		3	1.70031		4	152	147	210	180	186				Two way ANOVA (repeated measures)							Two way ANOVA (repeated measures)								anti-asprosin mAb vs. IgG control
	4	27.7	27.5	-0.2		4	3.8		4	1.06196		6	164	150	158	184	164				Source of Variation	% of total variation	P value	P value summary	Significant?			Fixed effects (type III)	P value	P value summary	Statistically significant (P < 0.05)?					Unpaired t test				Unpaired t test			Unpaired t test			Unpaired t test
	5	28.8	28.3	-0.5		5	3.8		5	2.77623											Time x mAb treatment	13.93	<0.0001	****	Yes			Time	0.0008	***	Yes					P value	0.1323			P value	0.3496		P value	0.9879		P value	0.4212
																					Time	15.82	0.1056	ns	No			mAb treatment	0.2267	ns	No					P value summary	ns			P value summary	ns		P value summary	ns		P value summary	ns
	mouse mAb					mouse mAb			mouse mAb					mouse mAb							mAb treatment	0.03271	0.829	ns	No			Time x mAb treatment	0.6153	ns	No					Significantly different (P < 0.05)?	No			Significantly different (P < 0.05)?	No		Significantly different (P < 0.05)?	No		Significantly different (P < 0.05)?	No
	1	29.7	29.4	-0.3		1	3.7		1	2.40664		0	171	200	187	170	210				Subject	5.253	<0.0001	****	Yes											One- or two-tailed P value?	Two-tailed			One- or two-tailed P value?	Two-tailed		One- or two-tailed P value?	Two-tailed		One- or two-tailed P value?	Two-tailed
	2	28.2	27.9	-0.3		2	3.6		2	1.09305		2	174	190	188	182	217																			t, df	t=1.606, df=13			t, df	t=0.9703, df=13		t, df	t=0.01538, df=14		t, df	t=0.8306, df=13
	3	29.5	29.5	0		3	4		3	1.35768		4	158	146	132	136	126
	4	28.9	27.9	-1		4	3.8		4	1.74058		6	151	171	135	168	135
	5	32.7	32.1	-0.6		5	3.7		5	1.14058											plasma Creatinine				plasmaBUN				plasma ALT			plasma AST
																					Unpaired t test				Unpaired t test				Unpaired t test			Unpaired t test
																					P value	0.9427			P value	0.6162			P value	0.3573		P value	0.8713
																					P value summary	ns			P value summary	ns			P value summary	ns		P value summary	ns
																					Significantly different (P < 0.05)?	No			Significantly different (P < 0.05)?	No			Significantly different (P < 0.05)?	No		Significantly different (P < 0.05)?	No
	Figure 1-figure supplement 4 : NPS (Neonatal Progeroid Syndrome) mice experiment																				One- or two-tailed P value?	Two-tailed			One- or two-tailed P value?	Two-tailed			One- or two-tailed P value?	Two-tailed		One- or two-tailed P value?	Two-tailed
		Fasting glucose																			t, df	t=0.07422, df=8			t, df	t=0.5214, df=8			t, df	t=0.9543, df=13		t, df	t=0.1649, df=14
		Time point (min)
			IgG control					mouse mAb
		0	115	205	141	154	123	154	140	140	182	221
		2	189	166	130	200	112	169	182	61	220	200
		4	185	162	153	154	112	146	90		123	146
		6	175	168	123	171	89	169	86		152	122
		Body weight change
			IgG control					mouse mAb
		pre-treatment	24.3	26	22.975	22.4	19.2	25.3	22.4	22.325	23.3	18.3
		post-treatment	24.1	25.4	22.925	22.2	20	25.6	22.8	22.75	24.4	18.2
		food intake (g)
			IgG control	Mouse mAb
			3.2	4.3
			3.3	2.6
			1.9	4.8
			4.1	3.4
			3.5	3.7
	Figure 1-figure supplement 5 :Sickness and side effects analysis
		Half hourly wheel running activity											Half hourly pedestrian activity
		Time post treatment (min)	IgG Control						Mouse mAb					Time post treatment (min)	IgG Control
		-9	206.46	256.31	0	0	253.611		128.033	124.855	186.379	134.174		-9	0.9973	2.8065	0	0.0475	0.2351
		-8.5	318	294.4	0.36	0	209.267		218.743	165.237	245.616	28.174		-8.5	1.0674	3.5719	0.5439	0.3208	2.7714
		-8	319.66	265.39	0	0	259.654		157.483	80.908	118.474	0		-8	1.7191	6.9178	0.0201	0.1864	2.2187
		-7.5	286.07	240.78	0	1.806	207.246		106.915	0	1.445	0		-7.5	1.2388	5.5251	0.7707	1.8319	0.6266
		-7	262.91	225.12	58.88	0	139.222		0	0	0	0		-7	1.4312	12.9023	2.7071	3.2849	2.0518
		-6.5	199.43	238.15	232.61	0	263.15		113.898	3.613	0	19.504		-6.5	3.749	6.759	4.468	2.4552	1.8067
		-6	70.43	260.23	182.41	2.324	0		224.113	169.402	94.297	143.324		-6	0.6625	6.4388	2.93	1.9857	2.982
		-5.5	0	200.4	134.73	30.184	0		192.231	0	20.565	122.881		-5.5	0.0425	10.3416	5.5684	5.8723	3.2704
		-5	0	110.79	60.32	52.543	3.09		146.165	0	0	193.963		-5	0	17.8188	3.942	2.2818	2.9523
		-4.5	0	149.17	0	85.436	137.06		178.313	0	0	219.92		-4.5	0.01	2.696	0	3.7622	2.2493
		-4	58.52	0	0	129.875	187.92		43.585	0.723	0	220.34		-4	1.2375	0.0722	0	5.9192	2.5162
		-3.5	286.43	0	0	61.621	230.41		0	118.81	0	199.38		-3.5	2.2032	0.1227	0	3.3328	3.3983
		-3	229.46	0	0	125.625	214.44		0	144.673	105.47	146.69		-3	2.0201	0.0852	0	2.4074	2.3851
		-2.5	224.47	0.7	50.2	164.623	177.76		0	42.573	180.239	129.58		-2.5	2.19	1.1228	2.0334	0.1537	3.3928
		-2	176.03	104.77	96.81	96.898	227.56		27.812	37.445	23.164	124.35		-2	5.7849	12.3169	6.7404	0	2.4277
		-1.5	84.49	10.12	84.35	0	187.46		124.253	0	32.821	49.84		-1.5	1.4534	0.1475	13.561	0.02	3.7967
		-1	0	0	13.89	0	147.42		11.558	0	0	0		-1	0	0.1575	8.8962	0.7392	1.9328
		-0.5	0	0	0	0	98.2		0	0	2.167	0		-0.5	0	0	0.065	0.0567	2.4975
	antibody injection	0	0	0	0	0	0		0	21.311	5.418	0		0	0	1.2731	0	0.1325	2.1803
		0.5	6.86	0	0	0	0		0	0	3.251	1.45		0.5	0.728	0	0	1.0039	0.0611
		1	56.35	26.37	32.51	0	0.64		91.384	18.421	52.013	33.59		1	1.9559	3.5958	9.5977	1.2142	0.0072
		1.5	3.98	0	38.29	83.799	246.06		178.36	28.174	6.863	39.01		1.5	0.0486	0	1.8922	1.2209	0.6949
		2	0	0	0	0	0		72.312	43.344	0	51.29		2	0.0371	0	0	5.8099	8.1831
		2.5	0	0.72	0	0	0		0	0	2.89	226.47		2.5	0	0.5095	0	3.1983	5.6664
		3	0	50.21	0	0	0		0	0	0	20.59		3	0.1349	9.5717	0	8.8187	4.2792
		3.5	0	0	11.19	0	0		0	3.612	0	0		3.5	0.015	0	1.2697	3.8786	4.4742
		4	0	0	0	10.836	0		0	0	0	0		4	0	0	0	5.8617	5.6915
		4.5	1.44	0	0	0	0		0	0	0	0		4.5	0.7057	0	0	2.7753	2.8346
		5	6.86	0	25.65	0	0		0	0	0.723	0		5	8.0125	0	1.6521	0	2.9301
		5.5	0	0	0	0	0		0	22.033	0	0		5.5	0.1339	0.2153	0	0	4.2322
		6	0	0	0	0	61.16		52.374	0	0	0		6	0.01	0	0	0	3.3546
		6.5	0	0	5.13	0	210.1		27.09	0	0	0		6.5	0.0464	0	1.5021	0.1488	0.0175
		7	0	0	79.03	0	0		0	0	70.795	93.91		7	0.025	0	2.758	0.035	0
		7.5	0	0	0	1.444	0		0	0	0	251.06		7.5	0.0858	0.015	0	0.7184	0.0141
		8	0	0	0	0	0		0.723	0	0.722	53.79		8	0	0	0	3.508	2.6254
		8.5	0	0	0.36	0	0		0	16.254	0	0		8.5	0	0.399	0.6115	0	0.5117
		9	0	0	0	0	0		0	0	11.919	0		9	0.3792	0	0.3436	0	0
		9.5	0	0	18.78	0	0		1.444	0	0	0		9.5	0	0.2561	2.0495	0	0
		10	76.07	21.31	167.79	35.037	4.69		0	13.726	9.464	151.71		10	0.5008	1.68	3.0709	0	0
		10.5	319.9	341.28	226.04	51.651	234.17		8.669	98.968	17.626	285.71		10.5	0.2373	1.9292	3.7983	1.8655	0.6243
		11	395.59	331.29	253.06	0	265.48		244.533	238.392	216.383	243.45		11	0.7787	1.492	3.3574	0	0
		11.5	400.62	415.12	197.96	0	284.16		223.703	135.57	295.606	260.04		11.5	0.3351	1.1565	3.1806	0.0125	0.0127
		12	404.23	368.47	182.57	99.102	253.63		209.376	253.592	312.342	246.6		12	0.5196	1.4519	2.7445	0	0
		12.5	426.46	376.73	224.14	151.644	265.33		89.578	246.04	335.627	155.08		12.5	1.4847	2.6312	3.7769	0.2639	2.0005
		13	502.62	261.99	208.63	148.224	231.97		35.758	246.49	348.39	234.05		13	0.7367	3.0895	3.3526	0	0.9315
		13.5	370.25	426.29	134.49	156.869	243.01		87.049	199.38	325.925	160.38		13.5	0.4654	2.3483	3.5243	0	0.01
		14	525.62	364.5	151.84	125.746	224.47		220.332	185.3	260.71	146.64		14	0.5091	2.6228	3.3039	0.343	0.0214
		14.5	469.75	318.53	16.5	0	252.33		89.578	195.57	289.3	236.95		14.5	0.5706	2.0692	0.2508	0.0195	0
		15	400.7	363.37	0	0	251.63		196.854	127.12	232.61	159.29		15	0.7756	3.544	0.0177	0.0168	0.01
		15.5	457.39	386.87	0	0	257.4		124.976	165.29	273.16	152.47		15.5	0.968	1.8814	0.8643	0.0782	0.1091
		16	495.43	341.5	0	0	118.8		72.961	41.53	257.08	42.22		16	0.7858	5.1557	0.3357	0	0.0142
		16.5	422.94	316.58	1.08	123.169	0		0	0	99.33	0		16.5	0.5062	5.9859	1.8886	6.3404	1.153
		17	407.1	355.85	143.3	134.727	0		0	0	0.73	0		17	0.9313	3.6098	3.0277	4.9113	3.5378
		17.5	321.49	316.68	208.85	9.392	120.59		79.826	13.36	0	13.36		17.5	1.3205	5.3312	4.9348	0.4806	2.2378
		18	249.56	270.59	166.54	0	298.62		195.942	195.942	0	195.942		18	2.7835	10.4826	2.5756	0.4605	1.9402
		18.5	3.97	157.36	208.05	0	135.95		228.3	0	0	228.3		18.5	1.4639	13.5978	4.8089	3.3477	1.4521
		19	0	241.4	123.53	0.361	0		44.96	76.94	2.89	44.96		19	0	3.2794	3.3999	4.7816	5.3954
		19.5	0	126.76	199.02	30.184	0		70.79	204.44	238.03	70.79		19.5	0	8.2947	2.1654	5.896	1.2839
		20	56.21	39.01	78.38	132.717	0		0.72	105.83	75.13	191.07		20	0.3142	11.6005	9.9635	3.197	1.8105
		20.5	331	0.72	76.94	65.377	202.9		0	98.63	4.33	183.83		20.5	1.0326	0.0838	5.0014	2.3762	2.3645
		21	311.09	0	48.76	107.012	272.83		0	54.76	0	195.43		21	0.923	0.0125	13.7247	0	2.5928
		21.5	111.97	0	0	81.715	236.56		0	63.33	0	177.11		21.5	3.5254	0	0.0528	0.1931	2.285
		22	103.21	0.36	0	38.107	268.28		22.04	22.03	2.89	119.18		22	3.424	1.227	0	0.2871	1.7542
		22.5	0	0	0	176.265	224.88		15.17	0	1.44	89.84		22.5	0.0993	0	0	0.1021	1.6799
		23	0	0	0	0	235.95		0.36	0	0	97.88		23	0.0921	0.5265	0	1.6008	0
		23.5	0	7.23	57.07	0	73.12		0	0	0	85.97		23.5	0.0201	2.1897	6.2589	4.8834	0
		24	0	0	139.06	0	44.78		0	3.25	0	0		24	0	0	5.2602	0.5195	4.5064
		24.5	0	0	0	0	0		0	0	0	0		24.5	0	0	0	0.1958	1.2759
		25	0	204.8	0	0	0		1.08	0	0	0		25	0	4.1544	0	0.0316	0.9515
		25.5	1.44	41.17	0	0	0		0	64.3	0	0		25.5	2.8202	0.1372	0	0.3174	0
		26	0	0	0	0	0		0	43.7	4.7	0		26	0.025	0.0608	0.0175	0.8758	0.0237
		26.5	0	0	5.78	0	8.67		0	0	0	0		26.5	0	0.5438	2.2958	3.2496	1.2035
		27	0	0	0	0	0		2.89	0	0	0		27	0	0.0103	0	2.114	6.2138
		27.5	0	0	0	0	0		0	0	0	0		27.5	0	0	0	2.9555	2.4771
		28	1.45	0	0.36	0	106.92		0	10.48	0	0		28	2.8044	0.2038	0.4032	9.2029	0.9556
		28.5	0	0	0	0	0		0	0	0	0		28.5	0	0	0	8.4626	2.0623
		29	0	0	0	0	0		0.36	0	0	0		29	0	0	0	3.3378	2.8726
		29.5	0	0	0	0	0		0	0	0	2.17		29.5	0.1751	0	0.4678	0	3.0635
		30	0	0.73	275.26	0	72.96		0	9.03	0	0		30	0	0.4367	1.9244	0	4.291
		30.5	0	24.56	33.57	8.669	0		0.73	0	204.44	0		30.5	0.0335	0.2588	0.3834	0.0325	3.2167
		31	0	0	0	1.084	0		0	0	16.25	0		31	0	0.0175	0	0.3093	0.0279
		31.5	0	0	0	0	0		0	0	23.12	0.72		31.5	0.0992	0.2091	0.01	0	0
		32	0	0	0.36	0	0		0	0	8.31	159.14		32	0	0.1538	0.508	0	0
		32.5	0	0	0	0	5.42		0.72	4.69	0.72	265.27		32.5	0	0.1238	0	0.1083	0.0112
		33	187.87	0	0	6.501	0		0	0	0	238.75		33	0.7579	0	0.5758	0.0107	5.6148
		33.5	317.09	47.2	195.45	5.057	91.35		0	0	0	218.89		33.5	0.1615	1.7693	2.9828	0.0075	0
		34	0	314.43	297.8	3.251	281.62		20.95	53.65	0.36	254.31		34	0.0805	1.2763	2.8003	0.2228	0
		34.5	0.72	450.49	337.51	0	298.01		90.66	266.31	14.59	275.93		34.5	0.3634	1.377	1.7584	0.1642	3.6469
		35	436.47	488.94	354.43	141.229	374.69		34.31	270.75	330.31	249.95		35	0.3829	1.5966	4.7584	0	0
		35.5	514.66	407.22	295.37	5.093	347.31		191.8	272.75	424.82	225		35.5	0.01	2.9149	3.2361	0.3184	0
		36	415.82	470.38	242.72	253.19	314.41		184.19	201.36	268.27	189.3		36	0.0125	2.1291	3.2858	0.0848	0.02
		36.5	482.18	371.6	240.95	234.418	308.83		97.18	205.52	416.13	174.62		36.5	0.3616	2.0101	3.6509	0.092	1.6523
		37	525.76	465.66	243.49	273.947	252.46		19.15	204.93	369.94	216.1		37	0.2047	0.6792	2.908	2.5442	0
		37.5	502.86	364.16	185.23	152.811	340.01		69.71	181.65	300.74	220.84		37.5	0.4653	3.3103	2.3563	2.1511	0
		38	540.19	502.1	243.45	203.151	350.6		42.98	238.3	383.35	199.69		38	0.3086	2.4416	4.1181	0	0.1197
		38.5	461.71	207.93	35.39	163.78	186.97		139.11	213.11	302.3	212.75		38.5	1.6992	2.8607	2.2029	0.1234	0
		39	522.51	364.76	0	167.751	303.51		77.25	125.07	332.35	18.78		39	0.8578	2.5984	0	0.0103	2.1037
		39.5	550.04	466.19	0	1.13	286.99		170.49	68.89	339.87	0		39.5	0.7217	4.6978	0.0125	3.2603	0
		40	482.7	554.39	1.81	0	237.93		223.22	0	328.71	61.41		40	1.4103	1.9901	0.9092	0.4429	3.0735
		40.5	518.74	341.67	34.19	0	299.35		151.34	0	173.74	54.18		40.5	0.6018	4.8804	1.2289	0.6014	4.1102
		41	489.01	369.54	253.83	0	218.2		76.94	0	182.41	0		41	1.2594	6.175	3.833	0.0789	3.0834
		41.5	346.42	394.33	10.33	49.13	0		2.17	0	1.08	0		41.5	1.1898	7.8561	0.1793	2.7275	1.8603
		42	337.04	407.14	0	0	0		0	0	3.97	0		42	2.0309	6.0502	0	1.1046	1.0621
		42.5	152.79	349.12	96.44	0	0		58.51	0	0	87.41		42.5	2.0713	14.1586	4.2263	2.3297	1.8563
		43	194.33	317.3	104.03	39.68	112.34		69.71	148.82	7.95	241.52		43	0.1169	7.1479	5.8793	2.7122	1.9565
		43.5	4.33	154.52	193.19	155.92	275.81		61.41	227.43	17.34	178.57		43.5	0.065	22.3745	2.2659	2.7768	1.9507
		44	0	248.94	273.21	168.74	288.85		28.53	125.46	28.89	274.81		44	0	12.1316	3.4039	1.7654	1.7404
		44.5	2.89	108.36	299.99	164.09	267.9		11.56	101.86	242.37	307.38		44.5	0	10.1913	2.8934	3.6033	1.6617
		45	0	0.72	160.47	113.05	264.76		0	102.94	239.88	255.39		45	0	3.4657	6.0549	4.53	1.2425
		45.5	0	0	121.36	129.87	229.88		0	104.03	1.76	287.95		45.5	0	0	4.6282	2.1588	1.5564
		46	0	0	299.41	27.26	301.41		0	0	0	224.26		46	0.0325	0.0855	2.354	0.2357	2.1878
		46.5	9.03	0	0	0	265.88		3.61	0	0	204.7		46.5	4.922	0	0	0.1886	0.9845
		47	62.13	0	0	0	183.71		16.98	2.89	0.72	168.05		47	8.131	0.633	0	0.2026	1.7223
		47.5	0	96.78	0	0	39.51		0	14.8	0	262.79		47.5	0.7172	3.7077	0	0.226	1.031
		48	0	160.4	15.9	0	0		1.8	10.12	5.06	46.4		48	0.04	2.8448	1.5345	3.0165	0.0283
		48.5	1.8	0	119.55	0	0		6.5	58.15	0	0		48.5	0.2139	0.01	4.5631	0.2577	0.025
		49	0	0	118.84	0	0.36		0	0	0	0		49	0	0	1.5697	0.4961	0.1732
			Plasma cytokine analysis
			IL1beta	pg/ml		TNF alpha	pg/ml		IL10	pg/ml		TGF beta	pg/ml
			IgG control	anti-asprosin mAb		IgG control	anti-asprosin mAb		IgG control	anti-asprosin mAb		IgG control	anti-asprosin mAb
			1.305	1.95		45.4249	53.369		76.872	827.902		3898.38	1677.72
			0.84	2.235		61.1363	69.5979		32.49	258.488		4111.64	1469.07
			0.555	0.825		40.0086	65.3873		undetectable	385.472		2407.98	2532.06
			0.555	0.54		76.2599	61.1363		663.934	441.296		2381.1	1850.73
			0.555	2.325		37.2575	40.9189		488.348	66.53		2005.73	2117.74
			1.59	1.395		72.9399	40.9189		135.048	584.098		1838.61	2305.24
			0.99	1.545		98.1917	49.8625		638.632	767.91		1115.83	4607.48
			1.951	undetectable		%CV>20%	41.8261		339.221	286.196		3230.09	4360.08
			Markers of hepatic health							Markers of renal health
			Plasma AST (ng/mL)			Plasma ALT(mIU/mL)				plasma Creatinine (mg/dL)			Plasma BUN (mg/dL)
			IgG control	anti-asprosin mAb		IgG control	anti-asprosin mAb			IgG control	anti-asprosin mAb		IgG control	anti-asprosin mAb
			345.624	147.119		230.593	141.685			0.054891	0.159348		18.7405	18.5138
			375.973	480.826		255.357	222.474			0.159348	1.30223		18.0979	19.1939
			300.947	259.267		175.381	87.2843			0.94837	0.241766		19.6197	20.1007
			461.81	205.733		291.895	271.19			0.489022	0.087908		19.4206	18.136
			142.56	304.985		185.936	64.5498			1.16046	0.901114		19.4962	18.2116
			243.636	328.822		153.052	189.184
			132.401	369.721		154.676	196.085
			328.301	305.897		155.488	167.493
