# Supplementary material for: Asprosin-neutralizing antibodies as a treatment for metabolic syndrome
Source: eLife. 2021 Apr 27;10:e63784. doi: 10.7554/eLife.63784 (PMC8102062; doi:10.7554/eLife.63784)
Supplement: Figure 2—source data 1. [file elife-63784-fig2-data1.xlsx]

## Sheet: Sheet1
	Figure 2: Dose response curve													IgG control						mouse mAb										Statistical analysis
		Body weight (0)	Body weight (24)	Body weight change		mouse mAb	Body weight (0)	Body weight (24)	Body weight change				Dose (ug/mouse)	1	2	3	4	5		1	2	3	4	5						Figure 2 Dose response curve
	IgG control											24h food intake (g)	15.63	2	2.5	food spill	2	2.8		food spill	2.4	3	2.5	3.3						plasma insulin					plasma glucose						plasma triglyceride					Body weight change
													31.25	2.4	2.5	3.6	2.4	2.2		2.8	2.1	3.2	2.5	1.7						log(inhibitor) vs. response (three parameters)					log(inhibitor) vs. response (three parameters)						log(inhibitor) vs. response (three parameters)					[Inhibitor] vs. response -- Variable slope (four parameters)
	15.75 ug/mouse					15.75 ug/mouse							62.5	4.3	2	3	2.3	2.3		1.3	1.4	1.4	1.3	food spill						Best-fit values					Best-fit values						Best-fit values					Best-fit values
	1	39.1	38.7	-0.4		1	39.5	39.1	-0.4				125	3.1	2.5	2.4	2	1.8		1	1.4	0.6	1.6	0.5						Bottom	0.9047				Bottom	108					Bottom	33.89				Bottom	-2.418
	2	38.3	37.7	-0.6		2	37.6	37.2	-0.4				250	2.4	2.3	2.5	2.5	3.1		0.2	0.425	0.6	0.4	0.5						Top	2.985				Top	153.4					Top	48.06				Top	-0.4098
	3	37.8	37	-0.8		3	37.4	37.3	-0.1																					LogIC50	30.77				LogIC50	54.01					LogIC50	30.87				IC50	58.19
	4	37	36.7	-0.3		4	38.2	37.1	-1.1			plasma insulin (ng/ml)	15.63	5.66312	2.11494	1.63971	1.02106	1.26968		4.1715	0.707	3.185	7.4435	3.87675						IC50	5.866e+30				IC50	1.028e+54					IC50	7.446e+30				HillSlope	-4.061
	5	40.4	39.7	-0.7		5	42.2	41.8	-0.4				31.25	1.95836	1.82307	2.13913	1.33922	3.40478		1.363	1.1955	1.241	2.301	1.003						Span	2.08				Span	45.4					Span	14.17				logIC50	1.765
													62.5	4.03962	1.04275	2.27085	1.41282	1.19954		0.541	0.703	1.845	1.681	1.89						Goodness of Fit					Goodness of Fit						Goodness of Fit					Goodness of Fit
													125	3.21717	1.32767	1.1713	0.791274	0.891505		0.755	0.2715	0.924	0.488	0.793						Degrees of Freedom	21				Degrees of Freedom	22					Degrees of Freedom	20				Degrees of Freedom	21
	31.25 ug/mouse					31.25 ug/mouse							250	3.21717	1.15951	1.73164	3.05667	1.40595		1.4925	0.2775	0.4545	0.6	0.8545						R squared	0.52				R squared	0.5062					R squared	0.58				R squared	0.8709
	1	39.2	39.2	0		1	38.4	38	-0.4																					Sum of Squares	12.75				Sum of Squares	9250					Sum of Squares	525.2				Sum of Squares	2.646
	2	37.3	37.1	-0.2		2	39	38.2	-0.8																					Sy.x	0.7791				Sy.x	20.5					Sy.x	5.124				Sy.x	0.355
	3	41.9	41.3	-0.6		3	32.2	31.9	-0.3			plasma glucose (mg/dL)	15.63	199	188	143	177	140		154	137	158	167	148
	4	38	37.4	-0.6		4	40.2	39.9	-0.3				31.25	186	161	138	173	148		194	151	136	154	132
	5	43	42.6	-0.4		5	35.7	35.1	-0.6				62.5	143	157	141	180	144		121	98	165	95	84
													125	129	129	163	250	118		110	98	107	116	109
	62.5 ug/mouse					62.5 ug/mouse							250	159	129	183	140	175		130	90	115	112	140
	1	45	44.9	-0.1		1	35.8	33.9	-1.9
	2	39.3	38.82	-0.48		2	34.6	33.5	-1.1
	3	43.4	42.6	-0.8		3	46.3	44.3	-2			plasma triglyceride (mg/dL)	15.63	69.5825	69.963	69.9175	53.4765	54.5265		51.4835	34.9125	48.3505	57.498	48.0611
	4	38.3	38.1	-0.2		4	39	38	-1				31.25	61.6355	52.091	66.37	59.1545	71.1805		42.9405	40.21	39.1405	38.8505	29.2255
	5	39	38.2	-0.8		5	36.4	34.4	-2				62.5	60.357	112.024	79.477	63.9045	69.3085		26.7465	38.4605	37.857	33.2395	31.377
													125	103.651	70.724	59.931	47.22	85.3225		36.9885	30.6975	53.8495	34.8625	32.723
	125 ug/mouse					125 ug/mouse							250	69.1105	70.4955	58.1805	93.284	56.0945		34.598	30.773	34.3465	37.9195	42.387
	1	40	40	0		1	41.1	38.7	-2.4
	2	42	41.8	-0.2		2	33.5	31.4	-2.1
	3	40.6	40.1	-0.5		3	41.3	39.3	-2
	4	35.6	35.5	-0.1		4	36.9	34.8	-2.1
	5	39.4	39	-0.4		5	38.8	36.4	-2.4
	250 ug/mouse					250 ug/mouse
	1	45.3	44.6	-0.7		1	37.4	34.4	-3
	2	35.1	34.5	-0.6		2	30	28	-2
	3	43.7	43.5	-0.2		3	38.7	36	-2.7
	4	43.2	43.2	0		4	40.2	37.8	-2.4
	5	36	35.6	-0.4		5	37.3	34.8	-2.5
