# Supplementary material for: Asprosin-neutralizing antibodies as a treatment for metabolic syndrome
Source: eLife. 2021 Apr 27;10:e63784. doi: 10.7554/eLife.63784 (PMC8102062; doi:10.7554/eLife.63784)
Supplement: Figure 3—source data 1. [file elife-63784-fig3-data1.xlsx]

## Sheet: Sheet1
	Figure 3: Ad5 and AAV experiments																											Statistical analysis
	Body weight change (g)
	Days	Ad-Empty												Ad-hFBN1														Figure 3 (Ad5- and AAV experiments)
	0	0	0	0	0	0	0	0	0	0	0	0	0	0	0	0	0	0	0	0	0	0	0	0	0
	3	0	-3.6	0.5	-1.8	-1.9	-0.4	-0.7	-1.5	-1.9	-2.4	-1.9	-0.7	-0.7	-1	-1.2	-1.8	-0.7	-1.2	0	-1.4	-1.5	0	-1	-1			AD5-hFBN1 experiment
	9	0.9	-2.7	1.7	0.2	-0.7	-0.7	-0.3	-1	-1.3	-0.5	-0.2	0.7	1.3	1.1	-0.3	-0.1	1.4	0.4	0.5	0.9	0.5	1.2	0.1	0.1			Body weight							Food intake								Body weight change
	15	1.5	-1.4	0.5	-0.3	-0.5	0.6	0.5	-0.7	-0.8	0.1	-0.3	1.6	2	0.7	-0.2	2.3	2.6	0.4	0.8	1.4	0.7	1.3	0.8	0.9			Fixed effects (type III)	P value	P value summary	Statistically significant (P < 0.05)?				Dunnett's multiple comparisons test	Mean Diff.	95.00% CI of diff.	Below threshold?	Summary	Adjusted P Value			Dunnett's multiple comparisons test	Mean Diff.	95.00% CI of diff.	Below threshold?	Summary	Adjusted P Value
																												Time	<0.0001	****	Yes				Ad-hFBN1+ IgG vs. Ad-Empty+ IgG	2.417	0.9514 to 3.882	Yes	**	0.0021			Ad-hFBN1+ IgG vs. Ad-Empty+ IgG	0.01667	-0.2761 to 0.3095	No	ns	0.986
																												ad5-fbn1	0.0251	*	Yes				Ad-hFBN1+ IgG vs. Ad-hFBN1+mAb	2.397	0.9314 to 3.862	Yes	**	0.0022			Ad-hFBN1+ IgG vs. Ad-hFBN1+mAb	0.5167	0.2239 to 0.8095	Yes	**	0.0012
	Body weight change (g)																											Time x ad5-fbn1	0.0102	*	Yes
	Days	Ad-Empty												Ad-hAsp
	0	0	0	0	0	0	0	0	0	0	0	0		0	0	0	0	0	0	0	0	0	0	0
	7	-0.7	0.7	0.3	0.2	0.9	-0.1	-0.7	-0.9	-2.1	-2.7	-3.1		1	0.5	1.2	1.1	0.9	0.3	0.4	1.1	0.4	0	1.7				AD5-asprosin experiment
	12	0.1	1.2	0.9	0.2	1.4	1.1	0.9	0	2	-1	0.2		1.6	1.1	2.5	2.9	2	1.6	1.1	1.6	1.9	0.3	1.2				Body weight							Food intake								Body weight change
	15	0.2	1.9	1	0.4	2.1	1.1	0.9	0	2	-1	0.2		2.5	1.1	3	3.3	2.5	2.7	1.2	2.1	2.3	1.4	2.4				Fixed effects (type III)	P value	P value summary	Statistically significant (P < 0.05)?				Dunnett's multiple comparisons test	Mean Diff.	95.00% CI of diff.	Below threshold?	Summary	Adjusted P Value			Dunnett's multiple comparisons test	Mean Diff.	95.00% CI of diff.	Below threshold?	Summary	Adjusted P Value
																												Time	<0.0001	****	Yes				Ad-hAsp+ IgG vs. Ad-Empty+ IgG	1.4	0.2602 to 2.540	Yes	*	0.017			Ad-hAsp+ IgG vs. Ad-Empty+ IgG	0.16	-0.1255 to 0.4455	No	ns	0.3094
	Body weight change (g)																											Ad5-asprosin	0.0004	***	Yes				Ad-hAsp+ IgG vs. Ad-hAsp+mAb	1.24	0.04453 to 2.435	Yes	*	0.0421			Ad-hAsp+ IgG vs. Ad-hAsp+mAb	0.36	0.06184 to 0.6582	Yes	*	0.0192
	Days	AAV-Empty											AAV-hAsp															Time x Ad5-asprosin	0.0003	***	Yes
	0	0	0	0	0	0	0	0	0	0			0	0	0	0	0	0	0	0	0	0
	14	1.8	0.1	0.2	1.5	1	1.6	1.1	1.2	1.1			0.8	4	1.2	0.5	1.2	1.8	0.9	2.3	0.8	2.7
	24	1.8	0.2	0.3	2.3	2.7	2	1.2	1.6	1.9			1.9	3.2	1.5	0.6	1.7	1.8	1.3	1.6	1.7	3.7						AAV-asprosin experiment
	32	2.4	0.3	1.4	3.4	2.3	2.4	1.4	2	2.4			1.9	3.7	2	1	1.9	1	2.4	1.9	1.5	4.4						Body weight							Food intake								Body weight change
	42	3.1	0.3	2	4.5	2.6	1.8	2	2.1	2.3			3.1	4.3	3.1		4.2	2	3.2	4.2	2.2	6.9						Fixed effects (type III)	P value	P value summary	Statistically significant (P < 0.05)?				Dunnett's multiple comparisons test	Mean Diff.	95.00% CI of diff.	Below threshold?	Summary	Adjusted P Value			Dunnett's multiple comparisons test	Mean Diff.	95.00% CI of diff.	Below threshold?	Summary	Adjusted P Value
	52	2.7	0.9	2.2	4.2	3.4	1.9	2	1.9	2.6			3.6	3.3	3	2.2	5.1	2.3	3.4	4.8	2.6	6.6						Time	<0.0001	****	Yes				AAV-hAsp+ IgG vs. AAV-Empty+ IgG	0.92	-0.4814 to 2.321	No	ns	0.214			AAV-hAsp+ IgG vs. AAV-Empty+ IgG	-0.04	-0.5077 to 0.4277	No	ns	0.9671
	60	3.5	1.6	2.9	4.4	3.6	2.5	2	3.2	2.8			4	3.4	3	2.1	4.8	2.6	3.7	5.6	3.5	6.2						AAv-asprosin	0.0739	ns	No				AAV-hAsp+ IgG vs. AAV-hAsp+mAb	1.6	0.1986 to 3.001	Yes	*	0.0263			AAV-hAsp+ IgG vs. AAV-hAsp+mAb	0.54	0.07227 to 1.008	Yes	*	0.0248
																												Time x AAv-asprosin	0.0008	***	Yes
	24 h Food intake in response to mAb treatment
	Ad-Empty+ IgG	Ad-hFBN1+ IgG	Ad-hFBN1+mAb			Ad-Empty+ IgG	Ad-hAsp+ IgG	Ad-hAsp+mAb			AAV-Empty+ IgG	AAV-hAsp+ IgG	AAV-hAsp+mAb
	4.4	5	3.8			4	6.6	4.2			3.7	4.7	3.3
	4.5	6.2	3.82			6.8	6.5	5.7			3.7	7.3	4.4
	4.2	5	3.5			5.5	5.5	6			4.7	4.8	4.1
	3.3	7.5	3.8			5	7.7	5.2			6.1	5	3.6
	3.4	4.8	4.6			5.26	6.66	6			4.2	5.2	3.6
	3	8.8	3.4			5	7	6.5
	blood glucose response to mAb treatment
	Ad-Empty+ IgG	Ad-hFBN1+ IgG	Ad-hFBN1+mAb			Ad-Empty+ IgG	Ad-hAsp+ IgG	Ad-hAsp+mAb			AAV-Empty+ IgG	AAV-hAsp+ IgG	AAV-hAsp+mAb
	145	191	150			164	200	151			197	158	175
	123	240	155			143	160	115			160	181	155
	114	200	156			149	221	158			120	188	173
	161	154	136			144	175	135			161	200	185
	136	173	178			127	178	168			170	213	180
						131	193	168
	Body weight change in response ot mAb treatment
	Ad5-Empty + IgG		Body weight				hFBN1 + IgG		Body weight			hFBN1 + mAb
		Before	After	24 h BW change				Before	After	24 h BW change			Before	After	24 h BW change
	1	29.1	29.3	0.2			1	26.2	26.4	0.2		1	26.9	26.9	0
	2	25.3	25.2	-0.1			2	27.2	27.1	-0.1		2	25.6	25.1	-0.5
	3	28.2	28.3	0.1			3	24.6	24.6	0		3	24.7	24.1	-0.6
	4	24	24	0			4	24.9	24.9	0		4	28.3	27.7	-0.6
	5	25.3	25.3	0			5	29.4	29.7	0.3		5	25.9	25.2	-0.7
	6	28.4	28.2	-0.2			6	24.8	24.5	-0.3		6	27.7	27.1	-0.6
	Ad5-Empty + IgG	Before	After	24 h BW change			Ad5- asp + IgG	Before	After	24 h BW change		Ad5- asp + mouse mAb	Before	After	24 h BW change
	1	26.6	26.5	-0.1			1	28	27.7	-0.3		1	25.7	25.4	-0.3
	2	29.3	28.9	-0.4			2	25.6	25.4	-0.2		2	25.3	25.1	-0.2
	3	26.1	26	-0.1			3	30.6	30.3	-0.3		3	26.7	26.6	-0.1
	4	25.2	25.2	0			4	28.7	28.9	0.2		4	27	26.8	-0.2
	5	25.4	25.54	0.14			5	27.3	27.6	0.3		5	25.1	24.7	-0.4
	6	25.8	25.7	-0.1			6	27.8	27.9	0.1		6	26.3	25.7	-0.6
		AAV-Empty+IgG control						AAV-hAsprosin+IgG control						AAV-hAsprosin+anti-asprosin mAb
	Before treatment	31.4	28.9	32.9	35.5	30		32.8	32.4	29.1	30.6	32.9		32	30.3	36	32.1	37.8
	After treatment	31.8	28.8	33	35.8	29.9		32.5	32.4	29.3	31.1	32.9		31.7	30.2	35.7	31.5	36.8
	Body weight change	0.4	-0.1	0.1	0.3	-0.1		-0.3	0	0.2	0.5	0		-0.3	-0.1	-0.3	-0.6	-1
																													Statistical analysis
																													Figure 3-figure supplement 1: Adenovirus and AAV experiments
																													Ad-hFBN1 vs. Ad-Empty
		Figure 3-figure supplement 1: Adenovirus and AAV experiments																											Plasma Glucose				Food intake				Body weight change				Plasma Insulin				Plasma Asprosin
		Body weight change (g)			Food intake (g)			Glucose (mg/dL)			Insulin (ng/ml)			Asprosin fold change (A.U.)															Unpaired t test				Unpaired t test				Unpaired t test				Unpaired t test				Unpaired t test
		Ad-Empty	Ad-hFBN1		Ad-Empty	Ad-hFBN1		Ad-Empty	Ad-hFBN1		Ad-Empty	Ad-hFBN1		Ad-Empty	Ad-hFBN1														P value	0.0043			P value	0.0258			P value	0.0079			P value	0.0032			P value	0.0167
		-0.4	0.8		3.6	8.2		121	201		0.158189	0.559616		0.965925	4.90449														P value summary	**			P value summary	*			P value summary	**			P value summary	**			P value summary	*
		0.3	1.3		5.3	6.9		117	148		0.040193	0.345375		2.36273	2.54928														Significantly different (P < 0.05)?	Yes			Significantly different (P < 0.05)?	Yes			Significantly different (P < 0.05)?	Yes			Significantly different (P < 0.05)?	Yes			Significantly different (P < 0.05)?	Yes
		-0.2	1.8		5.9	6.5		123	204		0.061165	0.649901		0	1.96209														One- or two-tailed P value?	Two-tailed			One- or two-tailed P value?	Two-tailed			One- or two-tailed P value?	Two-tailed			One- or two-tailed P value?	Two-tailed			One- or two-tailed P value?	Two-tailed
		0.3	2.1		4.5	5.4		147	217		0.127664	1.11874		0	2.09468														t, df	t=3.936, df=8			t, df	t=2.732, df=8			t, df	t=3.512, df=8			t, df	t=4.160, df=8			t, df	t=3.014, df=8
		-0.6	0.2		4.825	5.7		162	236		0.112471	0.543068		0.671344	2.8413
																													AAV-hAsprosin vs. AAV-Empty
																													Plasma Glucose				Food intake				Body weight change				Plasma Insulin				Plasma Asprosin
		Body weight change (g)			Food intake (g)			Glucose (mg/dL)			Insulin (ng/ml)			Asprosin fold change (A.U.)															Unpaired t test				Unpaired t test				Unpaired t test				Unpaired t test				Unpaired t test
		Ad-Empty	Ad-hAsprosin		Ad-Empty	Ad-hAsprosin		Ad-Empty	Ad-hAsprosin		Ad-Empty	Ad-hAsprosin		Ad-Empty	Ad-hAsprosin														P value	0.0021			P value	0.0235			P value	0.0429			P value	0.8542			P value	0.0077
		0.1	1.6		3.2	6.3		150	205		0.673	1.0515		0	1.88123														P value summary	**			P value summary	*			P value summary	*			P value summary	ns			P value summary	**
		1.2	1.1		5.2	6.5		105	183		0.8345	0.729		0.330011	2.41843														Significantly different (P < 0.05)?	Yes			Significantly different (P < 0.05)?	Yes			Significantly different (P < 0.05)?	Yes			Significantly different (P < 0.05)?	No			Significantly different (P < 0.05)?	Yes
		0.9	2.5		6.5	6		135	143		0.9285	0.734		1	2.41843														One- or two-tailed P value?	Two-tailed			One- or two-tailed P value?	Two-tailed			One- or two-tailed P value?	Two-tailed			One- or two-tailed P value?	Two-tailed			One- or two-tailed P value?	Two-tailed
		0.2	2.9		5.8	6.5		175	165		0.676	1.061		1.23683	2.6555														t, df	t=3.582, df=18			t, df	t=2.475, df=18			t, df	t=2.178, df=18			t, df	t=0.1864, df=18			t, df	t=2.998, df=18
		0	2		5.6	6.5		190	157		0.508	1.129		0.330011	2.82118
		1.4	1.6		5	7.3		126	235		0.531	1.354		1.44369	1.91909
		1.1	1.1		4.5	6.3		125	161		0.8975	1.0415		1.35726	1.06596														Ad-hAsprosin vs. Ad-Empty
		0.9	0		6.2	5.8		132	180		0.5035	1.2805		1.1049	1.61763														Plasma Glucose				Food intake				Body weight change				Plasma Insulin				Plasma Asprosin
		0	1.6		6.2	6.1		155	195		0.793	1.01		1.04895	2.4911														Unpaired t test				Unpaired t test				Unpaired t test				Unpaired t test				Unpaired t test
		2	1.9		6	5.3		125	196		0.676	1.314		0	1.7754														P value	0.0015			P value	0.0037			P value	0.0067			P value	<0.0001			P value	0.0004
		-1	1		3.5	6.3		141	149		0.508	1.087		%CV>20%	1.23683														P value summary	**			P value summary	**			P value summary	**			P value summary	****			P value summary	***
		0.2	1.2		5	7.7		134	264		not tested	not tested		%CV>20%	0.728281														Significantly different (P < 0.05)?	Yes			Significantly different (P < 0.05)?	Yes			Significantly different (P < 0.05)?	Yes			Significantly different (P < 0.05)?	Yes			Significantly different (P < 0.05)?	Yes
																													One- or two-tailed P value?	Two-tailed			One- or two-tailed P value?	Two-tailed			One- or two-tailed P value?	Two-tailed			One- or two-tailed P value?	Two-tailed			One- or two-tailed P value?	Two-tailed
													CV% of > 20% between duplicates																t, df	t=3.635, df=22			t, df	t=3.242, df=22			t, df	t=2.994, df=22			t, df	t=4.927, df=20			t, df	t=4.258, df=20
		Body weight change (g)			Food intake (g)			Glucose (mg/dL)			Insulin (ng/ml)			Asprosin fold change (A.U.)
		AAV-Empty	AAV-hAsprosin		AAV-Empty	AAV-hAsprosin		AAV-Empty	AAV-hAsprosin		AAV-Empty	AAV-hAsprosin		AAV-Empty	AAV-hAsprosin
		2.7	3.6		5	5		129	224		1.67	1.022		8.12565	9.88146
		0.9	3.7		4.2	7.1		125	177		1.5725	1.812		1	9.64607
		3.5	3		5.3	5.8		129	150		4.083	2.711		0	3.04384
		4.2	2.2		5.3	4.6		190	150		4.745	1.593		0	7.71914
		3.4	5.1		5	5.5		123	168		1.3155	2.26581		0	4.42607
		1.9	2.3		4.2	5.1		123	160		2.22689	2.05		0	4.67935
		2	3.4		4.7	5.5		137	161		2.423	3.2925		0	1.04003
		1.9	4.8		5.1	5.2		162	195		0.9765	1.915		0.87435	1.372
		2.6	2.6		4.1	5.2		123	200		1.734	1.4505		0	2.59604
		2.5	6.6		4.6	5		160	205		1.5225	3.3025		0	4.2828
	Figure 3-figure supplement 2: Raw body weights of Ad5- and AAV- experiments
	Raw Body weight (g)
	Days	Ad-Empty												Ad-hFBN1
	0	27.6	26.7	26.6	24.3	25.8	27.8	28	27.6	28.2	27.8	28.7	28	24.2	26.5	24.8	26.2	26.8	24.4	26.1	24.2	24	27	25.1	26.8
	3	27.6	23.1	27.1	22.5	23.9	27.4	27.3	26.1	26.3	25.4	26.8	27.3	23.5	25.5	23.6	24.4	26.1	23.2	26.1	22.8	22.5	27	24.1	25.8
	9	28.5	24	28.3	24.5	25.1	27.1	27.7	26.6	26.9	27.3	28.5	28.7	25.5	27.6	24.5	26.1	28.2	24.8	26.6	25.1	24.5	28.2	25.2	26.9
	15	28.4	27.7	28.8	27.6	27.8	27.8	28.6	28.4	27.9	27	28.6	28	28.6	28	28.7	28.5	29	28.8	28.7	28.7	28.8	28.7	28.7	28.6
	Raw Body weight (g)
		Ad-Empty												Ad-hAsprosin
	0	26.4	27.4	25.1	24.8	23.7	24.6	24.3	25	26.6	23.6	23.1		25.5	24.5	27.6	25.4	25.8	25.1	24.5	24.6	24.7	23.7	23.9
	7	25.7	28.1	25.4	25	24.6	24.5	23.6	24.1	24.5	20.9	20		26.5	25	28.8	26.5	26.7	25.4	24.9	25.7	25.1	23.7	25.6
	12	26.5	28.6	26	25	25.1	25.7	25.2	25	28.6	22.6	23.3		27.1	25.6	30.1	28.3	27.8	26.7	25.6	26.2	26.6	24	25.1
	15	26.6	29.3	26.1	25.2	25.8	25.7	25.2	25	28.6	22.6	23.3		28	25.6	30.6	28.7	28.3	27.8	25.7	26.7	27	25.1	26.3
	Raw Body weight (g)
		AAV-Empty											AAV-hAsprosin
	0	27.9	27.3	30	31.1	26.4	24.8	29.3	26.1	26			28.8	29	26.5	28.5	28.1	29.4	26.6	30.4	28.6	31
	14	29.7	27.4	30.2	32.6	27.4	26.4	30.4	27.3	27.1			29.6	33	27.7	29	29.3	31.2	27.5	32.7	29.4	34.4
	24	29.7	27.5	30.3	33.4	29.1	26.8	30.5	27.7	27.9			30.7	32.2	28	29.1	29.8	31.2	27.9	32	30.3	35.4
	32	30.3	27.6	31.4	34.5	28.7	27.2	30.7	28.1	28.4			30.7	32.7	28.5	29.5	30	30.4	29	32.3	30.1	36.1
	42	31	27.6	32	35.6	29	26.6	31.3	28.2	28.3			31.9	33.3	29.6	30.1	32.3	31.4	29.8	34.6	30.8	38.6
	52	30.6	28.2	32.2	35.3	29.8	26.7	31.3	28	28.6			32.4	32.3	29.5	30.7	33.2	31.7	30	35.2	31.2	38.3
	60	31.4	28.9	32.9	35.5	30	27.3	31.3	29.3	28.8			32.8	32.4	29.5	30.6	32.9	32	30.3	36	32.1	37.9
