# Supplementary material for: Asprosin-neutralizing antibodies as a treatment for metabolic syndrome
Source: eLife. 2021 Apr 27;10:e63784. doi: 10.7554/eLife.63784 (PMC8102062; doi:10.7554/eLife.63784)
Supplement: Figure 4—source data 1. [file elife-63784-fig4-data1.xlsx]

## Sheet: Sheet1
	Figure 4: DIO, Db/Db and AMLN experiments																											Statistical analysis
	DIO 11 day experiment				DIO 13 day experiment																							Figure 4: anti asprosin mAb experiments
	Body weight (g)				Body weight (g)
	IgG control	mouse mAb			IgG control	mouse mAb																						DIO Day 11 Body weight			DIO Day 11 Glucose tolerance test (2way ANOVA)							DIO Day 13 Body weight			DIO Day 13 Glucose tolerance test (2way ANOVA)
	40.9	35.3			39.7	34.4																							mouse mAb		ANOVA table	SS (Type III)	DF	MS	F (DFn, DFd)	P value			mouse mAb		ANOVA table	SS	DF	MS	F (DFn, DFd)	P value
	39.8	39.2			38.9	37.9																							vs.		Interaction	35921	4	8980	F (4, 45) = 1.443	P=0.2355			vs.		Interaction	17767	4	4442	F (4, 40) = 1.017	P=0.4105
	50	31.7			47.2	31.2																							IgG control		Time	674303	4	168576	F (4, 45) = 27.09	P<0.0001			IgG control		Time	584804	4	146201	F (4, 40) = 33.46	P<0.0001
	43	39.1			41.4	37.3																						Unpaired t test			mAb	116139	1	116139	F (1, 45) = 18.66	P<0.0001		Unpaired t test			mAb	2380	1	2380	F (1, 40) = 0.5448	P=0.4648
	40	40.6			37.4	38.6																						P value	0.0571		Residual	280048	45	6223				P value	0.0497		Residual	174786	40	4370
																												P value summary	ns									P value summary	*
	Day 11 Glucose tolerance test																											Significantly different (P < 0.05)?	No									Significantly different (P < 0.05)?	Yes
	Time (min)	IgG control						mouse mAb																				One- or two-tailed P value?	Two-tailed									One- or two-tailed P value?	Two-tailed
	0	331	232	187	316	191	242	207	249	189	248	230																t, df	t=2.221, df=8									t, df	t=2.310, df=8
	15	600	419	494	549	498	489	435	499	400	480	393
	30	600	584	506	600	511	600	376	512	430	600	551
	60	571	469	334	568	574	525	278	482	239	575	506
	120	532	456	411	355	516	236	218	239	123	301	352
																												DIO-14 days experiment
	Day 13 Glucose tolerance test																											Change in body weight (two way anova)										Food intake	Glucose	Insulin
	Time (min)	IgG control						mouse mAb																				ANOVA table	SS	DF	MS	F (DFn, DFd)	P value					mouse mAb	mouse mAb	mouse mAb
	0	289	280	166	203	213		263	315	234	242	270																Time x anti-asprosin mAB	182.8	14	13.06	F (14, 210) = 5.581	P<0.0001			Unpaired t test		vs. IgG	vs. IgG	vs. IgG
	15	529	442	408	505	482		518	503	471	547	474																Time	204.4	14	14.6	F (2.744, 41.17) = 6.241	P=0.0018		P value			0.0267	0.0361	0.0326
	30	514	600	425	549	527		544	423	412	514	537																anti-asprosin mAB	578.7	1	578.7	F (1, 15) = 10.37	P=0.0057		P value summary			*	*	*
	60	524	600	266	486	483		475	401	322	421	484																Subject	837.4	15	55.83	F (15, 210) = 23.87	P<0.0001		Significantly different (P < 0.05)?			Yes	Yes	Yes
	120	326	290	181	409	300		278	237	209	235	323																Residual	491.3	210	2.339				One- or two-tailed P value?			Two-tailed	Two-tailed	Two-tailed
																																			t, df			t=2.710, df=8	t=2.515, df=8	t=2.766, df=6
	DIO 14 days experiment
		% change in body weight																										LepR(db/db)-14 days experiment										Food intake	Glucose	Insulin
	Days	IgG control										mouse mAb																Change in body weight (2 way anova)										mouse mAb	mouse mAb	mouse mAb
	0	0	0	0	0	0	0	0	0	0		0	0	0	0	0	0	0	0									ANOVA table	SS	DF	MS	F (DFn, DFd)	P value			Unpaired t test		vs. IgG	vs. IgG	vs. IgG
	1	-1.08303	-0.753296	-0.192308	-0.384615	-0.790514	0	-0.383877	-1.26812	-1.33843		-0.910747	-0.16835	-1.83673	-1.2987	-4.67742	-0.924214	-1.01695	-0.546448									Time x anti asprosin mAb	123.6	14	8.828	F (14, 140) = 5.391	P<0.0001		P value			0.0022	0.0113	0.5662
	2	-2.34657	-3.01318	-2.5	-3.26923	-2.56917	-1.42349	-1.53551	-3.07971	-3.63289		-4.91803	-1.51515	-2.04082	-1.11317	-6.77419	-1.2939	-2.54237	-1.82149									Time	459.7	14	32.84	F (3.778, 37.78) = 20.05	P<0.0001		P value summary			**	*	ns
	3	-2.16606	-2.44821	-2.11538	-3.26923	-1.18577	-1.06762	-0.191939	-3.07971	-3.44168		-5.28233	-2.0202	-2.65306	-2.78293	-10.6452	-1.10906	-2.71186	-2.73224									anti asprosin mAb	1305	1	1305	F (1, 10) = 15.71	P=0.0027		Significantly different (P < 0.05)?			Yes	Yes	No
	4	-1.98556	-1.88324	-2.11538	-3.46154	-0.197628	-0.88968	-0.191939	-3.44203	-2.29446		-7.10383	-2.3569	-3.67347	-2.5974	-11.2903	-2.03327	-11.5254	-5.28233									Subject	831.1	10	83.11	F (10, 140) = 50.75	P<0.0001		One- or two-tailed P value?			Two-tailed	Two-tailed	Two-tailed
	5	-2.70758	-1.88324	-1.73077	-2.11538	1.18577	-0.88968	0.383877	-6.34058	-2.48566		-6.19308	-2.3569	-4.08163	-2.04082	-11.9355	-2.21811	-3.22034	-6.37523									Residual	229.3	140	1.638				t, df			t=4.439, df=8	t=3.275, df=8	t=0.5932, df=10
	6	-3.4296	-1.88324	-1.73077	-1.92308	0.790514	-1.77936	0.767754	-6.34058	-2.67686		-5.46448	-1.51515	-3.67347	-2.04082	-10.9677	-2.77264	-2.54237	-5.82878
	7	-2.88809	-1.31827	-1.73077	-2.11538	2.7668	-1.24555	1.15163	-6.15942	-2.86807		-5.28233	-2.52525	-3.67347	-1.66976	-10.9677	-3.51201	-3.05085	-6.01093
	8	-3.06859	-0.376648	-0.961538	-1.15385	2.56917	-0.355872	1.72745	-6.7029	-2.29446		-5.28233	-3.367	-2.85714	-2.41187	-9.67742	-3.51201	-3.22034	-6.73953									NASH-14 days experiment										Food intake	Glucose	Insulin
	9	-2.88809	-0.188324	0.576923	-1.34615	4.74308	-0.88968	2.11132	-7.24638	-2.29446		-6.19308	-4.0404	-2.44898	-1.11317	-7.90323	-3.69686	-2.20339	-6.73953									Change in body weight (2 way anova)										mouse mAb	mouse mAb	mouse mAb
	10	-2.16606	0	0.192308	-1.34615	4.94071	-0.355872	2.87908	-7.06522	-1.72084		-6.19308	-3.53535	-1.63265	-3.15399	-7.74194	-3.32717	-2.54237	-7.28597									ANOVA table	SS	DF	MS	F (DFn, DFd)	P value			Unpaired t test		vs. IgG	vs. IgG	vs. IgG
	11	-1.80505	0.376648	0.192308	-1.15385	4.1502	0	2.87908	-5.97826	-1.52964		-3.82514	-3.87205	-1.83673	-3.71058	-6.29032	-3.51201	-3.72881	-8.19672									Time x anti asprosim mAb	303.2	14	21.66	F (14, 168) = 15.27	P<0.0001		P value			0.0008	0.0006	0.2491
	12	-1.26354	0.94162	0.384615	1.34615	4.74308	0	3.45489	-6.34058	-1.33843		-4.55373	-3.87205	-2.2449	-4.26716	-6.29032	-4.43623	-3.22034	-8.01457									Time	615.7	14	43.98	F (2.712, 32.54) = 31.00	P<0.0001		P value summary			***	***	ns
	13	-0.722022	0.376648	0	1.92308	4.74308	-0.355872	3.64683	-6.52174	-0.956023		-3.09654	-6.39731	-3.87755	-5.38033	-5.32258	-3.51201	-3.38983	-7.46812									anti asprosim mAb	3556	1	3556	F (1, 12) = 109.4	P<0.0001		Significantly different (P < 0.05)?			Yes	Yes	No
	14	-0.722022	0.376648	0.384615	3.07692	5.33597	0.88968	3.64683	-5.25362	-1.91205		-3.46084	-7.40741	-4.08163	-6.30798	-4.83871	-4.06654	-3.72881	-7.46812									Subject	390.2	12	32.51	F (12, 168) = 22.92	P<0.0001		One- or two-tailed P value?			Two-tailed	Two-tailed	One-tailed
																												Residual	238.3	168	1.418				t, df			t=4.459, df=12	t=4.615, df=12	t=0.6986, df=12
	LepR(Db/Db)
	Days	IgG control						Mouse mAb
	0	0	0	0	0	0	0	0	0	0	0	0	0
	1	5.27473	4.5045	6.12813	3.01724	-1.35135	0	-1.86916	-0.1992	-0.39448	0	-1.42566	-3.43008
	2	5.27473	5.40541	6.40669	3.23276	0	1.4	0.46729	-0.39841	0.591716	0.992063	-1.01833	-3.16623
	3	7.03297	7.50751	9.7493	4.09483	0.579151	2.6	-1.40187	0.996016	0.394477	0.198413	0	-2.11082
	4	10.1099	8.70871	8.6351	7.75862	-1.9305	1.8	0.46729	1.59363	0.591716	0.992063	-1.222	-2.37467
	5	9.23077	9.00901	13.0919	7.32759	1.73745	3.2	1.40187	1.59363	1.97239	1.98413	1.62933	-1.31926
	6	8.13187	8.10811	9.47075	6.03448	0.772201	3	-0.70093	1.59363	1.57791	0.992063	0.407332	-2.11082
	7	5.93407	5.70571	9.1922	4.52586	0	-0.6	-1.16822	0	0.788955	-1.19048	-2.03666	-2.11082
	8	7.25275	1.5015	8.35655	3.87931	1.1583	1	-3.50467	0.59761	-0.59172	-1.78571	-3.86965	-5.27704
	9	8.13187	6.60661	8.91365	6.03448	2.50965	3.8	0.934579	1.99203	1.38067	0.992063	-1.01833	-0.79156
	10	9.23077	5.40541	10.0279	8.62069	2.50965	3.8	-0.70093	1.79283	2.36686	1.19048	0.407332	-2.37467
	11	10.5495	6.90691	13.0919	9.05172	2.89575	5.2	-0.46729	2.78884	2.95858	1.78571	0.814664	-2.90237
	12	12.5275	10.2102	12.5348	9.48276	3.66795	5.8	0.233645	4.38247	3.94477	3.1746	2.03666	1.31926
	13	12.5275	6.00601	11.9777	8.62069	4.2471	6	-0.70093	4.58167	3.94477	2.18254	1.83299	-1.31926
	14	10.989	3.3033	10.0279	7.11207	2.50965	5.4	-0.23364	-0.79681	3.74754	1.38889	0.407332	-3.95778
	AMLN 14 days experiment
	Days	IgG							Mouse mAb
	0	0	0	0	0	0	0	0	0	0	0	0	0	0	0
	1	-0.710901	0.74813	1.36364	-0.481928	0.659341	-0.813008	-0.575816	-4.83516	-7.07763	-6.42398	-5.55556	-7.47863	-5.19802	-5.18518
	2	0.236967	-0.249377	-0.454545	-0.481928	0.659341	0.406504	-0.767754	-5.27473	-10.7306	-9.42184	-6.66667	-10.4701	-5.69307	-7.40741
	3	-0.236967	-1.49626	0	0	-0.659341	0.203252	0	-5.49451	-12.5571	-10.4925	-7.11111	-11.1111	-6.18812	-7.16049
	4	0.473934	-0.498753	0.681818	0.481928	-0.659341	-0.813008	-1.15163	-6.37363	-12.7854	-12.2056	-7.55556	-11.5385	-4.70297	-8.88889
	5	-0.236967	-0.498753	-0.681818	-0.722892	-1.0989	-0.813008	0.575816	-6.15385	-11.6438	-11.349	-6.88889	-12.6068	-5.19802	-8.88889
	6	-0.947867	-1.24688	-1.36364	-2.16867	-1.31868	0.406504	0.383877	-7.25275	-12.1005	-11.7773	-9.11111	-13.4615	-4.9505	-8.14815
	7	-1.65877	-1.24688	-1.59091	-2.16867	-1.31868	-1.01626	-0.191939	-10.5495	-12.7854	-12.2056	-9.77778	-14.3162	-6.68317	-9.1358
	8	-1.4218	-0.498753	-1.36364	-2.40964	-0.879121	-1.01626	-1.15163	-12.967	-13.242	-12.2056	-9.55556	-15.1709	-7.67327	-10.1235
	9	-1.89573	-1.99501	-1.59091	-2.6506	-2.41758	-2.64228	-2.11132	-15.1648	-13.0137	-11.7773	-10.2222	-16.0256	-7.42574	-10.1235
	10	-1.4218	-0.249377	-1.13636	-0.963855	-0.21978	-0.813008	-0.767754	-14.7253	-9.58904	-10.4925	-8.88889	-14.1026	-5.19802	-8.88889
	11	-2.1327	-0.249377	-0.227273	-2.40964	-0.659341	-0.406504	-1.15163	-13.1868	-11.1872	-10.7066	-8.44444	-14.1026	-6.43564	-9.87654
	12	-0.947867	-1.49626	-0.454545	-2.40964	0.659341	-0.609756	-2.11132	-12.0879	-10.7306	-10.4925	-8.66667	-12.8205	-5.19802	-9.1358
	13	-0.236967	-1.24688	-0.227273	-2.16867	0.21978	-1.62602	-1.15163	-12.5275	-10.7306	-10.0642	-8.44444	-12.8205	-7.42574	-8.88889
	14	-2.36967	-2.49377	-0.909091	-3.85542	-1.53846	-3.86179	-4.60653	-12.5275	-10.7306	-11.5632	-9.33333	-15.1709	-9.40594	-11.6049
		Food intake											Glucose (Day 14)
		DIO				Db/DB			AMLN				DIO			Db/DB			AMLN
		IgG control	mouse mAb			IgG control	mouse mAb		IgG control	mouse mAb			IgG control	mouse mAb		IgG control	mouse mAb		IgG control	mouse mAb
		4.155	2.235			6.2	4.12		3.2	3.1			233.013	141.718		544	278		227.178	186.369
		3.315	2.22			7.27	5.03		3.6	3.3			236.881	170		404	366		230.379	183.169
		5.295	3.66			6.19	5.07		3.6	2.4			246.939	157.966		380	313		267.186	207.974
		3.63	3.42			7.92	5.84		3.7	2.9			205.16	150.229		414	328		321.598	217.576
		4.09875	2.88375			6.895	4.11		3.6	3			133.208	167.25		398	319		275.988	193.571
									3.2	2.9									233.579	205.573
									3.6	2.8									272.787	162.364
													Grubbs' outlier analysis with Q= 1% (outliers indicated in blue italics)
		Insulin (Day 14)				Db/DB			AMLN
		IgG control	mouse mAb			IgG control	mouse mAb		IgG control	mouse mAb
		4.565	2.228			5.288	4.7		1.038	0.645
		3.774	CV>20%			4.143	1.772		1.116	0.976
		8.107	2.043			8.821	3.982		0.863	1.142
		4.147	1.436			6.891	6.524		1.474	1.124
		CV>20%	3.151			4.767	7.405		0.695	1.282
									1.437	0.984
									1.142	0.972
		Elisa duplicates showing a CV>20% were excluded from analysis
	Figure 4-figure supplement 1
	Raw Body weight values (g)
	DIO 14 days experiment
		IgG control										mouse mAb
	0	55.4	53.1	52	52	50.6	56.2	52.1	55.2	52.3		54.9	59.4	49	53.9	62	54.1	59	54.9
	1	54.8	52.7	51.9	51.8	50.2	56.2	51.9	54.5	51.6		54.4	59.3	48.1	53.2	59.1	53.6	58.4	54.6
	2	54.1	51.5	50.7	50.3	49.3	55.4	51.3	53.5	50.4		52.2	58.5	48	53.3	57.8	53.4	57.5	53.9
	3	54.2	51.8	50.9	50.3	50	55.6	52	53.5	50.5		52	58.2	47.7	52.4	55.4	53.5	57.4	53.4
	4	54.3	52.1	50.9	50.2	50.5	55.7	52	53.3	51.1		51	58	47.2	52.5	55	53	52.2	52
	5	53.9	52.1	51.1	50.9	51.2	55.7	52.3	51.7	51		51.5	58	47	52.8	54.6	52.9	57.1	51.4
	6	53.5	52.1	51.1	51	51	55.2	52.5	51.7	50.9		51.9	58.5	47.2	52.8	55.2	52.6	57.5	51.7
	7	53.8	52.4	51.1	50.9	52	55.5	52.7	51.8	50.8		52	57.9	47.2	53	55.2	52.2	57.2	51.6
	8	53.7	52.9	51.5	51.4	51.9	56	53	51.5	51.1		52	57.4	47.6	52.6	56	52.2	57.1	51.2
	9	53.8	53	52.3	51.3	53	55.7	53.2	51.2	51.1		51.5	57	47.8	53.3	57.1	52.1	57.7	51.2
	10	54.2	53.1	52.1	51.3	53.1	56	53.6	51.3	51.4		51.5	57.3	48.2	52.2	57.2	52.3	57.5	50.9
	11	54.4	53.3	52.1	51.4	52.7	56.2	53.6	51.9	51.5		52.8	57.1	48.1	51.9	58.1	52.2	56.8	50.4
	12	54.7	53.6	52.2	52.7	53	56.2	53.9	51.7	51.6		52.4	57.1	47.9	51.6	58.1	51.7	57.1	50.5
	13	55	53.3	52	53	53	56	54	51.6	51.8		53.2	55.6	47.1	51	58.7	52.2	57	50.8
	14	55	53.3	52.2	53.6	53.3	56.7	54	52.3	51.3		53	55	47	50.5	59	51.9	56.8	50.8
	Leptin receptor (Db/Db) mice 14 days experiment
	Days	IgG control							mouse mAb
	0	45.5	33.3	35.9	46.4	51.8	50		42.8	50.2	50.7	50.4	49.1	37.9
	1	47.9	34.8	38.1	47.8	51.1	50		42	50.1	50.5	50.4	48.4	36.6
	2	47.9	35.1	38.2	47.9	51.8	50.7		43	50	51	50.9	48.6	36.7
	3	48.7	35.8	39.4	48.3	52.1	51.3		42.2	50.7	50.9	50.5	49.1	37.1
	4	50.1	36.2	39	50	50.8	50.9		43	51	51	50.9	48.5	37
	5	49.7	36.3	40.6	49.8	52.7	51.6		43.4	51	51.7	51.4	49.9	37.4
	6	49.2	36	39.3	49.2	52.2	51.5		42.5	51	51.5	50.9	49.3	37.1
	7	48.2	35.2	39.2	48.5	51.8	49.7		42.3	50.2	51.1	49.8	48.1	37.1
	8	48.8	33.8	38.9	48.2	52.4	50.5		41.3	50.5	50.4	49.5	47.2	35.9
	9	49.2	35.5	39.1	49.2	53.1	51.9		43.2	51.2	51.4	50.9	48.6	37.6
	10	49.7	35.1	39.5	50.4	53.1	51.9		42.5	51.1	51.9	51	49.3	37
	11	50.3	35.6	40.6	50.6	53.3	52.6		42.6	51.6	52.2	51.3	49.5	36.8
	12	51.2	36.7	40.4	50.8	53.7	52.9		42.9	52.4	52.7	52	50.1	38.4
	13	51.2	35.3	40.2	50.4	54	53		42.5	52.5	52.7	51.5	50	37.4
	14	50.5	34.4	39.5	49.7	53.1	52.7		42.7	49.8	52.6	51.1	49.3	36.4
	AMLN 14 days experiment
	Days	IgG control							mouse mAb
	0	42.2	40.1	44	41.5	45.5	49.2	52.1	45.5	43.8	46.7	45	46.8	40.4	40.5
	1	41.9	40.4	44.6	41.3	45.8	48.8	51.8	43.3	40.7	43.7	42.5	43.3	38.3	38.4
	2	42.3	40	43.8	41.3	45.8	49.4	51.7	43.1	39.1	42.3	42	41.9	38.1	37.5
	3	42.1	39.5	44	41.5	45.2	49.3	52.1	43	38.3	41.8	41.8	41.6	37.9	37.6
	4	42.4	39.9	44.3	41.7	45.2	48.8	51.5	42.6	38.2	41	41.6	41.4	38.5	36.9
	5	42.1	39.9	43.7	41.2	45	48.8	52.4	42.7	38.7	41.4	41.9	40.9	38.3	36.9
	6	41.8	39.6	43.4	40.6	44.9	49.4	52.3	42.2	38.5	41.2	40.9	40.5	38.4	37.2
	7	41.5	39.6	43.3	40.6	44.9	48.7	52	40.7	38.2	41	40.6	40.1	37.7	36.8
	8	41.6	39.9	43.4	40.5	45.1	48.7	51.5	39.6	38	41	40.7	39.7	37.3	36.4
	9	41.4	39.3	43.3	40.4	44.4	47.9	51	38.6	38.1	41.2	40.4	39.3	37.4	36.4
	10	41.6	40	43.5	41.1	45.4	48.8	51.7	38.8	39.6	41.8	41	40.2	38.3	36.9
	11	41.3	40	43.9	40.5	45.2	49	51.5	39.5	38.9	41.7	41.2	40.2	37.8	36.5
	12	41.8	39.5	43.8	40.5	45.8	48.9	51	40	39.1	41.8	41.1	40.8	38.3	36.8
	13	42.1	39.6	43.9	40.6	45.6	48.4	51.5	39.8	39.1	42	41.2	40.8	37.4	36.9
	14	41.2	39.1	43.6	39.9	44.8	47.3	49.7	39.8	39.1	41.3	40.8	39.7	36.6	35.8
	Figure 4-figure supplement 2
																																		Statistical analysis
	30 weeks old Db/Db mice			Raw body weight (g)												30 weeks old Db/Db mice			%change in body weight
	Days	mouse mAb						IgG Control								Days	mouse mAb						IgG Control											Figure 4-figure supplement 2
	0	47.9	49.5	49.4	65.6	59.8		74.2	69.3	52.1	45.4	66.4				0	0	0	0	0	0		0	0	0	0	0							Db/Db mice
	1	47.7	46.6	50.3	66.2	60.5		74.3	69.6	52.4	46	66.7				1	-0.417537	-5.85859	1.82186	0.914634	1.17057		0.134771	0.4329	0.575816	1.32159	0.451807							2way Analysis of variance
	2	46.8	47.8	48.2	66.4	58.9		74.3	69.4	53.1	45.9	66.6				2	-2.29645	-3.43434	-2.42915	1.21951	-1.50502		0.134771	0.1443	1.91939	1.10132	0.301205							ANOVA table	SS	DF	MS	F (DFn, DFd)	P value
	3	46.1	47.2	48.3	65	60.5		74.6	69.9	50.5	46.6	66.3				3	-3.75783	-4.64646	-2.22672	-0.914634	1.17057		0.539084	0.865801	-3.07102	2.64317	-0.150602							Time x Column Factor	367.2	21	17.49	F (21, 168) = 2.923	P<0.0001
	4	45.5	48.3	48.1	65.2	58.3		74.2	70.1	51.2	45.4	66.5				4	-5.01044	-2.42424	-2.63158	-0.609756	-2.50836		0	1.1544	-1.72745	0	0.150602							Time	537.7	21	25.61	F (1.579, 12.64) = 4.280	P=0.0454
	5	45.2	48	48.4	65.4	59		73.9	70.1	51.4	45.3	66.9				5	-5.63674	-3.0303	-2.02429	-0.304878	-1.33779		-0.404313	1.1544	-1.34357	-0.220264	0.753012							Antibody treatment	1472	1	1472	F (1, 8) = 6.151	P=0.0381
	6	45.3	46.6	47.3	65.7	57.4		74.8	70.7	51.2	45.7	67.6				6	-5.42797	-5.85859	-4.25101	0.152439	-4.01338		0.808625	2.0202	-1.72745	0.660793	1.80723							Subject	1915	8	239.4	F (8, 168) = 40.02	P<0.0001
	7	45.5	46.8	46.8	66.1	58.1		74.5	71.1	51.8	46.6	67.5				7	-5.01044	-5.45455	-5.26316	0.762195	-2.84281		0.404313	2.5974	-0.575816	2.64317	1.65663							Residual	1005	168	5.982
	8	45.4	47.7	47.9	66.2	56.7		74.8	70.9	51.7	43.1	68.3				8	-5.21921	-3.63636	-3.03644	0.914634	-5.18395		0.808625	2.3088	-0.767754	-5.06608	2.86145
	9	44.6	46.7	47.4	66.3	57.7		75.1	71.5	50.3	44	69.2				9	-6.88935	-5.65657	-4.04858	1.06707	-3.51171		1.21294	3.1746	-3.45489	-3.0837	4.21687
	10	43.5	45.8	47.3	66.7	55.9		75	71.7	51.6	43.8	68.7				10	-9.1858	-7.47475	-4.25101	1.67683	-6.52174		1.07817	3.4632	-0.959693	-3.52423	3.46386
	11	42.7	46	47	66.8	55.4		74.4	72	50.2	44.1	68.8				11	-10.8559	-7.07071	-4.8583	1.82927	-7.35786		0.269542	3.8961	-3.64683	-2.86344	3.61446
	12	42.6	46.8	46.6	65.6	54.8		74.3	71.2	50.6	43.5	68.6				12	-11.0647	-5.45455	-5.66802	0	-8.3612		0.134771	2.7417	-2.87908	-4.18502	3.31325
	13	43.3	45.5	47.4	67.2	54.2		74.9	71.4	50	43.3	68.4				13	-9.60334	-8.08081	-4.04858	2.43902	-9.36455		0.943396	3.0303	-4.03071	-4.62555	3.01205							DIO mice
	14	42.4	43.6	46.9	67.7	55.2		76.7	72.5	48.9	42.5	68.8				14	-11.4823	-11.9192	-5.06073	3.20122	-7.69231		3.36927	4.6176	-6.14203	-6.38767	3.61446							2way Analysis of variance
	15	42	43.6	46	66.5	54.4		75.9	72.9	50.3	42.5	68.9				15	-12.3173	-11.9192	-6.88259	1.37195	-9.0301		2.29111	5.19481	-3.45489	-6.38767	3.76506							ANOVA table	SS	DF	MS	F (DFn, DFd)	P value
	16	41.5	44.9	46.1	66.8	53.3		75.2	72.1	49.6	42.4	68.5				16	-13.3612	-9.29293	-6.68016	1.82927	-10.8696		1.34771	4.0404	-4.79846	-6.60793	3.16265							Time x Antibody Treatment	164.2	14	11.73	F (14, 84) = 7.217	P<0.0001
	17	41.3	44.4	44.8	66.5	52.5		75.7	72.5	50.2	42.1	68.6				17	-13.7787	-10.303	-9.31174	1.37195	-12.2074		2.02156	4.6176	-3.64683	-7.26872	3.31325							Time	41.64	14	2.974	F (1.360, 8.158) = 1.830	P=0.2181
	18	40.8	45.5	45.3	66.5	52.8		74.9	72.2	47.7	41.7	68.7				18	-14.8225	-8.08081	-8.2996	1.37195	-11.7057		0.943396	4.1847	-8.4453	-8.14978	3.46386							Antibody Treatment	693.5	1	693.5	F (1, 6) = 11.08	P=0.0158
	19	40.5	43.3	45.7	66.9	53.3		75.6	72.5	47.5	42.9	68.9				19	-15.4489	-12.5253	-7.48988	1.98171	-10.8696		1.88679	4.6176	-8.82917	-5.50661	3.76506							Subject	375.6	6	62.6	F (6, 84) = 38.52	P<0.0001
	20	41.2	45.2	44.6	65.8	52.9		76.3	72.7	48.6	43.3	69.3				20	-13.9875	-8.68687	-9.7166	0.304878	-11.5385		2.83019	4.9062	-6.71785	-4.62555	4.36747							Residual	136.5	84	1.625
	21	41.1	45.8	45.1	65.9	51.4		75.5	72.5	50.1	43.3	69.1				21	-14.1962	-7.47475	-8.70445	0.457317	-14.0468		1.75202	4.6176	-3.83877	-4.62555	4.06627
	16 weeks old DIO mice			Raw body weight (g)												16 weeks old DIO mice				% change in body weight
	Days	mAB						IgG Control								Days	mAB						IgG Control
	0	38.8	44.1	41.1	49.4			46.8	46.1	42.1	52.5					0	0	0	0	0			0	0	0	0
	1	38.8	43.9	40.9	49.7			47.6	46.1	42.8	52.6					1	0	-0.45	-0.49	0.61			1.71	0	1.66	0.19
	2	38.5	43.1	40.6	49.1			47.4	45.7	42.8	52.5					2	-0.77	-2.27	-1.22	-0.61			1.28	-0.87	1.66	0
	3	37.8	42.5	40.3	48.7			47.8	45.8	42.8	52					3	-2.58	-3.63	-1.95	-1.42			2.14	-0.65	1.66	-0.95
	4	37.6	42.4	40.1	48.5			47.5	45.8	42.7	51.6					4	-3.09	-3.85	-2.43	-1.82			1.5	-0.65	1.43	-1.71
	5	38.1	41.5	40.3	48.3			48.9	46.7	43.5	52.7					5	-1.8	-5.9	-1.95	-2.23			4.49	1.3	3.33	0.38
	6	38	40.7	39.4	48.1			48.5	46.1	43.1	52.1					6	-2.06	-7.71	-4.14	-2.63			3.63	0	2.38	-0.76
	7	37.6	40.9	39.4	48.5			48.7	46	42.9	52.4					7	-3.09	-7.26	-4.14	-1.82			4.06	-0.22	1.9	-0.19
	8	37.8	40.7	39.1	48.3			49.2	46.5	43.5	52.5					8	-2.58	-7.71	-4.87	-2.23			5.13	0.87	3.33	0
	9	37.9	40.6	39.1	48			49.2	46.5	43.5	52.7					9	-2.32	-7.94	-4.87	-2.83			5.13	0.87	3.33	0.38
	10	38	40.8	39.1	48.4			49.2	46.5	43.5	52.7					10	-2.06	-7.48	-4.87	-2.02			5.13	0.87	3.33	0.38
	11	38.2	40.9	39.2	48.5			49.3	46.6	43.6	52.8					11	-1.55	-7.26	-4.62	-1.82			5.34	1.08	3.56	0.57
	12	38.5	40.5	39.8	49			50.3	47.2	44	52.3					12	-0.77	-8.16	-3.16	-0.81			7.48	2.39	4.51	-0.38
	13	39.1	40.3	39.5	48.5			51	47	43.8	52.1					13	0.77	-8.62	-3.89	-1.82			8.97	1.95	4.04	-0.76
	14	38	40.2	40	49.3			50.8	47	44.1	52					14	-2.06	-8.84	-2.68	-0.2			8.55	1.95	4.75	-0.95
	Figure 4-figure supplement 3: plasma panel																																	Statistical analysis
	DIO single day experiment																																	Figure 4-figure supplement 3: plasma panel
	Total cholestrol	mg/dL		HDL	mg/dL		LDL	mg/dL		Triglycerides	mg/dL		Free fatty acid	mEq/L		glycerol	mg/dL																	DIO- single day experiment
	IgG control	mouse mAb		IgG control	mouse mAb		IgG control	mouse mAb		IgG control	mouse mAb		IgG control	mouse mAb		IgG control	mouse mAb																	HDL			LDL			TC			TG			FFA			Glycerol
	189.613	147.281		95.6591	101.932		79.1068	44.2136		46.078	36.487		1.958	1.486		43.023	12.042																	Unpaired t test			Unpaired t test			Unpaired t test			Unpaired t test			Unpaired t test			Unpaired t test
	164.711	87.676		84.6818	70.5682		66.8738	15.9029		41	34.23		1.737	1.218		19.46	18.169																	P value	0.3532		P value	0.025		P value	0.0305		P value	0.0099		P value	0.2135		P value
	139.81	146.036		73.7045	90.9545		50.1553	43.6311		38.179	34.23		1.596	1.061		26.241	14.624																	P value summary	ns		P value summary	*		P value summary	*		P value summary	**		P value summary	ns		P value summary
	215.759	143.875		111.341	76.8409		81.5534	47		38.179	34.23		1.863	1.549		17.205	10.71																	Significantly different (P < 0.05)?	No		Significantly different (P < 0.05)?	Yes		Significantly different (P < 0.05)?	Yes		Significantly different (P < 0.05)?	Yes		Significantly different (P < 0.05)?	No		Significantly different (P < 0.05)?
	143.545	143.545		81.5455	69		58.3107	59.1262		35.923	33.666		1.722	1.848		19.25	10.91																	t, df	t=0.9735, df=10		t, df	t=2.229, df=10		t, df	t=2.110, df=10		t, df	t=3.173, df=10		t, df	t=1.329, df=10		t, df
	177.162	162.221		112.909	98.7955		47.301	57.4951		38.744	36.29		1.391	1.863		10.64	13.333
																																		DIO-14 days
	DIO 14 days experiment																																	HDL			LDL			TC			TG			FFA			Glycerol
	Total cholestrol	mg/dL		HDL	mg/dL		LDL	mg/dL		Triglycerides	mg/dL		Free fatty acid	mEq/L		glycerol	mg/dL																		Data Set-A			Data Set-A			Data Set-A			Data Set-A			Data Set-A
	IgG control	mouse mAb		IgG control	mouse mAb		IgG control	mouse mAb		IgG control	mouse mAb		IgG control	mouse mAb		IgG control	mouse mAb																	Unpaired t test			Unpaired t test			Unpaired t test			Unpaired t test			Unpaired t test			Unpaired t test
	190.484	137.024		113.454	81.5455		70.9333	70.9333		46.687	36.898		0.928	1.1804		22.795	22.795																	P value	0.0492		P value	0.4527		P value	0.0423		P value	0.3344		P value	0.0199		P value
	198.443	151.58		127.636	129.409		57.6333	48.7667		47.44	54.217		0.928	1.039		26.722	25.413																	P value summary	*		P value summary	ns		P value summary	*		P value summary	ns		P value summary	*		P value summary
	162.63	118.858		143.591	92.1818		39.9	41.9667		33.133	52.711		0.915	0.989		25.413	37.192																	Significantly different (P < 0.05)?	Yes		Significantly different (P < 0.05)?	No		Significantly different (P < 0.05)?	Yes		Significantly different (P < 0.05)?	No		Significantly different (P < 0.05)?	Yes		Significantly different (P < 0.05)?
	206.401	183.852		125.864	90.4091		53.2	63.1		45.934	46.687		0.825	1.014		38.501	34.575																	t, df	t=2.376, df=7		t, df	t=0.7894, df=8		t, df	t=2.478, df=7		t, df	t=0.4439, df=8		t, df	t=2.899, df=8		t, df
	51.211*	166.609		44.31818*	111.682		22.1667	57.5333		31.627	27.861		0.618	0.994		16.251	18.869
	Grubbs' outlier analysis with Q= 1% (outliers indicated in blue italics)
																																		Db/Db-14 days
	Lepr (Db/Db) 14 days experiment																																	HDL			LDL			TC			TG			FFA			Glycerol
	Total cholestrol	mg/dL		HDL	mg/dL		LDL	mg/dL		Triglycerides	mg/dL		Free fatty acid	mEq/L		glycerol	mg/dL																	Unpaired t test			Unpaired t test			Unpaired t test			Unpaired t test			Unpaired t test			Unpaired t test
	IgG control	mouse mAb		IgG control	mouse mAb		IgG control	mouse mAb		IgG control	mouse mAb		IgG control	mouse mAb		IgG control	mouse mAb																	P value	0.7792		P value	0.7536		P value	0.0077		P value	0.4159		P value	0.2418		P value
	314.992	326.327		109.412	80.2353		70.8974	87.6496		62.782	59.901		1.607	1.086		36.418	30.757																	P value summary	ns		P value summary	ns		P value summary	**		P value summary	ns		P value summary	ns		P value summary
	311.753	216.214		105.232	99.2329		76.8803	57.4359		72.864	68.731		1.149	1.467		49.249	43.211																	Significantly different (P < 0.05)?	No		Significantly different (P < 0.05)?	No		Significantly different (P < 0.05)?	Yes		Significantly different (P < 0.05)?	No		Significantly different (P < 0.05)?	No		Significantly different (P < 0.05)?
	300.418	256.697		104.824	101.824		80.4701	71.4957		75.025	81.566		1.531	1.149		65.854	28.493																	t, df	t=0.2881, df=10		t, df	t=0.3227, df=10		t, df	t=3.328, df=10		t, df	t=0.2181, df=10		t, df	t=0.7274, df=10		t, df
	300	140.959		119.058	109.412		27.5214	71.7949		252.912	78.626		1.455	1.531		45.475	45.405
	332.804	164.964		116.706	145.882		25.7265	23.9316		275.958	287.481		1.332	1.556		49.249	45.375
	314.992	221.032		94.8235	131.294		88.8462	28.1197		108.154	199.618		1.464	1.289																				AMLN-14 days
																																		HDL			LDL			TC			TG			FFA			Glycerol
																																		Unpaired t test			Unpaired t test			Unpaired t test			Unpaired t test			Unpaired t test			Unpaired t test
																																		P value	0.7098		P value	0.1142		P value	0.1643		P value	0.0234		P value	0.2907		P value
																																		P value summary	ns		P value summary	ns		P value summary	ns		P value summary	*		P value summary	ns		P value summary
	AMLN 14 days experiment																																	Significantly different (P < 0.05)?	No		Significantly different (P < 0.05)?	No		Significantly different (P < 0.05)?	No		Significantly different (P < 0.05)?	Yes		Significantly different (P < 0.05)?	No		Significantly different (P < 0.05)?
	Total cholestrol	mg/dL		HDL	mg/dL		LDL	mg/dL		Triglycerides	mg/dL		Free fatty acid	mEq/L		glycerol	mg/dL																	t, df	t=0.3811, df=12		t, df	t=1.269, df=12		t, df	t=1.018, df=12		t, df	t=2.238, df=11		t, df	t=0.5665, df=12		t, df
	IgG control	mouse mAb		IgG control	mouse mAb		IgG control	mouse mAb		IgG control	mouse mAb		IgG control	mouse mAb		IgG control	mouse mAb
	IgG control	mouse mAb		IgG control	mouse mAb		IgG control	mouse mAb		IgG control	mouse mAb		IgG control	mouse mAb		IgG control	mouse mAb
	173.427	265.562		124.273	112.9		50.7379	99.0874		34.794	25.768		1.202	1.438		14.297	15.58
	173.837	287.973		123.886	113.1		56.2524	75.4369		25.204	101.93*		1.077	1.612		16.88	33.987
	289.218	317.854		188.182	148.9		90.0777	111.32		25	27.46		1.234	1.675		17.78	15.57
	269.297	281.747		196.023	148.77		78.9126	95.8252		34.23	26.332		1.328	1.47		15.9	10.751
	276.767	311.629		138	177.204		111.728	110.913		29.52	25.204		1.47	1.36		13.006	10.424
	355.206	392.558		134.864	166.227		117.845	141.903		26.896	22.947		1.675	1.344		11.715	14.32
	224.475	162.221		97.2273	86.25		84.4078	72.1748		30.845	25.768		1.202	0.809		13.333	13.006
	Grubbs' outlier analysis with Q= 1% (outliers indicated in blue italics)
[truncated: 1 more columns]
