# Supplementary material for: Asprosin-neutralizing antibodies as a treatment for metabolic syndrome
Source: eLife. 2021 Apr 27;10:e63784. doi: 10.7554/eLife.63784 (PMC8102062; doi:10.7554/eLife.63784)
Supplement: Figure 5—source data 1. [file elife-63784-fig5-data1.xlsx]

## Sheet: Sheet1
	Figure 5: MRI study																				Statistical analysis
																					Figure 5: MRI analysis
	Body weight	IgG control							mouse mAb												Unpaired T test
		mouse#1	mouse#2	mouse#3	mouse#4	mouse#5	mouse#6	mouse#7	mouse#1	mouse#2	mouse#3	mouse#4	mouse#5	mouse#6	mouse#7	mouse#8					Body weight
	Pre treatment	53.93	44.62	44.41	44.18	41.1	46.63	45.03	43.93	43.24	48.58	44.13	43.08	38.65	48.24	41.16						P value	Mean of IgG control	Mean of mouse mAb	Difference	SE of difference	t ratio	df	q value
	post treatment	51.04	39.07	37.42	35.1	40.68	40.1	38.91	32.2	27.77	31.16	35.33	32.2	28.68	31.07	30.87					Pre treatment	0.350762	45.7	43.88	1.824	1.884	0.9679	13	0.177135
																					post treatment	0.000483	40.33	31.16	9.171	1.987	4.616	13	0.000488
	IP fat (mL)	IgG control							mouse mAb
		mouse#1	mouse#2	mouse#3	mouse#4	mouse#5	mouse#6	mouse#7	mouse#1	mouse#2	mouse#3	mouse#4	mouse#5	mouse#6	mouse#7	mouse#8					Lean mass
	Pre treatment	13.1	8.5	9.7	8.5	7.7	8.1	8.6	8	6.9	9.9	8	8.1	6.7	9.3	7.5						P value	Mean of IgG control	Mean of mouse mAb	Difference	SE of difference	t ratio	df	q value
	post treatment	11.3	6.8	5.1	5.6	7	5.5	5.3	1.4	2	2.9	3.6	5	3.2	2.4	2.8					Pre treatment	0.04996	31.04	26.02	5.025	2.306	2.179	12	0.10092
																					post treatment	0.937975	28.55	28.71	-0.1622	2.044	0.07933	13	0.947355
	Lean mass (g)	IgG control							mouse mAb
		mouse#1	mouse#2	mouse#3	mouse#4	mouse#5	mouse#6	mouse#7	mouse#1	mouse#2	mouse#3	mouse#4	mouse#5	mouse#6	mouse#7	mouse#8					Subcutaneous fat
	Pre treatment	36.3804	35.2815	27.1195	34.6485	35.5811	28.5533	25.0747	28.0438	26.8886	34.2769	24.9398	22.1816	26.2283	22.4967	23.0901						P value	Mean of IgG control	Mean of mouse mAb	Difference	SE of difference	t ratio	df	q value
	post treatment	31.8433	28.4653	21.9683	30.6306	21.9683	35.8497	29.0952	30.7971	24.8082	31.8772	31.4043	29.3142	26.1746	28.5093	26.7791					Pre treatment	0.168449	9.171	8.05	1.121	0.7689	1.458	13	0.085067
																					post treatment	0.000859	6.657	2.914	3.743	0.8699	4.303	13	0.000868
	subcutaneous fat (mL)	IgG control							mouse mAb												Intra peritoneal fat
		mouse#1	mouse#2	mouse#3	mouse#4	mouse#5	mouse#6	mouse#7	mouse#1	mouse#2	mouse#3	mouse#4	mouse#5	mouse#6	mouse#7	mouse#8						P value	Mean of IgG control	Mean of mouse mAb	Difference	SE of difference	t ratio	df	q value
	Pre treatment	29.2	20.6	22.3	19.5	18.7	19.8	20.9	16.1	17.8	20.7	15.7	19.1	15.6	22.3	18.2					Pre treatment	0.048484	21.57	18.19	3.384	1.554	2.177	13	0.024484
	post treatment	28.1	19.2	16.1	14.6	19.3	14.6	16.4	3.3	3.5	5.2	7.2	6.3	4.6	5.1	6.6					post treatment	4e-06	18.33	5.229	13.1	1.745	7.509	13	4e-06
