# Supplementary material for: Asprosin-neutralizing antibodies as a treatment for metabolic syndrome
Source: eLife. 2021 Apr 27;10:e63784. doi: 10.7554/eLife.63784 (PMC8102062; doi:10.7554/eLife.63784)
Supplement: Figure 6—source data 1. [file elife-63784-fig6-data1.xlsx]

## Sheet: Sheet1
	Figure 6
	Body weight change
		Baseline BW (g)	24 post injection (g)	BW change			Glucose Tolerance test																							Statistical analysis
	IgG control					Time (min)	IgG control					Mouse mAb					Rabbit mAb					Human mAb								Figure 6
	1	35.7	35.7	0		0	199	195	214	278	185	195	295	241	148	159	185	210	159	273	192	239	216	237	181	201
	2	42.1	41.9	-0.2		15	574	501	423	508	500	315	273	426	361	384	355	413	417	426	303	386	343	302	201	390				Glucose totlerance test (2 way anova)
	3	41.1	41.3	0.2		30	576	498	423	542	453	251	321	462	363	351	297	439	343	532	214	364	352	276	280	423				mouse mAb								Unpaired t test	Food intake						Change in body weight
	4	41.3	41.4	0.1		60	572	241	235	311	376	231	243	339	337	292	288	379	311	423	177	295	303	223	234	349				ANOVA table	SS	DF	MS	F (DFn, DFd)	P value				Mouse mAb	Rabbit mAb	Human mAb			Unpaired t test	Mouse mAb	Rabbit mAb	Human mAb
	5	54.9	54.2	-0.7		120	184	149	117	169	224	259	176	174	156	229	175	200	232	259	138	214	190	189	150	305				time x mouse antibody	66617	4	16654	F (4, 32) = 4.685	P=0.0043				vs.	vs.	vs.				vs.	vs.	vs.
																														time	523673	4	130918	F (2.221, 17.77) = 36.83	P<0.0001				IgG control	IgG control	IgG control				IgG control	IgG control	IgG control
						24 h food intake								Epitope competition assay																mouse antibody	55511	1	55511	F (1, 8) = 6.171	P=0.0379			P value	0.0052	0.0436	0.002			P value	0.0284	0.0021	0.0032
	mouse mAb						IgG control	Mouse mAb	Rabbit mAb	Human mAb				Mouse + Rabbit	Mouse + Human	Rabbit + Human														Subject	71964	8	8995	F (8, 32) = 2.531	P=0.0295			P value summary	**	*	**			P value summary	*	**	**
	1	37.5	37.2	-0.3			2.9	2.9	3.1	2.6				0.285	0.064	0.352														Residual	113754	32	3555					Significantly different (P < 0.05)?	Yes	Yes	Yes			Significantly different (P < 0.05)?	Yes	Yes	Yes
	2	50.9	50.4	-0.5			3.2	2.7	2.9	2.5				0.324	0.066	0.446																						One- or two-tailed P value?	Two-tailed	Two-tailed	Two-tailed			One- or two-tailed P value?	Two-tailed	Two-tailed	Two-tailed
	3	48.1	47.3	-0.8			3.6	2.8	3.1	2.8																				Glucose totlerance test (2 way anova)								t, df	t=3.807, df=8	t=2.393, df=8	t=4.491, df=8			t, df	t=2.668, df=8	t=4.447, df=8	t=4.157, df=8
	4	52.4	51.1	-1.3			3.3	2.9	2.4	2.8																				rabbit mAb
	5	47.4	46.6	-0.8			3.3	2.7	2.2	2.3																				ANOVA table	SS	DF	MS	F (DFn, DFd)	P value
																														time x Rabbit antibody	50698	4	12674	F (4, 32) = 4.258	P=0.0071
																														time	581153	4	145288	F (4, 32) = 48.81	P<0.0001
	Rabbit mAb					anti-asprosin mAb half life experiment																								Rabbit antibody	34165	1	34165	F (1, 8) = 1.891	P=0.2063
	1	53.7	52.6	-1.1		time (h)	WT DIO		NPS NC			time (h)	WT DIO		NPS NC			time (h)	WT DIO		NPS NC									Subject	144512	8	18064	F (8, 32) = 6.069	P<0.0001
	2	51.6	50.5	-1.1		2	0.341667	0.354667	0.331667	0.347667		2	0.528667	0.642667	0.747667	0.641667		2	0.629667	0.609667	0.699667									Residual	95245	32	2976
	3	51.7	51.1	-0.6		6	0.381667	0.415667	0.365667	0.383667		6	0.582667	0.744667	0.764667	0.616667		6	0.634667	0.594667	0.672667
	4	48.5	47.5	-1		24	0.375667	0.351667	0.312667	0.310667		24	0.492667	0.644667	0.570667	0.555667		24	0.586667	0.604667	0.542667									Glucose totlerance test (2 way anova)
	5	50.6	49.7	-0.9		96	0.434667	0.351667	0.366667	0.381667		96	0.535667	0.673667	0.555667	0.565667		96	0.522667	0.271667	0.562667									human mAb
						336	0.090667	0.198667	0.178667	0.140667		336	-0.00333	0.011667	0.003667	0.005667		336	-0.00433	0.013667	-0.00533									ANOVA table	SS	DF	MS	F (DFn, DFd)	P value
						504	0.115667	0.010667	0.083667	0.102667		504	-0.00433	-0.00533	-0.00433	-0.00533		504	0.024667	-0.00433	-0.00433									Time x human antibody	91738	4	22934	F (4, 32) = 8.994	P<0.0001
	Human mAb																													Time	461356	4	115339	F (2.058, 16.46) = 45.23	P<0.0001
	1	49.6	48.6	-1																										human antibody	65088	1	65088	F (1, 8) = 5.197	P=0.0521
	2	46	45.3	-0.7																										Subject	100194	8	12524	F (8, 32) = 4.911	P=0.0005
	3	46	45.2	-0.8																										Residual	81600	32	2550
	4	50.2	49.2	-1
	5	49.3	48.6	-0.7
																														Mouse mAb half life analysis				Rabbit mAb half life analysis				Human mAb half life analysis						Affinity analysis
																														One phase decay				One phase decay				One phase decay						Mouse mAb
																														Best-fit values				Best-fit values				Best-fit values						KD= 0.48±0.02 (nM)
	mouse mAb Kd analysis									rabbit mAb Kd analysis									human mAb Kd analysis											Y0	= 100.0	= 100.0		Y0	= 100.0	= 100.0		Y0	= 100.0	= 100.0				Kon(1/Ms)= (1.45±0.003) E+05
	Time	100	33.33333	11.11111	3.703704	1.234568	0.411523	0.137174		Time	300	100	33.33333	11.11111	3.703704	1.234568	0.411523		Time	300	100	33.33333	11.11111	3.703704	1.234568	0.411523				Plateau	= 0.000	= 0.000		Plateau	= 0.000	= 0.000		Plateau	= 0.000	= 0.000				Kdis(1/s) = (6.67±0.23) E-05
	0	0.009957	-0.00147	-7.9e-05	-0.00768	-0.00226	-0.00264	0.000627		0	0.026689	0.008383	-0.00729	-0.01029	0.002974	3.95e-05	0.003749		0	0.066392	0.049669	0.025163	0.005822	0.055961	0.018002	0.008511				K	0.002765	0.002356		K	0.00487	0.005411		K	0.005999	0.005589				R2=0.9974
	0.2	0.014073	5.28e-05	-2.9e-05	-0.00738	-0.00239	-0.00231	0.000386		0.2	0.038701	0.013212	-0.00473	-0.00841	0.003579	0.000667	0.004939		0.2	0.090711	0.058038	0.02922	0.007836	0.055945	0.018794	0.008612				Half Life	250.7	294.1		Half Life	142.3	128.1		Half Life	115.5	124
	0.4	0.019415	0.002086	0.000343	-0.00696	-0.00226	-0.00156	0.000265		0.4	0.052874	0.019173	-0.00191	-0.00687	0.004421	0.001604	0.006235		0.4	0.1196	0.068188	0.033384	0.009406	0.056017	0.019424	0.008487				Tau	361.6	424.4		Tau	205.4	184.8		Tau	166.7	178.9
	0.6	0.025644	0.004367	0.001252	-0.00614	-0.00193	-0.00042	0.000701		0.6	0.06981	0.025898	0.001486	-0.00498	0.00584	0.002375	0.00726		0.6	0.153461	0.080341	0.03917	0.011975	0.056519	0.020812	0.008833				Span	= 100.0	= 100.0		Span	= 100.0	= 100.0		Span	= 100.0	= 100.0				Human mAb
	0.8	0.032714	0.006505	0.001786	-0.00589	-0.00202	7.43e-05	0.000755		0.8	0.088402	0.033169	0.004202	-0.00377	0.006531	0.002985	0.008486		0.8	0.191226	0.093911	0.045532	0.015014	0.056899	0.022076	0.009138				Std. Error				Std. Error				Std. Error						KD= 14.4±0.24 (nM)
	1	0.040452	0.009064	0.002762	-0.00534	-0.0019	0.001276	0.001072		1	0.109191	0.041338	0.007415	-0.00228	0.007	0.003728	0.009312		1	0.233131	0.109263	0.052419	0.018693	0.057649	0.023661	0.009829				K	0.0005323	0.0003455		K	0.00128	0.001064		K	0.001077	0.001568				Kon(1/Ms)= (6.76±0.07) E+04
	1.2	0.049475	0.012322	0.004365	-0.00408	-0.00136	0.002547	0.001691		1.2	0.13119	0.049786	0.010534	-0.00084	0.007642	0.004331	0.009973		1.2	0.277344	0.124955	0.05968	0.022328	0.058309	0.024801	0.01003				95% CI (profile likelihood)				95% CI (profile likelihood)				95% CI (profile likelihood)						Kdis(1/s) = (9.71±0.13) E-04
	1.4	0.058312	0.01535	0.005734	-0.0032	-0.00141	0.00345	0.002272		1.4	0.154415	0.058889	0.013479	0.000523	0.008377	0.005103	0.010595		1.4	0.323818	0.141555	0.067463	0.025906	0.059175	0.026153	0.010226				K	0.001839 to 0.004124	0.001710 to 0.003204		K	0.003039 to 0.008059	0.003780 to 0.007941		K	0.004288 to 0.008563	0.003095 to 0.01081				R2=0.936
	1.6	0.067467	0.018034	0.00659	-0.00279	-0.00154	0.004314	0.002595		1.6	0.178295	0.067797	0.016431	0.001335	0.008946	0.005356	0.010493		1.6	0.370907	0.158855	0.075262	0.029645	0.059594	0.027646	0.010654				Half Life	168.1 to 376.9	216.3 to 405.4		Half Life	86.01 to 228.1	87.29 to 183.4		Half Life	80.95 to 161.6	64.12 to 224.0
	1.8	0.07711	0.021157	0.007671	-0.00215	-0.00105	0.005509	0.003675		1.8	0.203017	0.077305	0.019588	0.002072	0.009915	0.005641	0.010567		1.8	0.418149	0.176527	0.083194	0.033813	0.060338	0.02909	0.010829				Tau	242.5 to 543.7	312.1 to 584.8		Tau	124.1 to 329.0	125.9 to 264.6		Tau	116.8 to 233.2	92.51 to 323.1
	2	0.086582	0.023756	0.009065	-0.00161	-0.00081	0.006493	0.004642		2	0.226633	0.086286	0.022082	0.002178	0.009978	0.005409	0.010392		2	0.463923	0.193835	0.091024	0.038018	0.061219	0.030355	0.011332				Goodness of Fit				Goodness of Fit				Goodness of Fit						Rabbit mAb
	2.2	0.095366	0.026312	0.009994	-0.001	-0.0009	0.007423	0.005295		2.2	0.249125	0.09491	0.024567	0.002433	0.010175	0.004843	0.009664		2.2	0.507115	0.210622	0.098151	0.041815	0.062386	0.031362	0.011892				Degrees of Freedom	11	11		Degrees of Freedom	11	11		Degrees of Freedom	11	5				KD= < 0.01 (nM)
	2.4	0.104287	0.029563	0.011876	6.83e-05	-0.00059	0.008621	0.006662		2.4	0.272152	0.104224	0.027853	0.00317	0.010875	0.004766	0.009574		2.4	0.550105	0.22752	0.105654	0.046445	0.063528	0.032718	0.012442				R squared	0.8259	0.8644		R squared	0.8418	0.9148		R squared	0.9354	0.9197				Kon(1/Ms)= (1.11±0.004) E+05
	2.6	0.112819	0.032565	0.013346	0.000805	-0.00026	0.008926	0.007264		2.6	0.294532	0.113022	0.030357	0.003989	0.011219	0.004808	0.009518		2.6	0.592106	0.244391	0.112642	0.050773	0.065143	0.033592	0.012801				Sum of Squares	2444	1397		Sum of Squares	3700	1944		Sum of Squares	1526	882				Kdis(1/s) <1x10-7
	2.8	0.121459	0.035968	0.01523	0.001757	0.000536	0.009957	0.00809		2.8	0.317183	0.122079	0.033565	0.005208	0.012095	0.005176	0.009437		2.8	0.633163	0.260264	0.119208	0.05466	0.066115	0.033835	0.013369				Sy.x	14.91	11.27		Sy.x	18.34	13.29		Sy.x	11.78	13.28				R2=0.9908
	3	0.130178	0.038925	0.016624	0.002539	0.000839	0.010615	0.00807		3	0.338938	0.130259	0.035805	0.00575	0.012032	0.004698	0.0088		3	0.67426	0.276194	0.125931	0.058572	0.06706	0.034693	0.013813
	3.2	0.13895	0.042027	0.018348	0.00352	0.001376	0.011507	0.009051		3.2	0.359905	0.138846	0.038055	0.006304	0.012498	0.004225	0.0087		3.2	0.714565	0.292227	0.132052	0.062669	0.067994	0.035348	0.014479
	3.4	0.14742	0.044983	0.019935	0.003843	0.001589	0.012271	0.009335		3.4	0.381365	0.147966	0.040692	0.007137	0.012866	0.003875	0.008664		3.4	0.753606	0.307547	0.138468	0.066306	0.068881	0.036265	0.014946
	3.6	0.155757	0.047788	0.021025	0.004303	0.001446	0.012857	0.009455		3.6	0.402969	0.157223	0.044145	0.008854	0.014046	0.004553	0.009329		3.6	0.791759	0.323	0.144636	0.069866	0.070164	0.036918	0.015428
	3.8	0.163872	0.050268	0.02201	0.004744	0.001223	0.012844	0.009784		3.8	0.424796	0.165849	0.047582	0.009537	0.014642	0.004538	0.009633		3.8	0.82882	0.33788	0.151184	0.073523	0.070692	0.038016	0.015917
	4	0.172458	0.053288	0.023161	0.005673	0.001819	0.013859	0.010154		4	0.445848	0.17433	0.051121	0.01101	0.01484	0.004371	0.009583		4	0.86521	0.352486	0.157401	0.076749	0.071141	0.038768	0.016522
	4.2	0.180001	0.055856	0.023587	0.005586	0.001481	0.014238	0.009765		4.2	0.466703	0.183048	0.054738	0.012227	0.014695	0.004515	0.009952		4.2	0.901091	0.36776	0.164311	0.080282	0.072664	0.040252	0.017057
	4.4	0.188919	0.05895	0.02498	0.006145	0.002453	0.015734	0.010542		4.4	0.487618	0.192002	0.058035	0.013298	0.015897	0.005393	0.010801		4.4	0.936428	0.382538	0.17029	0.083352	0.073664	0.041329	0.017402
	4.6	0.196894	0.061758	0.026062	0.006852	0.003025	0.016575	0.011323		4.6	0.507869	0.200133	0.061124	0.014584	0.016643	0.005638	0.01126		4.6	0.971103	0.397926	0.176911	0.087258	0.07504	0.043113	0.018456
	4.8	0.204947	0.064059	0.026496	0.006664	0.002856	0.017044	0.011215		4.8	0.527642	0.208163	0.063824	0.015336	0.016703	0.005739	0.011494		4.8	1.00426	0.412471	0.183233	0.090276	0.075603	0.043943	0.018785
	5	0.212714	0.067012	0.027697	0.007374	0.003245	0.018	0.011643		5	0.547704	0.216796	0.067003	0.016889	0.017234	0.006458	0.012072		5	1.03692	0.426787	0.189209	0.093475	0.076366	0.044844	0.019185
	5.2	0.221037	0.07016	0.029122	0.008414	0.003671	0.018498	0.011971		5.2	0.567547	0.224867	0.06977	0.01802	0.017945	0.006851	0.012318		5.2	1.06843	0.440459	0.195036	0.096176	0.076572	0.045275	0.018669
	5.4	0.228017	0.072243	0.029732	0.00831	0.003104	0.018162	0.012109		5.4	0.587747	0.233257	0.072553	0.019299	0.019025	0.007455	0.01258		5.4	1.09936	0.454373	0.201328	0.098902	0.077051	0.046095	0.018334
	5.6	0.236048	0.074743	0.030867	0.008712	0.003012	0.019227	0.012234		5.6	0.607707	0.241037	0.075357	0.020326	0.019679	0.007313	0.012694		5.6	1.129	0.468325	0.206505	0.10186	0.077086	0.04632	0.017925
	5.8	0.243989	0.07748	0.031934	0.009255	0.00356	0.019858	0.012731		5.8	0.627517	0.249318	0.078278	0.02135	0.020259	0.007443	0.01335		5.8	1.15837	0.482363	0.212272	0.105209	0.077778	0.046526	0.017894
	6	0.251835	0.079918	0.03344	0.010104	0.00364	0.02035	0.012919		6	0.646966	0.257256	0.081199	0.02245	0.020832	0.007139	0.013736		6	1.1872	0.496146	0.217561	0.108201	0.078004	0.046527	0.017666
	6.2	0.26009	0.083419	0.034973	0.011312	0.003735	0.021293	0.013387		6.2	0.666597	0.265453	0.084659	0.023901	0.021639	0.006967	0.014096		6.2	1.21539	0.510354	0.222718	0.111128	0.078959	0.046879	0.017345
	6.4	0.2682	0.086721	0.036832	0.012808	0.004546	0.02169	0.014628		6.4	0.685977	0.273574	0.087736	0.024755	0.021955	0.006898	0.013741		6.4	1.2433	0.524217	0.228855	0.114753	0.079943	0.047621	0.017614
	6.6	0.276651	0.089818	0.038066	0.014274	0.005204	0.022215	0.014768		6.6	0.704869	0.281461	0.090351	0.025607	0.022077	0.0072	0.013566		6.6	1.26951	0.537561	0.234129	0.117349	0.080766	0.04789	0.017222
	6.8	0.284916	0.092857	0.039402	0.015412	0.005699	0.023312	0.015666		6.8	0.723909	0.28959	0.092988	0.02633	0.022346	0.007134	0.0136		6.8	1.29547	0.551034	0.240029	0.120572	0.081644	0.048205	0.017603
	7	0.292497	0.095147	0.040162	0.015979	0.004831	0.022864	0.015568		7	0.741831	0.2974	0.095427	0.026551	0.022452	0.006669	0.01319		7	1.32136	0.563969	0.245581	0.123444	0.082399	0.048633	0.017504
	7.2	0.300947	0.09848	0.042289	0.017047	0.005122	0.0235	0.016338		7.2	0.759717	0.305006	0.097703	0.026708	0.022663	0.006253	0.013092		7.2	1.3458	0.577227	0.251054	0.126015	0.083316	0.048709	0.017963
	7.4	0.309226	0.101029	0.043525	0.017749	0.005048	0.023741	0.01638		7.4	0.777846	0.312599	0.100577	0.027126	0.022712	0.005786	0.012714		7.4	1.36895	0.590151	0.256549	0.128525	0.084196	0.049151	0.018087
	7.6	0.317274	0.103852	0.04463	0.018604	0.00546	0.023658	0.016448		7.6	0.796197	0.320385	0.103929	0.027651	0.022935	0.005543	0.012712		7.6	1.39198	0.60326	0.261995	0.131437	0.085224	0.050065	0.018799
	7.8	0.325495	0.106425	0.045618	0.018792	0.005366	0.023584	0.016126		7.8	0.814131	0.3281	0.10666	0.028441	0.022891	0.005135	0.012536		7.8	1.41415	0.615634	0.26802	0.134553	0.085913	0.050332	0.019362
	8	0.333276	0.109036	0.046282	0.019079	0.005647	0.024166	0.016219		8	0.831623	0.335915	0.109667	0.02991	0.022911	0.005052	0.012763		8	1.43522	0.628509	0.273105	0.137451	0.086441	0.050883	0.019654
	8.2	0.340472	0.111091	0.046532	0.018721	0.005444	0.02419	0.01586		8.2	0.848713	0.343391	0.11212	0.030568	0.023085	0.005224	0.012413		8.2	1.45599	0.641359	0.278695	0.140104	0.087662	0.051625	0.019894
	8.4	0.349014	0.114067	0.047747	0.019354	0.006533	0.025256	0.016881		8.4	0.866095	0.351384	0.114987	0.031676	0.024063	0.005929	0.012764		8.4	1.47676	0.654123	0.284046	0.142892	0.088447	0.052626	0.020647
	8.6	0.356232	0.116427	0.047826	0.019144	0.006226	0.025069	0.016605		8.6	0.882818	0.358889	0.117936	0.03272	0.02455	0.006161	0.01267		8.6	1.49612	0.667335	0.289389	0.14534	0.089523	0.053602	0.021229
	8.8	0.363912	0.118827	0.048663	0.018876	0.006102	0.025065	0.016481		8.8	0.899664	0.366635	0.120261	0.033538	0.024923	0.006144	0.012715		8.8	1.51548	0.680068	0.295402	0.148183	0.09038	0.054371	0.021835
	9	0.371337	0.121514	0.04959	0.019261	0.006191	0.02473	0.016561		9	0.916845	0.374547	0.122778	0.034607	0.025044	0.00701	0.013398		9	1.53391	0.692076	0.300642	0.151082	0.091077	0.055035	0.022158
	9.2	0.378945	0.124059	0.050969	0.019519	0.005701	0.024733	0.016441		9.2	0.933621	0.38188	0.125144	0.035662	0.025229	0.007335	0.0135		9.2	1.55171	0.704284	0.305695	0.153374	0.091565	0.055432	0.022094
	9.4	0.386144	0.126772	0.051961	0.019532	0.005263	0.024651	0.016854		9.4	0.950448	0.389958	0.12771	0.037258	0.025946	0.007914	0.014021		9.4	1.56906	0.716459	0.311327	0.156171	0.092505	0.055939	0.022704
	9.6	0.3942	0.129586	0.053434	0.020107	0.005343	0.02572	0.01671		9.6	0.966698	0.39734	0.130658	0.038225	0.02617	0.008147	0.014137		9.6	1.58581	0.728381	0.315879	0.158936	0.093252	0.055919	0.022956
	9.8	0.402196	0.132696	0.054865	0.020827	0.005947	0.026611	0.016775		9.8	0.982956	0.405032	0.133112	0.039516	0.026536	0.008363	0.014647		9.8	1.60233	0.74037	0.321032	0.161941	0.094005	0.056175	0.02339
	10	0.410316	0.135695	0.056005	0.021868	0.005978	0.027574	0.017084		10	0.999568	0.412606	0.136037	0.04079	0.02699	0.00843	0.014945		10	1.618	0.751886	0.325702	0.164057	0.094122	0.056206	0.022904
	10.2	0.418509	0.138735	0.057207	0.02306	0.006062	0.028417	0.017468		10.2	1.01534	0.420331	0.138867	0.041973	0.026873	0.008566	0.014693		10.2	1.63317	0.763391	0.330774	0.166643	0.094791	0.056894	0.023139
	10.4	0.426167	0.141634	0.057832	0.023666	0.006373	0.028767	0.017894		10.4	1.03094	0.428177	0.141502	0.043089	0.026792	0.008586	0.01423		10.4	1.64821	0.774531	0.336065	0.169299	0.09558	0.057093	0.023425
	10.6	0.433977	0.144169	0.058603	0.024579	0.006267	0.029362	0.017971		10.6	1.04653	0.435899	0.144578	0.044099	0.027063	0.008709	0.014508		10.6	1.66216	0.785439	0.341049	0.171684	0.09622	0.057546	0.02311
	10.8	0.44151	0.146835	0.059348	0.024899	0.00597	0.029752	0.018243		10.8	1.06225	0.443605	0.147755	0.045191	0.027456	0.008415	0.014622		10.8	1.67625	0.796635	0.346078	0.174153	0.097021	0.057723	0.023195
	11	0.448617	0.149224	0.060266	0.025018	0.005589	0.029456	0.017993		11	1.07789	0.451319	0.15064	0.046206	0.028472	0.008523	0.014621		11	1.68963	0.807495	0.350704	0.1763	0.097642	0.057698	0.023483
	11.2	0.456317	0.151852	0.06133	0.02563	0.005932	0.029872	0.017924		11.2	1.09301	0.458243	0.153313	0.046563	0.028254	0.007958	0.014432		11.2	1.70226	0.818411	0.355729	0.178724	0.09842	0.058281	0.023865
	11.4	0.463598	0.153811	0.061659	0.025838	0.005397	0.029513	0.01766		11.4	1.10825	0.466048	0.156562	0.047793	0.02934	0.008203	0.014741		11.4	1.71456	0.829156	0.360576	0.181132	0.098709	0.058508	0.023505
	11.6	0.47084	0.155976	0.06222	0.026016	0.005405	0.029489	0.017493		11.6	1.12376	0.474134	0.159737	0.049123	0.030022	0.008617	0.015079		11.6	1.72732	0.84025	0.365939	0.184026	0.099523	0.059502	0.024123
	11.8	0.477835	0.157841	0.062303	0.025883	0.005095	0.029338	0.017103		11.8	1.1382	0.481411	0.162344	0.050533	0.030347	0.008754	0.014731		11.8	1.73925	0.851333	0.37083	0.18656	0.100019	0.059342	0.023992
	12	0.484962	0.160325	0.062615	0.026174	0.005277	0.029522	0.017021		12	1.15359	0.488975	0.165463	0.052244	0.03156	0.009327	0.015094		12	1.75047	0.8619	0.375125	0.188683	0.100138	0.059509	0.023646
	12.2	0.492288	0.162893	0.063281	0.026778	0.005605	0.029559	0.016769		12.2	1.16772	0.496119	0.167704	0.052929	0.032141	0.009397	0.015111		12.2	1.76162	0.872218	0.379743	0.19016	0.100652	0.059887	0.023647
	12.4	0.499729	0.164879	0.063786	0.027131	0.006151	0.029194	0.016614		12.4	1.18239	0.503279	0.170686	0.053977	0.032601	0.009634	0.015026		12.4	1.77305	0.882745	0.38481	0.192625	0.101425	0.060619	0.024317
	12.6	0.507579	0.167375	0.064538	0.027523	0.006485	0.029378	0.016765		12.6	1.19655	0.510721	0.173211	0.05485	0.033108	0.009607	0.015448		12.6	1.78389	0.893585	0.390045	0.195167	0.102358	0.061315	0.024672
	12.8	0.515265	0.170228	0.065768	0.028237	0.006937	0.02934	0.016883		12.8	1.21056	0.518024	0.175418	0.055465	0.033294	0.009011	0.015574		12.8	1.79486	0.904133	0.395411	0.198179	0.10361	0.062195	0.025647
	13	0.523103	0.173304	0.06705	0.029318	0.007618	0.029736	0.017321		13	1.22501	0.525469	0.17863	0.05665	0.033895	0.009586	0.01601		13	1.80444	0.913762	0.400508	0.200443	0.104235	0.062528	0.025877
	13.2	0.53019	0.176038	0.068547	0.030067	0.007941	0.030179	0.017621		13.2	1.2386	0.53279	0.18131	0.057668	0.034335	0.009601	0.015973		13.2	1.81414	0.923788	0.405288	0.202732	0.104765	0.062569	0.025817
	13.4	0.538285	0.179536	0.070159	0.031058	0.009118	0.031145	0.018164		13.4	1.25305	0.540845	0.184371	0.059204	0.035502	0.010452	0.016744		13.4	1.82404	0.934155	0.410924	0.205599	0.106053	0.063515	0.026751
	13.6	0.546139	0.182044	0.071613	0.032022	0.00972	0.032351	0.018047		13.6	1.26666	0.547789	0.187392	0.060085	0.035895	0.01066	0.016557		13.6	1.83325	0.943583	0.415502	0.207634	0.107149	0.063594	0.026776
	13.8	0.554054	0.185388	0.073527	0.033197	0.010661	0.033488	0.018368		13.8	1.28012	0.554973	0.189872	0.061102	0.03606	0.010912	0.016839		13.8	1.84232	0.953497	0.420204	0.209922	0.107965	0.063677	0.026837
	14	0.561502	0.187675	0.074079	0.0338	0.010626	0.033367	0.0188		14	1.2935	0.562117	0.193037	0.061672	0.036382	0.011295	0.016848		14	1.85075	0.962892	0.425212	0.211718	0.108711	0.064257	0.027364
	14.2	0.569033	0.190559	0.075308	0.034547	0.010814	0.033588	0.019189		14.2	1.30668	0.569683	0.196157	0.062697	0.036402	0.011714	0.016448		14.2	1.85984	0.972167	0.43062	0.214826	0.109873	0.065069	0.028104
	14.4	0.576116	0.193785	0.07646	0.035366	0.01097	0.034222	0.019934		14.4	1.31942	0.57682	0.199604	0.063772	0.036534	0.011901	0.016242		14.4	1.86868	0.981809	0.435747	0.217353	0.111421	0.065693	0.02819
	14.6	0.583302	0.195906	0.077399	0.036295	0.010801	0.034416	0.01991		14.6	1.33218	0.584067	0.202432	0.064577	0.037165	0.011912	0.015958		14.6	1.8776	0.991234	0.44082	0.219989	0.112468	0.066438	0.028086
	14.8	0.59049	0.198587	0.078528	0.03633	0.0107	0.034829	0.019888		14.8	1.34513	0.591109	0.205675	0.065752	0.03729	0.011899	0.015925		14.8	1.886	1.00039	0.445329	0.221852	0.11331	0.06652	0.027785
	15	0.597182	0.200938	0.078938	0.036399	0.010278	0.034626	0.019998		15	1.35751	0.598128	0.208264	0.066362	0.037589	0.012132	0.015481		15	1.89381	1.00941	0.449651	0.224107	0.113663	0.066739	0.02765
	15.2	0.604391	0.20353	0.079789	0.037351	0.01029	0.035027	0.020103		15.2	1.36961	0.604761	0.210819	0.066839	0.037584	0.012041	0.015273		15.2	1.90145	1.01778	0.454125	0.226216	0.113919	0.06704	0.02741
	15.4	0.611151	0.205835	0.080661	0.03775	0.009393	0.034916	0.020466		15.4	1.38163	0.611826	0.213977	0.068037	0.038025	0.01291	0.015526		15.4	1.90916	1.02643	0.458237	0.228328	0.113949	0.066923	0.027191
	15.6	0.61715	0.207544	0.081263	0.037654	0.008668	0.034114	0.02		15.6	1.39356	0.618199	0.216559	0.068788	0.037723	0.012383	0.015222		15.6	1.91688	1.03527	0.462928	0.230694	0.114278	0.067482	0.027347
	15.8	0.623439	0.209914	0.0818	0.037787	0.008533	0.033617	0.019359		15.8	1.40553	0.624924	0.219257	0.070002	0.037971	0.012249	0.015289		15.8	1.92381	1.04363	0.466892	0.23283	0.114868	0.067466	0.027118
	16	0.630063	0.212514	0.083106	0.038494	0.008506	0.033477	0.019337		16	1.41766	0.632004	0.222011	0.071509	0.038761	0.012428	0.015646		16	1.93016	1.05126	0.470773	0.234188	0.114647	0.066937	0.026987
	16.2	0.636263	0.2145	0.083836	0.03897	0.008409	0.032944	0.019074		16.2	1.42915	0.638297	0.224069	0.072176	0.038643	0.012066	0.015738		16.2	1.9366	1.05916	0.474549	0.235516	0.114895	0.067039	0.027144
	16.4	0.642738	0.216501	0.084356	0.038744	0.008372	0.032834	0.018956		16.4	1.44091	0.645037	0.226851	0.072954	0.038866	0.012094	0.01569		16.4	1.94312	1.06674	0.47892	0.236987	0.114827	0.0672	0.027484
	16.6	0.64982	0.220169	0.08551	0.039438	0.008793	0.033665	0.019776		16.6	1.45313	0.652972	0.230376	0.074764	0.039869	0.0123	0.016478		16.6	1.94992	1.07501	0.483598	0.238893	0.115355	0.068056	0.027863
	16.8	0.656495	0.22315	0.086346	0.039913	0.008936	0.034072	0.019746		16.8	1.46542	0.660061	0.233248	0.076031	0.04061	0.012496	0.016761		16.8	1.95609	1.08269	0.487622	0.240418	0.115976	0.068414	0.027943
	17	0.6633	0.225785	0.087135	0.040321	0.009159	0.034264	0.020201		17	1.47709	0.666853	0.236126	0.0772	0.041184	0.013141	0.017049		17	1.9622	1.09051	0.492078	0.242255	0.116906	0.068836	0.02838
	17.2	0.670207	0.228492	0.088168	0.040829	0.009644	0.035057	0.02013		17.2	1.48876	0.674143	0.239201	0.078327	0.042245	0.013884	0.017478		17.2	1.96809	1.09825	0.496273	0.243577	0.117366	0.069233	0.028428
	17.4	0.677703	0.231412	0.08956	0.041501	0.010048	0.035584	0.020329		17.4	1.50051	0.681041	0.2419	0.079417	0.04304	0.014478	0.018228		17.4	1.97389	1.1059	0.500898	0.244755	0.118112	0.069862	0.028935
	17.6	0.684554	0.233487	0.0901	0.0423	0.010208	0.035732	0.020321		17.6	1.51095	0.687341	0.244326	0.080215	0.043197	0.014472	0.017675		17.6	1.97948	1.11361	0.504953	0.246272	0.119016	0.070063	0.029589
	17.8	0.69157	0.236182	0.091019	0.04269	0.010791	0.035692	0.020474		17.8	1.52182	0.6941	0.247204	0.08157	0.043891	0.014554	0.017915		17.8	1.98506	1.12126	0.509508	0.247947	0.119611	0.07036	0.029861
	18	0.698826	0.238937	0.091566	0.043521	0.01087	0.03582	0.020968		18	1.53282	0.701197	0.250068	0.082911	0.044425	0.014683	0.018393		18	1.99088	1.12888	0.514185	0.249779	0.120802	0.071176	0.030355
	18.2	0.70633	0.242066	0.092693	0.044447	0.011439	0.036781	0.02125		18.2	1.54391	0.708324	0.253137	0.084578	0.0448	0.01517	0.018222		18.2	1.99721	1.13666	0.519453	0.252533	0.122274	0.071973	0.03095
	18.4	0.713797	0.244795	0.093782	0.04524	0.011848	0.03744	0.021604		18.4	1.55429	0.71465	0.255635	0.085701	0.045325	0.014907	0.017584		18.4	2.00325	1.14457	0.524059	0.254226	0.123324	0.072524	0.030867
	18.6	0.7209	0.24732	0.094554	0.045351	0.011971	0.037195	0.021134		18.6	1.56487	0.720776	0.257427	0.086227	0.045005	0.014214	0.016892		18.6	2.00971	1.15199	0.528574	0.25634	0.12399	0.072693	0.031069
	18.8	0.728221	0.250567	0.095679	0.046025	0.012029	0.03786	0.021476		18.8	1.57536	0.726968	0.259792	0.087251	0.044979	0.013877	0.016811		18.8	2.01506	1.15866	0.532289	0.257699	0.124052	0.072403	0.030723
	19	0.734815	0.253158	0.09668	0.047149	0.012271	0.03834	0.02145		19	1.58575	0.733545	0.262145	0.088233	0.045079	0.013889	0.016552		19	2.0203	1.1657	0.536278	0.259855	0.12424	0.072346	0.030578
	19.2	0.741915	0.255834	0.098419	0.048079	0.012243	0.038962	0.022024		19.2	1.59614	0.740267	0.26461	0.089461	0.045481	0.014084	0.016812		19.2	2.02612	1.17282	0.540633	0.262068	0.124913	0.072571	0.030852
	19.4	0.747987	0.257798	0.099761	0.048391	0.011658	0.038828	0.021718		19.4	1.60611	0.746787	0.267179	0.090173	0.04558	0.013905	0.016638		19.4	2.03128	1.18024	0.544526	0.264206	0.12563	0.07293	0.03093
	19.6	0.754051	0.260046	0.100661	0.048682	0.011424	0.038721	0.021324		19.6	1.61634	0.753258	0.269599	0.091336	0.045721	0.013402	0.01625		19.6	2.03646	1.18726	0.548958	0.266305	0.126088	0.073249	0.030737
	19.8	0.760539	0.262827	0.101586	0.049011	0.011611	0.038986	0.021771		19.8	1.62618	0.760169	0.272336	0.092386	0.045839	0.013441	0.016345		19.8	2.04146	1.19423	0.552723	0.268459	0.12718	0.073831	0.030766
	20	0.766705	0.265436	0.102773	0.049337	0.011556	0.039302	0.022242		20	1.63667	0.766969	0.274785	0.093234	0.04611	0.013631	0.016293		20	2.04692	1.20144	0.556896	0.270117	0.127801	0.073582	0.031135
	20.2	0.772512	0.267892	0.102925	0.048751	0.011284	0.039281	0.021947		20.2	1.6469	0.773302	0.277145	0.093661	0.046072	0.013545	0.015974		20.2	2.05214	1.20807	0.561221	0.272281	0.128478	0.073995	0.031408
	20.4	0.778539	0.271033	0.103989	0.048838	0.011365	0.040088	0.022213		20.4	1.65696	0.780089	0.280013	0.094247	0.046608	0.014032	0.016154		20.4	2.05704	1.21453	0.56529	0.273725	0.128196	0.074383	0.030742
	20.6	0.785301	0.274347	0.10506	0.049812	0.011997	0.040769	0.022982		20.6	1.66737	0.787123	0.283436	0.095165	0.047246	0.014505	0.016536		20.6	2.06244	1.22145	0.569283	0.27537	0.128625	0.075201	0.030682
	20.8	0.791343	0.27666	0.105241	0.049605	0.011716	0.040941	0.023432		20.8	1.67659	0.793208	0.28605	0.095334	0.046934	0.014292	0.015994		20.8	2.06666	1.22739	0.572287	0.276333	0.128583	0.07449	0.02985
	21	0.797611	0.279031	0.105823	0.049503	0.011513	0.040827	0.023246		21	1.68555	0.799097	0.288564	0.095202	0.047134	0.014203	0.015847		21	2.07192	1.2341	0.576395	0.278207	0.129559	0.075156	0.030819
	21.2	0.804535	0.28176	0.10706	0.050055	0.011955	0.041492	0.02323		21.2	1.69501	0.805545	0.291393	0.095748	0.047533	0.014265	0.016037		21.2	2.076	1.2398	0.580165	0.279351	0.129047	0.075218	0.030606
	21.4	0.810945	0.284088	0.107669	0.050509	0.011826	0.041191	0.023213		21.4	1.70447	0.811376	0.29394	0.096472	0.047511	0.013886	0.016287		21.4	2.08042	1.24582	0.584035	0.281439	0.129468	0.076025	0.030953
	21.6	0.81739	0.286005	0.108229	0.050879	0.012011	0.040968	0.022937		21.6	1.7138	0.818171	0.29689	0.097957	0.048343	0.014487	0.016595		21.6	2.08459	1.25185	0.587586	0.283444	0.130071	0.076337	0.031204
	21.8	0.823585	0.288609	0.108898	0.050806	0.012545	0.040912	0.02297		21.8	1.72351	0.824867	0.299885	0.099482	0.049058	0.014772	0.01736		21.8	2.08905	1.25761	0.591371	0.284969	0.130288	0.076839	0.030959
	22	0.830436	0.291334	0.11045	0.051744	0.013055	0.041402	0.023301		22	1.7329	0.831557	0.302839	0.101087	0.049695	0.015613	0.01803		22	2.09333	1.26363	0.595377	0.287054	0.131288	0.077765	0.031513
	22.2	0.837119	0.293994	0.112055	0.052399	0.013676	0.041931	0.023386		22.2	1.74226	0.837459	0.305627	0.102314	0.050164	0.015963	0.017843		22.2	2.09814	1.26975	0.600045	0.289792	0.132519	0.078864	0.032621
	22.4	0.843375	0.296562	0.113163	0.052881	0.013791	0.041754	0.023528		22.4	1.75068	0.843184	0.308112	0.1033	0.050384	0.015924	0.017935		22.4	2.10277	1.2755	0.604362	0.291587	0.133149	0.079329	0.032641
	22.6	0.849295	0.299543	0.114609	0.053474	0.014328	0.041482	0.023089		22.6	1.75953	0.849116	0.311232	0.104885	0.051123	0.016173	0.018456		22.6	2.10717	1.28097	0.608466	0.293314	0.133462	0.079493	0.03286
	22.8	0.855921	0.302151	0.116051	0.054467	0.014374	0.042219	0.023223		22.8	1.76876	0.856099	0.313991	0.106519	0.052438	0.017217	0.019494		22.8	2.1109	1.28653	0.612214	0.294921	0.13406	0.080039	0.03272
	23	0.862089	0.304707	0.11784	0.055296	0.014724	0.042489	0.023177		23	1.77758	0.862671	0.317109	0.107936	0.053177	0.017898	0.020072		23	2.11537	1.29263	0.616481	0.296835	0.135295	0.080961	0.033145
	23.2	0.868675	0.306895	0.119264	0.056071	0.014606	0.042865	0.022971		23.2	1.7866	0.869394	0.319891	0.109175	0.054151	0.018821	0.020401		23.2	2.11949	1.29818	0.62045	0.29863	0.135918	0.081875	0.033237
	23.4	0.874634	0.309114	0.120079	0.056712	0.014537	0.04302	0.023011		23.4	1.79426	0.875353	0.32244	0.110026	0.05443	0.018821	0.020559		23.4	2.12349	1.30368	0.624284	0.300792	0.136924	0.082386	0.033548
	23.6	0.880877	0.311636	0.12091	0.057196	0.014553	0.043027	0.023475		23.6	1.80295	0.882274	0.325303	0.111668	0.05509	0.019279	0.020962		23.6	2.12773	1.30892	0.62869	0.30266	0.138021	0.082877	0.034059
	23.8	0.887081	0.314057	0.121959	0.057631	0.014586	0.043212	0.023586		23.8	1.81103	0.888592	0.327492	0.112483	0.055309	0.018959	0.020711		23.8	2.13214	1.31423	0.632611	0.30469	0.13914	0.083284	0.034753
	24	0.892787	0.315991	0.123037	0.057713	0.014201	0.04315	0.023462		24	1.81963	0.895207	0.32969	0.113341	0.05588	0.019688	0.020984		24	2.13581	1.3198	0.636546	0.306452	0.139587	0.082831	0.03507
	24.2	0.898728	0.318587	0.123601	0.058036	0.014641	0.043604	0.023428		24.2	1.82726	0.90076	0.3319	0.113883	0.056334	0.019335	0.020744		24.2	2.13904	1.32457	0.640035	0.307891	0.139424	0.082536	0.034645
	24.4	0.905043	0.321459	0.125072	0.059214	0.015456	0.044251	0.02442		24.4	1.83525	0.906366	0.334153	0.114374	0.056165	0.019403	0.020524		24.4	2.14197	1.32906	0.643329	0.308158	0.138925	0.082314	0.033727
	24.6	0.911497	0.324581	0.125849	0.060167	0.015991	0.044538	0.025139		24.6	1.8431	0.912369	0.337067	0.115113	0.056441	0.019408	0.020163		24.6	2.14514	1.33387	0.646414	0.309156	0.139023	0.081838	0.033728
	24.8	0.91716	0.327048	0.125774	0.059872	0.015608	0.044381	0.025208		24.8	1.85079	0.918303	0.33949	0.115921	0.056592	0.01895	0.019852		24.8	2.14837	1.33883	0.649467	0.310419	0.139086	0.08153	0.034272
	25	0.923424	0.32903	0.126195	0.060199	0.015213	0.044342	0.024646		25	1.85895	0.923768	0.34195	0.116475	0.056598	0.018592	0.019465		25	2.15198	1.34343	0.653102	0.31186	0.139461	0.081726	0.034499
	25.2	0.929521	0.330913	0.12662	0.060565	0.014836	0.043882	0.024458		25.2	1.86723	0.929692	0.344495	0.117537	0.056851	0.018027	0.018888		25.2	2.15537	1.34797	0.656536	0.313317	0.139496	0.081617	0.034133
	25.4	0.935648	0.332969	0.126813	0.060934	0.014194	0.043377	0.024053		25.4	1.87579	0.935971	0.347144	0.118321	0.057311	0.018171	0.018956		25.4	2.15883	1.35284	0.660122	0.31493	0.139839	0.081992	0.03402
	25.6	0.941116	0.335203	0.127757	0.061377	0.013982	0.042827	0.024111		25.6	1.8834	0.942136	0.349671	0.119532	0.057976	0.018668	0.018365		25.6	2.16221	1.35743	0.663591	0.316354	0.139811	0.081726	0.033922
	25.8	0.946845	0.337916	0.128478	0.061714	0.014036	0.042865	0.024241		25.8	1.89087	0.947711	0.351624	0.120129	0.058246	0.018312	0.018171		25.8	2.16564	1.36247	0.667142	0.317992	0.140274	0.08256	0.034209
	26	0.952562	0.340128	0.129466	0.062203	0.01405	0.042744	0.024302		26	1.89785	0.953365	0.35436	0.120984	0.058304	0.018358	0.017981		26	2.16886	1.36709	0.670928	0.319677	0.141411	0.082798	0.034739
	26.2	0.958139	0.342689	0.13004	0.062658	0.014135	0.042464	0.024375		26.2	1.90552	0.959233	0.356988	0.121893	0.058532	0.018215	0.018041		26.2	2.17282	1.37211	0.674758	0.321555	0.141953	0.082789	0.034937
	26.4	0.964056	0.345308	0.130851	0.063135	0.014586	0.042197	0.024474		26.4	1.91262	0.965317	0.359593	0.122637	0.059092	0.018195	0.018328		26.4	2.17607	1.37682	0.678361	0.323121	0.142316	0.083376	0.035099
	26.6	0.970028	0.34825	0.13199	0.063324	0.014898	0.042271	0.023898		26.6	1.92077	0.97147	0.36218	0.123835	0.060058	0.018821	0.018673		26.6	2.17942	1.38178	0.681909	0.324353	0.142716	0.083673	0.035479
	26.8	0.975755	0.350187	0.132665	0.063191	0.014411	0.041893	0.023538		26.8	1.92838	0.977855	0.364507	0.124916	0.060802	0.019349	0.019107		26.8	2.18315	1.38684	0.685527	0.32629	0.143482	0.084736	0.035846
	27	0.981674	0.352788	0.133849	0.063552	0.014688	0.042091	0.023637		27	1.93544	0.983795	0.367213	0.126001	0.061294	0.019323	0.019325		27	2.18727	1.39142	0.688933	0.328353	0.14421	0.085481	0.036199
	27.2	0.987331	0.355488	0.134886	0.063921	0.015289	0.042619	0.023874		27.2	1.94295	0.990068	0.370279	0.12739	0.061953	0.020366	0.019862		27.2	2.19067	1.39623	0.6928	0.330477	0.144539	0.086143	0.036359
	27.4	0.993111	0.358262	0.135601	0.064077	0.015335	0.042781	0.024259		27.4	1.94931	0.995692	0.372241	0.128584	0.062612	0.0204	0.020409		27.4	2.19413	1.40107	0.696229	0.332397	0.145263	0.086488	0.036972
	27.6	0.999062	0.361171	0.137256	0.065033	0.016217	0.043566	0.024271		27.6	1.95674	1.00179	0.374229	0.12968	0.063018	0.020322	0.020456		27.6	2.19722	1.40549	0.699789	0.333694	0.146182	0.086586	0.037688
	27.8	1.00505	0.364149	0.138971	0.065492	0.017004	0.044519	0.02476		27.8	1.96331	1.00724	0.376608	0.130553	0.062872	0.020212	0.020041		27.8	2.20022	1.40986	0.70318	0.335363	0.146513	0.086806	0.037716
	28	1.0105	0.366786	0.139762	0.065611	0.017545	0.044647	0.025156		28	1.97032	1.01285	0.379237	0.131752	0.063181	0.020438	0.020372		28	2.20304	1.41454	0.705941	0.336962	0.147282	0.087198	0.037585
	28.2	1.01631	0.369771	0.141149	0.06639	0.018813	0.045689	0.025676		28.2	1.97656	1.01793	0.381525	0.132275	0.062934	0.019538	0.020127		28.2	2.20589	1.41878	0.70918	0.338489	0.148087	0.087814	0.03743
	28.4	1.02201	0.372389	0.141983	0.066907	0.019446	0.046074	0.026172		28.4	1.98376	1.02338	0.38419	0.133243	0.062802	0.019723	0.02		28.4	2.20864	1.42291	0.712906	0.340056	0.149003	0.088406	0.037219
	28.6	1.02818	0.37524	0.14291	0.067375	0.019763	0.04688	0.026209		28.6	1.99089	1.02961	0.387486	0.134823	0.063511	0.01983	0.020349		28.6	2.2116	1.42733	0.715517	0.341619	0.149857	0.088295	0.037098
	28.8	1.03429	0.37813	0.143485	0.06796	0.020123	0.04743	0.026957		28.8	1.99762	1.03524	0.390261	0.135754	0.06358	0.019384	0.020107		28.8	2.21492	1.43123	0.718545	0.342796	0.150244	0.088578	0.036799
	29	1.04011	0.380124	0.143992	0.06828	0.019889	0.047675	0.026896		29	2.00476	1.04093	0.393642	0.137365	0.06424	0.019655	0.019899		29	2.21805	1.43499	0.721924	0.343794	0.15083	0.088493	0.035586
	29.2	1.04606	0.382537	0.145108	0.069065	0.020246	0.048031	0.027124		29.2	2.01157	1.0472	0.39626	0.138657	0.064759	0.019844	0.0203		29.2	2.22126	1.43962	0.725617	0.344889	0.151796	0.089276	0.035512
	29.4	1.05174	0.385202	0.14596	0.069581	0.020155	0.048318	0.02755		29.4	2.01842	1.05364	0.39937	0.13981	0.06542	0.020894	0.020806		29.4	2.22422	1.44362	0.729104	0.346259	0.152631	0.08971	0.035767
	29.6	1.05692	0.388098	0.147036	0.070166	0.020685	0.048787	0.027873		29.6	2.02464	1.05934	0.401913	0.141256	0.066149	0.021284	0.020687		29.6	2.22703	1.44713	0.731999	0.347292	0.152831	0.089777	0.035634
	29.8	1.06224	0.390336	0.147104	0.070425	0.020626	0.048973	0.027812		29.8	2.03119	1.06498	0.404071	0.141671	0.066033	0.021075	0.020808		29.8	2.22985	1.4508	0.73476	0.348199	0.153386	0.089598	0.035433
	30	1.06747	0.392658	0.147977	0.071265	0.020928	0.049153	0.027943		30	2.03746	1.07069	0.406744	0.142839	0.066586	0.021651	0.0212		30	2.23244	1.45418	0.737469	0.34885	0.154059	0.08923	0.035606
	30.2	1.07294	0.395375	0.149052	0.072366	0.020966	0.049506	0.028408		30.2	2.04441	1.0766	0.409347	0.144186	0.06732	0.022252	0.02147		30.2	2.23545	1.45763	0.740697	0.349974	0.154218	0.089381	0.035414
	30.4	1.07841	0.397811	0.149925	0.072811	0.021045	0.04957	0.028265		30.4	2.05065	1.08189	0.411957	0.144567	0.067542	0.022698	0.021314		30.4	2.23832	1.46082	0.74341	0.350887	0.15446	0.089768	0.035798
	30.6	1.0834	0.400073	0.150534	0.072661	0.020369	0.049533	0.027946		30.6	2.05743	1.08787	0.414075	0.145907	0.068505	0.023617	0.021826		30.6	2.24164	1.46507	0.746739	0.352031	0.155246	0.090124	0.036034
	30.8	1.08834	0.402048	0.151263	0.072802	0.020254	0.049506	0.0279		30.8	2.06329	1.09342	0.41667	0.14727	0.069171	0.023632	0.021945		30.8	2.24469	1.46852	0.749874	0.353701	0.155737	0.090652	0.036263
	31	1.09356	0.404824	0.152304	0.073289	0.020497	0.050165	0.028572		31	2.06954	1.09917	0.419219	0.148246	0.069579	0.024034	0.021979		31	2.24773	1.47233	0.753239	0.355299	0.156713	0.091274	0.037024
	31.2	1.09863	0.407819	0.153293	0.073632	0.020501	0.050418	0.02833		31.2	2.07583	1.10431	0.421266	0.148925	0.070111	0.02461	0.022131		31.2	2.25048	1.47627	0.756885	0.356602	0.157468	0.091733	0.037495
	31.4	1.10407	0.410086	0.154416	0.073811	0.020491	0.050929	0.027818		31.4	2.08165	1.10962	0.42279	0.149109	0.069959	0.023768	0.021411		31.4	2.25329	1.47992	0.760279	0.35821	0.158226	0.092124	0.037789
	31.6	1.10927	0.412734	0.155887	0.074361	0.020566	0.051331	0.02758		31.6	2.08809	1.1155	0.425735	0.149937	0.06997	0.023632	0.020758		31.6	2.2562	1.48364	0.763391	0.359858	0.15921	0.092369	0.038272
	31.8	1.1145	0.414897	0.157059	0.074348	0.020336	0.051381	0.02776		31.8	2.09443	1.12098	0.428652	0.150646	0.070164	0.023291	0.020641		31.8	2.25916	1.48714	0.766218	0.361761	0.159934	0.09255	0.038309
	32	1.11922	0.416465	0.157269	0.07406	0.020161	0.050773	0.027348		32	2.1002	1.126	0.431243	0.151858	0.070358	0.022729	0.0206		32	2.26236	1.49089	0.769362	0.364156	0.161531	0.09351	0.038891
	32.2	1.12429	0.418083	0.158212	0.07404	0.020139	0.050544	0.0271		32.2	2.10625	1.13156	0.433887	0.152059	0.070225	0.022661	0.020443		32.2	2.26513	1.49437	0.772571	0.36607	0.161953	0.093894	0.039151
	32.4	1.1292	0.42021	0.158378	0.073899	0.019825	0.050236	0.02679		32.4	2.11285	1.13673	0.436639	0.15316	0.070428	0.0227	0.020355		32.4	2.26812	1.49772	0.775583	0.367639	0.162511	0.093979	0.03923
	32.6	1.13405	0.422154	0.158755	0.073593	0.019515	0.04972	0.026205		32.6	2.11909	1.1427	0.440167	0.154431	0.070865	0.02291	0.01991		32.6	2.27106	1.50139	0.778417	0.369054	0.162719	0.094016	0.039127
	32.8	1.13873	0.424652	0.159229	0.073605	0.019206	0.049548	0.026007		32.8	2.12489	1.14795	0.442987	0.155551	0.071618	0.023333	0.019983		32.8	2.27412	1.50483	0.781923	0.370688	0.163254	0.094725	0.039156
	33	1.14374	0.426792	0.159784	0.073638	0.019183	0.049118	0.025638		33	2.13089	1.15333	0.445686	0.157141	0.072275	0.024361	0.020651		33	2.27666	1.50816	0.785254	0.371904	0.163421	0.095048	0.039268
	33.2	1.14834	0.428783	0.160278	0.073661	0.019468	0.048618	0.02532		33.2	2.13679	1.1588	0.448233	0.158198	0.072379	0.024633	0.020971		33.2	2.27857	1.51107	0.787902	0.373003	0.163307	0.095215	0.039189
	33.4	1.15307	0.43108	0.161075	0.073826	0.019417	0.048243	0.02543		33.4	2.14301	1.1643	0.450725	0.159007	0.073053	0.025205	0.02091		33.4	2.28126	1.51403	0.790743	0.374735	0.16352	0.095204	0.039354
	33.6	1.15774	0.433803	0.161802	0.074241	0.019216	0.048409	0.025372		33.6	2.14847	1.1695	0.453002	0.160081	0.073369	0.025517	0.021242		33.6	2.28337	1.51704	0.793314	0.375541	0.163127	0.09485	0.039023
	33.8	1.16239	0.436169	0.162367	0.074577	0.018752	0.048321	0.025408		33.8	2.15401	1.17489	0.455671	0.160849	0.073759	0.026035	0.021851		33.8	2.28585	1.52032	0.795828	0.376629	0.163764	0.094507	0.039112
	34	1.16763	0.438794	0.163975	0.075668	0.019222	0.048607	0.025746		34	2.15905	1.1801	0.458362	0.161774	0.074148	0.026357	0.022339		34	2.28777	1.52306	0.798566	0.377739	0.164263	0.09488	0.038691
	34.2	1.17281	0.44115	0.165013	0.076562	0.019188	0.049011	0.025874		34.2	2.16407	1.18504	0.460694	0.162501	0.074322	0.026986	0.022503		34.2	2.29015	1.52599	0.801781	0.378829	0.164376	0.094974	0.03857
	34.4	1.17838	0.44381	0.166322	0.077381	0.01983	0.049644	0.026361		34.4	2.16968	1.19019	0.463324	0.163485	0.074988	0.026874	0.022874		34.4	2.29206	1.52865	0.804233	0.379611	0.164149	0.094542	0.038731
	34.6	1.18371	0.44648	0.167726	0.078017	0.019956	0.050481	0.026672		34.6	2.17516	1.1958	0.465551	0.164331	0.075754	0.026832	0.023088		34.6	2.29456	1.53228	0.807142	0.381228	0.165267	0.095113	0.039318
	34.8	1.1892	0.449041	0.168903	0.078882	0.020502	0.051178	0.027198		34.8	2.18016	1.20084	0.468178	0.164951	0.076077	0.026846	0.023295		34.8	2.29649	1.53476	0.809652	0.382543	0.165571	0.095132	0.039188
	35	1.19481	0.451546	0.169822	0.079474	0.020548	0.051511	0.027409		35	2.18568	1.20611	0.470476	0.165512	0.076464	0.02699	0.02347		35	2.29906	1.53808	0.81304	0.384315	0.166445	0.095594	0.039557
	35.2	1.20027	0.45404	0.171119	0.079927	0.020468	0.052538	0.027351		35.2	2.19093	1.21084	0.472851	0.165769	0.076275	0.026558	0.023199		35.2	2.30132	1.54171	0.815675	0.386089	0.167263	0.095716	0.039647
	35.4	1.20544	0.455871	0.17217	0.079923	0.020414	0.05328	0.027139		35.4	2.19623	1.21649	0.475487	0.166633	0.076842	0.026288	0.023147		35.4	2.3039	1.54497	0.818703	0.388146	0.168102	0.09557	0.039633
	35.6	1.21069	0.458362	0.173344	0.080931	0.020529	0.053941	0.027416		35.6	2.20151	1.22139	0.478149	0.167932	0.077326	0.026427	0.023255		35.6	2.30679	1.54801	0.821086	0.3897	0.168481	0.095189	0.03961
	35.8	1.21529	0.460433	0.173844	0.080803	0.020733	0.053918	0.027667		35.8	2.20662	1.22646	0.480995	0.168954	0.07818	0.026514	0.023283		35.8	2.30958	1.55109	0.823883	0.391647	0.169264	0.09589	0.040188
	36	1.22	0.46247	0.174568	0.081023	0.02121	0.054003	0.027977		36	2.21175	1.23195	0.483677	0.17056	0.079069	0.026617	0.023555		36	2.3123	1.55456	0.827277	0.393782	0.170113	0.096868	0.04091
	36.2	1.22457	0.464926	0.175175	0.080884	0.021312	0.054212	0.027905		36.2	2.21709	1.23715	0.486275	0.170972	0.078906	0.026516	0.023369		36.2	2.31478	1.55737	0.830327	0.394939	0.170068	0.096943	0.040728
	36.4	1.22904	0.46759	0.176006	0.08091	0.02143	0.054841	0.028106		36.4	2.22195	1.24247	0.489123	0.172332	0.079556	0.026772	0.023212		36.4	2.31725	1.56038	0.833217	0.396617	0.170649	0.097446	0.041306
	36.6	1.23361	0.469843	0.176469	0.08097	0.021403	0.054726	0.027867		36.6	2.22684	1.24751	0.491573	0.173319	0.080076	0.027272	0.023001		36.6	2.31981	1.56334	0.836182	0.397554	0.171058	0.098002	0.041493
	36.8	1.2383	0.472749	0.177449	0.08128	0.021907	0.055259	0.028306		36.8	2.23162	1.25255	0.493892	0.174457	0.079923	0.027556	0.022776		36.8	2.32195	1.56594	0.838897	0.398401	0.171577	0.098619	0.041348
	37	1.243	0.475176	0.177897	0.08107	0.022294	0.054932	0.028367		37	2.23619	1.25723	0.495783	0.175141	0.079631	0.027506	0.022104		37	2.32386	1.56822	0.841711	0.399573	0.171737	0.098949	0.04138
	37.2	1.24676	0.477064	0.178584	0.081125	0.022543	0.054716	0.02799		37.2	2.24116	1.26255	0.49827	0.175992	0.080019	0.027492	0.021777		37.2	2.32605	1.57111	0.844027	0.400466	0.172422	0.099462	0.041231
	37.4	1.25133	0.479534	0.179686	0.081588	0.022375	0.054668	0.028319		37.4	2.24579	1.26839	0.501074	0.177163	0.08052	0.027948	0.021691		37.4	2.32928	1.57439	0.847462	0.402002	0.173036	0.100214	0.041416
	37.6	1.2555	0.482128	0.180626	0.081995	0.022149	0.054815	0.028446		37.6	2.25022	1.27406	0.503845	0.17887	0.080663	0.028429	0.022025		37.6	2.33173	1.57693	0.849547	0.402987	0.173187	0.100651	0.041793
	37.8	1.26039	0.484586	0.181682	0.082452	0.022329	0.054972	0.028844		37.8	2.25504	1.27943	0.506118	0.179853	0.080736	0.028858	0.02229		37.8	2.33459	1.57917	0.851663	0.403639	0.173475	0.101075	0.041262
	38	1.26589	0.487416	0.183009	0.083633	0.023244	0.055578	0.029737		38	2.25949	1.28443	0.508587	0.180754	0.080565	0.028706	0.021817		38	2.33699	1.5816	0.854321	0.404994	0.173848	0.101577	0.041397
	38.2	1.27084	0.489697	0.183988	0.084498	0.023235	0.055568	0.030019		38.2	2.26451	1.28905	0.510542	0.181688	0.08132	0.028821	0.021692		38.2	2.33973	1.58415	0.856964	0.405776	0.173957	0.101636	0.042165
	38.4	1.27598	0.492578	0.185213	0.085102	0.02362	0.055523	0.030419		38.4	2.26999	1.29409	0.513214	0.182757	0.082125	0.028309	0.021681		38.4	2.34231	1.58671	0.859623	0.407374	0.174693	0.102133	0.042799
	38.6	1.2806	0.495182	0.186202	0.085653	0.023616	0.055312	0.030543		38.6	2.27452	1.29858	0.515114	0.182954	0.082014	0.027822	0.021325		38.6	2.34501	1.58977	0.862057	0.409008	0.175541	0.102963	0.043259
	38.8	1.28521	0.497365	0.187015	0.086268	0.02379	0.054829	0.030444		38.8	2.27911	1.3028	0.517169	0.183413	0.082197	0.027364	0.021665		38.8	2.34712	1.59218	0.86429	0.410102	0.175851	0.10303	0.042976
	39	1.28996	0.499426	0.18782	0.086884	0.023603	0.054877	0.029856		39	2.28425	1.3074	0.519473	0.18455	0.082841	0.027421	0.022008		39	2.34956	1.59502	0.867423	0.411679	0.176737	0.103288	0.043448
	39.2	1.29467	0.501479	0.188858	0.087182	0.023781	0.055422	0.029738		39.2	2.28857	1.31184	0.52161	0.185216	0.083606	0.02715	0.022261		39.2	2.35202	1.59837	0.869906	0.41299	0.177561	0.103588	0.043837
	39.4	1.29912	0.503758	0.1898	0.08768	0.023897	0.055488	0.029599		39.4	2.29293	1.31668	0.523686	0.185976	0.084957	0.027107	0.022938		39.4	2.35472	1.60057	0.87212	0.41376	0.177965	0.103623	0.044018
	39.6	1.30376	0.506563	0.1912	0.088631	0.024499	0.055905	0.029791		39.6	2.29735	1.32106	0.526206	0.186859	0.085375	0.02683	0.023263		39.6	2.35706	1.60295	0.874215	0.414679	0.177962	0.10385	0.044234
	39.8	1.3079	0.508633	0.191989	0.088447	0.024536	0.055925	0.029612		39.8	2.30218	1.32601	0.528978	0.187812	0.085979	0.027117	0.023303		39.8	2.35892	1.60595	0.877113	0.415871	0.178702	0.1047	0.044785
	40	1.31268	0.510746	0.193524	0.089099	0.024582	0.055938	0.030141		40	2.30659	1.33061	0.53117	0.188569	0.08636	0.027166	0.024032		40	2.3609	1.60909	0.880118	0.417633	0.179147	0.105185	0.045415
	40.2	1.31742	0.513464	0.194838	0.089474	0.024743	0.056596	0.030434		40.2	2.31123	1.33481	0.533958	0.189098	0.086562	0.027435	0.024548		40.2	2.36339	1.61216	0.883304	0.418885	0.17996	0.10568	0.045521
	40.4	1.3217	0.515698	0.195869	0.089791	0.024719	0.056939	0.030486		40.4	2.31631	1.34016	0.536935	0.190519	0.087321	0.028408	0.024985		40.4	2.36551	1.61518	0.885996	0.419942	0.180581	0.10594	0.046088
	40.6	1.32579	0.517959	0.196697	0.090052	0.024659	0.056752	0.030151		40.6	2.32042	1.34424	0.539081	0.191029	0.087055	0.028366	0.02441		40.6	2.36792	1.61815	0.889374	0.421254	0.181758	0.106961	0.046856
	40.8	1.32938	0.519938	0.197057	0.08988	0.024374	0.056411	0.029839		40.8	2.32458	1.34912	0.541475	0.192209	0.086806	0.028254	0.023664		40.8	2.36974	1.62059	0.89201	0.422227	0.181986	0.106689	0.046757
	41	1.33326	0.521792	0.197069	0.089924	0.024055	0.056181	0.029352		41	2.32877	1.35352	0.544027	0.192856	0.087066	0.028582	0.023327		41	2.37226	1.62308	0.894753	0.423806	0.182632	0.107097	0.047289
	41.2	1.33696	0.524287	0.197963	0.090888	0.024244	0.056056	0.029051		41.2	2.33366	1.35849	0.54734	0.194591	0.08798	0.029266	0.023332		41.2	2.37476	1.62531	0.896564	0.42504	0.182739	0.107351	0.04705
	41.4	1.3415	0.526691	0.198721	0.091565	0.024096	0.056248	0.029427		41.4	2.33846	1.36417	0.550273	0.196276	0.088487	0.03008	0.0237		41.4	2.37721	1.62764	0.899388	0.426635	0.182583	0.107794	0.047116
	41.6	1.34595	0.528774	0.199462	0.091817	0.023946	0.056669	0.02974		41.6	2.34308	1.36902	0.552638	0.197719	0.088187	0.030296	0.023488		41.6	2.37936	1.62952	0.900897	0.42758	0.182593	0.107867	0.046613
	41.8	1.35042	0.531157	0.200171	0.092102	0.023973	0.056735	0.030368		41.8	2.34775	1.37378	0.554893	0.198893	0.088307	0.031039	0.023185		41.8	2.38172	1.6319	0.903068	0.428482	0.183048	0.107616	0.045917
	42	1.35519	0.533811	0.201217	0.092735	0.024664	0.056958	0.030919		42	2.35195	1.37832	0.557258	0.199702	0.088591	0.030905	0.022736		42	2.38378	1.6346	0.905788	0.430089	0.183837	0.107153	0.046151
	42.2	1.35888	0.535847	0.201531	0.09287	0.024449	0.056235	0.030581		42.2	2.35572	1.38229	0.559046	0.200456	0.08878	0.03073	0.022749		42.2	2.38565	1.63685	0.907981	0.431236	0.184343	0.107351	0.046132
	42.4	1.36279	0.538385	0.20218	0.09299	0.024739	0.056292	0.030453		42.4	2.3596	1.38677	0.560767	0.201712	0.089292	0.030539	0.022954		42.4	2.38749	1.63902	0.91021	0.432661	0.18512	0.107428	0.045762
	42.6	1.36664	0.540657	0.202615	0.092944	0.025033	0.056435	0.030766		42.6	2.36339	1.39112	0.562488	0.202221	0.088878	0.030299	0.023013		42.6	2.38892	1.64089	0.912622	0.433764	0.185546	0.107347	0.04523
	42.8	1.37098	0.542574	0.203261	0.093208	0.024943	0.056471	0.03009		42.8	2.36731	1.39583	0.564865	0.203487	0.089467	0.030397	0.023361		42.8	2.39084	1.64273	0.914019	0.434285	0.18615	0.106453	0.044598
	43	1.37565	0.54513	0.203762	0.093722	0.025467	0.057175	0.029957		43	2.37176	1.40121	0.567355	0.205003	0.090548	0.030692	0.023949		43	2.39244	1.64497	0.916646	0.435477	0.187149	0.106485	0.044516
	43.2	1.37976	0.547394	0.204787	0.09369	0.025925	0.057827	0.029979		43.2	2.37511	1.40604	0.569732	0.205664	0.091076	0.030529	0.024197		43.2	2.39408	1.64691	0.917992	0.436117	0.187477	0.106648	0.044046
	43.4	1.38405	0.549771	0.205967	0.093603	0.025964	0.057883	0.030033		43.4	2.37926	1.4111	0.57251	0.206763	0.091764	0.030559	0.024623		43.4	2.39551	1.64848	0.919462	0.436536	0.187835	0.106319	0.043501
	43.6	1.38802	0.551825	0.207059	0.093558	0.025948	0.058249	0.029393		43.6	2.38381	1.41585	0.575126	0.207697	0.091994	0.030557	0.025352		43.6	2.39725	1.651	0.921817	0.438245	0.188418	0.106709	0.043778
	43.8	1.39185	0.553733	0.20776	0.093477	0.025401	0.058287	0.029135		43.8	2.38829	1.42072	0.578122	0.20881	0.092452	0.031146	0.02549		43.8	2.39959	1.65379	0.924539	0.439702	0.189257	0.107476	0.044338
	44	1.3963	0.556151	0.208986	0.094118	0.025542	0.058218	0.02947		44	2.39247	1.42542	0.580468	0.210052	0.093636	0.031407	0.026101		44	2.40203	1.65652	0.927105	0.441536	0.190032	0.107979	0.045082
	44.2	1.40044	0.559146	0.210333	0.094598	0.025719	0.058845	0.02957		44.2	2.39683	1.43047	0.583189	0.211133	0.094404	0.03167	0.026652		44.2	2.40437	1.65873	0.929507	0.442748	0.190771	0.108468	0.045078
	44.4	1.40395	0.561442	0.211227	0.094592	0.025422	0.058884	0.02962		44.4	2.40087	1.43579	0.586073	0.212406	0.0951	0.032188	0.026894		44.4	2.40629	1.66083	0.932366	0.444115	0.19153	0.108925	0.045858
	44.6	1.40781	0.563925	0.212219	0.095019	0.025392	0.059128	0.02942		44.6	2.40489	1.44016	0.588676	0.213473	0.095456	0.031939	0.026115		44.6	2.40862	1.66273	0.934755	0.446201	0.192207	0.109922	0.047101
	44.8	1.41183	0.566496	0.213348	0.095821	0.025403	0.059083	0.029839		44.8	2.409	1.44466	0.591328	0.21496	0.095919	0.031924	0.026243		44.8	2.41044	1.66452	0.936611	0.447338	0.19226	0.109586	0.047046
	45	1.41612	0.568984	0.214076	0.096373	0.025774	0.059103	0.029925		45	2.41316	1.44884	0.59418	0.215798	0.09647	0.032192	0.02618		45	2.41261	1.66653	0.938836	0.449357	0.192598	0.110751	0.04764
	45.2	1.42009	0.571653	0.215697	0.097192	0.026163	0.059374	0.03019		45.2	2.41741	1.45352	0.596892	0.217065	0.096572	0.031973	0.026174		45.2	2.41428	1.66806	0.940429	0.450386	0.192468	0.110933	0.047514
	45.4	1.42413	0.573746	0.216732	0.097535	0.026058	0.059644	0.030681		45.4	2.42119	1.45798	0.5991	0.217527	0.09654	0.032178	0.026351		45.4	2.41614	1.67044	0.943017	0.451253	0.192637	0.110947	0.047793
	45.6	1.4277	0.575678	0.21758	0.097244	0.026016	0.059493	0.030799		45.6	2.42482	1.46172	0.601459	0.21856	0.096287	0.032236	0.025748		45.6	2.41778	1.67205	0.945003	0.452312	0.192562	0.111203	0.047304
	45.8	1.43126	0.57789	0.218618	0.097785	0.026351	0.059528	0.031318		45.8	2.42862	1.46568	0.603265	0.218915	0.096212	0.032808	0.025435		45.8	2.41929	1.67434	0.946958	0.453601	0.192934	0.111491	0.047655
	46	1.4353	0.580372	0.220057	0.098477	0.027048	0.059871	0.031752		46	2.43147	1.4689	0.605223	0.219015	0.096485	0.032592	0.02565		46	2.42148	1.67678	0.949842	0.455258	0.193583	0.111844	0.048158
	46.2	1.43859	0.58179	0.220302	0.098504	0.027024	0.059728	0.031566		46.2	2.43425	1.47233	0.606962	0.219608	0.096635	0.03308	0.025892		46.2	2.42304	1.67839	0.951659	0.456427	0.193811	0.112197	0.048231
	46.4	1.4422	0.58401	0.220827	0.098644	0.027187	0.06007	0.031494		46.4	2.43796	1.47618	0.608612	0.220114	0.09632	0.032675	0.025553		46.4	2.42533	1.68071	0.953734	0.457358	0.194334	0.112475	0.048266
	46.6	1.44652	0.586559	0.221745	0.099111	0.02783	0.060427	0.032022		46.6	2.44129	1.48018	0.610887	0.220729	0.096615	0.032621	0.025421		46.6	2.42733	1.68272	0.955809	0.458299	0.194726	0.112749	0.048268
	46.8	1.45074	0.589274	0.2226	0.099555	0.028375	0.060704	0.032198		46.8	2.44522	1.48478	0.613594	0.222362	0.097446	0.033032	0.025278		46.8	2.42903	1.68438	0.956834	0.45875	0.194634	0.112199	0.047664
	47	1.45461	0.591962	0.222881	0.099627	0.028847	0.060903	0.032429		47	2.45004	1.48952	0.616762	0.223765	0.098272	0.033756	0.025648		47	2.43083	1.68637	0.959132	0.459976	0.195152	0.112863	0.04795
	47.2	1.45846	0.59409	0.223763	0.099876	0.028832	0.061183	0.032272		47.2	2.45389	1.49403	0.619484	0.224632	0.099156	0.034306	0.02595		47.2	2.43282	1.68797	0.960481	0.460655	0.194741	0.113145	0.047568
	47.4	1.46272	0.596624	0.224634	0.100474	0.028919	0.06147	0.032304		47.4	2.45827	1.49865	0.622126	0.22584	0.100064	0.034593	0.026685		47.4	2.4351	1.69051	0.962915	0.461901	0.195196	0.113256	0.047848
	47.6	1.46624	0.599144	0.225347	0.101153	0.028807	0.061727	0.03199		47.6	2.46183	1.50272	0.624614	0.226584	0.10029	0.034724	0.02671		47.6	2.43733	1.69267	0.964751	0.463035	0.195487	0.113646	0.048264
	47.8	1.47017	0.601674	0.226455	0.101853	0.028679	0.0617	0.032562		47.8	2.46565	1.50702	0.626852	0.227942	0.101266	0.035039	0.026861		47.8	2.43958	1.69434	0.966347	0.463934	0.195861	0.113695	0.047802
	48	1.47429	0.604249	0.227376	0.1023	0.028998	0.06187	0.033028		48	2.46926	1.51144	0.628545	0.228796	0.101967	0.035238	0.027022		48	2.44141	1.69588	0.968221	0.464756	0.196175	0.113474	0.047688
	48.2	1.47819	0.606744	0.228609	0.102837	0.028997	0.062285	0.03341		48.2	2.47313	1.51661	0.631454	0.229536	0.102596	0.035762	0.027198		48.2	2.44279	1.69727	0.969691	0.465641	0.196321	0.113444	0.047358
	48.4	1.48171	0.608953	0.22911	0.103112	0.028827	0.062923	0.033574		48.4	2.47644	1.52077	0.633621	0.230435	0.103082	0.035756	0.027145		48.4	2.44487	1.69926	0.972459	0.466693	0.197299	0.113776	0.047891
	48.6	1.48553	0.61141	0.229876	0.103481	0.028974	0.062994	0.033732		48.6	2.48	1.52484	0.635475	0.231645	0.102711	0.035322	0.026832		48.6	2.44712	1.70121	0.974209	0.467838	0.197852	0.113839	0.048263
	48.8	1.48923	0.613823	0.231072	0.10411	0.028906	0.062765	0.034213		48.8	2.48297	1.52894	0.637649	0.232673	0.10296	0.035413	0.026983		48.8	2.44938	1.70362	0.976664	0.469329	0.198972	0.113921	0.048479
	49	1.4931	0.615684	0.231727	0.10418	0.028578	0.062531	0.034011		49	2.48649	1.53321	0.639698	0.233621	0.103222	0.035595	0.027193		49	2.45156	1.70573	0.979043	0.470598	0.199541	0.114474	0.048757
	49.2	1.49587	0.617481	0.232327	0.104488	0.028164	0.06246	0.033768		49.2	2.48975	1.53761	0.642167	0.23491	0.103096	0.035559	0.027202		49.2	2.4534	1.70775	0.981145	0.47144	0.200053	0.114372	0.048839
	49.4	1.49896	0.619068	0.232813	0.10469	0.027886	0.062133	0.033586		49.4	2.49326	1.54153	0.644449	0.236197	0.103763	0.03617	0.02735		49.4	2.45519	1.71031	0.983761	0.472772	0.20122	0.114585	0.049607
	49.6	1.50219	0.62062	0.233375	0.105217	0.027707	0.061965	0.033667		49.6	2.49658	1.54568	0.646196	0.237425	0.103608	0.036757	0.027213		49.6	2.45694	1.71208	0.98596	0.474356	0.201981	0.115541	0.049882
	49.8	1.50627	0.622754	0.234424	0.106089	0.028211	0.062364	0.033684		49.8	2.50001	1.54969	0.648516	0.238066	0.104089	0.036933	0.027136		49.8	2.4585	1.71435	0.987962	0.475462	0.202784	0.116076	0.050089
	50	1.50985	0.624845	0.23525	0.106724	0.028398	0.062338	0.033686		50	2.50297	1.55284	0.65046	0.238633	0.104683	0.036633	0.027368		50	2.46047	1.71674	0.990538	0.476924	0.203729	0.116576	0.050505
	50.2	1.5129	0.62608	0.235421	0.106552	0.028002	0.06214	0.033301		50.2	2.50579	1.55645	0.652223	0.239321	0.104388	0.036557	0.027199		50.2	2.46211	1.7182	0.991971	0.477561	0.203965	0.116907	0.050399
	50.4	1.51661	0.628615	0.236396	0.106941	0.028478	0.062636	0.033275		50.4	2.50867	1.56041	0.654309	0.240144	0.10414	0.035915	0.026753		50.4	2.46396	1.72003	0.993469	0.4784	0.204451	0.117283	0.050325
	50.6	1.52062	0.631025	0.237235	0.107299	0.028607	0.063095	0.03375		50.6	2.51159	1.56438	0.656471	0.241203	0.10454	0.036056	0.026535		50.6	2.46581	1.72189	0.995308	0.479822	0.204625	0.117886	0.050444
	50.8	1.52377	0.632895	0.237541	0.107066	0.028745	0.062984	0.033285		50.8	2.51536	1.5685	0.659292	0.242446	0.105381	0.036477	0.026809		50.8	2.46714	1.72341	0.996834	0.481387	0.204745	0.118183	0.050322
	51	1.52761	0.635228	0.238602	0.107771	0.029034	0.063328	0.032972		51	2.51906	1.57241	0.661685	0.243804	0.106257	0.036625	0.027354		51	2.46927	1.72562	0.999135	0.482892	0.20514	0.118567	0.050699
	51.2	1.53165	0.637663	0.239818	0.108317	0.029548	0.064185	0.03306		51.2	2.52213	1.57618	0.663787	0.244201	0.106775	0.036412	0.027147		51.2	2.47132	1.72752	1.00105	0.483828	0.205086	0.119109	0.050614
	51.4	1.53507	0.639999	0.240937	0.108407	0.029464	0.064496	0.033		51.4	2.52532	1.58022	0.666259	0.244969	0.106815	0.036262	0.027187		51.4	2.47293	1.72938	1.00311	0.485363	0.205617	0.119404	0.050598
	51.6	1.53912	0.642512	0.241946	0.108795	0.029978	0.064715	0.03315		51.6	2.52827	1.58428	0.66847	0.245876	0.107106	0.036275	0.026682		51.6	2.47407	1.73056	1.00447	0.48634	0.20557	0.119075	0.049655
	51.8	1.54289	0.644926	0.243382	0.109182	0.03067	0.065094	0.033599		51.8	2.53133	1.58825	0.670719	0.246504	0.10742	0.036092	0.026586		51.8	2.47587	1.73207	1.00621	0.487679	0.206075	0.119467	0.049695
	52	1.54662	0.647181	0.244046	0.109412	0.030747	0.065567	0.033253		52	2.53423	1.5925	0.67307	0.246965	0.107686	0.036167	0.026449		52	2.47749	1.73353	1.00794	0.488116	0.206266	0.119316	0.049773
	52.2	1.55043	0.649341	0.24502	0.109724	0.031402	0.066356	0.033337		52.2	2.53742	1.59678	0.675327	0.24774	0.10798	0.035719	0.026421		52.2	2.47928	1.735	1.00979	0.488911	0.206509	0.119491	0.049408
	52.4	1.55386	0.652008	0.245874	0.109896	0.031497	0.066654	0.033366		52.4	2.53995	1.60041	0.677392	0.248596	0.107908	0.0358	0.026589		52.4	2.48106	1.73666	1.01191	0.489492	0.2071	0.120017	0.049723
	52.6	1.55733	0.654608	0.247256	0.110443	0.031756	0.066819	0.033415		52.6	2.54306	1.6045	0.679543	0.249479	0.107926	0.035902	0.026565		52.6	2.48304	1.73875	1.01408	0.490808	0.20797	0.120231	0.050175
	52.8	1.56063	0.656726	0.248343	0.110741	0.031365	0.067229	0.033017		52.8	2.54651	1.60873	0.682347	0.250656	0.108518	0.036159	0.026475		52.8	2.48485	1.74049	1.01631	0.492231	0.209168	0.121006	0.050629
	53	1.56427	0.658654	0.249063	0.111179	0.031227	0.067161	0.032763		53	2.54978	1.61298	0.685297	0.252294	0.109467	0.036789	0.026768		53	2.48629	1.74219	1.01817	0.49306	0.209902	0.121244	0.050727
	53.2	1.56722	0.661007	0.249337	0.111301	0.030931	0.067096	0.032223		53.2	2.55319	1.61698	0.68791	0.253743	0.109718	0.03702	0.026932		53.2	2.48788	1.74349	1.01982	0.493814	0.21055	0.121309	0.051023
	53.4	1.57078	0.663577	0.250329	0.112071	0.031182	0.067405	0.033212		53.4	2.55652	1.62103	0.690366	0.2546	0.110122	0.037816	0.027398		53.4	2.48934	1.7451	1.0214	0.494312	0.211547	0.121646	0.051386
	53.6	1.57419	0.66574	0.250682	0.112443	0.031054	0.067457	0.033253		53.6	2.56	1.62528	0.692727	0.255559	0.110515	0.038454	0.027407		53.6	2.49109	1.74668	1.0231	0.495004	0.212098	0.121801	0.051113
	53.8	1.57716	0.667856	0.251206	0.112702	0.030995	0.067175	0.032976		53.8	2.56334	1.62916	0.695353	0.25635	0.111026	0.038048	0.027727		53.8	2.49203	1.74809	1.02447	0.495482	0.212116	0.121541	0.050266
	54	1.57909	0.669142	0.250826	0.112142	0.029925	0.066566	0.03275		54	2.56614	1.63272	0.697242	0.256993	0.110956	0.037884	0.027967		54	2.49367	1.74989	1.02622	0.496342	0.212476	0.121833	0.050592
	54.2	1.58155	0.670563	0.250846	0.111935	0.02956	0.066568	0.032297		54.2	2.56888	1.63668	0.699382	0.258564	0.11128	0.038161	0.028054		54.2	2.49549	1.75112	1.02796	0.497067	0.212521	0.122006	0.050693
	54.4	1.58449	0.672702	0.25122	0.112097	0.029617	0.06694	0.032193		54.4	2.57164	1.64078	0.701693	0.259265	0.111796	0.038182	0.028239		54.4	2.49708	1.75301	1.02975	0.498318	0.212897	0.121931	0.050602
	54.6	1.58719	0.674756	0.25162	0.112189	0.029447	0.066689	0.032366		54.6	2.5753	1.6445	0.704397	0.260239	0.112419	0.03859	0.028449		54.6	2.49904	1.75543	1.03163	0.499533	0.213394	0.122281	0.050828
	54.8	1.59032	0.677083	0.252857	0.112899	0.030487	0.066501	0.032416		54.8	2.57835	1.64832	0.706481	0.261273	0.113369	0.038744	0.029255		54.8	2.50062	1.75683	1.03337	0.500119	0.213343	0.121793	0.050854
	55	1.59371	0.679515	0.25389	0.113283	0.030519	0.066558	0.032761		55	2.58146	1.65217	0.708586	0.262327	0.113585	0.038885	0.029052		55	2.50281	1.75865	1.03616	0.500802	0.213438	0.121958	0.051143
	55.2	1.59672	0.681579	0.254903	0.113086	0.030287	0.066442	0.033017		55.2	2.585	1.65625	0.711621	0.263409	0.114219	0.039015	0.029453		55.2	2.50511	1.76088	1.03803	0.501896	0.213664	0.122732	0.05128
	55.4	1.59976	0.683681	0.256119	0.113634	0.030385	0.066394	0.033043		55.4	2.5882	1.66036	0.714167	0.264751	0.114564	0.039137	0.029579		55.4	2.50638	1.76231	1.03974	0.503378	0.213898	0.122742	0.050927
	55.6	1.60329	0.685882	0.257366	0.114022	0.030995	0.066467	0.03316		55.6	2.59144	1.66416	0.716609	0.265794	0.115109	0.03948	0.029863		55.6	2.50862	1.764	1.04148	0.504692	0.214195	0.122692	0.050561
	55.8	1.60607	0.687773	0.258438	0.114026	0.031331	0.066301	0.033235		55.8	2.59459	1.66781	0.71901	0.266884	0.11549	0.039484	0.030037		55.8	2.51083	1.76602	1.04296	0.505505	0.214533	0.12334	0.051031
	56	1.60934	0.68976	0.259775	0.114308	0.03138	0.066616	0.033685		56	2.59776	1.67135	0.721033	0.267745	0.115896	0.039518	0.030567		56	2.51262	1.76807	1.04493	0.506405	0.214779	0.12335	0.05058
	56.2	1.61278	0.692135	0.261248	0.11439	0.032078	0.067053	0.034153		56.2	2.60084	1.67507	0.723151	0.268447	0.116149	0.039439	0.030234		56.2	2.51436	1.76987	1.04728	0.507408	0.215193	0.123829	0.050768
	56.4	1.61577	0.694404	0.26276	0.114756	0.032035	0.067337	0.034098		56.4	2.60353	1.67854	0.725202	0.269016	0.116066	0.039457	0.030192		56.4	2.5162	1.77175	1.04903	0.508464	0.216093	0.124388	0.051391
	56.6	1.61898	0.696619	0.263701	0.114877	0.031909	0.067675	0.033657		56.6	2.60627	1.68123	0.727198	0.269639	0.115904	0.039089	0.029304		56.6	2.51811	1.77352	1.05136	0.51022	0.217363	0.124634	0.052159
	56.8	1.62281	0.699008	0.264592	0.115096	0.032127	0.067994	0.03344		56.8	2.60913	1.68471	0.7298	0.270767	0.116267	0.039137	0.029119		56.8	2.5194	1.77487	1.05274	0.511062	0.217952	0.125058	0.052246
	57	1.62632	0.70107	0.265646	0.115383	0.031822	0.067612	0.03361		57	2.61143	1.68763	0.731651	0.271762	0.116203	0.039225	0.028987		57	2.52027	1.77616	1.05358	0.51189	0.218152	0.124879	0.051929
	57.2	1.63017	0.703951	0.266608	0.115765	0.031989	0.068195	0.033766		57.2	2.61436	1.69123	0.733341	0.272058	0.116071	0.038923	0.028869		57.2	2.52195	1.77784	1.05559	0.512985	0.219048	0.124912	0.05242
	57.4	1.63361	0.706275	0.268077	0.116861	0.03259	0.068712	0.034505		57.4	2.61724	1.69497	0.735512	0.272909	0.116405	0.038881	0.028828		57.4	2.52355	1.77971	1.05708	0.513826	0.219523	0.124944	0.052813
	57.6	1.63713	0.708256	0.268582	0.117202	0.032734	0.068886	0.034359		57.6	2.62012	1.69853	0.737652	0.273967	0.116623	0.038561	0.028489		57.6	2.52491	1.78165	1.0588	0.514862	0.219987	0.125293	0.052943
	57.8	1.64037	0.710658	0.269366	0.11752	0.032489	0.068841	0.034406		57.8	2.62289	1.7021	0.740047	0.274721	0.116985	0.038389	0.028591		57.8	2.52626	1.78323	1.06028	0.516132	0.220181	0.125494	0.053334
	58	1.64378	0.713173	0.270041	0.117803	0.032567	0.069173	0.034754		58	2.62549	1.7054	0.742221	0.275818	0.117772	0.03874	0.02849		58	2.52774	1.78473	1.06168	0.517283	0.220125	0.125793	0.053772
	58.2	1.64696	0.715866	0.270593	0.118499	0.033115	0.069585	0.035085		58.2	2.62807	1.70873	0.744428	0.276892	0.11786	0.038807	0.02809		58.2	2.52874	1.78569	1.06304	0.5183	0.220395	0.125857	0.05364
	58.4	1.65011	0.718341	0.271306	0.118686	0.03317	0.069574	0.035117		58.4	2.63066	1.71234	0.74746	0.277437	0.118499	0.039338	0.028505		58.4	2.5294	1.78688	1.06414	0.519073	0.220235	0.125334	0.053584
	58.6	1.65288	0.720574	0.272306	0.11898	0.033574	0.069478	0.035334		58.6	2.63364	1.71602	0.749646	0.278458	0.119246	0.039912	0.028826		58.6	2.53082	1.78827	1.06554	0.520041	0.220584	0.124899	0.053971
	58.8	1.65591	0.722815	0.27278	0.119642	0.033825	0.069888	0.035525		58.8	2.63603	1.7195	0.751427	0.279089	0.119769	0.040098	0.028344		58.8	2.5322	1.78934	1.06715	0.52057	0.220448	0.124911	0.054235
	59	1.65813	0.72499	0.273045	0.119339	0.033423	0.069793	0.035014		59	2.6386	1.72313	0.753858	0.280001	0.120542	0.040271	0.02815		59	2.53394	1.7906	1.06887	0.521491	0.220396	0.125484	0.054381
	59.2	1.66107	0.72722	0.274116	0.119987	0.033277	0.070392	0.035596		59.2	2.64133	1.72664	0.756187	0.280918	0.120807	0.03973	0.028442		59.2	2.53595	1.79229	1.07024	0.523129	0.220831	0.125785	0.054159
	59.4	1.66375	0.729078	0.274461	0.120663	0.03347	0.071002	0.035553		59.4	2.64426	1.73085	0.75854	0.281765	0.121524	0.039835	0.028472		59.4	2.5381	1.79301	1.07185	0.52425	0.221519	0.126169	0.054126
	59.6	1.66624	0.730775	0.274709	0.120514	0.033127	0.071209	0.035145		59.6	2.64773	1.73499	0.761218	0.282802	0.122667	0.04066	0.029428		59.6	2.54034	1.79433	1.0734	0.525234	0.222021	0.126324	0.054115
	59.8	1.66901	0.733057	0.275449	0.121253	0.033447	0.071541	0.035533		59.8	2.65008	1.73833	0.763141	0.283295	0.122475	0.040291	0.029277		59.8	2.54174	1.79563	1.07478	0.525759	0.222203	0.126707	0.053989
	60	1.67198	0.73526	0.276369	0.121855	0.033738	0.071838	0.035734		60	2.65274	1.74157	0.765806	0.28406	0.12292	0.040365	0.029302		60	2.5437	1.79723	1.07673	0.527194	0.222664	0.127418	0.053986
	60.2	1.67446	0.736857	0.276674	0.121992	0.03364	0.071823	0.035193		60.2	2.65554	1.74548	0.767951	0.284793	0.123236	0.040316	0.029208		60.2	2.54545	1.79838	1.07863	0.527966	0.223595	0.127552	0.054
	60.4	1.67685	0.738377	0.277325	0.122491	0.033089	0.071792	0.034754		60.4	2.65822	1.74936	0.770587	0.285888	0.123814	0.040641	0.029818		60.4	2.54729	1.79945	1.08026	0.529106	0.22412	0.127746	0.054138
	60.6	1.68071	0.741181	0.278505	0.123256	0.033758	0.07251	0.034756		60.6	2.66022	1.75257	0.772713	0.287001	0.124402	0.040575	0.029249		60.6	2.54833	1.80087	1.08188	0.530183	0.224752	0.128002	0.054417
	60.8	1.68417	0.743523	0.279975	0.123999	0.034535	0.072973	0.035419		60.8	2.6626	1.75637	0.774461	0.287817	0.1244	0.040649	0.029649		60.8	2.54983	1.80251	1.08333	0.530884	0.224809	0.128704	0.054659
	61	1.68721	0.745663	0.281593	0.124729	0.034645	0.073409	0.035902		61	2.66476	1.75977	0.776476	0.288722	0.124084	0.040506	0.029474		61	2.55096	1.80363	1.08455	0.531774	0.224968	0.128794	0.054483
	61.2	1.69064	0.74796	0.282895	0.125787	0.035638	0.074171	0.036463		61.2	2.66742	1.76382	0.778729	0.289779	0.124701	0.040295	0.029446		61.2	2.55269	1.80543	1.08668	0.532302	0.225461	0.129064	0.054715
	61.4	1.69372	0.750397	0.284563	0.126692	0.036049	0.074569	0.037053		61.4	2.66992	1.76702	0.781023	0.291186	0.124856	0.040353	0.029225		61.4	2.5546	1.80745	1.08795	0.533157	0.225682	0.129637	0.054911
	61.6	1.69762	0.752906	0.285741	0.126725	0.036639	0.074706	0.037488		61.6	2.67241	1.77064	0.783027	0.292355	0.125632	0.040934	0.029548		61.6	2.55565	1.80949	1.08922	0.533902	0.225955	0.130045	0.054545
	61.8	1.70075	0.755177	0.287253	0.127032	0.036999	0.074922	0.03755		61.8	2.6752	1.77418	0.785125	0.293455	0.126428	0.04172	0.030089		61.8	2.55732	1.81134	1.09063	0.534617	0.226256	0.130098	0.054722
	62	1.70369	0.757883	0.288546	0.127538	0.037571	0.074914	0.038106		62	2.67788	1.7775	0.78757	0.294938	0.12693	0.042326	0.030704		62	2.55846	1.81269	1.09211	0.535661	0.226071	0.130303	0.054191
	62.2	1.70629	0.760018	0.289439	0.127209	0.037722	0.074731	0.037809		62.2	2.68085	1.78096	0.789793	0.296243	0.127311	0.042977	0.030971		62.2	2.5598	1.81442	1.09404	0.536359	0.226873	0.130623	0.054326
	62.4	1.70889	0.761314	0.290034	0.126943	0.037445	0.074543	0.037137		62.4	2.6834	1.78377	0.791991	0.29676	0.128032	0.043647	0.031329		62.4	2.56105	1.81616	1.09553	0.536993	0.226908	0.13034	0.05475
	62.6	1.71136	0.762727	0.290954	0.127121	0.037677	0.074465	0.037251		62.6	2.68585	1.7869	0.793352	0.297534	0.128727	0.043948	0.030723		62.6	2.56301	1.81816	1.09696	0.537804	0.227504	0.130609	0.055121
	62.8	1.71425	0.764346	0.291269	0.127547	0.037271	0.074449	0.037214		62.8	2.68869	1.79023	0.795443	0.298403	0.129166	0.044363	0.03029		62.8	2.56479	1.81967	1.09834	0.538239	0.22792	0.131179	0.055338
	63	1.71709	0.766602	0.292303	0.12799	0.037151	0.074404	0.037078		63	2.69109	1.79356	0.797683	0.299026	0.128986	0.044384	0.030364		63	2.56662	1.82045	1.09935	0.538846	0.228038	0.131296	0.055482
	63.2	1.72013	0.768112	0.293047	0.128767	0.036987	0.074785	0.03736		63.2	2.69377	1.79697	0.799786	0.29987	0.12945	0.043943	0.030408		63.2	2.56874	1.82217	1.10118	0.54019	0.229066	0.131771	0.055441
	63.4	1.7225	0.769687	0.293452	0.128592	0.036867	0.075051	0.036722		63.4	2.69666	1.80068	0.802173	0.300922	0.130435	0.044312	0.030565		63.4	2.57062	1.82352	1.10302	0.541102	0.229974	0.132665	0.055854
	63.6	1.72567	0.771844	0.2941	0.128746	0.036809	0.075069	0.037131		63.6	2.6997	1.80365	0.804456	0.301732	0.130793	0.045168	0.031022		63.6	2.57211	1.82453	1.10433	0.542075	0.230563	0.132736	0.055846
	63.8	1.72903	0.773936	0.294791	0.129354	0.036787	0.074941	0.037031		63.8	2.70198	1.80686	0.806456	0.302527	0.130507	0.045043	0.030876		63.8	2.5741	1.82594	1.10617	0.54369	0.23127	0.133442	0.056005
	64	1.73196	0.775929	0.295234	0.129413	0.036849	0.074479	0.036744		64	2.70464	1.81011	0.808509	0.303741	0.13078	0.045169	0.030819		64	2.57589	1.82784	1.1083	0.545448	0.231874	0.133677	0.056358
	64.2	1.73451	0.777723	0.295566	0.129642	0.036556	0.074522	0.036708		64.2	2.70737	1.81397	0.81087	0.304928	0.13118	0.045215	0.031182		64.2	2.57723	1.82952	1.11019	0.546506	0.232614	0.133692	0.05669
	64.4	1.73734	0.780042	0.296336	0.130281	0.036325	0.075294	0.037311		64.4	2.71001	1.81788	0.81335	0.306788	0.132527	0.045816	0.031846		64.4	2.5791	1.83144	1.11208	0.54784	0.233304	0.134431	0.057515
	64.6	1.74033	0.782454	0.296918	0.130566	0.036642	0.075674	0.037676		64.6	2.71202	1.82072	0.81498	0.307757	0.132461	0.045297	0.031518		64.6	2.58002	1.83286	1.11274	0.548661	0.23335	0.134281	0.057119
	64.8	1.7426	0.784601	0.297613	0.131017	0.036409	0.07549	0.038441		64.8	2.71463	1.8241	0.817423	0.308883	0.132169	0.045253	0.031331		64.8	2.58179	1.83439	1.11404	0.549564	0.23347	0.134666	0.057441
	65	1.74497	0.786643	0.298253	0.131397	0.036016	0.075545	0.038513		65	2.71676	1.82755	0.819199	0.309966	0.132368	0.044609	0.030755		65	2.58284	1.83566	1.11514	0.550558	0.233502	0.134844	0.057047
	65.2	1.74672	0.788228	0.298569	0.131106	0.035407	0.075034	0.038182		65.2	2.71918	1.83131	0.821187	0.311149	0.132932	0.044383	0.03099		65.2	2.58416	1.83754	1.11654	0.551109	0.233503	0.134972	0.056851
	65.4	1.74908	0.790848	0.299368	0.131158	0.035498	0.075377	0.03804		65.4	2.72239	1.8351	0.823958	0.312671	0.133864	0.045141	0.03141		65.4	2.58557	1.83917	1.11774	0.552245	0.233786	0.134908	0.057023
	65.6	1.75165	0.793214	0.3005	0.131424	0.036125	0.075567	0.038205		65.6	2.72525	1.83884	0.826101	0.313824	0.134487	0.045449	0.032173		65.6	2.58663	1.84077	1.11928	0.55299	0.233994	0.134971	0.057162
	65.8	1.75381	0.795832	0.301497	0.132113	0.036642	0.07594	0.038431		65.8	2.72755	1.84215	0.828414	0.314769	0.134656	0.045392	0.032332		65.8	2.58866	1.84231	1.12116	0.553931	0.234198	0.135277	0.057463
	66	1.75639	0.798387	0.302896	0.132625	0.036954	0.07634	0.038579		66	2.72996	1.84535	0.830935	0.315959	0.135176	0.04542	0.032652		66	2.58957	1.84337	1.12183	0.554777	0.234093	0.135182	0.057357
	66.2	1.75836	0.799747	0.303739	0.13229	0.036769	0.075935	0.037932		66.2	2.73254	1.84835	0.832941	0.316536	0.135213	0.045722	0.032112		66.2	2.5908	1.84468	1.12259	0.55509	0.233943	0.134841	0.057206
	66.4	1.76109	0.80129	0.304323	0.132798	0.036875	0.076342	0.037744		66.4	2.73469	1.85106	0.835077	0.316604	0.135169	0.045991	0.031484		66.4	2.59226	1.8454	1.12303	0.555482	0.233705	0.134675	0.056991
	66.6	1.76406	0.803383	0.306057	0.133514	0.037885	0.076966	0.038435		66.6	2.73728	1.85444	0.837173	0.317525	0.13603	0.046493	0.03152		66.6	2.59383	1.84647	1.12366	0.556044	0.233771	0.134578	0.057155
	66.8	1.7662	0.804979	0.306926	0.133445	0.037253	0.076997	0.038136		66.8	2.73945	1.8577	0.839041	0.317843	0.13601	0.046654	0.031499		66.8	2.59492	1.84692	1.12458	0.556407	0.233929	0.134368	0.056949
	67	1.7685	0.806839	0.307818	0.13347	0.037575	0.077154	0.038116		67	2.74143	1.86033	0.841158	0.318481	0.136459	0.046435	0.031272		67	2.59627	1.8477	1.12557	0.557461	0.234503	0.134828	0.057072
	67.2	1.77058	0.808439	0.308975	0.133465	0.037774	0.077252	0.03764		67.2	2.74339	1.86316	0.842885	0.319175	0.136843	0.046461	0.030867		67.2	2.59762	1.84922	1.12696	0.558336	0.235255	0.135253	0.056841
	67.4	1.77384	0.810808	0.310263	0.133183	0.038365	0.077862	0.038144		67.4	2.74571	1.86612	0.844973	0.319841	0.13713	0.046912	0.031279		67.4	2.59907	1.85016	1.1287	0.559229	0.23595	0.13561	0.057099
	67.6	1.77771	0.813339	0.311338	0.133306	0.038809	0.077916	0.038381		67.6	2.74799	1.86906	0.846722	0.320796	0.137564	0.047408	0.031447		67.6	2.60075	1.85099	1.12995	0.56059	0.23662	0.135658	0.057208
	67.8	1.78112	0.815849	0.312256	0.133779	0.039288	0.07829	0.03833		67.8	2.74965	1.87198	0.848642	0.32174	0.137649	0.047495	0.031613		67.8	2.60253	1.85261	1.13176	0.562074	0.237369	0.135974	0.057416
	68	1.78439	0.818569	0.313565	0.134306	0.039894	0.078625	0.038696		68	2.75152	1.87465	0.850728	0.322504	0.138086	0.048044	0.032198		68	2.60366	1.85407	1.13334	0.563159	0.237982	0.135836	0.05764
	68.2	1.78732	0.820472	0.314315	0.13482	0.040018	0.078927	0.039167		68.2	2.75442	1.87844	0.853615	0.323995	0.139453	0.049063	0.033318		68.2	2.60464	1.85497	1.13416	0.563793	0.238105	0.135916	0.057907
	68.4	1.79032	0.82274	0.31508	0.135238	0.039861	0.0789	0.039758		68.4	2.75673	1.88152	0.855633	0.325107	0.140295	0.049712	0.033788		68.4	2.60627	1.85593	1.13572	0.564415	0.238822	0.136237	0.057927
	68.6	1.79353	0.825065	0.316328	0.136027	0.039926	0.07885	0.040207		68.6	2.759	1.88405	0.857714	0.325677	0.140349	0.049668	0.033742		68.6	2.60691	1.85662	1.13658	0.564921	0.238833	0.135622	0.057428
	68.8	1.79648	0.82735	0.31761	0.136795	0.039871	0.078907	0.040493		68.8	2.76087	1.88692	0.859551	0.326536	0.140302	0.049618	0.03366		68.8	2.60892	1.85802	1.13819	0.565665	0.239412	0.136536	0.058
	69	1.79875	0.828745	0.318152	0.136844	0.03911	0.078608	0.040415		69	2.76318	1.89003	0.862013	0.327652	0.140796	0.050234	0.033988		69	2.60999	1.85928	1.13963	0.566695	0.239491	0.137048	0.058071
	69.2	1.80107	0.830777	0.319107	0.137521	0.038867	0.07844	0.040224		69.2	2.76519	1.89289	0.864371	0.32848	0.14108	0.05054	0.034084		69.2	2.61137	1.86049	1.14081	0.567148	0.239539	0.13698	0.058034
	69.4	1.80351	0.83349	0.320111	0.138624	0.039618	0.078742	0.040902		69.4	2.76752	1.8957	0.867048	0.329573	0.141451	0.050935	0.034167		69.4	2.61263	1.86112	1.14183	0.56798	0.239741	0.136665	0.05796
	69.6	1.80542	0.835254	0.320437	0.139495	0.039371	0.078867	0.040598		69.6	2.76896	1.89838	0.868825	0.330128	0.14133	0.050682	0.033707		69.6	2.61419	1.86252	1.14294	0.568862	0.2405	0.137095	0.058335
	69.8	1.80787	0.837547	0.321214	0.140265	0.039566	0.079194	0.040673		69.8	2.77071	1.90093	0.870199	0.33061	0.141549	0.050297	0.033506		69.8	2.61561	1.8638	1.14369	0.569112	0.240418	0.137149	0.058133
	70	1.81024	0.838822	0.322183	0.140712	0.039349	0.079379	0.040344		70	2.77257	1.90369	0.872124	0.331286	0.141268	0.050229	0.033091		70	2.61689	1.86494	1.14384	0.569612	0.240822	0.137219	0.058229
	70.2	1.81218	0.840887	0.32298	0.140971	0.039434	0.079357	0.040288		70.2	2.77436	1.90609	0.87388	0.331508	0.140888	0.050335	0.032272		70.2	2.61872	1.86676	1.14502	0.570197	0.240948	0.137165	0.058425
	70.4	1.81455	0.842683	0.323637	0.141666	0.039534	0.079914	0.0404		70.4	2.77611	1.90866	0.875203	0.331572	0.140746	0.050108	0.031637		70.4	2.62055	1.86792	1.14672	0.570799	0.241164	0.137403	0.058718
	70.6	1.81652	0.844235	0.32397	0.141732	0.039994	0.079849	0.040463		70.6	2.77826	1.91098	0.876822	0.332294	0.140791	0.049477	0.031493		70.6	2.62235	1.86965	1.14839	0.572094	0.241878	0.138093	0.059566
	70.8	1.81757	0.845487	0.323896	0.141094	0.039178	0.079203	0.039458		70.8	2.78009	1.9139	0.878656	0.33312	0.140604	0.048868	0.031158		70.8	2.62381	1.87131	1.15033	0.573151	0.242448	0.13872	0.059761
	71	1.82002	0.847498	0.324362	0.141105	0.039489	0.0793	0.039585		71	2.78257	1.91668	0.880875	0.334375	0.141094	0.048678	0.031527		71	2.62551	1.87326	1.15213	0.574869	0.243316	0.139522	0.060299
	71.2	1.82222	0.84942	0.325138	0.141012	0.039902	0.079329	0.039254		71.2	2.78448	1.91966	0.882581	0.335259	0.14112	0.04846	0.030939		71.2	2.62669	1.87488	1.15333	0.575679	0.24324	0.139371	0.06034
	71.4	1.82533	0.851622	0.325943	0.14074	0.04041	0.079874	0.039305		71.4	2.78679	1.92304	0.885001	0.336438	0.142214	0.048582	0.031624		71.4	2.62846	1.87705	1.1554	0.577465	0.243877	0.139758	0.060932
	71.6	1.82786	0.853696	0.326727	0.140293	0.040336	0.079764	0.039129		71.6	2.78836	1.92599	0.887264	0.337506	0.142761	0.048222	0.03125		71.6	2.62998	1.87887	1.15706	0.579526	0.244503	0.140389	0.061322
	71.8	1.83049	0.855908	0.327234	0.140653	0.040855	0.080023	0.039678		71.8	2.79005	1.92901	0.889829	0.338499	0.143355	0.048557	0.031853		71.8	2.63168	1.8801	1.15843	0.580776	0.245145	0.14101	0.061634
	72	1.833	0.857846	0.328219	0.140769	0.041365	0.080095	0.039879		72	2.79251	1.93249	0.892287	0.340035	0.144416	0.049717	0.032208		72	2.63259	1.88096	1.15933	0.581446	0.24515	0.141054	0.061636
	72.2	1.83543	0.859407	0.328964	0.141007	0.041442	0.079599	0.040098		72.2	2.79491	1.93567	0.894624	0.340998	0.144906	0.049844	0.032239		72.2	2.63391	1.88174	1.16077	0.582091	0.244996	0.141502	0.061913
	72.4	1.83854	0.861572	0.329862	0.141559	0.041357	0.079837	0.040534		72.4	2.7973	1.93871	0.897202	0.342409	0.145398	0.050179	0.032439		72.4	2.63502	1.88333	1.16219	0.582441	0.245738	0.142011	0.061639
	72.6	1.84102	0.862976	0.330682	0.141946	0.041534	0.080361	0.040895		72.6	2.79961	1.94138	0.899701	0.343627	0.145292	0.050115	0.033196		72.6	2.63634	1.88486	1.16369	0.58349	0.246247	0.142435	0.061925
	72.8	1.84299	0.864757	0.331368	0.14194	0.041076	0.080007	0.040525		72.8	2.80119	1.94453	0.901815	0.344617	0.145696	0.050483	0.03302		72.8	2.63776	1.88576	1.16449	0.584097	0.246234	0.143028	0.061683
	73	1.84483	0.866398	0.332171	0.142267	0.040528	0.07964	0.040634		73	2.80343	1.94765	0.904394	0.345711	0.14638	0.050577	0.03289		73	2.63869	1.88702	1.16547	0.584667	0.246623	0.14313	0.061228
	73.2	1.84709	0.868867	0.333326	0.142828	0.040246	0.079493	0.040767		73.2	2.80523	1.95043	0.906002	0.346424	0.14669	0.050383	0.032866		73.2	2.63994	1.88773	1.16635	0.585	0.2467	0.14284	0.060701
	73.4	1.84964	0.871476	0.33422	0.143777	0.040398	0.079675	0.040976		73.4	2.80769	1.95379	0.908356	0.347522	0.148004	0.050922	0.033991		73.4	2.64101	1.88841	1.16737	0.585702	0.247433	0.142636	0.060581
	73.6	1.85195	0.873485	0.335105	0.144228	0.040361	0.080186	0.040913		73.6	2.80991	1.95651	0.90994	0.348155	0.148097	0.050894	0.034018		73.6	2.6425	1.88975	1.16832	0.58628	0.248482	0.143316	0.060759
	73.8	1.85515	0.87613	0.336847	0.145035	0.041058	0.080825	0.041928		73.8	2.81232	1.95967	0.911667	0.348927	0.148395	0.050936	0.034021		73.8	2.64332	1.8908	1.169	0.58626	0.248497	0.143521	0.060441
	74	1.85755	0.877878	0.338192	0.145157	0.040936	0.081192	0.041642		74	2.81411	1.96268	0.913895	0.349565	0.148681	0.051226	0.034121		74	2.64485	1.89201	1.16974	0.587199	0.249461	0.143757	0.061169
	74.2	1.86008	0.881201	0.33955	0.146213	0.041965	0.082221	0.042403		74.2	2.81646	1.96564	0.916033	0.350326	0.14904	0.051546	0.034652		74.2	2.6456	1.89319	1.1705	0.586968	0.249275	0.143578	0.061049
	74.4	1.86224	0.882693	0.339528	0.146527	0.041731	0.082556	0.042475		74.4	2.81851	1.96848	0.917792	0.35121	0.149493	0.05156	0.034437		74.4	2.64694	1.89389	1.17176	0.587519	0.249535	0.143698	0.0609
	74.6	1.86472	0.884843	0.34013	0.146992	0.042267	0.08334	0.042794		74.6	2.82107	1.97126	0.919885	0.353011	0.149946	0.051961	0.035084		74.6	2.64833	1.89519	1.17285	0.589165	0.25017	0.144213	0.061134
	74.8	1.86712	0.887015	0.340757	0.147567	0.042343	0.083949	0.042767		74.8	2.82319	1.97436	0.922263	0.354429	0.149893	0.052191	0.03505		74.8	2.6492	1.89671	1.17412	0.589784	0.250532	0.144198	0.060928
	75	1.86996	0.889445	0.341668	0.148131	0.042756	0.084516	0.043058		75	2.82559	1.97704	0.924319	0.355999	0.150693	0.052578	0.035049		75	2.65068	1.89817	1.17541	0.590664	0.251184	0.144478	0.060891
	75.2	1.8723	0.891282	0.342469	0.148516	0.043369	0.084848	0.042732		75.2	2.82749	1.9799	0.925751	0.357075	0.151197	0.052363	0.034555		75.2	2.65178	1.89916	1.17637	0.591574	0.251062	0.144395	0.060862
	75.4	1.87413	0.892767	0.343098	0.148491	0.043464	0.084805	0.042257		75.4	2.82961	1.98268	0.928425	0.35833	0.151873	0.052592	0.034958		75.4	2.65359	1.90088	1.17813	0.593182	0.251823	0.145051	0.061348
	75.6	1.87603	0.894447	0.343328	0.148263	0.043192	0.084354	0.042182		75.6	2.83092	1.98516	0.930195	0.359541	0.152331	0.052616	0.034944		75.6	2.65551	1.90193	1.1798	0.59432	0.252192	0.145533	0.061501
	75.8	1.87871	0.896454	0.3443	0.149201	0.043765	0.08456	0.042425		75.8	2.83247	1.98747	0.93177	0.360694	0.152489	0.052612	0.034654		75.8	2.6571	1.90268	1.1803	0.594772	0.252408	0.145727	0.061434
	76	1.88041	0.898181	0.345045	0.149593	0.043825	0.084385	0.041935		76	2.83474	1.99057	0.934269	0.362103	0.153235	0.053306	0.03458		76	2.65869	1.90385	1.18119	0.595154	0.25264	0.145335	0.061678
	76.2	1.88292	0.899524	0.345706	0.149917	0.043729	0.08428	0.041649		76.2	2.83669	1.9929	0.936325	0.362767	0.153323	0.053032	0.03489		76.2	2.66026	1.90466	1.18269	0.596167	0.253196	0.145616	0.061644
	76.4	1.88514	0.901731	0.346709	0.150466	0.043672	0.084507	0.041712		76.4	2.83861	1.99557	0.938212	0.363385	0.153107	0.053064	0.034999		76.4	2.66139	1.90597	1.18382	0.596982	0.253602	0.145458	0.061398
	76.6	1.88706	0.903727	0.347752	0.150172	0.043957	0.084719	0.041393		76.6	2.83991	1.99786	0.940042	0.36399	0.153125	0.052387	0.034723		76.6	2.66313	1.90723	1.18551	0.5977	0.253806	0.145361	0.06209
	76.8	1.88886	0.905856	0.349036	0.150321	0.043656	0.084192	0.040648		76.8	2.84189	2.00091	0.942082	0.364797	0.154112	0.052558	0.03404		76.8	2.66414	1.90807	1.18676	0.598225	0.253655	0.145204	0.061762
	77	1.89034	0.907369	0.349705	0.150521	0.043152	0.083574	0.039895		77	2.8433	2.00323	0.943999	0.365078	0.153939	0.051878	0.033739		77	2.66532	1.90945	1.1881	0.598132	0.253714	0.144779	0.061779
	77.2	1.89269	0.909899	0.350314	0.150495	0.04306	0.08331	0.039714		77.2	2.84511	2.00599	0.946039	0.365778	0.154251	0.052216	0.034007		77.2	2.6663	1.91053	1.18993	0.598806	0.253916	0.14446	0.062094
	77.4	1.89484	0.911926	0.351429	0.150952	0.043438	0.083214	0.039623		77.4	2.84703	2.00874	0.94802	0.366387	0.154862	0.052717	0.034193		77.4	2.66775	1.91176	1.19144	0.59951	0.254619	0.144755	0.062232
	77.6	1.89633	0.913759	0.352021	0.150996	0.043454	0.083046	0.039697		77.6	2.84899	2.01149	0.950457	0.366812	0.154762	0.052918	0.033551		77.6	2.66954	1.9131	1.19276	0.600277	0.255081	0.145111	0.062293
	77.8	1.89875	0.915754	0.352731	0.151134	0.043571	0.083446	0.039741		77.8	2.8508	2.01474	0.952894	0.367674	0.155355	0.053096	0.033443		77.8	2.67004	1.91414	1.19334	0.600831	0.255044	0.145075	0.062457
	78	1.90043	0.917766	0.353244	0.151326	0.043266	0.083209	0.039189		78	2.85218	2.01704	0.954846	0.367698	0.155268	0.052678	0.033387		78	2.67048	1.91515	1.19395	0.601302	0.25537	0.145036	0.062492
	78.2	1.9031	0.920608	0.353764	0.152598	0.043881	0.083698	0.04019		78.2	2.85372	2.01981	0.956828	0.368152	0.155376	0.052863	0.033539		78.2	2.67101	1.91612	1.19464	0.601317	0.255167	0.144932	0.061717
	78.4	1.9049	0.921855	0.35404	0.152702	0.043784	0.083784	0.040281		78.4	2.85518	2.02202	0.958247	0.368974	0.155347	0.052474	0.032621		78.4	2.67232	1.91732	1.19618	0.602869	0.255865	0.145325	0.061913
	78.6	1.90738	0.923768	0.354652	0.1536	0.044067	0.083831	0.040574		78.6	2.85761	2.02451	0.960623	0.370228	0.155288	0.0531	0.032755		78.6	2.67309	1.91814	1.19721	0.603579	0.256097	0.145716	0.061526
	78.8	1.91017	0.925891	0.355638	0.154901	0.044729	0.084192	0.040884		78.8	2.86013	2.02707	0.963271	0.371212	0.155869	0.053558	0.032905		78.8	2.67421	1.91953	1.1985	0.60401	0.25689	0.146255	0.061564
	79	1.91255	0.928177	0.356779	0.155489	0.045234	0.084756	0.041597		79	2.86249	2.02995	0.965498	0.372143	0.156315	0.053937	0.0334		79	2.67591	1.92083	1.19975	0.60499	0.257738	0.147001	0.061934
	79.2	1.91501	0.930019	0.357375	0.156193	0.045507	0.084792	0.041746		79.2	2.86451	2.03277	0.967483	0.372933	0.157175	0.054175	0.03408		79.2	2.67711	1.92199	1.20094	0.605947	0.257959	0.14733	0.06207
	79.4	1.91692	0.931493	0.358104	0.156306	0.045364	0.084528	0.041841		79.4	2.86662	2.03525	0.969837	0.373731	0.157998	0.054576	0.034923		79.4	2.67864	1.92365	1.2022	0.607205	0.258536	0.147978	0.0623
	79.6	1.91942	0.933611	0.35872	0.15687	0.045239	0.084551	0.042347		79.6	2.86832	2.03768	0.971604	0.37428	0.158382	0.054909	0.035006		79.6	2.68028	1.92462	1.2031	0.608087	0.259123	0.148319	0.061992
	79.8	1.92178	0.935517	0.360243	0.157328	0.045563	0.084826	0.042846		79.8	2.87052	2.0405	0.973756	0.375498	0.158675	0.055055	0.035223		79.8	2.68125	1.92519	1.20336	0.608979	0.259405	0.148092	0.06149
	80	1.92363	0.936719	0.360519	0.157269	0.045135	0.084532	0.042389		80	2.87274	2.04335	0.975959	0.376051	0.159328	0.055621	0.035843		80	2.68305	1.92609	1.20396	0.609736	0.260128	0.148125	0.061853
	80.2	1.92596	0.938279	0.361215	0.157055	0.045245	0.084945	0.042561		80.2	2.87466	2.04608	0.978086	0.376641	0.159285	0.056006	0.036051		80.2	2.6841	1.92683	1.20484	0.610549	0.260014	0.147935	0.061454
	80.4	1.92786	0.940247	0.362405	0.157109	0.045053	0.08495	0.042117		80.4	2.87645	2.0487	0.979699	0.377428	0.159483	0.056103	0.036252		80.4	2.68508	1.92773	1.20554	0.610996	0.259667	0.147711	0.061391
	80.6	1.92984	0.941917	0.363418	0.156648	0.045079	0.085462	0.041836		80.6	2.87844	2.05175	0.981768	0.378703	0.160539	0.056407	0.036421		80.6	2.68679	1.92937	1.20684	0.611726	0.260413	0.148173	0.062435
	80.8	1.93151	0.943337	0.36405	0.156689	0.044727	0.085447	0.040988		80.8	2.88075	2.05453	0.984375	0.379978	0.161307	0.05672	0.036713		80.8	2.68795	1.93012	1.20754	0.612445	0.260332	0.148033	0.062227
	81	1.93341	0.944832	0.364475	0.156255	0.044491	0.085527	0.040606		81	2.88223	2.05697	0.986363	0.380719	0.161912	0.056959	0.036735		81	2.68922	1.93106	1.20833	0.612547	0.260576	0.147785	0.062466
	81.2	1.93536	0.946787	0.365215	0.156082	0.044391	0.085721	0.040779		81.2	2.88437	2.05974	0.987972	0.381788	0.16263	0.057306	0.036823		81.2	2.6906	1.93231	1.20989	0.613744	0.261413	0.14795	0.062881
	81.4	1.93714	0.948365	0.366386	0.156408	0.044343	0.085918	0.04072		81.4	2.88659	2.06251	0.990044	0.383013	0.163476	0.05778	0.03633		81.4	2.69195	1.93337	1.2109	0.614582	0.262025	0.148053	0.062597
	81.6	1.93942	0.950816	0.367102	0.157125	0.044461	0.086261	0.040804		81.6	2.88872	2.06549	0.99194	0.384094	0.164189	0.057364	0.036056		81.6	2.69331	1.93437	1.21154	0.615211	0.262297	0.147761	0.062666
	81.8	1.94155	0.952887	0.367928	0.157188	0.044745	0.086605	0.040732		81.8	2.89027	2.06838	0.993608	0.385179	0.164346	0.057182	0.036133		81.8	2.69406	1.93518	1.2121	0.615973	0.262473	0.147756	0.062737
	82	1.94334	0.954698	0.368519	0.157486	0.044851	0.086318	0.040495		82	2.8921	2.0707	0.995065	0.385494	0.164463	0.056774	0.036011		82	2.6957	1.93635	1.21293	0.616457	0.263157	0.14812	0.06298
	82.2	1.94562	0.957077	0.369369	0.158361	0.045382	0.086414	0.041349		82.2	2.89414	2.07315	0.99656	0.386787	0.164965	0.056655	0.036485		82.2	2.69763	1.93762	1.21394	0.617163	0.263525	0.148084	0.063559
	82.4	1.94811	0.959152	0.370673	0.159034	0.046171	0.086656	0.042038		82.4	2.89603	2.07548	0.998344	0.387956	0.164878	0.056323	0.036109		82.4	2.69903	1.93839	1.21473	0.618065	0.263732	0.148039	0.063743
	82.6	1.95056	0.961046	0.371267	0.159893	0.046081	0.086701	0.042195		82.6	2.89801	2.07804	1.0005	0.389361	0.165712	0.057006	0.036529		82.6	2.69978	1.93891	1.21522	0.617951	0.263509	0.147794	0.063114
	82.8	1.95277	0.963611	0.372808	0.16109	0.046695	0.087476	0.042843		82.8	2.90008	2.08041	1.00232	0.390148	0.166027	0.057286	0.037049		82.8	2.7013	1.93992	1.21624	0.618978	0.263754	0.14785	0.063215
	83	1.95502	0.966206	0.373431	0.161808	0.046832	0.088019	0.043414		83	2.9013	2.08269	1.00392	0.39099	0.165941	0.057194	0.037007		83	2.70334	1.94145	1.21747	0.619594	0.26433	0.148344	0.063769
	83.2	1.95692	0.968075	0.374098	0.162037	0.046991	0.088003	0.043583		83.2	2.90317	2.08499	1.00574	0.392086	0.166943	0.057317	0.036815		83.2	2.7049	1.94309	1.21899	0.620581	0.264505	0.148812	0.063638
	83.4	1.95887	0.969306	0.374657	0.162078	0.046646	0.087486	0.043647		83.4	2.9048	2.08752	1.00757	0.392901	0.167139	0.057587	0.036868		83.4	2.70587	1.94377	1.21988	0.621447	0.264644	0.148858	0.063288
	83.6	1.96119	0.970999	0.375153	0.16228	0.046898	0.087433	0.044034		83.6	2.9061	2.08982	1.00975	0.393669	0.1673	0.057959	0.036557		83.6	2.7071	1.94484	1.22054	0.622341	0.265096	0.148813	0.063233
	83.8	1.96331	0.972414	0.376156	0.162523	0.046912	0.087474	0.044522		83.8	2.90797	2.09239	1.01168	0.395156	0.16755	0.058245	0.037354		83.8	2.70809	1.94577	1.22137	0.622484	0.26515	0.148846	0.063112
	84	1.96538	0.973787	0.376804	0.162583	0.04664	0.087337	0.043978		84	2.90942	2.09467	1.0138	0.395866	0.167638	0.058388	0.038019		84	2.70905	1.94691	1.22195	0.622664	0.265014	0.149353	0.063445
	84.2	1.96749	0.976137	0.377953	0.163115	0.047023	0.088046	0.044388		84.2	2.91141	2.09744	1.0162	0.39747	0.16823	0.059087	0.038359		84.2	2.70986	1.94771	1.22284	0.622938	0.264507	0.149371	0.063264
	84.4	1.96962	0.977606	0.378719	0.163156	0.046597	0.088163	0.044268		84.4	2.91353	2.09951	1.01836	0.39834	0.168708	0.059166	0.038923		84.4	2.71108	1.94824	1.22372	0.623434	0.264589	0.149856	0.063432
	84.6	1.97172	0.978988	0.379637	0.163505	0.046318	0.088346	0.044081		84.6	2.91499	2.10201	1.0209	0.399176	0.169157	0.059158	0.038706		84.6	2.71286	1.9496	1.22517	0.62447	0.265237	0.150643	0.063855
	84.8	1.97401	0.980553	0.38059	0.163593	0.046227	0.088699	0.043372		84.8	2.91636	2.10371	1.02306	0.399682	0.169404	0.058927	0.038875		84.8	2.71366	1.95019	1.22583	0.624931	0.265131	0.150457	0.063411
	85	1.97592	0.981483	0.381138	0.163125	0.045796	0.088304	0.04321		85	2.91813	2.10615	1.02509	0.400362	0.169678	0.058943	0.038999		85	2.71444	1.95119	1.22702	0.625673	0.265734	0.151134	0.06369
	85.2	1.97783	0.982842	0.382023	0.163504	0.04523	0.088288	0.042697		85.2	2.9197	2.10843	1.02673	0.401115	0.169701	0.05855	0.039211		85.2	2.71547	1.95261	1.22833	0.626453	0.266647	0.151397	0.063605
	85.4	1.98026	0.984317	0.383076	0.163576	0.045316	0.088464	0.042768		85.4	2.92162	2.11117	1.02918	0.401969	0.170202	0.058686	0.039214		85.4	2.71653	1.95371	1.22897	0.627091	0.267164	0.151566	0.063394
	85.6	1.98223	0.986204	0.384134	0.163818	0.045223	0.088347	0.042782		85.6	2.92347	2.11409	1.03126	0.402968	0.170285	0.058483	0.039241		85.6	2.71773	1.95444	1.22974	0.627574	0.267407	0.151496	0.063429
	85.8	1.98394	0.987959	0.385049	0.163998	0.045302	0.088323	0.04293		85.8	2.92514	2.11684	1.03303	0.403809	0.17077	0.058683	0.039831		85.8	2.71943	1.95562	1.23082	0.628699	0.267904	0.151749	0.063742
	86	1.98571	0.98981	0.385926	0.164153	0.045336	0.088281	0.043262		86	2.92713	2.11896	1.03458	0.404056	0.171194	0.058324	0.039901		86	2.72106	1.95695	1.2317	0.629633	0.26875	0.151921	0.064006
	86.2	1.98752	0.992151	0.386567	0.164438	0.04598	0.088378	0.043567		86.2	2.92889	2.12134	1.03674	0.405276	0.171538	0.058763	0.039875		86.2	2.72187	1.95765	1.23223	0.630309	0.268693	0.151628	0.063846
	86.4	1.98988	0.994686	0.387893	0.164726	0.046465	0.088911	0.043617		86.4	2.93025	2.12389	1.0386	0.406158	0.172022	0.059147	0.039567		86.4	2.72301	1.9584	1.23367	0.631571	0.268769	0.151812	0.063613
	86.6	1.99165	0.997158	0.388926	0.165211	0.046653	0.089144	0.044002		86.6	2.93191	2.12623	1.04038	0.407215	0.17228	0.059569	0.039434		86.6	2.72482	1.95943	1.23484	0.632664	0.268996	0.151986	0.064202
	86.8	1.99357	0.99968	0.390309	0.165708	0.047356	0.089149	0.043926		86.8	2.93332	2.12823	1.04232	0.407566	0.172188	0.059479	0.038795		86.8	2.72659	1.96077	1.23653	0.63398	0.269608	0.152191	0.064736
	87	1.99543	1.00175	0.391251	0.166225	0.047976	0.089452	0.044484		87	2.93454	2.13078	1.04427	0.408475	0.172819	0.059412	0.038339		87	2.72821	1.9621	1.23792	0.63518	0.270201	0.152819	0.065279
	87.2	1.99697	1.00328	0.391626	0.166178	0.048304	0.089184	0.044531		87.2	2.9364	2.13344	1.04656	0.40941	0.173524	0.060017	0.037856		87.2	2.72903	1.96296	1.23879	0.636593	0.270522	0.153045	0.065686
	87.4	1.99904	1.00499	0.392051	0.166884	0.048624	0.089131	0.044713		87.4	2.93768	2.13592	1.04838	0.410248	0.173798	0.060682	0.037865		87.4	2.72993	1.96392	1.23977	0.636984	0.271143	0.153149	0.065492
	87.6	2.00106	1.00733	0.392804	0.167287	0.049481	0.089645	0.045054		87.6	2.93961	2.13793	1.0503	0.411362	0.173893	0.060604	0.037938		87.6	2.73099	1.96531	1.24063	0.637781	0.271674	0.153875	0.066
	87.8	2.00302	1.00952	0.393629	0.167953	0.049955	0.089951	0.045428		87.8	2.94186	2.14034	1.05248	0.413068	0.174302	0.061198	0.038497		87.8	2.73233	1.96655	1.24161	0.637602	0.272546	0.15427	0.066585
	88	2.00504	1.01164	0.39474	0.168606	0.050478	0.090234	0.045296		88	2.94364	2.1425	1.05452	0.413938	0.174808	0.061896	0.038738		88	2.73343	1.96739	1.24262	0.638256	0.272884	0.154524	0.067063
	88.2	2.00618	1.0134	0.395474	0.16908	0.05023	0.090105	0.045578		88.2	2.94523	2.14513	1.05614	0.414622	0.17505	0.062394	0.03861		88.2	2.73469	1.96829	1.24377	0.638615	0.27332	0.154688	0.067311
	88.4	2.00784	1.01464	0.395509	0.169273	0.0498	0.089729	0.045178		88.4	2.94619	2.14713	1.05822	0.415097	0.175321	0.062057	0.038234		88.4	2.73606	1.96964	1.24481	0.639181	0.273828	0.155328	0.067736
	88.6	2.00939	1.01643	0.396424	0.16985	0.049669	0.089642	0.04459		88.6	2.94738	2.14934	1.05964	0.416172	0.176007	0.061846	0.037998		88.6	2.73733	1.97076	1.24553	0.639801	0.274595	0.155921	0.068054
	88.8	2.0111	1.01831	0.397144	0.170028	0.049398	0.089511	0.044658		88.8	2.94881	2.15139	1.06113	0.416395	0.17639	0.061586	0.038409		88.8	2.73819	1.97149	1.24617	0.640199	0.275067	0.155841	0.068084
	89	2.01312	1.02001	0.397993	0.170617	0.049243	0.089145	0.045		89	2.95022	2.15358	1.06248	0.417104	0.176462	0.061274	0.038344		89	2.73945	1.97219	1.24704	0.640268	0.275806	0.156222	0.067828
	89.2	2.01511	1.02181	0.399087	0.17121	0.049238	0.089752	0.045258		89.2	2.95167	2.15574	1.06374	0.417898	0.176633	0.061109	0.038927		89.2	2.74043	1.97302	1.24779	0.640466	0.27618	0.155845	0.067173
	89.4	2.0169	1.02338	0.400244	0.171109	0.049367	0.090227	0.045481		89.4	2.95329	2.15845	1.06527	0.41847	0.176904	0.061316	0.038985		89.4	2.74172	1.97412	1.24863	0.640873	0.276215	0.156	0.06725
	89.6	2.01886	1.02557	0.401569	0.171918	0.049709	0.090726	0.045263		89.6	2.95486	2.16102	1.06662	0.419018	0.177099	0.061207	0.039047		89.6	2.7431	1.97535	1.24981	0.641542	0.276502	0.156111	0.067122
	89.8	2.02093	1.02758	0.40275	0.17246	0.049933	0.091479	0.04563		89.8	2.9563	2.16283	1.06794	0.419396	0.177656	0.060887	0.039386		89.8	2.74443	1.97657	1.25076	0.642214	0.276685	0.15615	0.067128
	90	2.02278	1.02917	0.403743	0.172415	0.050104	0.091971	0.045112		90	2.95787	2.16541	1.07015	0.420005	0.178143	0.06144	0.039345		90	2.74571	1.97748	1.25156	0.642774	0.276697	0.155842	0.066954
	90.2	2.02466	1.03147	0.404538	0.172714	0.050927	0.092445	0.04485		90.2	2.95921	2.16766	1.07218	0.421493	0.178337	0.062037	0.039205		90.2	2.74701	1.97838	1.2525	0.644007	0.276297	0.156071	0.067168
	90.4	2.02725	1.03393	0.40612	0.173239	0.051067	0.093048	0.045226		90.4	2.96096	2.17025	1.07424	0.422398	0.178455	0.061987	0.039561		90.4	2.74813	1.97932	1.25391	0.644658	0.275828	0.156341	0.067114
	90.6	2.02878	1.03568	0.407074	0.173257	0.050986	0.093021	0.045388		90.6	2.96196	2.17234	1.07602	0.422909	0.178539	0.061782	0.039644		90.6	2.74918	1.98005	1.25448	0.644953	0.275282	0.155839	0.067104
	90.8	2.03044	1.0366	0.407419	0.173229	0.051404	0.092969	0.044179		90.8	2.96371	2.17476	1.07824	0.424356	0.179356	0.061821	0.040025		90.8	2.74986	1.98073	1.25591	0.645459	0.27495	0.155636	0.066442
	91	2.03201	1.03811	0.407255	0.173039	0.051596	0.093313	0.044248		91	2.9659	2.17718	1.08062	0.425485	0.179877	0.062368	0.040472		91	2.75083	1.98153	1.25696	0.646419	0.274854	0.155589	0.06643
	91.2	2.03358	1.03974	0.407356	0.172706	0.051717	0.093147	0.043657		91.2	2.96837	2.17957	1.08275	0.426756	0.180565	0.063433	0.04066		91.2	2.75193	1.98278	1.2581	0.647051	0.275016	0.155864	0.066686
	91.4	2.03555	1.04165	0.407823	0.173097	0.051965	0.093299	0.043535		91.4	2.97023	2.1817	1.08464	0.427629	0.180898	0.063681	0.040519		91.4	2.75285	1.98402	1.25922	0.647117	0.27501	0.155556	0.066021
	91.6	2.03771	1.04339	0.408365	0.173106	0.051938	0.092719	0.043505		91.6	2.97217	2.18389	1.08714	0.428956	0.181242	0.063921	0.040557		91.6	2.75396	1.98459	1.25972	0.647906	0.275054	0.155105	0.066025
	91.8	2.04031	1.04544	0.409518	0.173804	0.052489	0.092992	0.04394		91.8	2.97389	2.1862	1.08895	0.43001	0.181985	0.064702	0.040925		91.8	2.75498	1.9854	1.26002	0.647889	0.275501	0.154285	0.066104
	92	2.04158	1.04716	0.410135	0.173777	0.05197	0.092754	0.044142		92	2.97517	2.18806	1.09066	0.430725	0.1821	0.064633	0.040755		92	2.75577	1.9862	1.2607	0.648796	0.275929	0.154303	0.065852
	92.2	2.04256	1.04888	0.410869	0.173692	0.051382	0.092239	0.044224		92.2	2.97652	2.1907	1.09265	0.432053	0.182603	0.06467	0.040087		92.2	2.75651	1.9872	1.26102	0.649329	0.276098	0.1545	0.065765
	92.4	2.04431	1.05096	0.411693	0.174366	0.051508	0.092206	0.044504		92.4	2.97852	2.19309	1.09504	0.433674	0.183827	0.06478	0.039768		92.4	2.75765	1.98842	1.26159	0.650043	0.276715	0.15501	0.066171
	92.6	2.04557	1.0528	0.412705	0.174583	0.051213	0.091969	0.045251		92.6	2.98055	2.19525	1.0969	0.434676	0.184207	0.065056	0.039823		92.6	2.75869	1.98904	1.26259	0.650803	0.277175	0.155314	0.066206
	92.8	2.04758	1.05444	0.414046	0.175275	0.051259	0.092248	0.04616		92.8	2.98133	2.19724	1.09818	0.434756	0.183963	0.064742	0.039409		92.8	2.75992	1.9897	1.26365	0.651416	0.277588	0.155475	0.066023
	93	2.04966	1.05689	0.415536	0.176294	0.051701	0.093112	0.046652		93	2.98261	2.19912	1.09911	0.435581	0.183763	0.065164	0.039746		93	2.76092	1.99042	1.26426	0.651637	0.278016	0.155826	0.065866
	93.2	2.05176	1.05879	0.416367	0.176869	0.052309	0.093871	0.047346		93.2	2.98433	2.20153	1.10147	0.436572	0.184139	0.065334	0.040551		93.2	2.7621	1.9918	1.26542	0.653142	0.278355	0.15665	0.06665
	93.4	2.05408	1.06077	0.417896	0.177467	0.052524	0.094516	0.047522		93.4	2.98558	2.20367	1.10369	0.437097	0.184436	0.065621	0.040694		93.4	2.76383	1.99315	1.2667	0.654657	0.279001	0.157777	0.067697
	93.6	2.0564	1.06265	0.419168	0.178627	0.05289	0.094914	0.048196		93.6	2.98679	2.20539	1.10541	0.437361	0.184578	0.065453	0.04086		93.6	2.7652	1.99486	1.26769	0.656149	0.280031	0.158676	0.068677
	93.8	2.05831	1.06414	0.419988	0.179127	0.052975	0.095304	0.048628		93.8	2.98785	2.20747	1.10714	0.438144	0.184568	0.065252	0.040996		93.8	2.76601	1.99582	1.26855	0.656907	0.280579	0.159093	0.069229
	94	2.06002	1.06567	0.420877	0.17962	0.05358	0.095584	0.048553		94	2.98907	2.20976	1.109	0.438954	0.184964	0.06526	0.041449		94	2.7671	1.99667	1.26981	0.657801	0.280485	0.15947	0.068993
	94.2	2.06167	1.06718	0.421103	0.179823	0.053387	0.095575	0.048515		94.2	2.99021	2.21136	1.11053	0.439692	0.185113	0.064431	0.041691		94.2	2.76816	1.99823	1.27091	0.659312	0.281037	0.160623	0.069608
	94.4	2.06389	1.06857	0.421773	0.179982	0.053815	0.095763	0.048674		94.4	2.99182	2.21405	1.1131	0.44039	0.185418	0.064298	0.042233		94.4	2.7684	1.99917	1.27196	0.659298	0.281037	0.160611	0.06931
	94.6	2.06528	1.06955	0.422239	0.179602	0.054115	0.095373	0.047971		94.6	2.99308	2.216	1.11471	0.441572	0.186331	0.064236	0.042448		94.6	2.76982	2.0008	1.27368	0.659966	0.281526	0.160905	0.069818
	94.8	2.06725	1.07089	0.422438	0.179834	0.054648	0.095123	0.047398		94.8	2.99511	2.21855	1.11654	0.442918	0.186872	0.064526	0.043163		94.8	2.77123	2.00242	1.27496	0.660775	0.282272	0.161241	0.070316
	95	2.06889	1.07261	0.422857	0.17978	0.054632	0.095092	0.047228		95	2.99676	2.22072	1.11808	0.443536	0.187022	0.064842	0.042984		95	2.77262	2.00415	1.27612	0.662125	0.283274	0.161469	0.070641
	95.2	2.07054	1.07404	0.423778	0.179848	0.054521	0.094497	0.046539		95.2	2.99825	2.22305	1.11962	0.444448	0.187258	0.064841	0.042955		95.2	2.77399	2.00483	1.27686	0.662	0.283334	0.161624	0.070202
	95.4	2.07217	1.07594	0.424312	0.180615	0.054278	0.094056	0.046278		95.4	2.99914	2.22513	1.12153	0.444832	0.187703	0.064642	0.04252		95.4	2.77499	2.00533	1.27697	0.662075	0.283122	0.160996	0.0696
	95.6	2.07416	1.07765	0.425425	0.180886	0.054649	0.094118	0.046314		95.6	3.00045	2.22717	1.12359	0.445998	0.187918	0.064638	0.04271		95.6	2.7766	2.00638	1.27763	0.662254	0.28388	0.160915	0.069432
	95.8	2.07605	1.07943	0.426375	0.181039	0.054584	0.094473	0.046039		95.8	3.00234	2.22961	1.12519	0.447539	0.188285	0.064716	0.043196		95.8	2.77805	2.00749	1.27821	0.662313	0.284662	0.160979	0.069448
	96	2.07656	1.08077	0.426938	0.180787	0.054189	0.093959	0.04571		96	3.00386	2.23169	1.12729	0.44827	0.188701	0.065041	0.042626		96	2.77918	2.00821	1.27896	0.662687	0.285393	0.161065	0.068969
	96.2	2.07789	1.08238	0.42775	0.180983	0.054326	0.094029	0.045591		96.2	3.0056	2.23455	1.12895	0.449418	0.189691	0.065687	0.042287		96.2	2.7805	2.009	1.27986	0.662574	0.285302	0.161045	0.068894
	96.4	2.07924	1.08374	0.428733	0.181267	0.054048	0.094121	0.045478		96.4	3.00734	2.23697	1.13117	0.450331	0.1897	0.065796	0.042077		96.4	2.78151	2.00962	1.28066	0.662687	0.285259	0.161007	0.068498
	96.6	2.08023	1.08499	0.429344	0.181628	0.053686	0.094023	0.045453		96.6	3.00924	2.23935	1.13319	0.450722	0.190192	0.066339	0.04247		96.6	2.78277	2.01043	1.28135	0.663013	0.285651	0.161236	0.06827
	96.8	2.08162	1.08701	0.430377	0.182346	0.053645	0.094851	0.045598		96.8	3.01122	2.24212	1.13506	0.45165	0.190959	0.067072	0.042394		96.8	2.7843	2.0111	1.28198	0.663666	0.286216	0.161522	0.068413
	97	2.083	1.08942	0.431042	0.183127	0.053593	0.094874	0.045485		97	3.0135	2.24451	1.13792	0.453131	0.191589	0.067979	0.04294		97	2.78528	2.01134	1.28243	0.664	0.286264	0.161485	0.068525
	97.2	2.08516	1.09156	0.43164	0.183545	0.05405	0.094979	0.046025		97.2	3.0151	2.24644	1.14044	0.453597	0.192301	0.068159	0.043113		97.2	2.7868	2.01239	1.28373	0.665088	0.28688	0.162328	0.069535
	97.4	2.08628	1.09318	0.432651	0.184126	0.053672	0.095484	0.046323		97.4	3.01677	2.24855	1.14223	0.454143	0.192407	0.068362	0.043174		97.4	2.78754	2.01279	1.28424	0.665767	0.286864	0.162661	0.069546
	97.6	2.08803	1.09495	0.433266	0.185105	0.053882	0.095745	0.047406		97.6	3.01802	2.25037	1.1435	0.454762	0.192888	0.068325	0.042919		97.6	2.78866	2.01376	1.28522	0.666357	0.287627	0.16287	0.069909
	97.8	2.0896	1.09651	0.433751	0.185566	0.054074	0.096233	0.047625		97.8	3.01926	2.25219	1.14535	0.455776	0.193606	0.068065	0.043056		97.8	2.78931	2.01427	1.28564	0.667054	0.287576	0.162983	0.069665
	98	2.0908	1.09813	0.433705	0.18567	0.054108	0.096018	0.047521		98	3.02088	2.25378	1.14767	0.456812	0.194245	0.067849	0.042635		98	2.78986	2.01465	1.2858	0.667613	0.287182	0.162946	0.069335
	98.2	2.09269	1.09979	0.433954	0.185684	0.054282	0.09598	0.04765		98.2	3.02255	2.25583	1.14973	0.458077	0.194906	0.068263	0.042346		98.2	2.79102	2.01581	1.28641	0.668873	0.287991	0.163223	0.069978
	98.4	2.0947	1.10185	0.434425	0.186043	0.054812	0.095892	0.048183		98.4	3.02403	2.25814	1.15133	0.459045	0.195335	0.069155	0.042062		98.4	2.79135	2.01684	1.28712	0.669404	0.288308	0.162944	0.070314
	98.6	2.09668	1.10372	0.435279	0.186221	0.054984	0.095842	0.048329		98.6	3.02524	2.25978	1.15265	0.460453	0.195868	0.069207	0.042052		98.6	2.79282	2.01783	1.288	0.670475	0.289097	0.163205	0.070745
	98.8	2.09898	1.10592	0.436289	0.18687	0.055132	0.096003	0.049178		98.8	3.02639	2.26165	1.1533	0.461179	0.19577	0.069156	0.041882		98.8	2.79451	2.01872	1.28874	0.671814	0.289584	0.163387	0.070986
	99	2.10048	1.10716	0.436961	0.186907	0.054844	0.0961	0.049017		99	3.02722	2.26321	1.15431	0.461963	0.195909	0.069046	0.041498		99	2.79604	2.01973	1.28973	0.67331	0.289973	0.16398	0.07114
	99.2	2.10231	1.10884	0.43768	0.18717	0.054833	0.095991	0.049006		99.2	3.02832	2.2654	1.15635	0.46293	0.196021	0.069058	0.041415		99.2	2.79733	2.02028	1.29083	0.67372	0.290094	0.164099	0.071363
	99.4	2.10447	1.11129	0.439196	0.188153	0.055392	0.096466	0.049588		99.4	3.02926	2.26698	1.1577	0.463378	0.19633	0.069126	0.041229		99.4	2.79853	2.02102	1.2919	0.674813	0.290095	0.164258	0.071301
	99.6	2.10694	1.11365	0.440889	0.188696	0.056231	0.097305	0.050184		99.6	3.03051	2.26837	1.15897	0.464537	0.195809	0.068757	0.041551		99.6	2.79994	2.02252	1.29319	0.675413	0.290786	0.164867	0.071874
	99.8	2.10898	1.11523	0.441884	0.189107	0.056152	0.09704	0.050257		99.8	3.03185	2.27048	1.16081	0.46573	0.195879	0.069074	0.041461		99.8	2.8011	2.02346	1.29424	0.676484	0.291288	0.165264	0.071857
	100	2.1101	1.11679	0.442805	0.189322	0.056312	0.096876	0.050158		100	3.03302	2.27239	1.16225	0.466014	0.196228	0.069286	0.041086		100	2.80203	2.02412	1.29489	0.676986	0.291271	0.165231	0.071577
	100.2	2.11175	1.11876	0.443868	0.189268	0.056006	0.097209	0.050113		100.2	3.03426	2.27428	1.16359	0.466673	0.196126	0.06924	0.040823		100.2	2.80333	2.02529	1.29622	0.677454	0.291321	0.164928	0.071484
	100.4	2.11342	1.12063	0.445422	0.189699	0.055942	0.097249	0.049882		100.4	3.0359	2.27625	1.16577	0.467307	0.196036	0.06921	0.04052		100.4	2.80393	2.02563	1.29644	0.677663	0.29067	0.164748	0.070441
	100.6	2.11471	1.1221	0.446202	0.189799	0.055897	0.097111	0.049645		100.6	3.03796	2.27855	1.16741	0.467605	0.196166	0.069229	0.040645		100.6	2.80553	2.02744	1.2977	0.678763	0.291264	0.165095	0.070651
	100.8	2.11643	1.12411	0.447201	0.189988	0.056038	0.097414	0.049557		100.8	3.03941	2.28066	1.16942	0.468437	0.196081	0.069334	0.040435		100.8	2.80686	2.02846	1.2989	0.679287	0.291568	0.165279	0.070882
	101	2.11832	1.12584	0.448046	0.190136	0.056269	0.097179	0.048846		101	3.04072	2.28275	1.17179	0.468969	0.196099	0.069456	0.040475		101	2.80789	2.02948	1.29954	0.679576	0.292009	0.165135	0.071427
	101.2	2.11997	1.12704	0.448957	0.189848	0.056461	0.09769	0.048339		101.2	3.04221	2.28477	1.17333	0.469478	0.196435	0.069774	0.04068		101.2	2.80897	2.03058	1.30045	0.67939	0.292131	0.165456	0.07164
	101.4	2.12121	1.12821	0.449929	0.190314	0.056499	0.098202	0.048277		101.4	3.04387	2.2872	1.17536	0.470275	0.196997	0.069967	0.040675		101.4	2.81047	2.03178	1.30129	0.679771	0.292363	0.165826	0.071675
	101.6	2.1228	1.12973	0.450279	0.190608	0.05655	0.098432	0.048183		101.6	3.04521	2.28883	1.1772	0.470854	0.197342	0.069545	0.040673		101.6	2.81188	2.03274	1.30195	0.680196	0.292998	0.165903	0.071891
	101.8	2.12379	1.13091	0.450245	0.190237	0.055989	0.098239	0.047361		101.8	3.04681	2.29068	1.17948	0.471559	0.197927	0.069512	0.04078		101.8	2.81265	2.03396	1.30216	0.680606	0.292926	0.166173	0.071762
	102	2.12492	1.13277	0.449821	0.19025	0.056196	0.097965	0.046853		102	3.04854	2.29266	1.18184	0.472573	0.198659	0.070095	0.04101		102	2.81354	2.03456	1.30241	0.680002	0.292508	0.166017	0.071355
	102.2	2.12708	1.13437	0.450592	0.190798	0.056503	0.098355	0.047138		102.2	3.05013	2.29442	1.18368	0.473376	0.199109	0.070432	0.041231		102.2	2.81452	2.03561	1.30285	0.680236	0.292709	0.165841	0.071324
	102.4	2.12816	1.13569	0.450669	0.190999	0.055772	0.097882	0.046848		102.4	3.05144	2.29627	1.18555	0.47455	0.199884	0.070959	0.041628		102.4	2.81496	2.03673	1.3034	0.680221	0.29273	0.165811	0.071306
	102.6	2.13076	1.13764	0.451846	0.191592	0.056793	0.098111	0.047462		102.6	3.05234	2.2977	1.18739	0.475571	0.200209	0.070694	0.041857		102.6	2.816	2.03751	1.30378	0.680788	0.292671	0.166139	0.07111
	102.8	2.13252	1.13917	0.452836	0.19146	0.056754	0.098194	0.048039		102.8	3.05323	2.29928	1.18881	0.475907	0.200455	0.070681	0.041642		102.8	2.81739	2.03827	1.30478	0.681306	0.292601	0.166254	0.070635
	103	2.13364	1.14034	0.453642	0.191681	0.056886	0.098273	0.047798		103	3.054	2.30125	1.19128	0.476995	0.201414	0.071214	0.042168		103	2.81797	2.03888	1.30506	0.681824	0.292672	0.166213	0.070491
	103.2	2.13563	1.14266	0.455192	0.19256	0.057777	0.098673	0.048886		103.2	3.05547	2.30355	1.19344	0.478284	0.202238	0.071725	0.042344		103.2	2.81854	2.03937	1.3056	0.682358	0.293055	0.166415	0.070256
	103.4	2.13733	1.14527	0.456507	0.193617	0.058553	0.099062	0.049933		103.4	3.05632	2.30478	1.19483	0.47908	0.202072	0.071423	0.042098		103.4	2.81906	2.04008	1.30618	0.682886	0.293043	0.166642	0.07014
	103.6	2.13889	1.14717	0.45731	0.194371	0.0583	0.098911	0.049934		103.6	3.05774	2.30675	1.19669	0.480489	0.202602	0.0716	0.042473		103.6	2.82014	2.04141	1.30676	0.683448	0.293621	0.167317	0.070674
	103.8	2.14058	1.14875	0.458021	0.19486	0.058367	0.098689	0.050325		103.8	3.05873	2.30861	1.19825	0.481688	0.203227	0.071454	0.042531		103.8	2.821	2.04166	1.3076	0.684266	0.294144	0.16732	0.070755
	104	2.14177	1.15062	0.458907	0.19514	0.058551	0.098693	0.050645		104	3.0597	2.31069	1.1995	0.482723	0.203515	0.071407	0.042106		104	2.822	2.04225	1.30838	0.684869	0.294456	0.166903	0.070543
	104.2	2.14356	1.15258	0.460306	0.195332	0.058406	0.098777	0.051012		104.2	3.06053	2.31248	1.20078	0.483537	0.203804	0.071279	0.041785		104.2	2.82274	2.04248	1.3095	0.685511	0.294774	0.166731	0.070478
	104.4	2.14541	1.15397	0.461303	0.196017	0.058987	0.098769	0.051293		104.4	3.06201	2.31501	1.20224	0.484982	0.204332	0.071457	0.042051		104.4	2.82325	2.04262	1.30971	0.685762	0.294681	0.167166	0.070127
	104.6	2.14741	1.15574	0.462242	0.196563	0.059584	0.099066	0.051722		104.6	3.0634	2.31718	1.20357	0.485543	0.204135	0.071204	0.041636		104.6	2.82463	2.04321	1.31086	0.68684	0.295503	0.167589	0.070546
	104.8	2.14854	1.15673	0.462629	0.196564	0.059047	0.099074	0.050962		104.8	3.06494	2.31966	1.20564	0.486477	0.204697	0.07144	0.041901		104.8	2.82571	2.04365	1.31163	0.686999	0.29626	0.168084	0.070927
	105	2.15027	1.15774	0.463501	0.196348	0.059031	0.099574	0.050834		105	3.06585	2.32184	1.20736	0.487627	0.205065	0.071736	0.041694		105	2.82735	2.04461	1.31237	0.687655	0.296712	0.168273	0.071404
	105.2	2.15123	1.15884	0.464434	0.196525	0.059136	0.100023	0.050681		105.2	3.0673	2.32406	1.2089	0.488723	0.205539	0.072152	0.04155		105.2	2.82911	2.04567	1.31347	0.688169	0.296993	0.168507	0.071316
	105.4	2.1523	1.16039	0.464921	0.196534	0.058848	0.100521	0.050699		105.4	3.06878	2.32619	1.21005	0.489244	0.205936	0.071843	0.041955		105.4	2.83114	2.0472	1.31498	0.688905	0.297424	0.168993	0.072073
	105.6	2.15356	1.16193	0.465165	0.196627	0.058505	0.101062	0.050291		105.6	3.07007	2.32783	1.21148	0.489597	0.205658	0.071362	0.042116		105.6	2.8327	2.04849	1.31586	0.68972	0.297795	0.169085	0.072053
	105.8	2.15524	1.16385	0.465762	0.196914	0.058495	0.101351	0.050487		105.8	3.07159	2.32976	1.21379	0.490572	0.20646	0.071737	0.042414		105.8	2.83378	2.04867	1.31629	0.689547	0.297503	0.16871	0.071621
	106	2.15656	1.16493	0.465925	0.196762	0.058288	0.10146	0.050273		106	3.07307	2.3311	1.21605	0.491934	0.206849	0.072351	0.043025		106	2.83469	2.04927	1.31646	0.689532	0.297203	0.168668	0.071452
	106.2	2.15788	1.16629	0.466535	0.196814	0.057698	0.101595	0.049724		106.2	3.07456	2.33286	1.21814	0.493127	0.207629	0.072694	0.043472		106.2	2.83598	2.05067	1.31688	0.690497	0.297862	0.168502	0.0715
	106.4	2.15925	1.16826	0.467185	0.19665	0.057757	0.101315	0.049837		106.4	3.07584	2.33446	1.21997	0.494068	0.208277	0.073175	0.043722		106.4	2.83714	2.0522	1.31829	0.691158	0.297874	0.168672	0.071572
	106.6	2.16129	1.17035	0.468066	0.196712	0.058367	0.101597	0.050329		106.6	3.07679	2.33627	1.22202	0.494874	0.208843	0.073723	0.044216		106.6	2.83769	2.05237	1.31832	0.691541	0.297567	0.168554	0.071081
	106.8	2.16214	1.17129	0.468697	0.196099	0.057654	0.101321	0.049939		106.8	3.07791	2.33813	1.2247	0.495985	0.209824	0.074193	0.044506		106.8	2.83905	2.05287	1.31935	0.692535	0.298011	0.168733	0.070978
	107	2.16379	1.17289	0.46949	0.196484	0.05806	0.101515	0.050378		107	3.0796	2.3402	1.22698	0.497096	0.210272	0.074647	0.044854		107	2.83982	2.05409	1.32012	0.693311	0.298207	0.168922	0.071153
	107.2	2.16534	1.17478	0.469967	0.196918	0.057794	0.101334	0.050547		107.2	3.08138	2.34202	1.2288	0.4977	0.210428	0.074954	0.044668		107.2	2.84028	2.05518	1.32065	0.694099	0.298597	0.169339	0.071006
	107.4	2.1668	1.17655	0.470407	0.197983	0.05775	0.1015	0.050152		107.4	3.08314	2.34398	1.23088	0.498824	0.211093	0.075194	0.04493		107.4	2.84126	2.05655	1.32139	0.69498	0.29917	0.168861	0.071758
	107.6	2.16877	1.17821	0.471449	0.198664	0.057587	0.101117	0.050034		107.6	3.08482	2.34584	1.23259	0.499949	0.211784	0.075908	0.04531		107.6	2.84281	2.05761	1.32255	0.69636	0.300189	0.169088	0.072413
	107.8	2.17059	1.18004	0.472394	0.199466	0.058358	0.101293	0.05053		107.8	3.08641	2.34793	1.23482	0.501314	0.212512	0.076284	0.045676		107.8	2.84386	2.05829	1.32321	0.697354	0.300879	0.168894	0.072657
	108	2.17172	1.18162	0.473043	0.199692	0.05851	0.101075	0.050185		108	3.0879	2.35015	1.23669	0.502732	0.213215	0.076899	0.045504		108	2.84471	2.05944	1.32351	0.698015	0.301264	0.168412	0.072519
	108.2	2.17324	1.18311	0.474043	0.200086	0.058377	0.100866	0.050293		108.2	3.08911	2.35188	1.23804	0.503129	0.213673	0.076777	0.045357		108.2	2.8453	2.0599	1.32438	0.698768	0.301482	0.168726	0.07282
	108.4	2.17495	1.18501	0.475361	0.201066	0.058771	0.100813	0.050345		108.4	3.09021	2.35335	1.23926	0.503828	0.213795	0.076492	0.045195		108.4	2.84581	2.06036	1.32526	0.69927	0.301919	0.169068	0.072739
	108.6	2.17652	1.18684	0.476224	0.201485	0.058505	0.100702	0.050535		108.6	3.09101	2.35509	1.2407	0.504222	0.213837	0.075909	0.044486		108.6	2.84693	2.06064	1.32625	0.699927	0.301891	0.168976	0.072637
	108.8	2.17809	1.18838	0.477166	0.201892	0.058481	0.101117	0.050418		108.8	3.09137	2.35655	1.24221	0.504778	0.213493	0.075414	0.044182		108.8	2.84803	2.06207	1.32713	0.70083	0.301931	0.16922	0.072695
	109	2.17958	1.19012	0.478341	0.202296	0.059089	0.101318	0.050729		109	3.09184	2.35797	1.24303	0.505838	0.213746	0.07548	0.043977		109	2.84983	2.06358	1.32852	0.701493	0.302292	0.169549	0.07299
	109.2	2.18005	1.19173	0.478878	0.202323	0.058776	0.100937	0.050553		109.2	3.09331	2.36006	1.24386	0.506071	0.214174	0.075529	0.044367		109.2	2.85113	2.06464	1.32924	0.702297	0.302756	0.169624	0.073631
	109.4	2.18173	1.19391	0.480049	0.202316	0.058877	0.101733	0.050895		109.4	3.09451	2.36202	1.2454	0.506948	0.214678	0.075095	0.04446		109.4	2.85187	2.06524	1.32977	0.702356	0.302803	0.169576	0.073852
	109.6	2.18335	1.19532	0.480639	0.202557	0.058864	0.101881	0.050795		109.6	3.09492	2.36334	1.24694	0.50713	0.214329	0.074602	0.043938		109.6	2.85285	2.0663	1.33008	0.70274	0.302933	0.169598	0.073524
	109.8	2.18445	1.19687	0.481186	0.202806	0.059012	0.101691	0.051107		109.8	3.09623	2.36494	1.24892	0.507657	0.214721	0.074348	0.044259		109.8	2.85346	2.06586	1.33007	0.702544	0.302265	0.16949	0.073323
	110	2.18598	1.19789	0.481615	0.202648	0.058809	0.101487	0.050902		110	3.09743	2.36673	1.25099	0.508981	0.215559	0.074846	0.044601		110	2.85466	2.0674	1.33099	0.70319	0.302865	0.170187	0.073861
	110.2	2.18699	1.20002	0.482213	0.202784	0.059239	0.101612	0.050501		110.2	3.09879	2.36868	1.25204	0.509643	0.216405	0.074452	0.044962		110.2	2.85593	2.06887	1.33184	0.703557	0.303304	0.170663	0.073664
	110.4	2.18871	1.20193	0.482764	0.202618	0.060043	0.101916	0.051064		110.4	3.09972	2.37034	1.25349	0.50991	0.216223	0.074107	0.044491		110.4	2.85665	2.06953	1.33251	0.703565	0.303162	0.171298	0.07383
	110.6	2.18947	1.20277	0.483072	0.202244	0.060148	0.102079	0.050853		110.6	3.10108	2.37242	1.25597	0.511027	0.216603	0.074355	0.044861		110.6	2.85757	2.06985	1.33321	0.703772	0.303602	0.171757	0.073698
	110.8	2.19064	1.20352	0.483825	0.202076	0.060172	0.101949	0.050241		110.8	3.10202	2.37413	1.25778	0.511809	0.216608	0.074066	0.045038		110.8	2.85862	2.07086	1.33396	0.70439	0.303922	0.172222	0.073974
	111	2.19256	1.20518	0.484447	0.202521	0.060513	0.10197	0.050679		111	3.10391	2.37616	1.25985	0.512059	0.216419	0.074282	0.044998		111	2.85891	2.07174	1.33446	0.704489	0.303805	0.171916	0.073529
	111.2	2.19425	1.2069	0.48519	0.203396	0.060401	0.102116	0.05037		111.2	3.10538	2.37791	1.26202	0.513111	0.217375	0.075121	0.044965		111.2	2.85981	2.07256	1.33485	0.705052	0.304458	0.172128	0.07386
	111.4	2.19574	1.20837	0.486283	0.204375	0.0606	0.102519	0.050325		111.4	3.10718	2.38029	1.26357	0.514332	0.218503	0.075762	0.045402		111.4	2.86147	2.07402	1.33567	0.706076	0.305241	0.172368	0.074732
	111.6	2.19787	1.21017	0.487356	0.205273	0.060733	0.102754	0.050879		111.6	3.10862	2.38234	1.26564	0.515507	0.218845	0.07671	0.045568		111.6	2.86321	2.07519	1.33673	0.707423	0.305835	0.172834	0.074919
	111.8	2.19963	1.21162	0.48821	0.205834	0.061016	0.102936	0.050779		111.8	3.11022	2.38432	1.26755	0.516371	0.219396	0.0773	0.045708		111.8	2.86455	2.07611	1.33744	0.708266	0.306076	0.172967	0.075075
	112	2.20124	1.21339	0.48879	0.206111	0.060746	0.103009	0.050968		112	3.11151	2.38614	1.26892	0.517587	0.219807	0.077361	0.045865		112	2.86515	2.07715	1.33803	0.708674	0.306543	0.172874	0.074999
	112.2	2.20278	1.21475	0.489993	0.207007	0.060768	0.1029	0.051014		112.2	3.11235	2.38758	1.27033	0.517819	0.219885	0.077339	0.045365		112.2	2.86587	2.07815	1.3393	0.709351	0.306791	0.173226	0.074928
	112.4	2.2047	1.21694	0.491363	0.2078	0.06076	0.10314	0.051347		112.4	3.11344	2.38883	1.27159	0.519186	0.220064	0.077337	0.045969		112.4	2.86722	2.07883	1.34042	0.710165	0.307269	0.17347	0.074752
	112.6	2.2062	1.21849	0.492372	0.208788	0.061381	0.103359	0.051605		112.6	3.11458	2.39074	1.27303	0.520055	0.220125	0.077619	0.046112		112.6	2.86821	2.07957	1.34121	0.710634	0.307322	0.173153	0.074596
	112.8	2.20781	1.22011	0.493328	0.209303	0.061928	0.103717	0.05177		112.8	3.11578	2.39207	1.27442	0.520854	0.22015	0.07772	0.046189		112.8	2.86921	2.07999	1.34194	0.711233	0.307123	0.173042	0.074243
	113	2.20898	1.22129	0.493428	0.209378	0.061609	0.103227	0.05129		113	3.11712	2.39364	1.27538	0.521546	0.220792	0.077679	0.046467		113	2.86958	2.0804	1.34194	0.710849	0.307081	0.172675	0.073717
	113.2	2.21069	1.22307	0.49445	0.209543	0.0618	0.103663	0.051998		113.2	3.11821	2.39558	1.27708	0.522061	0.22096	0.077745	0.04671		113.2	2.86995	2.08087	1.34168	0.711481	0.307317	0.17248	0.073864
	113.4	2.21214	1.22441	0.495156	0.210074	0.062428	0.104129	0.052415		113.4	3.11976	2.39734	1.27919	0.52345	0.221808	0.07781	0.046907		113.4	2.87024	2.08131	1.34222	0.711753	0.307015	0.172513	0.073069
	113.6	2.21261	1.22522	0.495098	0.210219	0.062085	0.103603	0.051776		113.6	3.12048	2.39861	1.28064	0.523599	0.221329	0.077382	0.046958		113.6	2.87123	2.08236	1.34301	0.71213	0.307122	0.172513	0.072819
	113.8	2.21417	1.22699	0.496334	0.210988	0.063005	0.103681	0.052322		113.8	3.12235	2.40076	1.28279	0.524731	0.222474	0.077981	0.047519		113.8	2.87247	2.0829	1.34377	0.712772	0.307775	0.173014	0.073169
	114	2.21557	1.22859	0.49703	0.211108	0.063523	0.103978	0.052403		114	3.12388	2.4026	1.28483	0.526023	0.223277	0.078393	0.047403		114	2.87362	2.08399	1.34477	0.713086	0.308195	0.173316	0.073161
	114.2	2.21606	1.23038	0.497788	0.211288	0.064086	0.104209	0.05192		114.2	3.12516	2.4039	1.28586	0.526325	0.222923	0.077933	0.046856		114.2	2.87442	2.08472	1.34512	0.713385	0.308103	0.17303	0.073126
	114.4	2.21736	1.23188	0.498641	0.211391	0.064529	0.104366	0.052005		114.4	3.12584	2.40531	1.28766	0.527299	0.222774	0.078092	0.046296		114.4	2.87535	2.08491	1.34573	0.713729	0.308338	0.172846	0.073331
	114.6	2.21815	1.23297	0.499317	0.211362	0.064636	0.103763	0.051713		114.6	3.12665	2.40695	1.28943	0.527836	0.222773	0.077857	0.046339		114.6	2.87684	2.08568	1.34682	0.714389	0.308344	0.172689	0.073043
	114.8	2.2195	1.23421	0.499733	0.211361	0.06428	0.103349	0.051344		114.8	3.12734	2.4085	1.29067	0.52836	0.2225	0.0776	0.045848		114.8	2.87714	2.08596	1.34691	0.714393	0.307796	0.172597	0.073117
	115	2.22088	1.23612	0.500633	0.212024	0.063956	0.103302	0.052081		115	3.12889	2.41038	1.29239	0.529135	0.223221	0.077831	0.045448		115	2.87837	2.08689	1.34789	0.715342	0.307976	0.173055	0.07351
	115.2	2.22213	1.23769	0.501435	0.212496	0.063464	0.10372	0.052097		115.2	3.13016	2.41204	1.29346	0.530478	0.223928	0.078386	0.045104		115.2	2.87993	2.08774	1.34935	0.715849	0.308193	0.173534	0.074066
	115.4	2.22333	1.23915	0.502439	0.212836	0.063092	0.104134	0.05211		115.4	3.13138	2.41457	1.29508	0.531623	0.224217	0.078941	0.045214		115.4	2.88102	2.08823	1.34969	0.716327	0.307897	0.173706	0.073942
	115.6	2.2247	1.24116	0.50326	0.212925	0.062935	0.104196	0.052358		115.6	3.13267	2.41631	1.29696	0.532665	0.224676	0.079682	0.045435		115.6	2.88228	2.08923	1.35049	0.716995	0.308248	0.173826	0.074132
	115.8	2.22631	1.24308	0.504522	0.213331	0.062878	0.104776	0.052903		115.8	3.13354	2.41786	1.29835	0.533335	0.22443	0.079987	0.045113		115.8	2.88313	2.09003	1.3514	0.717514	0.308659	0.173902	0.074309
	116	2.22739	1.24512	0.505689	0.213941	0.062691	0.105147	0.053043		116	3.13455	2.41931	1.30034	0.534249	0.224559	0.080132	0.045196		116	2.88408	2.09113	1.35142	0.717885	0.308865	0.174134	0.074075
	116.2	2.22815	1.24651	0.507041	0.214102	0.062658	0.105065	0.052824		116.2	3.13557	2.4208	1.30181	0.535003	0.225062	0.080559	0.045442		116.2	2.88547	2.09231	1.35239	0.718918	0.309164	0.174618	0.074563
	116.4	2.2295	1.2485	0.508019	0.214302	0.062791	0.105662	0.053169		116.4	3.13662	2.42258	1.30351	0.536285	0.225295	0.080684	0.045735		116.4	2.88686	2.09335	1.35324	0.72008	0.309548	0.1746	0.074721
	116.6	2.23113	1.24993	0.509288	0.214861	0.063345	0.105898	0.053305		116.6	3.13817	2.42505	1.30571	0.537056	0.22611	0.081102	0.045802		116.6	2.88753	2.09406	1.35343	0.720351	0.309659	0.174227	0.074729
	116.8	2.2327	1.2517	0.509916	0.214997	0.063327	0.105827	0.053445		116.8	3.13928	2.42635	1.30747	0.537978	0.226254	0.080926	0.046333		116.8	2.88823	2.09455	1.35364	0.721054	0.309786	0.174298	0.074508
	117	2.23436	1.25408	0.510908	0.215519	0.064138	0.106248	0.053822		117	3.14019	2.42795	1.30931	0.538772	0.226527	0.080565	0.046323		117	2.88813	2.09536	1.35349	0.721306	0.309727	0.173736	0.073737
	117.2	2.23553	1.25548	0.512104	0.215628	0.064528	0.106528	0.054458		117.2	3.14167	2.4296	1.31148	0.539892	0.226891	0.080841	0.046622		117.2	2.88903	2.09626	1.35444	0.722177	0.310502	0.174339	0.074156
	117.4	2.23643	1.25666	0.512949	0.215794	0.064575	0.10616	0.054312		117.4	3.14275	2.43096	1.31239	0.540243	0.227318	0.08047	0.046759		117.4	2.88996	2.09685	1.35531	0.722888	0.31126	0.174321	0.074349
	117.6	2.23796	1.25822	0.513864	0.216252	0.064813	0.106155	0.054346		117.6	3.14364	2.43273	1.31441	0.540772	0.227528	0.080584	0.046728		117.6	2.89118	2.09796	1.35599	0.723426	0.312105	0.174113	0.074483
	117.8	2.23985	1.25972	0.51473	0.216275	0.064935	0.106259	0.054696		117.8	3.14506	2.43451	1.31608	0.541927	0.228636	0.08103	0.046972		117.8	2.89227	2.09849	1.35654	0.723758	0.312436	0.174404	0.074805
	118	2.24133	1.26094	0.51525	0.216593	0.065268	0.106659	0.054257		118	3.14622	2.4358	1.31733	0.542323	0.228528	0.080735	0.046573		118	2.89288	2.09867	1.35671	0.723744	0.311699	0.173689	0.074352
	118.2	2.24238	1.26191	0.515685	0.216743	0.065627	0.106658	0.053649		118.2	3.14751	2.43786	1.3189	0.543485	0.229064	0.08106	0.046664		118.2	2.89367	2.09899	1.35721	0.724013	0.311847	0.173199	0.074178
	118.4	2.24382	1.26294	0.51567	0.216736	0.065732	0.106612	0.053514		118.4	3.14832	2.43959	1.31994	0.54418	0.229443	0.080544	0.046543		118.4	2.8949	2.09983	1.3581	0.724686	0.312543	0.174009	0.07408
	118.6	2.24555	1.26406	0.51584	0.216514	0.065904	0.106598	0.053402		118.6	3.14916	2.44107	1.32127	0.544657	0.23005	0.080199	0.046703		118.6	2.8966	2.10106	1.35854	0.725413	0.313302	0.174549	0.074295
	118.8	2.2465	1.26481	0.515751	0.2161	0.065479	0.1066	0.05311		118.8	3.15091	2.44286	1.32273	0.545975	0.230745	0.080084	0.046571		118.8	2.89722	2.10145	1.35908	0.725356	0.313517	0.174622	0.074663
	119	2.2475	1.26641	0.516748	0.216695	0.065511	0.106925	0.053264		119	3.1523	2.44469	1.32421	0.547149	0.231732	0.08036	0.046971		119	2.89836	2.10206	1.35981	0.725671	0.313343	0.17504	0.074708
	119.2	2.24853	1.268	0.517069	0.216916	0.065454	0.107312	0.053158		119.2	3.15342	2.44603	1.32589	0.548264	0.232132	0.080392	0.047217		119.2	2.89935	2.1024	1.36072	0.7255	0.313121	0.175163	0.074587
	119.4	2.24929	1.26907	0.517234	0.21666	0.064717	0.106993	0.05304		119.4	3.15452	2.44787	1.32815	0.549705	0.23276	0.080881	0.047771		119.4	2.90007	2.10291	1.36104	0.725721	0.313012	0.175187	0.074485
	119.6	2.25073	1.27107	0.517985	0.216821	0.064466	0.107217	0.053105		119.6	3.15541	2.4492	1.32991	0.550257	0.232895	0.081058	0.048195		119.6	2.90142	2.10463	1.36168	0.72659	0.313555	0.176001	0.075496
	119.8	2.25223	1.27281	0.519311	0.217059	0.064282	0.107784	0.053742		119.8	3.15662	2.45083	1.33189	0.551318	0.233527	0.081641	0.048372		119.8	2.90288	2.10584	1.36261	0.727883	0.313847	0.176935	0.076032
	120	2.25331	1.27421	0.519736	0.217162	0.064363	0.107635	0.053731		120	3.15765	2.45221	1.33381	0.551879	0.233673	0.081732	0.048484		120	2.90384	2.1068	1.36273	0.728234	0.313471	0.177433	0.075889
	120.2	2.25439	1.27535	0.520471	0.217337	0.064407	0.107555	0.053827		120.2	3.15892	2.4546	1.33598	0.552972	0.234578	0.082339	0.049209		120.2	2.9048	2.10833	1.36391	0.729098	0.314327	0.178082	0.076582
	120.4	2.2554	1.2765	0.520991	0.217656	0.064322	0.107569	0.053525		120.4	3.16041	2.45669	1.33764	0.553674	0.234972	0.082488	0.048883		120.4	2.90572	2.10941	1.36491	0.729662	0.31443	0.178145	0.076696
	120.6	2.2573	1.27811	0.522372	0.218606	0.06469	0.107561	0.053903		120.6	3.16253	2.45877	1.34004	0.554996	0.235686	0.082946	0.049751		120.6	2.90659	2.11009	1.36543	0.73053	0.314948	0.178531	0.076921
	120.8	2.25898	1.27985	0.523409	0.219275	0.065201	0.107541	0.054668		120.8	3.16346	2.45986	1.34207	0.555755	0.235141	0.082684	0.049924		120.8	2.90686	2.11083	1.36633	0.731144	0.315015	0.178445	0.076993
	121	2.26072	1.28147	0.524769	0.219606	0.065828	0.107651	0.05503		121	3.16472	2.46175	1.34388	0.556815	0.235901	0.08288	0.049832		121	2.90706	2.11155	1.36711	0.731132	0.314854	0.178219	0.076698
	121.2	2.26259	1.28298	0.526215	0.220611	0.065905	0.107771	0.055512		121.2	3.16618	2.46319	1.34513	0.557307	0.236147	0.083403	0.050069		121.2	2.90823	2.11292	1.36841	0.731763	0.316069	0.179076	0.077615
	121.4	2.2645	1.28446	0.527668	0.221288	0.066114	0.107754	0.055703		121.4	3.16675	2.46457	1.34628	0.55743	0.236187	0.083099	0.049904		121.4	2.9096	2.11415	1.36967	0.732468	0.316969	0.179084	0.078594
	121.6	2.26633	1.28546	0.528475	0.221844	0.066246	0.108284	0.055506		121.6	3.16811	2.4665	1.34838	0.558378	0.236886	0.083901	0.050229		121.6	2.91039	2.11505	1.37011	0.733035	0.317205	0.179286	0.078614
	121.8	2.2679	1.28705	0.529516	0.222496	0.066739	0.108792	0.055667		121.8	3.1689	2.46774	1.34955	0.558565	0.236903	0.083489	0.049431		121.8	2.91104	2.11512	1.37007	0.732761	0.317214	0.178852	0.078163
	122	2.26923	1.28784	0.530665	0.223167	0.067031	0.109031	0.055416		122	3.16974	2.46937	1.35055	0.558892	0.236936	0.083613	0.048769		122	2.91242	2.11588	1.37079	0.733546	0.317717	0.178953	0.0784
	122.2	2.27028	1.28917	0.531189	0.223546	0.067017	0.109213	0.055041		122.2	3.17037	2.47083	1.35187	0.559463	0.237435	0.08383	0.048798		122.2	2.91337	2.11633	1.3716	0.734018	0.318598	0.179007	0.078431
	122.4	2.27124	1.2907	0.532303	0.223924	0.067173	0.109216	0.054892		122.4	3.17101	2.47189	1.35326	0.559998	0.23757	0.083529	0.048652		122.4	2.91501	2.11732	1.37259	0.734931	0.319729	0.179594	0.079163
	122.6	2.27206	1.29205	0.533221	0.224226	0.067126	0.109476	0.054669		122.6	3.17203	2.47289	1.35505	0.561483	0.238347	0.083867	0.048707		122.6	2.91603	2.11781	1.37244	0.73531	0.320056	0.179351	0.07959
	122.8	2.273	1.29358	0.534349	0.224976	0.067299	0.109457	0.054656		122.8	3.17334	2.47443	1.35626	0.56232	0.238457	0.083755	0.048907		122.8	2.91633	2.11784	1.3731	0.735425	0.319733	0.178801	0.079453
	123	2.27409	1.29573	0.535627	0.225861	0.067659	0.10953	0.054864		123	3.17394	2.47579	1.35783	0.563065	0.238582	0.084221	0.048857		123	2.91704	2.11801	1.37341	0.735196	0.318959	0.178514	0.079335
	123.2	2.27551	1.29781	0.536606	0.226876	0.068267	0.11016	0.055704		123.2	3.17501	2.47727	1.35937	0.56445	0.238954	0.084634	0.049448		123.2	2.91781	2.11828	1.37343	0.735394	0.319023	0.178113	0.078965
	123.4	2.27665	1.29922	0.537017	0.22661	0.068183	0.109754	0.055758		123.4	3.17584	2.47883	1.36097	0.565632	0.239226	0.085048	0.049578		123.4	2.91887	2.11908	1.37363	0.735909	0.319527	0.178362	0.078927
	123.6	2.27844	1.30158	0.537721	0.226777	0.068653	0.110298	0.055903		123.6	3.17673	2.48011	1.36277	0.566259	0.239422	0.084585	0.049246		123.6	2.92047	2.12015	1.37394	0.736822	0.319949	0.179099	0.079294
	123.8	2.27964	1.30357	0.538743	0.22707	0.06916	0.110439	0.056595		123.8	3.17843	2.48185	1.3644	0.567261	0.240144	0.085163	0.049476		123.8	2.92126	2.12095	1.37424	0.737127	0.319763	0.17925	0.078845
	124	2.28139	1.30518	0.539143	0.227763	0.069817	0.110788	0.05713		124	3.17941	2.48366	1.36601	0.567845	0.240034	0.084982	0.049193		124	2.92193	2.12209	1.37476	0.737144	0.320014	0.179274	0.078215
	124.2	2.2818	1.3067	0.539393	0.227787	0.069593	0.110376	0.056692		124.2	3.18116	2.48559	1.36756	0.568844	0.240894	0.085739	0.049605		124.2	2.92287	2.12337	1.37589	0.738021	0.320949	0.179891	0.078613
	124.4	2.28287	1.30823	0.539785	0.228229	0.06956	0.11016	0.056653		124.4	3.18276	2.48728	1.36891	0.569952	0.241377	0.086069	0.049655		124.4	2.92371	2.12384	1.37641	0.738067	0.32082	0.179934	0.078275
	124.6	2.28454	1.30978	0.540232	0.228365	0.069874	0.11023	0.056901		124.6	3.18446	2.48922	1.37135	0.571343	0.241907	0.086452	0.050128		124.6	2.92413	2.12477	1.37682	0.738938	0.321246	0.17992	0.077972
	124.8	2.28579	1.31143	0.540451	0.228239	0.070231	0.110239	0.057219		124.8	3.18556	2.49066	1.37278	0.572137	0.242271	0.085949	0.049959		124.8	2.92422	2.12542	1.37748	0.738801	0.320652	0.179576	0.077691
	125	2.28687	1.31285	0.541197	0.228832	0.07013	0.110085	0.057004		125	3.18674	2.49233	1.37419	0.573041	0.242901	0.086218	0.050093		125	2.92565	2.12727	1.37892	0.739881	0.321861	0.180726	0.077925
	125.2	2.28778	1.31391	0.54126	0.229018	0.069674	0.109715	0.056836		125.2	3.18822	2.49368	1.37573	0.573845	0.2433	0.086137	0.050009		125.2	2.92725	2.12885	1.38023	0.740818	0.322931	0.181645	0.078199
	125.4	2.28902	1.31504	0.541625	0.228815	0.069375	0.109556	0.056146		125.4	3.18919	2.49529	1.37719	0.574627	0.243541	0.085821	0.049772		125.4	2.92859	2.12976	1.38117	0.74181	0.32349	0.181989	0.0782
	125.6	2.28989	1.31579	0.541954	0.229052	0.068854	0.109663	0.055933		125.6	3.18994	2.49678	1.37869	0.575131	0.243715	0.08609	0.049396		125.6	2.92929	2.13049	1.38128	0.742469	0.323789	0.182274	0.077747
	125.8	2.29065	1.31689	0.54224	0.229199	0.068513	0.109713	0.055882		125.8	3.1906	2.49791	1.37986	0.575518	0.244004	0.086216	0.048987		125.8	2.93057	2.13146	1.3819	0.742823	0.323764	0.181956	0.07733
	126	2.29159	1.31781	0.542665	0.229217	0.067751	0.109171	0.055095		126	3.19157	2.49951	1.38132	0.57612	0.244368	0.086639	0.049076		126	2.93197	2.13238	1.38323	0.744192	0.324489	0.181965	0.077881
	126.2	2.29253	1.31939	0.543882	0.229874	0.067878	0.109055	0.054847		126.2	3.19254	2.50088	1.38331	0.576947	0.244703	0.086726	0.048871		126.2	2.93277	2.13291	1.38378	0.744486	0.324555	0.181652	0.078193
	126.4	2.29316	1.32072	0.544682	0.229947	0.067787	0.108863	0.054535		126.4	3.19328	2.50244	1.38499	0.577776	0.245264	0.08702	0.048812		126.4	2.93391	2.13343	1.38437	0.744852	0.324367	0.18133	0.078076
	126.6	2.29466	1.3219	0.545306	0.230512	0.067777	0.109292	0.054307		126.6	3.19424	2.50388	1.38627	0.578707	0.245591	0.087136	0.049008		126.6	2.93494	2.13393	1.38453	0.744987	0.324319	0.181033	0.078357
	126.8	2.29631	1.32341	0.546716	0.230746	0.067963	0.109138	0.054481		126.8	3.1955	2.50597	1.38752	0.579756	0.245942	0.087748	0.049676		126.8	2.93555	2.134	1.38464	0.744788	0.324215	0.180533	0.077955
	127	2.29823	1.32538	0.548146	0.231381	0.06877	0.109287	0.054982		127	3.19656	2.50794	1.38898	0.580646	0.246399	0.088277	0.049805		127	2.93701	2.13429	1.38484	0.744939	0.324403	0.180453	0.077713
	127.2	2.29987	1.32681	0.549391	0.231745	0.069296	0.110113	0.055092		127.2	3.19756	2.50951	1.39042	0.581612	0.246449	0.087817	0.049813		127.2	2.93786	2.13488	1.38535	0.745044	0.3247	0.180359	0.077668
	127.4	2.30093	1.32778	0.549472	0.231156	0.068821	0.109317	0.05446		127.4	3.19868	2.51061	1.39183	0.581934	0.246803	0.087244	0.049413		127.4	2.9396	2.1356	1.38631	0.745876	0.325255	0.181114	0.078283
	127.6	2.30272	1.3296	0.55066	0.2314	0.068853	0.109376	0.054621		127.6	3.19999	2.51188	1.39324	0.582482	0.247226	0.087215	0.049362		127.6	2.94046	2.1364	1.38706	0.745921	0.324778	0.180906	0.078315
	127.8	2.30393	1.33126	0.55193	0.231757	0.069278	0.109146	0.055303		127.8	3.20078	2.51311	1.39458	0.582582	0.246661	0.087516	0.049377		127.8	2.94096	2.13731	1.38754	0.745724	0.324305	0.180572	0.078135
	128	2.30527	1.33273	0.552456	0.231622	0.069082	0.10907	0.055752		128	3.20184	2.51414	1.39584	0.582971	0.247047	0.087544	0.049808		128	2.94218	2.13846	1.38852	0.746397	0.324828	0.181112	0.078678
	128.2	2.30594	1.33455	0.552643	0.231352	0.068557	0.109021	0.055485		128.2	3.2025	2.51493	1.39682	0.583361	0.246952	0.087666	0.050374		128.2	2.9429	2.13884	1.38924	0.746759	0.32499	0.181285	0.078915
	128.4	2.30711	1.33587	0.553287	0.231303	0.068619	0.109208	0.055587		128.4	3.20306	2.51568	1.39812	0.583609	0.247081	0.087269	0.050079		128.4	2.94365	2.13873	1.38966	0.746849	0.324756	0.181458	0.078723
	128.6	2.30831	1.33686	0.553525	0.231004	0.068503	0.109215	0.055389		128.6	3.20414	2.51662	1.39955	0.58415	0.247379	0.086895	0.050062		128.6	2.94398	2.13949	1.39064	0.74773	0.325064	0.181736	0.078985
	128.8	2.30916	1.33833	0.554277	0.231047	0.068521	0.109381	0.055945		128.8	3.20466	2.51733	1.40047	0.584298	0.246853	0.085902	0.049912		128.8	2.94486	2.13998	1.39166	0.748631	0.32516	0.182541	0.078816
	129	2.30993	1.33954	0.55497	0.231635	0.068578	0.109299	0.056225		129	3.20516	2.51873	1.4023	0.584804	0.246949	0.086116	0.04976		129	2.94628	2.14114	1.39284	0.749859	0.32663	0.183836	0.078936
	129.2	2.3114	1.3411	0.55515	0.232015	0.068868	0.109505	0.056427		129.2	3.20578	2.51944	1.40358	0.585782	0.247254	0.086078	0.049489		129.2	2.94688	2.14162	1.39355	0.750385	0.326892	0.184059	0.078326
	129.4	2.3131	1.34305	0.555651	0.232669	0.069334	0.110242	0.056831		129.4	3.20615	2.52059	1.40488	0.586574	0.246833	0.086093	0.0494		129.4	2.94771	2.14231	1.39462	0.751493	0.32728	0.184291	0.078375
	129.6	2.31421	1.3443	0.555991	0.233311	0.069377	0.110339	0.057155		129.6	3.20715	2.52212	1.40695	0.587619	0.247372	0.086859	0.049468		129.6	2.94795	2.14327	1.39527	0.752057	0.327543	0.184297	0.078255
	129.8	2.3157	1.34638	0.557249	0.234138	0.070237	0.110963	0.057251		129.8	3.20751	2.52316	1.40855	0.58837	0.24767	0.086989	0.049714		129.8	2.9492	2.14405	1.39587	0.753093	0.327858	0.184568	0.078179
	130	2.31715	1.34821	0.558627	0.235006	0.071056	0.11125	0.057337		130	3.20869	2.52527	1.41091	0.589869	0.248018	0.087127	0.049414		130	2.94983	2.14471	1.39642	0.753781	0.328254	0.184441	0.078151
	130.2	2.31841	1.34994	0.559895	0.236094	0.071761	0.111895	0.057843		130.2	3.20984	2.52741	1.41322	0.59166	0.249064	0.087829	0.049521		130.2	2.95033	2.14549	1.39668	0.753831	0.328343	0.184479	0.078395
	130.4	2.32018	1.35179	0.560986	0.236997	0.072541	0.113065	0.058239		130.4	3.21065	2.52953	1.4149	0.593236	0.249735	0.088272	0.050387		130.4	2.95088	2.14621	1.39687	0.754073	0.328539	0.184325	0.078079
	130.6	2.32196	1.35357	0.56247	0.237837	0.072917	0.113639	0.058334		130.6	3.21226	2.532	1.41714	0.595241	0.250418	0.088776	0.05072		130.6	2.9517	2.14691	1.39745	0.754329	0.329062	0.184306	0.078305
	130.8	2.32311	1.35528	0.563833	0.238591	0.073174	0.114131	0.058368		130.8	3.2139	2.53434	1.41893	0.597158	0.251527	0.089363	0.051133		130.8	2.95242	2.14756	1.3978	0.754664	0.329113	0.184049	0.078117
	131	2.32503	1.35714	0.565548	0.239728	0.073957	0.114621	0.058488		131	3.21527	2.53593	1.42091	0.598185	0.251613	0.089234	0.051206		131	2.95322	2.14844	1.39831	0.75512	0.329392	0.184586	0.078289
	131.2	2.32553	1.35822	0.566144	0.239971	0.073905	0.114734	0.057695		131.2	3.2164	2.53732	1.42235	0.599118	0.251983	0.089338	0.050995		131.2	2.95335	2.14918	1.39908	0.754658	0.328819	0.184916	0.078797
	131.4	2.32642	1.35915	0.566649	0.239963	0.073526	0.113993	0.057209		131.4	3.21747	2.53894	1.42347	0.599687	0.252177	0.089325	0.051084		131.4	2.95396	2.14978	1.39891	0.754496	0.328402	0.185119	0.078941
	131.6	2.32769	1.36082	0.568179	0.240478	0.073656	0.113958	0.057642		131.6	3.21805	2.54025	1.42518	0.600842	0.252252	0.089621	0.05128		131.6	2.95425	2.15075	1.39884	0.753963	0.327806	0.184402	0.078589
	131.8	2.32798	1.36159	0.568448	0.239934	0.073403	0.113432	0.057306		131.8	3.21952	2.54195	1.4265	0.601707	0.252872	0.089864	0.052114		131.8	2.9556	2.15153	1.39949	0.75449	0.32801	0.1847	0.078962
	132	2.32894	1.36252	0.569352	0.23984	0.073225	0.113576	0.057303		132	3.2211	2.5435	1.42783	0.602607	0.253786	0.090321	0.053231		132	2.9569	2.15196	1.39959	0.754802	0.328029	0.184778	0.078933
	132.2	2.32963	1.36372	0.569798	0.2396	0.07287	0.113855	0.056984		132.2	3.22184	2.54471	1.42876	0.603321	0.254323	0.090515	0.05303		132.2	2.95758	2.15236	1.39994	0.755105	0.328039	0.1846	0.078546
	132.4	2.33033	1.36467	0.570206	0.239464	0.072595	0.113352	0.056655		132.4	3.22295	2.54599	1.43004	0.603975	0.255314	0.090813	0.05284		132.4	2.95824	2.15263	1.40018	0.755012	0.327206	0.184376	0.07796
	132.6	2.3309	1.36506	0.570485	0.239247	0.072361	0.112732	0.056571		132.6	3.22412	2.54731	1.43168	0.604599	0.255597	0.090997	0.052806		132.6	2.95919	2.1536	1.40085	0.755486	0.327794	0.18421	0.077743
	132.8	2.33137	1.3662	0.570898	0.239029	0.072057	0.112459	0.056867		132.8	3.22487	2.54859	1.43329	0.605084	0.255704	0.091532	0.052586		132.8	2.96019	2.15435	1.40147	0.755993	0.32778	0.18472	0.077288
	133	2.33281	1.36732	0.571465	0.239554	0.071947	0.11274	0.057011		133	3.22603	2.55002	1.43451	0.605714	0.256225	0.092052	0.052309		133	2.96078	2.15458	1.40179	0.756291	0.327714	0.184212	0.07689
	133.2	2.334	1.36826	0.57173	0.2397	0.071853	0.112343	0.057423		133.2	3.22695	2.55034	1.43565	0.606535	0.256101	0.092195	0.052011		133.2	2.9621	2.15588	1.40278	0.756794	0.328404	0.184034	0.07697
	133.4	2.33507	1.36939	0.571949	0.239681	0.071775	0.112017	0.05734		133.4	3.22806	2.55169	1.43678	0.607322	0.256233	0.092428	0.052125		133.4	2.96356	2.15687	1.4039	0.757668	0.328626	0.184005	0.077431
	133.6	2.33581	1.37029	0.572271	0.239572	0.071442	0.111504	0.056954		133.6	3.22885	2.55315	1.4379	0.6079	0.256624	0.092891	0.051825		133.6	2.96496	2.15782	1.40471	0.758624	0.329412	0.184397	0.077376
	133.8	2.33656	1.37145	0.573591	0.23968	0.071644	0.111713	0.057028		133.8	3.22928	2.55424	1.43923	0.60866	0.25699	0.092883	0.051539		133.8	2.96697	2.15904	1.40591	0.759859	0.330409	0.18527	0.077781
	134	2.33799	1.37243	0.574792	0.240121	0.071878	0.112207	0.057184		134	3.23116	2.55644	1.4411	0.610431	0.25813	0.093816	0.051782		134	2.96773	2.15993	1.40668	0.760564	0.330499	0.184631	0.077522
	134.2	2.34013	1.37452	0.57623	0.241358	0.072633	0.113308	0.057804		134.2	3.23212	2.55791	1.44259	0.610949	0.258595	0.094043	0.05181		134.2	2.96856	2.16079	1.40749	0.761171	0.331039	0.184681	0.077799
	134.4	2.34185	1.37637	0.57754	0.242249	0.073228	0.114226	0.058268		134.4	3.23259	2.5591	1.44405	0.611522	0.258282	0.093722	0.051825		134.4	2.97025	2.16218	1.40814	0.761904	0.331806	0.185055	0.078324
	134.6	2.34359	1.37827	0.578631	0.243104	0.073489	0.11426	0.058383		134.6	3.23342	2.56025	1.44517	0.612125	0.2585	0.093708	0.051623		134.6	2.97144	2.16309	1.40906	0.762601	0.3324	0.185461	0.078817
	134.8	2.34504	1.37972	0.579708	0.244013	0.074121	0.11515	0.058678		134.8	3.23453	2.56116	1.44672	0.612663	0.258673	0.093425	0.051866		134.8	2.97288	2.16396	1.4101	0.763877	0.333143	0.186166	0.079186
	135	2.34661	1.38145	0.58059	0.244456	0.074599	0.115047	0.058579		135	3.23532	2.56225	1.44827	0.612636	0.258432	0.093078	0.051671		135	2.97326	2.16483	1.41024	0.764306	0.33358	0.187062	0.079532
	135.2	2.34816	1.38292	0.5812	0.245201	0.074873	0.115408	0.058574		135.2	3.23572	2.56359	1.44939	0.61268	0.258376	0.092817	0.051423		135.2	2.97414	2.16577	1.41074	0.764478	0.333879	0.187425	0.079997
	135.4	2.3497	1.38413	0.581983	0.245134	0.075199	0.115471	0.05862		135.4	3.23667	2.56521	1.45077	0.61328	0.258505	0.092022	0.05176		135.4	2.97502	2.1664	1.41103	0.764824	0.334317	0.187512	0.079901
	135.6	2.35105	1.38565	0.582672	0.24568	0.075826	0.115816	0.058612		135.6	3.23797	2.56651	1.45254	0.614253	0.259497	0.091791	0.052664		135.6	2.97623	2.1673	1.41132	0.765513	0.334699	0.187894	0.080308
	135.8	2.35221	1.38692	0.583362	0.245869	0.076194	0.116207	0.058352		135.8	3.23922	2.56753	1.4535	0.614933	0.259882	0.091614	0.052986		135.8	2.97702	2.16802	1.41194	0.765797	0.335511	0.187846	0.080269
	136	2.35342	1.38833	0.584067	0.246074	0.076272	0.11625	0.058368		136	3.2399	2.56904	1.45522	0.615721	0.26039	0.091614	0.053084		136	2.97767	2.16864	1.41212	0.766062	0.335268	0.187566	0.079879
	136.2	2.35449	1.38986	0.584759	0.246285	0.076197	0.11655	0.05851		136.2	3.24055	2.57013	1.45676	0.616539	0.260587	0.09139	0.052655		136.2	2.97792	2.16948	1.41219	0.7661	0.335272	0.18736	0.080295
	136.4	2.35554	1.39098	0.58525	0.246094	0.075825	0.115828	0.058476		136.4	3.24155	2.57217	1.4589	0.618056	0.261352	0.091976	0.053134		136.4	2.97867	2.17013	1.41278	0.765744	0.334924	0.187311	0.080335
	136.6	2.35636	1.39207	0.585855	0.246317	0.075967	0.115592	0.058764		136.6	3.24261	2.57331	1.46045	0.618761	0.261409	0.092152	0.052605		136.6	2.97918	2.17061	1.41285	0.765805	0.335068	0.187425	0.080369
	136.8	2.35771	1.39404	0.586726	0.246992	0.075439	0.115974	0.059262		136.8	3.24376	2.57514	1.46221	0.619736	0.261866	0.092194	0.052674		136.8	2.98033	2.17153	1.41342	0.766298	0.334967	0.187894	0.080998
	137	2.35892	1.39495	0.587524	0.246976	0.07493	0.115872	0.059572		137	3.24472	2.57682	1.46358	0.620339	0.26189	0.091647	0.052494		137	2.98143	2.17193	1.41422	0.76731	0.335376	0.187295	0.081109
	137.2	2.35948	1.39619	0.588447	0.247093	0.075239	0.115553	0.059619		137.2	3.24521	2.57795	1.46507	0.621557	0.262128	0.091868	0.052095		137.2	2.98275	2.17297	1.41476	0.767545	0.335619	0.186874	0.081472
	137.4	2.36005	1.39709	0.588801	0.247074	0.074783	0.115618	0.059161		137.4	3.24564	2.57964	1.4659	0.622355	0.261662	0.09199	0.051548		137.4	2.9834	2.17307	1.41493	0.767644	0.33504	0.186397	0.081036
	137.6	2.36053	1.39794	0.589039	0.246412	0.074327	0.11562	0.058528		137.6	3.2466	2.58109	1.46769	0.62363	0.262205	0.093076	0.051606		137.6	2.98403	2.17318	1.41563	0.768293	0.335293	0.1869	0.080638
	137.8	2.36136	1.3992	0.589995	0.246464	0.074356	0.115623	0.058549		137.8	3.24829	2.5831	1.46923	0.6252	0.263263	0.093867	0.051946		137.8	2.9844	2.17331	1.41623	0.76874	0.335286	0.186854	0.08035
	138	2.36251	1.40057	0.590653	0.246884	0.074634	0.115866	0.058864		138	3.24932	2.58461	1.47064	0.625847	0.263243	0.094103	0.051829		138	2.98461	2.17347	1.41611	0.768752	0.334582	0.186674	0.079789
	138.2	2.36318	1.40221	0.591056	0.247322	0.074908	0.116061	0.058751		138.2	3.25026	2.58578	1.47182	0.626288	0.263116	0.09424	0.051513		138.2	2.985	2.17398	1.41639	0.768998	0.334756	0.187027	0.079734
	138.4	2.36391	1.40369	0.591618	0.2479	0.075299	0.115947	0.059078		138.4	3.25133	2.58727	1.47304	0.627041	0.263684	0.09457	0.052152		138.4	2.98597	2.17474	1.4168	0.769215	0.334906	0.187149	0.079824
	138.6	2.36434	1.4045	0.592227	0.247785	0.075038	0.115425	0.059026		138.6	3.25232	2.58855	1.47436	0.627723	0.264263	0.094869	0.052443		138.6	2.98652	2.17489	1.41717	0.769614	0.334967	0.187131	0.079373
	138.8	2.36505	1.40597	0.592606	0.247952	0.074959	0.115524	0.059023		138.8	3.2537	2.58983	1.4759	0.628315	0.264905	0.094878	0.052751		138.8	2.98733	2.17544	1.41758	0.770264	0.335045	0.187188	0.079105
	139	2.36635	1.40732	0.593152	0.248279	0.075268	0.115433	0.058611		139	3.25416	2.59141	1.47679	0.628451	0.265336	0.094698	0.052425		139	2.98799	2.17595	1.41786	0.770581	0.335047	0.187315	0.079273
	139.2	2.36779	1.40847	0.593804	0.249092	0.07557	0.115701	0.058993		139.2	3.25543	2.59278	1.47891	0.629432	0.265627	0.094715	0.0533		139.2	2.98851	2.17661	1.4182	0.77034	0.335034	0.18759	0.079209
	139.4	2.36823	1.4098	0.594504	0.248754	0.076092	0.115359	0.058442		139.4	3.25685	2.59397	1.47998	0.630178	0.26638	0.094703	0.053631		139.4	2.98901	2.177	1.41887	0.770659	0.335165	0.187623	0.079206
	139.6	2.36915	1.41114	0.595156	0.249505	0.07671	0.115517	0.058346		139.6	3.2574	2.59479	1.48115	0.630713	0.266469	0.094625	0.053763		139.6	2.99029	2.17813	1.41989	0.771254	0.335824	0.187791	0.079673
	139.8	2.37032	1.41239	0.596016	0.249781	0.076559	0.115376	0.058497		139.8	3.25812	2.59586	1.48274	0.631812	0.266783	0.095285	0.053593		139.8	2.99152	2.17926	1.42117	0.771728	0.336806	0.187927	0.080144
	140	2.37148	1.41359	0.596944	0.249936	0.076462	0.115235	0.058216		140	3.25918	2.59783	1.48435	0.632614	0.267996	0.095862	0.054396		140	2.99285	2.18019	1.42244	0.772452	0.3369	0.188208	0.080945
	140.2	2.37317	1.41517	0.598807	0.251036	0.077336	0.115963	0.05889		140.2	3.25972	2.59898	1.48603	0.633354	0.267962	0.096004	0.054391		140.2	2.99379	2.18122	1.42274	0.772453	0.337092	0.188389	0.08128
	140.4	2.37502	1.41686	0.599965	0.251973	0.077638	0.116076	0.059221		140.4	3.26105	2.60034	1.48775	0.634796	0.269076	0.096729	0.054884		140.4	2.99514	2.1823	1.42393	0.772963	0.338037	0.188964	0.081717
	140.6	2.37656	1.41849	0.601441	0.25289	0.07808	0.116447	0.059447		140.6	3.26193	2.60133	1.48902	0.63508	0.269452	0.096401	0.054921		140.6	2.99622	2.18315	1.42445	0.774058	0.338572	0.188924	0.082013
	140.8	2.37826	1.42018	0.602624	0.253463	0.078223	0.117009	0.060101		140.8	3.26254	2.60268	1.49126	0.635825	0.270058	0.096346	0.055134		140.8	2.99758	2.18436	1.42555	0.774817	0.339633	0.189236	0.082413
	141	2.37949	1.42087	0.603749	0.253443	0.078123	0.116851	0.060104		141	3.26348	2.60364	1.49302	0.636745	0.270384	0.096794	0.054956		141	2.9985	2.18527	1.4262	0.775268	0.339986	0.188785	0.082358
	141.2	2.38117	1.42248	0.605147	0.254398	0.078614	0.117199	0.060253		141.2	3.26454	2.60455	1.49401	0.637721	0.270443	0.097122	0.054765		141.2	2.99913	2.18593	1.42617	0.775112	0.33924	0.188383	0.081854
	141.4	2.38211	1.42341	0.605289	0.254229	0.078254	0.117029	0.060334		141.4	3.26551	2.60566	1.49604	0.638646	0.270328	0.097458	0.054678		141.4	2.99961	2.18668	1.42628	0.77507	0.339344	0.188609	0.081935
	141.6	2.38334	1.4246	0.605365	0.253969	0.077888	0.116627	0.059802		141.6	3.26668	2.60658	1.4978	0.639512	0.271404	0.097717	0.054664		141.6	3.00025	2.18752	1.42705	0.775794	0.339696	0.188974	0.082357
	141.8	2.38382	1.42577	0.605509	0.254033	0.077676	0.116093	0.06002		141.8	3.26764	2.60781	1.49894	0.639721	0.271443	0.097595	0.054156		141.8	3.00086	2.18818	1.42723	0.775991	0.339437	0.189185	0.082369
	142	2.38477	1.42736	0.605842	0.254621	0.077832	0.11651	0.060368		142	3.26839	2.60893	1.50045	0.640165	0.271827	0.09766	0.054136		142	3.00126	2.18908	1.42765	0.775953	0.339132	0.189249	0.082126
	142.2	2.3852	1.42868	0.606045	0.254776	0.077841	0.116461	0.059823		142.2	3.26946	2.60982	1.50169	0.640972	0.27208	0.097742	0.054192		142.2	3.0014	2.1894	1.42728	0.775857	0.338537	0.188825	0.081376
	142.4	2.38608	1.42994	0.606739	0.254766	0.077466	0.11637	0.060053		142.4	3.27007	2.61125	1.50323	0.641668	0.2724	0.09775	0.054321		142.4	3.00236	2.19024	1.42732	0.776098	0.338682	0.188805	0.0812
	142.6	2.38626	1.4308	0.607099	0.254674	0.077056	0.116392	0.059941		142.6	3.27092	2.61268	1.50483	0.643015	0.272721	0.097964	0.054188		142.6	3.00318	2.19034	1.42738	0.776253	0.338516	0.188712	0.080663
	142.8	2.38733	1.43282	0.607988	0.255275	0.077157	0.116546	0.060274		142.8	3.27146	2.6138	1.50607	0.643827	0.272614	0.097754	0.054186		142.8	3.00362	2.19097	1.42792	0.776759	0.338602	0.188883	0.080532
	143	2.38842	1.4339	0.608685	0.25562	0.07766	0.116958	0.060208		143	3.27255	2.61564	1.50762	0.644791	0.272936	0.097522	0.053849		143	3.00413	2.19112	1.42868	0.777105	0.338591	0.189228	0.080284
	143.2	2.38847	1.43468	0.608312	0.255458	0.07739	0.116331	0.060252		143.2	3.27398	2.61706	1.50979	0.646256	0.27298	0.097625	0.053891		143.2	3.00467	2.19154	1.42923	0.777562	0.338883	0.189451	0.080176
	143.4	2.38912	1.43668	0.609342	0.255906	0.078001	0.116796	0.060062		143.4	3.27457	2.61816	1.51067	0.646912	0.273043	0.097673	0.052723		143.4	3.0059	2.19242	1.43009	0.778187	0.33981	0.189871	0.080478
	143.6	2.38965	1.43771	0.60976	0.256602	0.078062	0.116676	0.060035		143.6	3.27507	2.61911	1.51162	0.647924	0.273037	0.097646	0.052582		143.6	3.00766	2.19341	1.43151	0.779036	0.340763	0.190187	0.080863
	143.8	2.39067	1.43921	0.610858	0.256936	0.078081	0.116969	0.059839		143.8	3.27646	2.62119	1.51359	0.649648	0.274075	0.098325	0.053188		143.8	3.00897	2.19431	1.43253	0.780346	0.34167	0.190842	0.081759
	144	2.39174	1.44052	0.612196	0.257769	0.078534	0.117674	0.060013		144	3.27702	2.62243	1.51487	0.65032	0.273945	0.098015	0.053197		144	3.00951	2.19496	1.43348	0.781117	0.342484	0.190691	0.081781
	144.2	2.3936	1.44224	0.613691	0.258726	0.079675	0.118487	0.060477		144.2	3.27766	2.62374	1.5161	0.651383	0.274062	0.097715	0.053434		144.2	3.01054	2.1953	1.43387	0.781949	0.342835	0.191572	0.081333
	144.4	2.3948	1.44336	0.614847	0.259271	0.08007	0.118749	0.060318		144.4	3.27862	2.62493	1.51725	0.652476	0.27399	0.097383	0.053416		144.4	3.01184	2.19661	1.43538	0.783022	0.344104	0.1917	0.081993
	144.6	2.39625	1.44471	0.616146	0.259784	0.080626	0.119226	0.060524		144.6	3.27914	2.62639	1.5183	0.653255	0.274554	0.097322	0.053624		144.6	3.01302	2.19747	1.4361	0.783636	0.344675	0.191938	0.082167
	144.8	2.39745	1.44562	0.617204	0.26031	0.080589	0.119248	0.060536		144.8	3.28002	2.62763	1.51951	0.654284	0.275003	0.097621	0.053699		144.8	3.01383	2.198	1.43656	0.784035	0.345006	0.192429	0.082304
	145	2.39858	1.44643	0.617872	0.260245	0.080322	0.118994	0.060313		145	3.28156	2.62958	1.5206	0.655517	0.27528	0.097886	0.053939		145	3.01539	2.19872	1.43694	0.784662	0.344996	0.192297	0.082713
	145.2	2.39993	1.44777	0.618714	0.26044	0.080396	0.118937	0.060488		145.2	3.28243	2.63102	1.52142	0.656235	0.275627	0.097601	0.054209		145.2	3.01676	2.19974	1.43762	0.785082	0.344748	0.192299	0.08314
	145.4	2.40097	1.44901	0.619216	0.260398	0.080393	0.118932	0.05979		145.4	3.28311	2.63229	1.52232	0.656783	0.275988	0.097577	0.054249		145.4	3.01763	2.20064	1.43808	0.785295	0.344869	0.192412	0.083813
	145.6	2.40238	1.45018	0.6197	0.260461	0.080178	0.118841	0.059355		145.6	3.28425	2.63379	1.52323	0.656969	0.276624	0.097549	0.054313		145.6	3.01878	2.20155	1.43851	0.785709	0.344763	0.192274	0.084168
	145.8	2.40329	1.45178	0.619729	0.260484	0.07994	0.119247	0.059689		145.8	3.28542	2.63515	1.52444	0.657323	0.276944	0.097795	0.054678		145.8	3.01935	2.20161	1.43882	0.785831	0.344031	0.192326	0.08403
	146	2.40469	1.45354	0.620742	0.260673	0.0802	0.120052	0.060101		146	3.28612	2.63633	1.5257	0.657749	0.277544	0.097572	0.054957		146	3.01976	2.20229	1.43902	0.786222	0.343692	0.192273	0.083649
	146.2	2.4053	1.45437	0.620803	0.260414	0.079853	0.119707	0.059575		146.2	3.28677	2.63706	1.52686	0.657728	0.277393	0.097357	0.054427		146.2	3.0205	2.20287	1.43883	0.786312	0.343522	0.192597	0.083646
	146.4	2.40641	1.45537	0.621543	0.260128	0.079378	0.119207	0.059217		146.4	3.28774	2.63846	1.52863	0.658318	0.27819	0.09775	0.054483		146.4	3.02134	2.20342	1.43888	0.786711	0.343799	0.192776	0.083819
	146.6	2.40742	1.45677	0.62188	0.260495	0.079373	0.119437	0.05921		146.6	3.28826	2.63931	1.52965	0.658431	0.278302	0.097836	0.05456		146.6	3.02217	2.20384	1.43986	0.787107	0.343998	0.192817	0.083857
	146.8	2.4082	1.45816	0.622393	0.26059	0.078936	0.11912	0.059662		146.8	3.28911	2.64041	1.53145	0.658486	0.278742	0.097991	0.054494		146.8	3.02299	2.20449	1.44031	0.787701	0.344336	0.193186	0.084006
	147	2.40926	1.45931	0.622806	0.260897	0.07922	0.119187	0.05991		147	3.29071	2.64162	1.53332	0.659253	0.279829	0.097823	0.05458		147	3.0239	2.20505	1.44113	0.787636	0.344317	0.193593	0.083955
	147.2	2.41009	1.46068	0.623092	0.261018	0.078804	0.118963	0.060294		147.2	3.29112	2.64212	1.53503	0.659504	0.280191	0.097987	0.05434		147.2	3.02476	2.20537	1.44145	0.78808	0.344649	0.193629	0.084562
	147.4	2.41117	1.46239	0.624212	0.261375	0.079147	0.119253	0.060315		147.4	3.29198	2.64303	1.53649	0.659991	0.280698	0.098043	0.054186		147.4	3.02544	2.20661	1.44181	0.787916	0.345108	0.193692	0.084547
	147.6	2.41177	1.46293	0.624593	0.261643	0.078868	0.118637	0.060277		147.6	3.29274	2.64411	1.53819	0.660818	0.281358	0.098129	0.054708		147.6	3.02609	2.20712	1.44291	0.788276	0.345172	0.193554	0.084452
	147.8	2.41278	1.46399	0.625695	0.261768	0.079176	0.118624	0.060441		147.8	3.29318	2.64521	1.53984	0.661675	0.28171	0.0979	0.055106		147.8	3.02678	2.20789	1.44379	0.789299	0.345851	0.194268	0.084668
	148	2.41395	1.46441	0.626116	0.261902	0.079172	0.118152	0.060845		148	3.29352	2.6457	1.54106	0.662166	0.281502	0.097574	0.054744		148	3.02756	2.20861	1.4445	0.789619	0.346393	0.194409	0.084439
	148.2	2.41582	1.46546	0.627354	0.262558	0.079754	0.118362	0.061077		148.2	3.29461	2.64724	1.54257	0.663166	0.282385	0.097994	0.055327		148.2	3.02857	2.20943	1.44503	0.789931	0.346584	0.194814	0.084308
	148.4	2.41663	1.4662	0.628425	0.263235	0.079947	0.118717	0.061176		148.4	3.29511	2.64839	1.54381	0.664341	0.282746	0.09862	0.055188		148.4	3.02931	2.21059	1.44593	0.79032	0.347024	0.19426	0.084347
	148.6	2.41816	1.46736	0.629224	0.264042	0.080113	0.118801	0.061131		148.6	3.29549	2.64923	1.545	0.665372	0.283599	0.099444	0.055254		148.6	3.02998	2.21104	1.44627	0.790544	0.347468	0.194456	0.084536
	148.8	2.41893	1.46836	0.629994	0.264426	0.08026	0.118622	0.060986		148.8	3.2965	2.65076	1.54642	0.666491	0.283496	0.100051	0.055674		148.8	3.03034	2.2113	1.44649	0.791069	0.347463	0.194816	0.084674
	149	2.42013	1.46986	0.631003	0.264884	0.080597	0.11896	0.061164		149	3.29755	2.6525	1.54751	0.667633	0.28372	0.100564	0.055962		149	3.03087	2.21165	1.44678	0.791155	0.347277	0.194387	0.084077
	149.2	2.4212	1.47097	0.631814	0.265537	0.080496	0.119005	0.060657		149.2	3.29835	2.65328	1.54816	0.668769	0.283948	0.100612	0.055949		149.2	3.03161	2.21284	1.4477	0.791894	0.3475	0.194423	0.084402
	149.4	2.4226	1.47252	0.632945	0.266375	0.080932	0.119283	0.060672		149.4	3.29905	2.65459	1.54909	0.669889	0.28385	0.101157	0.055721		149.4	3.03198	2.21307	1.44772	0.792513	0.34712	0.194469	0.084326
	149.6	2.4235	1.47341	0.63304	0.266572	0.080566	0.119454	0.060604		149.6	3.30061	2.65626	1.55106	0.671245	0.284503	0.101825	0.056057		149.6	3.0326	2.2135	1.4477	0.792833	0.346834	0.194173	0.084459
	149.8	2.42434	1.47496	0.633249	0.266935	0.080818	0.119887	0.060595		149.8	3.30162	2.6574	1.55234	0.672384	0.284812	0.102383	0.056189		149.8	3.03331	2.2142	1.44824	0.793054	0.346857	0.19466	0.084811
	150	2.42541	1.47665	0.634844	0.267478	0.081273	0.12014	0.060781		150	3.30279	2.65892	1.55406	0.673557	0.28527	0.103062	0.056432		150	3.0345	2.21525	1.44846	0.793902	0.347032	0.195193	0.085272
	150.2	2.42637	1.47792	0.635315	0.267938	0.081366	0.120068	0.060387		150.2	3.30422	2.66015	1.55497	0.67471	0.28591	0.103738	0.056384		150.2	3.03539	2.21595	1.44863	0.793919	0.346944	0.194998	0.085525
	150.4	2.42777	1.47944	0.635937	0.268215	0.081746	0.120546	0.060406		150.4	3.30558	2.66165	1.55646	0.675682	0.285975	0.104233	0.056931		150.4	3.03646	2.2163	1.44895	0.794379	0.346857	0.194762	0.085505
	150.6	2.4285	1.48093	0.636433	0.2687	0.081638	0.120847	0.060783		150.6	3.30629	2.66276	1.55747	0.675903	0.285456	0.104087	0.056703		150.6	3.03807	2.217	1.45	0.795251	0.347546	0.19485	0.085846
	150.8	2.42964	1.48259	0.637679	0.269156	0.082031	0.121361	0.061397		150.8	3.30768	2.66397	1.55895	0.676634	0.286004	0.10416	0.05684		150.8	3.0393	2.21773	1.45085	0.795848	0.3479	0.195302	0.086204
	151	2.43083	1.48415	0.638436	0.269367	0.082579	0.1217	0.061595		151	3.30855	2.66494	1.56031	0.677217	0.285882	0.103584	0.056772		151	3.04012	2.21857	1.45165	0.796053	0.34823	0.19566	0.086568
	151.2	2.43151	1.4856	0.638894	0.268988	0.082251	0.121934	0.061828		151.2	3.30996	2.66648	1.56142	0.677867	0.286259	0.103674	0.05706		151.2	3.04094	2.21934	1.45191	0.796573	0.348669	0.195808	0.086961
	151.4	2.4325	1.48676	0.639309	0.268983	0.082792	0.121644	0.061498		151.4	3.31111	2.66791	1.56266	0.67856	0.286727	0.103261	0.05747		151.4	3.04144	2.22022	1.45216	0.79652	0.348933	0.195482	0.086181
	151.6	2.43359	1.48812	0.639916	0.269539	0.083084	0.121599	0.061875		151.6	3.3118	2.66869	1.56423	0.679165	0.286689	0.103428	0.057589		151.6	3.04257	2.22101	1.45296	0.797262	0.34971	0.196029	0.086478
	151.8	2.43451	1.48925	0.640637	0.269334	0.083146	0.121377	0.061622		151.8	3.31274	2.67016	1.56524	0.679993	0.286848	0.103231	0.057605		151.8	3.04378	2.2219	1.45357	0.798142	0.350232	0.196315	0.086448
	152	2.43587	1.49014	0.641262	0.269405	0.083324	0.121604	0.062308		152	3.31384	2.67149	1.56663	0.680645	0.287293	0.103299	0.057668		152	3.04468	2.2224	1.454	0.798309	0.350481	0.196179	0.086098
	152.2	2.43684	1.49184	0.64242	0.26994	0.083554	0.121893	0.062608		152.2	3.31453	2.67295	1.56827	0.681495	0.288018	0.103393	0.057418		152.2	3.04549	2.22273	1.45444	0.798347	0.350652	0.196182	0.085947
	152.4	2.4377	1.49313	0.643241	0.270534	0.083753	0.121885	0.062434		152.4	3.31445	2.67393	1.56941	0.682182	0.288531	0.103662	0.057258		152.4	3.0464	2.22254	1.45503	0.798091	0.350564	0.195972	0.085467
	152.6	2.43832	1.4942	0.643885	0.270821	0.083626	0.121507	0.062246		152.6	3.31469	2.67517	1.57064	0.682571	0.288148	0.103086	0.056872		152.6	3.04749	2.22295	1.45571	0.798745	0.351232	0.196814	0.085263
	152.8	2.43892	1.49541	0.644662	0.271254	0.08396	0.121803	0.062694		152.8	3.31602	2.67701	1.57251	0.683656	0.288806	0.10318	0.057585		152.8	3.04835	2.22318	1.45626	0.799266	0.351195	0.197632	0.085046
	153	2.43948	1.496	0.645328	0.271416	0.083512	0.121411	0.062384		153	3.3167	2.67842	1.57382	0.684454	0.289518	0.103138	0.057494		153	3.04883	2.22341	1.45653	0.799635	0.351005	0.197506	0.084298
	153.2	2.44028	1.49696	0.645472	0.271394	0.083362	0.12119	0.062268		153.2	3.31722	2.67917	1.57549	0.685258	0.28978	0.10306	0.057464		153.2	3.05009	2.22427	1.45692	0.80052	0.351603	0.19778	0.084863
	153.4	2.44085	1.49815	0.646406	0.271476	0.083283	0.121307	0.062791		153.4	3.31873	2.68088	1.57801	0.686651	0.290874	0.103837	0.058004		153.4	3.05163	2.2252	1.45731	0.800727	0.351666	0.198316	0.085066
	153.6	2.44119	1.49922	0.646943	0.271616	0.082995	0.121351	0.062577		153.6	3.31983	2.68209	1.57981	0.68783	0.291736	0.103916	0.058445		153.6	3.05283	2.22624	1.45788	0.801114	0.351983	0.198827	0.085645
	153.8	2.44206	1.50055	0.647677	0.271949	0.083221	0.121196	0.06282		153.8	3.32058	2.68314	1.58132	0.68887	0.292855	0.104316	0.058505		153.8	3.05374	2.22711	1.45848	0.80122	0.351746	0.198554	0.085378
	154	2.44277	1.50168	0.648641	0.272174	0.082833	0.121173	0.062922		154	3.32214	2.68475	1.58332	0.690364	0.293866	0.104644	0.058811		154	3.05456	2.2277	1.45889	0.801785	0.351563	0.198467	0.085796
	154.2	2.44358	1.50262	0.649112	0.271986	0.082524	0.120919	0.062847		154.2	3.32308	2.68534	1.58471	0.691075	0.294263	0.104794	0.058788		154.2	3.05529	2.22829	1.45964	0.802032	0.351445	0.19802	0.085678
	154.4	2.4443	1.50404	0.649548	0.272361	0.082549	0.121253	0.062962		154.4	3.32384	2.68642	1.58664	0.691435	0.294236	0.104748	0.05898		154.4	3.05608	2.22877	1.46036	0.802349	0.351564	0.197628	0.08579
	154.6	2.44524	1.50577	0.650834	0.272838	0.08292	0.121225	0.063105		154.6	3.32449	2.6878	1.58756	0.691756	0.294388	0.104461	0.058254		154.6	3.05675	2.22991	1.46052	0.803028	0.352101	0.197569	0.086286
	154.8	2.44654	1.50754	0.652057	0.273241	0.083051	0.12181	0.063255		154.8	3.32516	2.68863	1.58893	0.692357	0.294603	0.104446	0.05779		154.8	3.05695	2.23087	1.46123	0.803635	0.352567	0.197329	0.086408
	155	2.44791	1.50933	0.653224	0.273676	0.08342	0.122158	0.06336		155	3.32637	2.69001	1.59022	0.693064	0.295027	0.10449	0.057753		155	3.05721	2.23146	1.46117	0.803257	0.352725	0.197	0.08615
	155.2	2.4492	1.51059	0.654268	0.273851	0.083304	0.122143	0.063043		155.2	3.32779	2.69096	1.59099	0.693694	0.295703	0.104812	0.058118		155.2	3.05749	2.23272	1.46156	0.803206	0.352933	0.196536	0.085806
	155.4	2.45054	1.51182	0.655014	0.274587	0.083499	0.121921	0.062625		155.4	3.32824	2.69203	1.59235	0.694535	0.296376	0.105071	0.05836		155.4	3.05796	2.23371	1.46205	0.803491	0.353439	0.196128	0.085898
	155.6	2.45153	1.51297	0.655728	0.274923	0.083479	0.122107	0.062859		155.6	3.32878	2.6932	1.59337	0.695286	0.296267	0.105048	0.058253		155.6	3.0585	2.2344	1.46278	0.804217	0.353854	0.196573	0.086134
	155.8	2.45275	1.51396	0.656997	0.275597	0.08353	0.122551	0.062931		155.8	3.32923	2.69455	1.59461	0.696003	0.296059	0.10492	0.058125		155.8	3.05885	2.23545	1.46344	0.80438	0.354251	0.196407	0.085706
	156	2.45364	1.51453	0.658103	0.276145	0.083301	0.122109	0.062942		156	3.32964	2.6953	1.59575	0.69695	0.296527	0.105006	0.058091		156	3.05986	2.23614	1.46424	0.804523	0.354531	0.196641	0.085889
	156.2	2.45433	1.51559	0.658998	0.277025	0.083358	0.121908	0.062937		156.2	3.33015	2.69648	1.59692	0.697717	0.296881	0.104942	0.058193		156.2	3.06049	2.23661	1.46479	0.804647	0.354848	0.196679	0.08579
	156.4	2.45521	1.51586	0.659402	0.277056	0.08282	0.121302	0.062538		156.4	3.33077	2.69773	1.59831	0.698514	0.29713	0.105811	0.058693		156.4	3.06109	2.23645	1.46506	0.80423	0.354828	0.19664	0.085666
	156.6	2.45612	1.51689	0.660509	0.278001	0.083247	0.121467	0.062793		156.6	3.33167	2.6988	1.59888	0.69905	0.297024	0.105519	0.058779		156.6	3.06225	2.23732	1.46569	0.804963	0.355098	0.197485	0.085607
	156.8	2.45745	1.51823	0.661429	0.278413	0.083943	0.121895	0.063176		156.8	3.33284	2.7004	1.60045	0.70021	0.297871	0.106112	0.059408		156.8	3.06332	2.23833	1.46674	0.805791	0.35528	0.198437	0.086418
	157	2.45854	1.51921	0.662028	0.278814	0.083952	0.122091	0.06309		157	3.33359	2.70125	1.60183	0.700793	0.297911	0.106704	0.05948		157	3.06375	2.23917	1.46742	0.80576	0.355296	0.198428	0.086288
	157.2	2.45957	1.52045	0.662808	0.279242	0.084356	0.122644	0.063695		157.2	3.33434	2.702	1.60293	0.701682	0.298187	0.1068	0.060017		157.2	3.06514	2.23974	1.4679	0.806006	0.355688	0.199123	0.086701
	157.4	2.46002	1.52097	0.663142	0.27917	0.084177	0.122676	0.063781		157.4	3.33551	2.70303	1.60433	0.702792	0.29874	0.107326	0.06035		157.4	3.06639	2.24048	1.46844	0.806296	0.355437	0.199464	0.086779
	157.6	2.46044	1.52194	0.663541	0.279051	0.084229	0.122438	0.063517		157.6	3.33537	2.7033	1.60517	0.703472	0.298698	0.107004	0.059889		157.6	3.067	2.24066	1.46859	0.806871	0.355323	0.199476	0.086849
	157.8	2.46135	1.52302	0.663924	0.27913	0.084078	0.122387	0.063052		157.8	3.33643	2.70436	1.60633	0.703896	0.29901	0.107615	0.05994		157.8	3.06791	2.24114	1.46927	0.807178	0.355254	0.199223	0.086608
	158	2.46201	1.5239	0.664293	0.278613	0.084145	0.122167	0.062865		158	3.33799	2.7061	1.60821	0.705107	0.299737	0.108157	0.060376		158	3.0687	2.24165	1.46957	0.807397	0.355383	0.199889	0.087245
	158.2	2.46284	1.52557	0.664961	0.278269	0.084399	0.122232	0.06307		158.2	3.33921	2.70704	1.6097	0.705678	0.300159	0.108175	0.060181		158.2	3.06966	2.2424	1.46998	0.807869	0.355448	0.19993	0.087414
	158.4	2.46397	1.52763	0.666156	0.279065	0.085185	0.123148	0.063384		158.4	3.3402	2.70829	1.61118	0.706392	0.300313	0.107926	0.060073		158.4	3.07026	2.24273	1.47015	0.808018	0.355689	0.199809	0.087452
	158.6	2.46479	1.52941	0.666471	0.279099	0.085325	0.123315	0.063796		158.6	3.34092	2.71013	1.61215	0.707143	0.300692	0.107911	0.059352		158.6	3.07076	2.24325	1.47007	0.808666	0.355643	0.199468	0.087091
	158.8	2.4659	1.5306	0.667098	0.279159	0.085337	0.123652	0.063731		158.8	3.34166	2.71076	1.6136	0.707792	0.300974	0.108061	0.059111		158.8	3.07139	2.24375	1.47088	0.809128	0.35579	0.199514	0.086721
	159	2.46697	1.53185	0.667739	0.279654	0.085708	0.124009	0.063992		159	3.34247	2.71151	1.61438	0.707911	0.301034	0.107979	0.058974		159	3.07199	2.24425	1.47092	0.80872	0.355458	0.199269	0.086221
	159.2	2.46762	1.53257	0.667855	0.279579	0.085511	0.123485	0.063889		159.2	3.34305	2.71254	1.61554	0.708394	0.301639	0.107867	0.058763		159.2	3.07229	2.24507	1.47104	0.809384	0.355007	0.198901	0.085828
	159.4	2.46835	1.53367	0.66821	0.280106	0.085514	0.123679	0.064038		159.4	3.34319	2.71338	1.61655	0.70903	0.301972	0.107352	0.058595		159.4	3.07357	2.24589	1.47177	0.810252	0.355302	0.199258	0.086444
	159.6	2.46941	1.53452	0.66881	0.28061	0.085585	0.123968	0.064903		159.6	3.34333	2.71377	1.61733	0.709133	0.301272	0.106749	0.058161		159.6	3.07429	2.24632	1.47214	0.810823	0.355595	0.19958	0.086433
	159.8	2.47078	1.53577	0.669491	0.281676	0.085996	0.123963	0.065514		159.8	3.34414	2.71454	1.61875	0.709744	0.301535	0.106817	0.058054		159.8	3.07483	2.24722	1.47215	0.811231	0.356235	0.199518	0.086487
	160	2.47164	1.53618	0.669781	0.282071	0.085609	0.123611	0.06547		160	3.3453	2.71601	1.6199	0.710931	0.302939	0.107155	0.058625		160	3.07609	2.2477	1.4724	0.811631	0.356175	0.199685	0.086931
	160.2	2.47284	1.5376	0.670444	0.282894	0.085946	0.124062	0.06614		160.2	3.34565	2.7173	1.62112	0.711357	0.303696	0.10752	0.059004		160.2	3.07639	2.2473	1.47257	0.811889	0.356107	0.199408	0.086638
	160.4	2.47419	1.53906	0.6713	0.283331	0.086247	0.124185	0.066127		160.4	3.34585	2.71794	1.62146	0.711999	0.304159	0.107744	0.059248		160.4	3.07762	2.24778	1.47311	0.812083	0.35658	0.199665	0.086932
	160.6	2.47536	1.54071	0.672208	0.284238	0.086593	0.124559	0.066425		160.6	3.34633	2.71902	1.62176	0.712138	0.304462	0.107581	0.059681		160.6	3.07861	2.24888	1.47416	0.812676	0.357364	0.199959	0.087131
	160.8	2.47638	1.5422	0.672765	0.284192	0.086971	0.125002	0.066317		160.8	3.34729	2.72078	1.62384	0.713487	0.305297	0.108213	0.060611		160.8	3.07937	2.24988	1.47541	0.813832	0.357775	0.200535	0.087502
	161	2.47703	1.54324	0.673468	0.284673	0.087166	0.125171	0.066157		161	3.34794	2.72135	1.62486	0.714562	0.305681	0.108565	0.061197		161	3.0802	2.25062	1.47572	0.813734	0.358184	0.200746	0.087459
	161.2	2.47744	1.54401	0.674045	0.284788	0.087204	0.124766	0.06644		161.2	3.34817	2.72219	1.62572	0.715134	0.305714	0.108097	0.061152		161.2	3.08111	2.25113	1.47625	0.813989	0.358885	0.201586	0.088124
	161.4	2.47821	1.545	0.67441	0.284683	0.087056	0.124865	0.065927		161.4	3.34913	2.7235	1.62732	0.716101	0.306212	0.108546	0.06132		161.4	3.08204	2.25154	1.47703	0.814554	0.359509	0.201589	0.088099
	161.6	2.47948	1.547	0.675889	0.285534	0.087695	0.125363	0.065704		161.6	3.34977	2.72433	1.62863	0.717089	0.306317	0.108323	0.061344		161.6	3.08276	2.25245	1.4778	0.815017	0.360611	0.202168	0.088723
	161.8	2.4805	1.5482	0.677047	0.285887	0.087795	0.125634	0.065327		161.8	3.35078	2.72602	1.63026	0.717681	0.306584	0.10844	0.061326		161.8	3.08319	2.25313	1.47883	0.815621	0.361344	0.202409	0.089012
	162	2.48085	1.5488	0.677552	0.285784	0.087789	0.125125	0.065038		162	3.3521	2.72745	1.63172	0.719061	0.307722	0.108593	0.06153		162	3.08354	2.25359	1.47947	0.815716	0.361638	0.202376	0.089324
	162.2	2.48163	1.55021	0.678564	0.286449	0.088339	0.12545	0.064928		162.2	3.35339	2.72868	1.63342	0.720124	0.308203	0.108844	0.061647		162.2	3.08391	2.25398	1.48026	0.816259	0.362353	0.202242	0.08975
	162.4	2.4821	1.55131	0.679192	0.286954	0.088252	0.125315	0.064994		162.4	3.35429	2.73035	1.63551	0.721369	0.308432	0.109245	0.061448		162.4	3.08447	2.25422	1.48109	0.81667	0.362528	0.20175	0.089685
	162.6	2.48298	1.55228	0.679558	0.287289	0.088253	0.125192	0.065282		162.6	3.35506	2.73217	1.63724	0.723047	0.308987	0.109773	0.061108		162.6	3.08439	2.25444	1.48179	0.816637	0.361899	0.200984	0.088863
	162.8	2.48393	1.55251	0.68041	0.28753	0.088369	0.12498	0.064747		162.8	3.35582	2.73332	1.6393	0.723743	0.308624	0.110011	0.060769		162.8	3.08517	2.25476	1.48255	0.816662	0.361587	0.200855	0.089046
	163	2.48444	1.55325	0.68125	0.287994	0.088442	0.124996	0.0646		163	3.35672	2.73461	1.64052	0.724124	0.308649	0.110159	0.060163		163	3.08546	2.25502	1.48266	0.816545	0.360847	0.199862	0.088734
	163.2	2.48587	1.55442	0.682345	0.288049	0.0886	0.125282	0.064611		163.2	3.35753	2.73552	1.64174	0.724932	0.308745	0.10999	0.060074		163.2	3.08646	2.25589	1.48351	0.817225	0.360639	0.199799	0.089016
	163.4	2.48696	1.55571	0.683521	0.288515	0.088934	0.125595	0.064876		163.4	3.35817	2.73584	1.64273	0.725754	0.308231	0.109782	0.059652		163.4	3.08776	2.25656	1.48395	0.81769	0.361111	0.200443	0.08976
	163.6	2.48795	1.55683	0.684364	0.288919	0.08915	0.12596	0.065443		163.6	3.3585	2.73688	1.64343	0.726317	0.3081	0.109601	0.059472		163.6	3.08816	2.25689	1.48381	0.817709	0.361293	0.200535	0.0895
	163.8	2.48875	1.55744	0.684696	0.288717	0.089056	0.125785	0.065317		163.8	3.35931	2.73861	1.64471	0.727238	0.308723	0.109976	0.060178		163.8	3.08893	2.2573	1.48354	0.817742	0.361173	0.200576	0.08943
	164	2.48977	1.5585	0.68562	0.288773	0.088919	0.126454	0.065706		164	3.36008	2.73955	1.6458	0.727923	0.309382	0.110762	0.060652		164	3.09004	2.25779	1.48362	0.817864	0.361008	0.200699	0.089297
	164.2	2.49065	1.56022	0.686926	0.289036	0.089403	0.126591	0.065652		164.2	3.36035	2.74005	1.64648	0.728545	0.309701	0.110828	0.060312		164.2	3.09115	2.25855	1.48392	0.818178	0.361502	0.20113	0.089331
	164.4	2.49121	1.56119	0.687464	0.288352	0.089266	0.126286	0.06519		164.4	3.36058	2.73989	1.64637	0.728457	0.309137	0.109962	0.060171		164.4	3.09205	2.25988	1.48404	0.818718	0.361793	0.201636	0.089015
	164.6	2.49186	1.5622	0.687671	0.287444	0.088515	0.125732	0.064759		164.6	3.36151	2.74093	1.64777	0.729229	0.309666	0.110494	0.060558		164.6	3.09338	2.26112	1.48424	0.819469	0.362327	0.202206	0.089542
	164.8	2.49243	1.56311	0.688294	0.287021	0.088464	0.125697	0.064419		164.8	3.36239	2.74189	1.64908	0.731035	0.310443	0.11022	0.060885		164.8	3.0948	2.2624	1.48466	0.820101	0.362148	0.203057	0.08944
	165	2.49297	1.5639	0.688774	0.286455	0.087764	0.125429	0.064326		165	3.36332	2.74289	1.65004	0.732363	0.311076	0.110039	0.061232		165	3.09605	2.26348	1.48491	0.82021	0.362675	0.203883	0.089989
	165.2	2.49391	1.56513	0.689316	0.286982	0.087658	0.125627	0.064375		165.2	3.36413	2.74387	1.65142	0.733103	0.311407	0.110341	0.061175		165.2	3.09697	2.26488	1.48538	0.820176	0.362925	0.204532	0.090347
	165.4	2.4952	1.56652	0.69011	0.287808	0.08798	0.126569	0.06442		165.4	3.36465	2.74496	1.65242	0.734017	0.311709	0.110357	0.06111		165.4	3.09766	2.26526	1.48599	0.820843	0.363173	0.204849	0.089825
	165.6	2.49621	1.56793	0.691442	0.288599	0.088865	0.126769	0.064755		165.6	3.36495	2.7459	1.65347	0.734494	0.311883	0.110382	0.060975		165.6	3.09844	2.26657	1.48645	0.821364	0.363472	0.205216	0.090104
	165.8	2.49683	1.56891	0.691923	0.289016	0.088861	0.12645	0.064618		165.8	3.36558	2.74695	1.65479	0.734972	0.312287	0.110717	0.06093		165.8	3.09906	2.26719	1.48675	0.821604	0.363328	0.205257	0.09005
	166	2.49734	1.56997	0.692542	0.289234	0.088884	0.126085	0.064642		166	3.36604	2.74755	1.65551	0.735397	0.312287	0.110647	0.060919		166	3.09988	2.26786	1.48716	0.821772	0.363634	0.205223	0.089783
	166.2	2.49836	1.57127	0.69347	0.289919	0.089559	0.126034	0.064569		166.2	3.3664	2.74842	1.65734	0.735925	0.31238	0.110821	0.060586		166.2	3.10012	2.26825	1.48775	0.821994	0.363625	0.205401	0.089435
	166.4	2.49944	1.57282	0.694269	0.290641	0.089477	0.125825	0.065008		166.4	3.36743	2.7502	1.65934	0.737257	0.312875	0.111146	0.060545		166.4	3.10103	2.26925	1.48831	0.82239	0.363341	0.205417	0.089527
	166.6	2.501	1.57416	0.695411	0.291537	0.089664	0.125906	0.065204		166.6	3.36837	2.75183	1.66125	0.738209	0.313184	0.11156	0.060928		166.6	3.10153	2.27001	1.48914	0.822763	0.363001	0.205405	0.08952
	166.8	2.50175	1.57469	0.696319	0.291779	0.089659	0.126041	0.0647		166.8	3.36935	2.753	1.66304	0.738289	0.31351	0.111782	0.061009		166.8	3.10257	2.27108	1.48989	0.823391	0.363462	0.205308	0.090273
	167	2.50253	1.57636	0.697831	0.292653	0.090567	0.12644	0.065162		167	3.37053	2.75408	1.66386	0.738598	0.31391	0.11199	0.061214		167	3.10314	2.27166	1.49035	0.823977	0.364106	0.205062	0.090413
	167.2	2.50386	1.57795	0.698889	0.293589	0.090974	0.126732	0.065683		167.2	3.37097	2.75507	1.66536	0.739143	0.313983	0.111846	0.061709		167.2	3.1038	2.272	1.49125	0.824404	0.364699	0.204993	0.090175
	167.4	2.50435	1.57904	0.699525	0.294226	0.091446	0.126666	0.065775		167.4	3.37183	2.75648	1.66681	0.74008	0.314853	0.112435	0.06226		167.4	3.10444	2.27188	1.49139	0.824562	0.364969	0.205162	0.090343
	167.6	2.5051	1.58021	0.700085	0.294995	0.091665	0.126965	0.06602		167.6	3.37222	2.75842	1.66826	0.74078	0.3153	0.112704	0.06298		167.6	3.10525	2.2725	1.49172	0.82492	0.365259	0.205307	0.090757
	167.8	2.50628	1.58108	0.700896	0.295687	0.091779	0.127139	0.066359		167.8	3.37336	2.75922	1.67016	0.741626	0.315737	0.112957	0.063496		167.8	3.10596	2.27253	1.49198	0.825301	0.365316	0.205033	0.090735
	168	2.50805	1.58323	0.701886	0.296712	0.092739	0.127819	0.066861		168	3.37452	2.76015	1.67117	0.742079	0.316804	0.113298	0.0635		168	3.10607	2.27231	1.49169	0.8252	0.365235	0.204516	0.090618
	168.2	2.50893	1.58458	0.70286	0.29707	0.093127	0.127884	0.066941		168.2	3.37508	2.76067	1.67194	0.742616	0.316851	0.11277	0.063184		168.2	3.10723	2.27318	1.49209	0.82614	0.365483	0.204672	0.090916
	168.4	2.50978	1.58511	0.702587	0.296577	0.092415	0.127188	0.066802		168.4	3.37594	2.76164	1.67346	0.743225	0.317395	0.113107	0.063147		168.4	3.10781	2.27334	1.49258	0.826637	0.365025	0.204426	0.090775
	168.6	2.51044	1.58609	0.702498	0.296353	0.092221	0.127059	0.067076		168.6	3.37691	2.76307	1.67471	0.744627	0.318713	0.113595	0.063652		168.6	3.109	2.2741	1.49323	0.826844	0.365448	0.204578	0.091237
	168.8	2.5112	1.58714	0.702714	0.29659	0.092099	0.127305	0.067429		168.8	3.37796	2.76432	1.67622	0.745881	0.319655	0.11337	0.063804		168.8	3.11027	2.27511	1.49428	0.826943	0.365609	0.204968	0.091279
	169	2.51235	1.58854	0.703722	0.296911	0.092552	0.12781	0.067803		169	3.37927	2.7655	1.67775	0.746573	0.320386	0.113529	0.063977		169	3.11083	2.27542	1.49449	0.827136	0.365572	0.204909	0.091275
	169.2	2.51349	1.58994	0.704994	0.298015	0.093209	0.128401	0.068512		169.2	3.37974	2.76588	1.67856	0.746887	0.320124	0.113614	0.063192		169.2	3.11133	2.27638	1.4949	0.827184	0.365684	0.205166	0.090985
	169.4	2.51421	1.59113	0.705867	0.298086	0.093457	0.128625	0.068915		169.4	3.38018	2.76714	1.67973	0.747559	0.320134	0.113629	0.062118		169.4	3.11156	2.2765	1.49513	0.827356	0.365408	0.20487	0.09061
	169.6	2.51495	1.59273	0.706875	0.298028	0.093317	0.128522	0.068907		169.6	3.38119	2.76821	1.68114	0.747973	0.320216	0.113827	0.062116		169.6	3.11204	2.27649	1.49473	0.8266	0.365209	0.204474	0.090086
	169.8	2.51587	1.59451	0.707641	0.298523	0.093156	0.129073	0.068845		169.8	3.3816	2.76853	1.68203	0.748347	0.319789	0.113456	0.061952		169.8	3.11238	2.27695	1.4949	0.826276	0.365146	0.204417	0.089574
	170	2.51664	1.59595	0.708765	0.29856	0.093219	0.129611	0.06898		170	3.38134	2.76893	1.68277	0.748707	0.319392	0.112581	0.060981		170	3.11272	2.27708	1.49556	0.826709	0.365435	0.204505	0.089023
	170.2	2.5175	1.59699	0.709792	0.298692	0.093263	0.129719	0.06893		170.2	3.38193	2.77009	1.6838	0.749169	0.319463	0.112621	0.060703		170.2	3.11349	2.27764	1.49648	0.827108	0.365241	0.204892	0.088965
	170.4	2.51847	1.59848	0.710865	0.299077	0.092867	0.130252	0.069124		170.4	3.38277	2.77192	1.68501	0.749999	0.319966	0.112878	0.060961		170.4	3.11407	2.27859	1.49677	0.827099	0.365068	0.204497	0.0887
	170.6	2.51901	1.59898	0.711249	0.298761	0.092761	0.130088	0.068578		170.6	3.38367	2.77325	1.68631	0.751118	0.320295	0.113595	0.061342		170.6	3.1149	2.27931	1.49723	0.827327	0.365359	0.204442	0.088775
	170.8	2.5196	1.59936	0.712104	0.29853	0.092535	0.129974	0.068007		170.8	3.38445	2.77401	1.68746	0.751806	0.3209	0.113379	0.061408		170.8	3.11557	2.28002	1.49825	0.827671	0.366198	0.204556	0.088545
	171	2.51976	1.59994	0.712545	0.298535	0.092569	0.129175	0.067661		171	3.38489	2.7748	1.68826	0.751946	0.32084	0.113394	0.061576		171	3.11616	2.28036	1.49855	0.827847	0.366652	0.204571	0.088409
	171.2	2.52063	1.60039	0.71311	0.298764	0.092684	0.12886	0.066895		171.2	3.38555	2.77613	1.6899	0.753087	0.321677	0.113671	0.062093		171.2	3.11681	2.28125	1.49938	0.828444	0.36683	0.204973	0.088314
	171.4	2.52107	1.60078	0.713334	0.298402	0.09225	0.128369	0.066396		171.4	3.38625	2.77667	1.691	0.754042	0.321782	0.114113	0.062286		171.4	3.11839	2.28214	1.49981	0.829367	0.367168	0.205701	0.088982
	171.6	2.52206	1.60175	0.713966	0.298622	0.092283	0.128456	0.06603		171.6	3.387	2.77759	1.69257	0.75542	0.322243	0.114466	0.062804		171.6	3.11915	2.28268	1.50011	0.830055	0.367186	0.205672	0.089199
	171.8	2.52347	1.60288	0.714854	0.299064	0.092688	0.128868	0.066094		171.8	3.38826	2.77799	1.69348	0.756182	0.322539	0.114788	0.06309		171.8	3.11954	2.28315	1.50023	0.830758	0.366964	0.205079	0.088867
	172	2.52449	1.60373	0.714884	0.299279	0.092928	0.128624	0.065835		172	3.38937	2.77936	1.69433	0.757044	0.323119	0.115486	0.063406		172	3.12005	2.28357	1.50015	0.830852	0.366893	0.2048	0.088646
	172.2	2.52509	1.60449	0.715473	0.299362	0.093135	0.128085	0.065735		172.2	3.38991	2.7797	1.6954	0.757999	0.323167	0.115697	0.06332		172.2	3.12123	2.28495	1.50069	0.832128	0.367125	0.205398	0.089026
	172.4	2.52555	1.60503	0.715364	0.299198	0.092791	0.127497	0.065578		172.4	3.39131	2.78077	1.69713	0.759531	0.324625	0.116938	0.063642		172.4	3.12184	2.28538	1.50105	0.832146	0.367111	0.20534	0.089378
	172.6	2.52602	1.60619	0.715913	0.29972	0.093203	0.127834	0.065866		172.6	3.39178	2.78112	1.69741	0.760316	0.324515	0.116767	0.063444		172.6	3.12265	2.28619	1.50166	0.832402	0.367156	0.205797	0.089321
	172.8	2.52714	1.6072	0.716921	0.30035	0.09382	0.128008	0.066186		172.8	3.3928	2.78175	1.69907	0.761328	0.325197	0.117006	0.063312		172.8	3.12382	2.28729	1.5022	0.833278	0.367811	0.206629	0.089824
	173	2.52859	1.60868	0.718404	0.30131	0.094655	0.128586	0.066814		173	3.39376	2.78253	1.70004	0.762028	0.325574	0.116973	0.062766		173	3.12344	2.28731	1.50224	0.833434	0.367946	0.206298	0.089567
	173.2	2.52939	1.60996	0.719153	0.302055	0.094845	0.128397	0.066504		173.2	3.39442	2.78337	1.70135	0.763174	0.325439	0.11736	0.062457		173.2	3.12379	2.28799	1.50249	0.83389	0.368231	0.206263	0.089416
	173.4	2.52992	1.61093	0.719697	0.302439	0.09477	0.128649	0.066447		173.4	3.39532	2.78481	1.70306	0.764226	0.326116	0.118145	0.06261		173.4	3.12483	2.28837	1.50288	0.834127	0.368317	0.206548	0.089597
	173.6	2.53116	1.61257	0.720595	0.30356	0.095192	0.129176	0.066905		173.6	3.39594	2.78577	1.70391	0.764719	0.325917	0.117921	0.062832		173.6	3.12484	2.28845	1.50329	0.833899	0.368655	0.206729	0.089375
	173.8	2.53203	1.61405	0.72161	0.304673	0.096212	0.129806	0.067603		173.8	3.39631	2.78683	1.70492	0.765133	0.325881	0.117853	0.062143		173.8	3.12516	2.2891	1.50409	0.834674	0.368835	0.206688	0.089393
	174	2.5329	1.61528	0.722482	0.305007	0.09643	0.13002	0.068372		174	3.3968	2.78846	1.70605	0.765717	0.32698	0.117896	0.062003		174	3.12572	2.28878	1.50434	0.835163	0.368631	0.206468	0.089558
	174.2	2.53353	1.61621	0.722801	0.305156	0.09649	0.130118	0.068639		174.2	3.39761	2.79019	1.7072	0.765923	0.327442	0.118148	0.06232		174.2	3.12631	2.28952	1.50491	0.835338	0.368484	0.206281	0.089172
	174.4	2.53447	1.61753	0.723312	0.30587	0.0964	0.130292	0.068472		174.4	3.39852	2.79222	1.70942	0.766937	0.328521	0.118893	0.0627		174.4	3.12667	2.29027	1.50493	0.835415	0.368922	0.205884	0.089012
	174.6	2.53498	1.61837	0.723189	0.305331	0.096	0.129644	0.068267		174.6	3.39936	2.79335	1.71097	0.768055	0.329387	0.11927	0.063367		174.6	3.12718	2.29095	1.50523	0.835474	0.369399	0.206068	0.089215
	174.8	2.5356	1.61948	0.723956	0.30547	0.09562	0.129556	0.068232		174.8	3.40022	2.79461	1.71219	0.768325	0.330065	0.118682	0.06328		174.8	3.12745	2.29185	1.50613	0.835777	0.369484	0.206061	0.089346
	175	2.53636	1.62023	0.724851	0.305513	0.095168	0.129224	0.068136		175	3.40115	2.79576	1.71349	0.769066	0.330382	0.119127	0.063145		175	3.12801	2.29256	1.50607	0.835923	0.369402	0.205709	0.089362
	175.2	2.53721	1.62157	0.725565	0.305455	0.095072	0.129212	0.068155		175.2	3.40217	2.79719	1.71526	0.770321	0.331396	0.119574	0.06334		175.2	3.12885	2.29346	1.50674	0.836329	0.36948	0.206011	0.089324
	175.4	2.538	1.62279	0.726187	0.305497	0.094598	0.129552	0.068629		175.4	3.4026	2.79833	1.7164	0.77071	0.331227	0.119458	0.062864		175.4	3.13033	2.29423	1.50724	0.83691	0.369682	0.206413	0.089592
	175.6	2.53853	1.62383	0.726696	0.305441	0.0944	0.129827	0.068679		175.6	3.40403	2.80022	1.718	0.772159	0.332045	0.120042	0.063627		175.6	3.13109	2.29508	1.50761	0.83716	0.370051	0.206381	0.089412
	175.8	2.53927	1.62442	0.727091	0.305395	0.09439	0.129237	0.068542		175.8	3.40484	2.80109	1.71865	0.772223	0.331872	0.119778	0.063367		175.8	3.13235	2.29598	1.50804	0.838133	0.370449	0.206391	0.089646
	176	2.53985	1.62519	0.727285	0.305338	0.093952	0.128805	0.067821		176	3.40571	2.80218	1.72007	0.772938	0.332278	0.119766	0.062923		176	3.13309	2.29664	1.50823	0.83799	0.370761	0.206739	0.089532
	176.2	2.54075	1.62639	0.728787	0.305689	0.094267	0.129066	0.067798		176.2	3.40566	2.80226	1.72037	0.77326	0.332489	0.118991	0.062175		176.2	3.13436	2.29757	1.50853	0.838604	0.371228	0.206874	0.090301
	176.4	2.54153	1.62744	0.729574	0.30587	0.094378	0.129832	0.067851		176.4	3.4065	2.80317	1.72129	0.773754	0.332608	0.119133	0.062126		176.4	3.13524	2.29771	1.50877	0.838391	0.371343	0.207116	0.090523
	176.6	2.54243	1.62796	0.730014	0.30627	0.094494	0.129873	0.067333		176.6	3.40715	2.80377	1.72208	0.774075	0.332313	0.118711	0.061974		176.6	3.13589	2.29782	1.50884	0.837943	0.371444	0.207501	0.090352
	176.8	2.54353	1.62876	0.730942	0.306606	0.094663	0.129544	0.06746		176.8	3.40793	2.80472	1.72341	0.774954	0.332969	0.118728	0.062304		176.8	3.13687	2.29855	1.50974	0.838616	0.37232	0.207944	0.091006
	177	2.54515	1.63046	0.73231	0.307748	0.09557	0.130228	0.067501		177	3.40809	2.8057	1.72405	0.775457	0.332941	0.118348	0.062147		177	3.13767	2.29877	1.51023	0.838926	0.372727	0.208357	0.091015
	177.2	2.54598	1.63128	0.732843	0.307983	0.095823	0.130002	0.066732		177.2	3.40862	2.8065	1.72551	0.776557	0.33271	0.118494	0.062303		177.2	3.1391	2.29963	1.51091	0.83949	0.372967	0.208738	0.091211
	177.4	2.54678	1.63136	0.733284	0.308103	0.095486	0.12973	0.066411		177.4	3.40889	2.80754	1.72628	0.776949	0.332848	0.118534	0.062624		177.4	3.14003	2.3002	1.51153	0.839842	0.373173	0.209259	0.091509
	177.6	2.5481	1.63271	0.733993	0.308379	0.095926	0.129359	0.066565		177.6	3.40965	2.80865	1.72729	0.777843	0.33265	0.118487	0.062844		177.6	3.14027	2.30075	1.51152	0.840067	0.37312	0.209405	0.091548
	177.8	2.54842	1.63333	0.734271	0.308434	0.095431	0.129005	0.066343		177.8	3.41035	2.8094	1.72867	0.778639	0.333552	0.118499	0.062625		177.8	3.14098	2.30104	1.51134	0.840626	0.372726	0.209124	0.091284
	178	2.54921	1.63446	0.734906	0.308668	0.095221	0.128642	0.066082		178	3.41068	2.81013	1.72949	0.779279	0.334197	0.118067	0.062818		178	3.14139	2.30123	1.5115	0.840819	0.372317	0.209035	0.091111
	178.2	2.54997	1.63535	0.73529	0.309213	0.09541	0.12904	0.065801		178.2	3.41109	2.81065	1.73093	0.779945	0.334103	0.118244	0.063375		178.2	3.14175	2.30217	1.51242	0.841305	0.37256	0.208932	0.090586
	178.4	2.5506	1.63687	0.735947	0.309704	0.094926	0.128957	0.065645		178.4	3.41138	2.81113	1.73214	0.781257	0.334614	0.118506	0.063513		178.4	3.14249	2.30286	1.51288	0.841511	0.373083	0.208808	0.090768
	178.6	2.55054	1.638	0.736161	0.309259	0.094243	0.128601	0.065591		178.6	3.41196	2.81184	1.73333	0.782183	0.334636	0.118583	0.063856		178.6	3.14283	2.30292	1.51298	0.84121	0.372863	0.208496	0.090415
	178.8	2.55117	1.63895	0.737245	0.309735	0.094291	0.128847	0.06594		178.8	3.41317	2.81329	1.73453	0.783614	0.335321	0.119464	0.064509		178.8	3.14369	2.30352	1.51344	0.841311	0.37242	0.208023	0.090952
	179	2.55251	1.64041	0.738519	0.310234	0.094026	0.129127	0.0665		179	3.41433	2.81441	1.73635	0.785026	0.336219	0.120046	0.064733		179	3.1446	2.30434	1.51413	0.842262	0.372922	0.208299	0.091131
	179.2	2.55292	1.64117	0.738783	0.310294	0.093985	0.128828	0.066582		179.2	3.41416	2.81514	1.73749	0.785452	0.336185	0.119868	0.06494		179.2	3.14553	2.30532	1.51527	0.842256	0.373594	0.208589	0.091498
	179.4	2.55353	1.64194	0.739897	0.310648	0.0941	0.128843	0.067092		179.4	3.41501	2.81673	1.73857	0.786188	0.336433	0.120476	0.065059		179.4	3.14719	2.30633	1.51636	0.84335	0.374735	0.209278	0.092367
	179.6	2.55408	1.64264	0.740223	0.310772	0.094056	0.128807	0.066856		179.6	3.41605	2.81769	1.73948	0.787208	0.33681	0.120794	0.065803		179.6	3.14809	2.30708	1.51705	0.843981	0.375448	0.209394	0.09238
	179.8	2.55498	1.64289	0.74094	0.311192	0.09466	0.128709	0.066586		179.8	3.41671	2.81813	1.74055	0.787368	0.337143	0.121	0.065654		179.8	3.14917	2.30822	1.51785	0.844571	0.375955	0.209382	0.093188
	180	2.55627	1.64422	0.74169	0.311402	0.094614	0.129521	0.066751		180	3.41809	2.81934	1.74213	0.788211	0.337933	0.121372	0.065724		180	3.14985	2.30943	1.51794	0.84448	0.376585	0.209621	0.093597
	180.2	2.5575	1.64545	0.74325	0.312199	0.095654	0.130739	0.067514		180.2	3.41833	2.81983	1.74273	0.788205	0.337669	0.121525	0.065489		180.2	3.15073	2.31013	1.51814	0.8448	0.377006	0.209284	0.093822
	180.4	2.55911	1.64672	0.74413	0.312867	0.096166	0.13123	0.067566		180.4	3.41978	2.82147	1.74453	0.78914	0.338423	0.122673	0.066518		180.4	3.15114	2.31064	1.51849	0.844621	0.377325	0.209924	0.093854
	180.6	2.56006	1.64766	0.744645	0.313326	0.096382	0.131294	0.067486		180.6	3.42112	2.82274	1.7458	0.790187	0.339336	0.12289	0.067738		180.6	3.15183	2.31113	1.5182	0.844184	0.37768	0.210222	0.093725
	180.8	2.5603	1.64856	0.745376	0.313595	0.09632	0.131228	0.067927		180.8	3.42172	2.82405	1.74686	0.791168	0.339569	0.122799	0.06795		180.8	3.15249	2.31207	1.51926	0.844671	0.377882	0.2108	0.093494
	181	2.56126	1.6498	0.746326	0.314299	0.096777	0.132083	0.067984		181	3.42243	2.82546	1.74793	0.791925	0.339936	0.122973	0.068489		181	3.15287	2.31217	1.51904	0.844349	0.377759	0.211061	0.092863
	181.2	2.56197	1.65059	0.746986	0.314421	0.096424	0.132203	0.068156		181.2	3.42346	2.82645	1.74927	0.793127	0.340514	0.123506	0.068826		181.2	3.15347	2.31272	1.51954	0.844174	0.377532	0.210641	0.092684
	181.4	2.56284	1.65147	0.747696	0.314807	0.096335	0.132075	0.06808		181.4	3.42451	2.82803	1.75083	0.794232	0.341174	0.12376	0.069728		181.4	3.15392	2.31295	1.51985	0.844538	0.377116	0.210763	0.092318
	181.6	2.56354	1.65329	0.748716	0.315455	0.097006	0.132097	0.068708		181.6	3.42532	2.82861	1.75182	0.795035	0.341752	0.123609	0.069749		181.6	3.15443	2.3138	1.52026	0.844706	0.37647	0.211229	0.092047
	181.8	2.56433	1.65471	0.749605	0.316519	0.097351	0.132238	0.068611		181.8	3.42529	2.82875	1.75264	0.795523	0.341909	0.122941	0.06888		181.8	3.15503	2.31399	1.52058	0.844827	0.375927	0.210971	0.0917
	182	2.56533	1.65651	0.75067	0.317583	0.098393	0.132637	0.06881		182	3.4258	2.82963	1.75389	0.795996	0.341858	0.122777	0.068401		182	3.15531	2.31434	1.52131	0.845081	0.375795	0.210808	0.091504
	182.2	2.56598	1.65795	0.751464	0.318189	0.098761	0.13301	0.069314		182.2	3.42622	2.83016	1.755	0.796416	0.342002	0.122881	0.068552		182.2	3.15606	2.31488	1.52199	0.845273	0.376017	0.210385	0.091347
	182.4	2.56642	1.65953	0.752279	0.318421	0.099138	0.133072	0.070092		182.4	3.42656	2.83064	1.75576	0.796802	0.342015	0.122677	0.067789		182.4	3.15698	2.31528	1.52232	0.845488	0.37596	0.210518	0.091776
	182.6	2.56667	1.66	0.752421	0.317953	0.099126	0.132772	0.070069		182.6	3.42749	2.83209	1.75746	0.797425	0.342404	0.122758	0.067749		182.6	3.15769	2.31519	1.52262	0.845844	0.375951	0.210401	0.092361
	182.8	2.568	1.66098	0.753519	0.31844	0.099556	0.133118	0.070951		182.8	3.42827	2.83299	1.75833	0.79813	0.343079	0.122657	0.067495		182.8	3.15803	2.3155	1.52325	0.845895	0.37575	0.209715	0.092745
	183	2.56933	1.66241	0.75428	0.31883	0.100025	0.133351	0.071056		183	3.42823	2.83411	1.75948	0.798647	0.343307	0.122141	0.066658		183	3.15892	2.31607	1.52378	0.846796	0.376605	0.209786	0.093018
	183.2	2.5697	1.66279	0.754328	0.318517	0.100341	0.13237	0.070567		183.2	3.42844	2.83501	1.76001	0.799403	0.343223	0.12208	0.066061		183.2	3.16015	2.31685	1.52445	0.847105	0.377229	0.20988	0.093286
	183.4	2.57062	1.66376	0.754631	0.318015	0.100193	0.132175	0.070222		183.4	3.42937	2.83622	1.76118	0.799784	0.343401	0.122747	0.065953		183.4	3.16103	2.31748	1.52508	0.848033	0.377656	0.20989	0.093846
	183.6	2.57186	1.66467	0.754925	0.318337	0.100642	0.132745	0.07014		183.6	3.4295	2.83688	1.76241	0.800509	0.343307	0.122831	0.065294		183.6	3.16185	2.31821	1.52545	0.848738	0.378052	0.209872	0.094159
	183.8	2.57275	1.66507	0.755706	0.318241	0.100796	0.132348	0.070353		183.8	3.43	2.83781	1.76397	0.80082	0.34336	0.1234	0.064628		183.8	3.16299	2.31947	1.52615	0.84954	0.378885	0.209717	0.094849
	184	2.57403	1.66596	0.756105	0.318072	0.100477	0.132559	0.070027		184	3.4304	2.83875	1.76518	0.801323	0.34378	0.123778	0.064329		184	3.16357	2.32018	1.52625	0.850068	0.378989	0.2096	0.094206
	184.2	2.57478	1.66673	0.756495	0.31801	0.100516	0.132594	0.06935		184.2	3.43062	2.83933	1.76622	0.801738	0.343734	0.124424	0.064451		184.2	3.16385	2.32049	1.52659	0.850592	0.379133	0.209387	0.093903
	184.4	2.57522	1.6673	0.756696	0.317979	0.099558	0.131959	0.068665		184.4	3.43185	2.84097	1.76787	0.802952	0.344301	0.124782	0.065375		184.4	3.16471	2.32127	1.52707	0.850713	0.379235	0.209624	0.093838
	184.6	2.57511	1.66754	0.756874	0.317649	0.098525	0.131775	0.068109		184.6	3.43244	2.84237	1.7689	0.803696	0.34465	0.124601	0.065946		184.6	3.16532	2.32199	1.52683	0.850763	0.379512	0.210013	0.093362
	184.8	2.5752	1.66769	0.756967	0.317848	0.097513	0.131412	0.067599		184.8	3.43327	2.84354	1.76992	0.80442	0.345154	0.124842	0.065991		184.8	3.16593	2.32255	1.52767	0.850938	0.37925	0.210148	0.09266
	185	2.57621	1.66863	0.757773	0.318571	0.09702	0.132018	0.067404		185	3.43462	2.84449	1.77095	0.804892	0.345138	0.125175	0.066576		185	3.16603	2.32242	1.52773	0.85102	0.378999	0.209627	0.092101
	185.2	2.57718	1.66972	0.759057	0.319215	0.096612	0.132339	0.067323		185.2	3.43535	2.84523	1.77229	0.806135	0.345782	0.125631	0.066985		185.2	3.1668	2.32326	1.52849	0.851353	0.379054	0.209698	0.09226
	185.4	2.5781	1.67106	0.760323	0.320039	0.097181	0.132695	0.067193		185.4	3.43596	2.84635	1.77326	0.806796	0.346008	0.125444	0.067308		185.4	3.16742	2.32439	1.52932	0.85159	0.379562	0.210375	0.092172
	185.6	2.57901	1.67285	0.761434	0.320869	0.097715	0.132977	0.067427		185.6	3.43657	2.84682	1.77429	0.807143	0.346134	0.12546	0.06697		185.6	3.16769	2.32502	1.52995	0.851562	0.379304	0.210814	0.091481
	185.8	2.58018	1.67447	0.762524	0.321743	0.098171	0.133393	0.067718		185.8	3.43707	2.84749	1.77559	0.808227	0.346633	0.125276	0.066968		185.8	3.16872	2.3257	1.53009	0.851622	0.379646	0.211032	0.09159
	186	2.58102	1.6758	0.763425	0.322388	0.098674	0.133392	0.068328		186	3.43799	2.84849	1.77676	0.808715	0.347158	0.125311	0.06677		186	3.16906	2.32621	1.53032	0.851215	0.379688	0.211176	0.091433
	186.2	2.5819	1.67711	0.764269	0.322646	0.098962	0.133629	0.068954		186.2	3.43843	2.84847	1.77779	0.809196	0.347308	0.125038	0.066421		186.2	3.1697	2.32689	1.53083	0.851174	0.379617	0.211709	0.091256
	186.4	2.58289	1.6784	0.765305	0.322697	0.099447	0.133918	0.069491		186.4	3.43903	2.84949	1.77861	0.810209	0.348032	0.124568	0.066354		186.4	3.1706	2.32788	1.53145	0.851339	0.380089	0.212459	0.091528
	186.6	2.58324	1.67923	0.765814	0.322539	0.099345	0.133504	0.069596		186.6	3.4399	2.85022	1.77968	0.811058	0.348514	0.124106	0.066535		186.6	3.17119	2.32799	1.53156	0.851527	0.380638	0.212622	0.091676
	186.8	2.58415	1.68074	0.767013	0.323214	0.1	0.13364	0.070461		186.8	3.44099	2.85151	1.78105	0.812269	0.349453	0.124321	0.067053		186.8	3.17187	2.32846	1.53179	0.851418	0.381186	0.212473	0.091556
	187	2.58482	1.68225	0.767769	0.323463	0.100837	0.133484	0.070799		187	3.44192	2.85258	1.78183	0.813289	0.350344	0.124371	0.067774		187	3.17316	2.3292	1.53193	0.851845	0.381704	0.213088	0.091693
	187.2	2.5856	1.68305	0.768049	0.323462	0.101075	0.132891	0.070889		187.2	3.44311	2.85352	1.78285	0.814356	0.350905	0.124334	0.067976		187.2	3.17434	2.33027	1.53262	0.853005	0.382624	0.214109	0.092336
	187.4	2.5867	1.68393	0.768321	0.323607	0.101018	0.133185	0.071046		187.4	3.44401	2.85458	1.78405	0.814928	0.351086	0.125159	0.068385		187.4	3.17511	2.33059	1.53288	0.853298	0.382685	0.213782	0.092468
	187.6	2.58763	1.68485	0.769475	0.324087	0.101435	0.133034	0.071755		187.6	3.44422	2.85546	1.78489	0.81571	0.351344	0.125408	0.068024		187.6	3.17655	2.33137	1.53373	0.854309	0.383177	0.214646	0.093118
	187.8	2.58838	1.68574	0.769879	0.323806	0.101589	0.13277	0.071775		187.8	3.44454	2.85677	1.78583	0.816012	0.351393	0.125368	0.067784		187.8	3.17725	2.33189	1.53405	0.855098	0.383561	0.214757	0.093233
	188	2.58887	1.68601	0.770028	0.323484	0.101007	0.132417	0.071096		188	3.44523	2.85764	1.7872	0.81683	0.352086	0.125475	0.068272		188	3.17739	2.3323	1.53424	0.855127	0.383137	0.214043	0.092697
	188.2	2.58902	1.6864	0.770004	0.323169	0.100194	0.131898	0.070757		188.2	3.44624	2.85903	1.78829	0.817651	0.35225	0.125498	0.068471		188.2	3.17776	2.33237	1.53424	0.855824	0.38284	0.213836	0.093355
	188.4	2.58921	1.68691	0.77039	0.323366	0.09951	0.131433	0.070325		188.4	3.44713	2.86054	1.78996	0.818759	0.352746	0.126135	0.068857		188.4	3.17808	2.33292	1.53466	0.855944	0.382652	0.213496	0.093315
	188.6	2.59038	1.68784	0.771276	0.323821	0.09936	0.131807	0.070684		188.6	3.44777	2.86159	1.79084	0.819754	0.353704	0.12653	0.069183		188.6	3.17876	2.33382	1.53498	0.856508	0.382795	0.213647	0.093107
	188.8	2.591	1.6884	0.771614	0.324153	0.099218	0.131978	0.070182		188.8	3.4491	2.86233	1.79221	0.820807	0.353971	0.127175	0.06923		188.8	3.17965	2.3344	1.53548	0.857548	0.382785	0.21371	0.093348
	189	2.5924	1.68933	0.772831	0.324758	0.099561	0.132918	0.070388		189	3.45022	2.86339	1.79341	0.821296	0.353802	0.12733	0.06925		189	3.17993	2.33449	1.53609	0.858236	0.382687	0.213463	0.093471
	189.2	2.59342	1.69038	0.774018	0.32519	0.099653	0.133443	0.070389		189.2	3.4503	2.86371	1.79452	0.822017	0.353815	0.127724	0.068923		189.2	3.1805	2.33522	1.53687	0.858407	0.382805	0.213199	0.093837
	189.4	2.59456	1.69158	0.77518	0.325566	0.100631	0.134202	0.070647		189.4	3.45073	2.86468	1.79554	0.822601	0.353982	0.128008	0.068822		189.4	3.18154	2.33603	1.53776	0.858805	0.38322	0.213764	0.094289
	189.6	2.59531	1.69275	0.775602	0.326032	0.100921	0.134619	0.071059		189.6	3.45122	2.86515	1.79748	0.823072	0.354158	0.128505	0.068396		189.6	3.18218	2.33651	1.53843	0.859296	0.382998	0.21396	0.094422
	189.8	2.59598	1.69341	0.775782	0.326149	0.100919	0.134131	0.070906		189.8	3.4514	2.86539	1.79853	0.823601	0.354517	0.128393	0.068262		189.8	3.18292	2.33676	1.53907	0.859328	0.382835	0.214051	0.094613
	190	2.59674	1.69379	0.776237	0.326497	0.100888	0.134019	0.070768		190	3.45171	2.86594	1.7998	0.824243	0.35455	0.128662	0.067939		190	3.18335	2.33691	1.53969	0.859034	0.382708	0.213862	0.094239
	190.2	2.5973	1.6949	0.776645	0.326905	0.101318	0.134635	0.070918		190.2	3.45208	2.86592	1.80109	0.825018	0.355	0.128654	0.06791		190.2	3.18396	2.3375	1.54046	0.85922	0.382857	0.21411	0.093888
	190.4	2.59759	1.69625	0.77742	0.326967	0.100906	0.134012	0.070644		190.4	3.45232	2.86711	1.80219	0.825574	0.355479	0.128605	0.068524		190.4	3.18454	2.338	1.54082	0.859685	0.383304	0.213681	0.093826
	190.6	2.59759	1.69709	0.778122	0.327303	0.101302	0.133939	0.070605		190.6	3.45267	2.8675	1.80314	0.825836	0.355709	0.128673	0.068632		190.6	3.18488	2.33802	1.5411	0.859522	0.38322	0.213609	0.093611
	190.8	2.59782	1.69772	0.778199	0.327366	0.101609	0.133804	0.070364		190.8	3.45316	2.86866	1.80407	0.826648	0.356541	0.128438	0.069222		190.8	3.1854	2.3384	1.54124	0.859027	0.383347	0.213537	0.093128
	191	2.59804	1.69836	0.778578	0.327391	0.101915	0.133692	0.070243		191	3.45355	2.86905	1.80482	0.826741	0.356366	0.127804	0.068671		191	3.18595	2.33897	1.54063	0.858962	0.38295	0.213531	0.092591
	191.2	2.59908	1.69923	0.778842	0.327679	0.101759	0.133912	0.069921		191.2	3.45379	2.86998	1.80567	0.827422	0.356466	0.127681	0.068236		191.2	3.18679	2.34003	1.54072	0.859158	0.383119	0.214101	0.092593
	191.4	2.59967	1.70007	0.779313	0.328021	0.101811	0.133697	0.069818		191.4	3.45432	2.87108	1.80625	0.827897	0.356428	0.127876	0.067995		191.4	3.18703	2.34063	1.54078	0.858719	0.382543	0.214337	0.091824
	191.6	2.60028	1.70111	0.780327	0.328103	0.101845	0.133784	0.069956		191.6	3.4543	2.87196	1.80757	0.827991	0.356315	0.127285	0.067369		191.6	3.18762	2.34145	1.5414	0.858895	0.382545	0.214835	0.091381
	191.8	2.60075	1.70222	0.780906	0.32826	0.101992	0.134206	0.069845		191.8	3.45471	2.87303	1.80831	0.828638	0.356734	0.126917	0.066978		191.8	3.18738	2.34173	1.541	0.858884	0.38251	0.214585	0.091105
	192	2.60133	1.70316	0.781936	0.328645	0.10181	0.133854	0.069688		192	3.45526	2.87345	1.80896	0.829292	0.357237	0.126595	0.067026		192	3.1875	2.34231	1.54128	0.8585	0.382236	0.213811	0.090529
	192.2	2.60194	1.70421	0.782963	0.329368	0.101653	0.134038	0.069586		192.2	3.45599	2.87441	1.81002	0.830507	0.35785	0.127032	0.066947		192.2	3.18779	2.34315	1.54151	0.858854	0.382411	0.214498	0.090789
	192.4	2.60249	1.70525	0.784018	0.329946	0.101993	0.134018	0.070038		192.4	3.45714	2.87541	1.81124	0.832002	0.359235	0.128106	0.067959		192.4	3.18833	2.34398	1.54189	0.858789	0.382821	0.214621	0.090719
	192.6	2.60385	1.70696	0.785337	0.330512	0.102476	0.134702	0.070832		192.6	3.45841	2.87587	1.81275	0.833166	0.359662	0.128245	0.067927		192.6	3.19024	2.3454	1.5428	0.860084	0.383521	0.215156	0.091443
	192.8	2.60486	1.70775	0.786399	0.330657	0.102478	0.134644	0.070581		192.8	3.45942	2.87678	1.81362	0.833902	0.359923	0.128593	0.068036		192.8	3.19168	2.34628	1.54369	0.861387	0.384671	0.215837	0.092878
	193	2.60607	1.70873	0.787804	0.331278	0.102905	0.135297	0.070967		193	3.45983	2.87743	1.81404	0.83391	0.36027	0.128392	0.067984		193	3.19272	2.34684	1.54486	0.862306	0.385096	0.216034	0.093399
	193.2	2.60656	1.70992	0.788476	0.331563	0.10277	0.135328	0.070597		193.2	3.46051	2.87801	1.815	0.834323	0.360435	0.128674	0.06792		193.2	3.19394	2.34799	1.54592	0.863041	0.386185	0.216276	0.094394
	193.4	2.60755	1.71104	0.789411	0.331896	0.103103	0.136042	0.070897		193.4	3.46143	2.87933	1.81648	0.835211	0.361099	0.129162	0.068239		193.4	3.19586	2.34896	1.5469	0.864438	0.38744	0.217407	0.095318
	193.6	2.60814	1.71206	0.789757	0.332187	0.102717	0.136287	0.07104		193.6	3.46165	2.87974	1.8172	0.835254	0.360577	0.129207	0.068463		193.6	3.19693	2.34958	1.54763	0.86516	0.388416	0.217603	0.095808
	193.8	2.60972	1.71295	0.79058	0.332858	0.10302	0.136479	0.070998		193.8	3.46225	2.88063	1.81819	0.835975	0.360846	0.129448	0.06861		193.8	3.19812	2.3496	1.54853	0.86571	0.388577	0.217367	0.095721
	194	2.61052	1.71379	0.791599	0.33351	0.103127	0.136862	0.07121		194	3.46326	2.8815	1.81888	0.836979	0.361382	0.130019	0.068862		194	3.19936	2.35063	1.54912	0.866565	0.389457	0.217302	0.09632
	194.2	2.61147	1.71513	0.791914	0.333843	0.103209	0.136768	0.070918		194.2	3.46369	2.88204	1.82012	0.837132	0.361492	0.130135	0.068806		194.2	3.1998	2.35108	1.54929	0.867142	0.389719	0.217066	0.096695
	194.4	2.61234	1.71625	0.792528	0.333922	0.103147	0.136621	0.070365		194.4	3.4643	2.8836	1.82151	0.837766	0.36188	0.130654	0.068714		194.4	3.20011	2.3514	1.54883	0.867777	0.389723	0.216371	0.096546
	194.6	2.61337	1.71696	0.793243	0.334053	0.103477	0.137138	0.070258		194.6	3.46474	2.88396	1.82169	0.838072	0.361776	0.129893	0.068384		194.6	3.20053	2.35148	1.54888	0.867323	0.389353	0.216117	0.096434
	194.8	2.61368	1.71755	0.792926	0.333865	0.102896	0.136675	0.069689		194.8	3.46557	2.88464	1.823	0.839016	0.361901	0.129629	0.068471		194.8	3.20071	2.35147	1.54773	0.867262	0.388876	0.215523	0.095811
	195	2.61456	1.71868	0.793395	0.334207	0.103065	0.136737	0.069888		195	3.46666	2.88566	1.82442	0.83965	0.361786	0.130013	0.068234		195	3.20099	2.35212	1.54751	0.867513	0.388537	0.215405	0.095667
	195.2	2.6156	1.7195	0.793713	0.334455	0.102687	0.136804	0.069937		195.2	3.468	2.88684	1.82529	0.840866	0.362491	0.130511	0.069066		195.2	3.20139	2.35258	1.54829	0.867794	0.388306	0.215856	0.095611
	195.4	2.6162	1.72072	0.794381	0.334983	0.103121	0.136767	0.070192		195.4	3.46863	2.88794	1.82679	0.841321	0.362984	0.130715	0.069116		195.4	3.20174	2.35246	1.54854	0.868082	0.388265	0.215915	0.095265
	195.6	2.61707	1.72155	0.794862	0.335377	0.103483	0.137406	0.070794		195.6	3.4699	2.88896	1.82798	0.842287	0.363799	0.130947	0.069134		195.6	3.20206	2.35321	1.54949	0.868389	0.38821	0.215605	0.094867
	195.8	2.61743	1.72262	0.795715	0.335394	0.10352	0.136989	0.071009		195.8	3.47026	2.88962	1.82831	0.843183	0.364663	0.130849	0.068927		195.8	3.20158	2.35304	1.54902	0.867771	0.387506	0.21494	0.094704
	196	2.61818	1.72335	0.796485	0.335768	0.103505	0.136227	0.070899		196	3.47046	2.89011	1.82943	0.844131	0.365363	0.131081	0.06949		196	3.20205	2.35373	1.54958	0.867778	0.387641	0.214987	0.0944
	196.2	2.61868	1.7241	0.797066	0.336246	0.10334	0.136018	0.071506		196.2	3.47134	2.89119	1.83136	0.845472	0.36615	0.131398	0.069927		196.2	3.2024	2.35394	1.5499	0.867847	0.387321	0.214796	0.094197
	196.4	2.6194	1.72515	0.797971	0.336844	0.103856	0.13586	0.072055		196.4	3.47197	2.89238	1.83291	0.846704	0.36704	0.131846	0.070713		196.4	3.20268	2.35416	1.55026	0.867811	0.387395	0.214565	0.094282
	196.6	2.61998	1.72592	0.798834	0.33678	0.10347	0.135823	0.071316		196.6	3.47285	2.89302	1.83447	0.847689	0.367733	0.131983	0.070907		196.6	3.20375	2.35509	1.55134	0.869033	0.387912	0.215079	0.095031
	196.8	2.62036	1.72597	0.799534	0.336595	0.103606	0.135123	0.071389		196.8	3.47345	2.89431	1.83521	0.848313	0.368249	0.132268	0.07145		196.8	3.20477	2.35564	1.552	0.869822	0.388383	0.215591	0.095597
	197	2.62047	1.72674	0.799974	0.336669	0.103662	0.135185	0.071111		197	3.47413	2.89549	1.83724	0.849242	0.368819	0.132482	0.071815		197	3.20565	2.35606	1.55266	0.870468	0.388391	0.215896	0.095731
	197.2	2.62141	1.72846	0.801373	0.337618	0.104541	0.135923	0.071831		197.2	3.47496	2.89681	1.8387	0.850274	0.369031	0.132585	0.071975		197.2	3.20639	2.35713	1.55276	0.870741	0.388959	0.216221	0.095921
	197.4	2.62238	1.72944	0.802442	0.338089	0.10496	0.136439	0.072444		197.4	3.4758	2.89778	1.83984	0.851456	0.369211	0.132694	0.072445		197.4	3.20783	2.35805	1.55356	0.871707	0.389351	0.217	0.0964
	197.6	2.62342	1.73051	0.803563	0.338572	0.10531	0.136444	0.072163		197.6	3.47613	2.89822	1.84062	0.852484	0.369048	0.132535	0.072761		197.6	3.20848	2.35857	1.55387	0.871985	0.389689	0.217203	0.096917
	197.8	2.62461	1.73117	0.80431	0.339268	0.10579	0.136255	0.072221		197.8	3.47717	2.89906	1.84175	0.852989	0.369707	0.132645	0.072501		197.8	3.20909	2.35941	1.55398	0.872051	0.389693	0.217193	0.09677
	198	2.6254	1.73255	0.805026	0.339404	0.105986	0.135845	0.072387		198	3.47828	2.89986	1.84294	0.853968	0.369735	0.132757	0.072952		198	3.20941	2.35982	1.55366	0.872007	0.389878	0.217233	0.096604
	198.2	2.62622	1.73386	0.805207	0.339504	0.106158	0.135984	0.072118		198.2	3.47829	2.90056	1.84373	0.854067	0.369582	0.132304	0.072774		198.2	3.21008	2.3606	1.55338	0.871988	0.390289	0.217307	0.096395
	198.4	2.62715	1.73511	0.805994	0.339762	0.10673	0.136307	0.072433		198.4	3.47887	2.90138	1.84387	0.854241	0.37003	0.132273	0.072682		198.4	3.2109	2.36103	1.55365	0.872019	0.390474	0.217373	0.09649
	198.6	2.62859	1.73662	0.80689	0.340442	0.10691	0.136607	0.072918		198.6	3.47957	2.90208	1.84498	0.855031	0.370329	0.13208	0.073152		198.6	3.21192	2.36137	1.55463	0.872125	0.390149	0.217787	0.096836
	198.8	2.62887	1.73796	0.80712	0.340746	0.107144	0.1361	0.07301		198.8	3.48034	2.90307	1.84602	0.855894	0.370714	0.132395	0.073239		198.8	3.21266	2.36239	1.55523	0.872243	0.390449	0.218478	0.097033
	199	2.62949	1.73936	0.807455	0.340886	0.107343	0.136174	0.073386		199	3.48088	2.90388	1.84668	0.855934	0.370497	0.132535	0.073499		199	3.21355	2.36288	1.5562	0.872508	0.390981	0.219274	0.09721
	199.2	2.6299	1.73989	0.808161	0.341028	0.107156	0.136302	0.073323		199.2	3.48108	2.90456	1.84756	0.856651	0.370905	0.132962	0.073503		199.2	3.21412	2.36303	1.55731	0.87248	0.390924	0.219405	0.097098
	199.4	2.63063	1.7412	0.808897	0.341816	0.107793	0.136524	0.074023		199.4	3.4811	2.90533	1.84801	0.857403	0.370973	0.132977	0.072661		199.4	3.21499	2.36341	1.55803	0.872514	0.390816	0.219539	0.096758
	199.6	2.63106	1.742	0.809397	0.341955	0.108247	0.136488	0.074241		199.6	3.48119	2.90595	1.84856	0.857807	0.371161	0.133111	0.07259		199.6	3.21525	2.3647	1.55887	0.872664	0.390577	0.219694	0.096433
	199.8	2.63131	1.74297	0.810258	0.341935	0.107893	0.136009	0.073774		199.8	3.48109	2.90685	1.84986	0.858398	0.371973	0.133468	0.072628		199.8	3.21578	2.36476	1.55872	0.87221	0.390453	0.219488	0.09594
	200	2.63152	1.74341	0.810666	0.342278	0.107533	0.136077	0.073287		200	3.48114	2.90727	1.85077	0.859045	0.371728	0.133492	0.072301		200	3.21676	2.36562	1.55941	0.872753	0.39091	0.220084	0.095714
	200.2	2.63214	1.7443	0.811539	0.342732	0.107579	0.136248	0.073307		200.2	3.48153	2.90856	1.85224	0.859693	0.371932	0.133895	0.071745		200.2	3.21707	2.36577	1.55967	0.87264	0.390367	0.219859	0.095399
	200.4	2.6325	1.74451	0.812296	0.342912	0.107212	0.136359	0.072793		200.4	3.48215	2.90959	1.85352	0.860323	0.372343	0.134527	0.071546		200.4	3.21758	2.36645	1.56073	0.873017	0.390552	0.220397	0.095835
	200.6	2.6321	1.74429	0.81253	0.342149	0.106426	0.135932	0.072098		200.6	3.48275	2.91036	1.85483	0.860501	0.372492	0.134927	0.071444		200.6	3.21831	2.36722	1.56121	0.873651	0.390478	0.220727	0.096198
	200.8	2.63258	1.74503	0.813396	0.341991	0.106542	0.135916	0.072387		200.8	3.48299	2.91144	1.85608	0.861175	0.372545	0.135042	0.071253		200.8	3.21915	2.36749	1.56133	0.874119	0.391098	0.220762	0.096317
	201	2.63302	1.74614	0.81423	0.342164	0.106092	0.136333	0.072056		201	3.48346	2.91227	1.85766	0.862091	0.373044	0.135458	0.071295		201	3.21962	2.36827	1.56146	0.874433	0.391063	0.220915	0.096186
	201.2	2.63369	1.74719	0.81518	0.342995	0.106042	0.137024	0.07239		201.2	3.48427	2.91288	1.85849	0.863075	0.373178	0.135588	0.071198		201.2	3.2197	2.36902	1.56116	0.874602	0.391253	0.220552	0.096083
	201.4	2.63401	1.74738	0.814991	0.342858	0.105593	0.136503	0.071838		201.4	3.48547	2.91376	1.85946	0.864201	0.373913	0.136057	0.071898		201.4	3.22047	2.36969	1.56185	0.875456	0.391617	0.220577	0.096699
	201.6	2.63467	1.74826	0.815338	0.342785	0.105168	0.136436	0.07159		201.6	3.48607	2.91451	1.86013	0.865064	0.373507	0.135978	0.071626		201.6	3.22002	2.36969	1.56125	0.875387	0.391771	0.22035	0.09618
	201.8	2.63583	1.74925	0.815802	0.343278	0.105008	0.136546	0.071366		201.8	3.48676	2.91536	1.86076	0.865247	0.373744	0.1361	0.071383		201.8	3.22088	2.37073	1.56163	0.875185	0.392155	0.220179	0.095929
	202	2.63635	1.75041	0.816567	0.343846	0.105205	0.136931	0.071613		202	3.48719	2.91625	1.86147	0.86608	0.374143	0.135873	0.071419		202	3.22144	2.3712	1.5624	0.875343	0.392522	0.220209	0.096116
	202.2	2.63695	1.75157	0.816952	0.344377	0.104954	0.137482	0.071945		202.2	3.48755	2.9173	1.86162	0.866391	0.374716	0.135576	0.071098		202.2	3.22226	2.37196	1.56324	0.875535	0.393181	0.220152	0.096531
	202.4	2.63844	1.7525	0.818043	0.34492	0.105369	0.137618	0.072142		202.4	3.48868	2.91847	1.86297	0.86735	0.376089	0.136157	0.071475		202.4	3.22344	2.37283	1.56472	0.876091	0.393871	0.220592	0.09761
	202.6	2.63944	1.75368	0.818954	0.345554	0.105473	0.137666	0.072213		202.6	3.48919	2.91947	1.86435	0.869007	0.376598	0.136135	0.07166		202.6	3.22396	2.37332	1.56533	0.87654	0.394027	0.220633	0.097458
	202.8	2.63992	1.75429	0.819297	0.345652	0.105087	0.137102	0.072049		202.8	3.48994	2.92022	1.86512	0.869698	0.376595	0.135869	0.071284		202.8	3.22431	2.37385	1.56549	0.876162	0.394122	0.220405	0.097152
	203	2.64073	1.75543	0.819688	0.346386	0.105048	0.137126	0.071962		203	3.49082	2.92092	1.8667	0.870539	0.377455	0.135889	0.072008		203	3.22487	2.37384	1.56551	0.87667	0.394316	0.220422	0.096991
	203.2	2.64169	1.75651	0.820843	0.34731	0.105698	0.137826	0.072631		203.2	3.49131	2.92157	1.86728	0.871889	0.377971	0.135914	0.07213		203.2	3.22511	2.37448	1.56607	0.877108	0.394142	0.220209	0.096828
	203.4	2.64276	1.75765	0.821766	0.348364	0.106829	0.138186	0.0731		203.4	3.49214	2.92238	1.86881	0.872868	0.378485	0.135852	0.072231		203.4	3.22597	2.37558	1.56659	0.877502	0.394335	0.220445	0.097046
	203.6	2.64294	1.75828	0.822508	0.348567	0.107171	0.138069	0.072719		203.6	3.49246	2.92348	1.87057	0.873361	0.379363	0.136074	0.073027		203.6	3.22662	2.37635	1.56628	0.878001	0.394707	0.220446	0.097215
	203.8	2.64363	1.75903	0.822901	0.348617	0.107257	0.138086	0.072384		203.8	3.49343	2.92472	1.87196	0.874294	0.380021	0.136234	0.072818		203.8	3.22726	2.37667	1.566	0.878085	0.394639	0.220053	0.096817
	204	2.64443	1.75976	0.823913	0.349075	0.108099	0.138359	0.072819		204	3.49396	2.92559	1.87338	0.874899	0.379931	0.136328	0.072883		204	3.22784	2.37695	1.56584	0.878437	0.394377	0.219742	0.096479
	204.2	2.64572	1.76061	0.824949	0.349015	0.108308	0.138295	0.073233		204.2	3.49471	2.92666	1.87446	0.875308	0.380684	0.136605	0.073251		204.2	3.2283	2.37728	1.56585	0.878535	0.394004	0.219638	0.096721
	204.4	2.64653	1.76159	0.825306	0.348995	0.10856	0.138606	0.073879		204.4	3.49561	2.92768	1.87553	0.875476	0.381005	0.136322	0.073548		204.4	3.22883	2.37784	1.56628	0.87907	0.393847	0.219262	0.096707
	204.6	2.64754	1.76274	0.826112	0.34877	0.108952	0.138954	0.074196		204.6	3.49594	2.92838	1.87689	0.875788	0.381194	0.136709	0.074208		204.6	3.22953	2.37817	1.56604	0.879383	0.394033	0.219526	0.096573
	204.8	2.64882	1.76417	0.826798	0.349042	0.109123	0.139535	0.074847		204.8	3.49676	2.92956	1.8778	0.876748	0.381695	0.13688	0.074312		204.8	3.23069	2.37848	1.56591	0.880107	0.394447	0.219686	0.096687
	205	2.64975	1.76524	0.826831	0.349228	0.109142	0.139549	0.075176		205	3.49797	2.93027	1.87938	0.877469	0.381862	0.13799	0.074537		205	3.23102	2.37884	1.56583	0.88001	0.393658	0.219694	0.096357
	205.2	2.65025	1.76555	0.826794	0.349112	0.108742	0.139317	0.075419		205.2	3.49866	2.93092	1.88029	0.877927	0.38188	0.138618	0.074846		205.2	3.2314	2.37951	1.56594	0.880341	0.393874	0.219492	0.096394
	205.4	2.65111	1.76662	0.827527	0.349335	0.108812	0.139016	0.075766		205.4	3.49894	2.93138	1.88053	0.878042	0.381525	0.13878	0.07494		205.4	3.23236	2.38067	1.56676	0.880918	0.394479	0.219978	0.096913
	205.6	2.65194	1.76798	0.828108	0.349648	0.108845	0.139271	0.07584		205.6	3.49933	2.93148	1.88063	0.87801	0.380944	0.138798	0.07376		205.6	3.23277	2.38083	1.56744	0.88138	0.394557	0.220514	0.096341
	205.8	2.65244	1.76888	0.829119	0.35024	0.108784	0.139289	0.075684		205.8	3.49993	2.93161	1.88124	0.878073	0.3814	0.138875	0.073327		205.8	3.23447	2.382	1.56886	0.881913	0.395168	0.221115	0.096992
	206	2.65275	1.77007	0.830228	0.350732	0.108662	0.139015	0.07582		206	3.50054	2.93211	1.88167	0.878456	0.381502	0.138838	0.073328		206	3.2349	2.38255	1.56943	0.88192	0.395406	0.221125	0.096971
	206.2	2.65395	1.77137	0.831728	0.351186	0.108973	0.139576	0.076307		206.2	3.5012	2.93297	1.88292	0.879387	0.381845	0.139153	0.073565		206.2	3.23629	2.38325	1.57036	0.882539	0.396108	0.221645	0.096985
	206.4	2.65456	1.77153	0.832761	0.351161	0.108996	0.139182	0.075552		206.4	3.50206	2.93339	1.88368	0.880402	0.382446	0.139216	0.073799		206.4	3.23713	2.38449	1.57125	0.883092	0.396957	0.222175	0.097283
	206.6	2.65423	1.77224	0.833485	0.351668	0.108624	0.138819	0.074987		206.6	3.50246	2.93368	1.8842	0.881113	0.382184	0.138632	0.073163		206.6	3.23754	2.38531	1.57172	0.883217	0.397176	0.222676	0.097263
	206.8	2.65486	1.77311	0.834244	0.352504	0.108648	0.139019	0.074839		206.8	3.50367	2.93468	1.88577	0.882215	0.382939	0.139144	0.073666		206.8	3.23833	2.38601	1.57271	0.883286	0.397317	0.223009	0.097425
	207	2.65509	1.77387	0.834923	0.353055	0.108906	0.139598	0.074722		207	3.50373	2.93526	1.88664	0.882749	0.383319	0.138677	0.073754		207	3.23946	2.38689	1.57378	0.884352	0.398218	0.223677	0.097778
	207.2	2.65618	1.77502	0.83672	0.354054	0.110061	0.14098	0.074876		207.2	3.50366	2.93541	1.88706	0.883421	0.383085	0.138185	0.073511		207.2	3.24	2.38768	1.57421	0.884374	0.398113	0.223892	0.097802
	207.4	2.65652	1.77531	0.837286	0.354258	0.110124	0.140828	0.073942		207.4	3.504	2.93649	1.88882	0.88424	0.383511	0.138012	0.073486		207.4	3.2403	2.38848	1.5744	0.884273	0.398182	0.22376	0.097711
	207.6	2.65592	1.77533	0.837204	0.353949	0.109881	0.139987	0.073277		207.6	3.50429	2.93729	1.88936	0.885269	0.383806	0.137885	0.073269		207.6	3.24119	2.38855	1.57444	0.884613	0.397938	0.223199	0.097702
	207.8	2.65674	1.77652	0.837878	0.354407	0.110639	0.140024	0.072954		207.8	3.50515	2.93831	1.89057	0.886278	0.384553	0.13822	0.073329		207.8	3.24185	2.38929	1.575	0.885024	0.397999	0.223371	0.097748
	208	2.65728	1.77747	0.838752	0.354537	0.111029	0.140083	0.073401		208	3.50575	2.93902	1.89167	0.887185	0.385205	0.138031	0.073775		208	3.24303	2.39005	1.57605	0.885595	0.398615	0.223404	0.098348
	208.2	2.65832	1.77866	0.839249	0.354813	0.111443	0.140118	0.073681		208.2	3.506	2.93953	1.89193	0.887663	0.385297	0.137797	0.073269		208.2	3.24391	2.39036	1.57642	0.885707	0.398491	0.223739	0.099041
	208.4	2.65875	1.77927	0.838959	0.355073	0.111676	0.140196	0.07369		208.4	3.50647	2.94095	1.89336	0.888507	0.3859	0.138295	0.073784		208.4	3.24476	2.39069	1.57648	0.886114	0.398578	0.223583	0.098977
	208.6	2.65948	1.78049	0.839386	0.355294	0.111882	0.140202	0.074282		208.6	3.50664	2.94149	1.89421	0.889412	0.386344	0.138885	0.073809		208.6	3.24577	2.39052	1.57673	0.885836	0.39821	0.223643	0.099211
	208.8	2.65987	1.78123	0.839421	0.355019	0.111489	0.139948	0.074325		208.8	3.5073	2.94257	1.89554	0.890623	0.386656	0.139346	0.07341		208.8	3.24649	2.39103	1.57635	0.885489	0.39791	0.223031	0.099342
	209	2.66036	1.78182	0.840009	0.35497	0.110901	0.139151	0.073984		209	3.5078	2.94305	1.89682	0.891253	0.386777	0.13998	0.073425		209	3.24665	2.39134	1.57647	0.885146	0.398034	0.222849	0.099156
	209.2	2.661	1.78264	0.840497	0.35485	0.110618	0.138913	0.073992		209.2	3.50778	2.94362	1.897	0.891364	0.386734	0.139607	0.073273		209.2	3.24761	2.39214	1.57678	0.885439	0.398717	0.222463	0.099187
	209.4	2.66194	1.78427	0.841379	0.35556	0.111152	0.139456	0.074297		209.4	3.50855	2.94448	1.89805	0.892299	0.386377	0.139914	0.072808		209.4	3.24813	2.39222	1.57715	0.885293	0.398251	0.222191	0.099288
	209.6	2.66296	1.78532	0.842135	0.356101	0.111409	0.139388	0.074301		209.6	3.50914	2.94507	1.89867	0.893056	0.386437	0.140037	0.072574		209.6	3.24865	2.39196	1.57703	0.885627	0.398094	0.222005	0.098812
	209.8	2.66372	1.7865	0.843066	0.356487	0.111565	0.139284	0.074734		209.8	3.50994	2.94612	1.89963	0.893632	0.38708	0.139985	0.073119		209.8	3.24898	2.39249	1.57695	0.885393	0.398311	0.221765	0.098818
	210	2.66481	1.78723	0.844025	0.356853	0.111847	0.139376	0.074971		210	3.51032	2.94708	1.90098	0.8949	0.387122	0.140582	0.073336		210	3.24894	2.39315	1.57672	0.885247	0.398128	0.221249	0.098505
	210.2	2.66536	1.78775	0.845379	0.357137	0.112115	0.140072	0.075091		210.2	3.5111	2.9479	1.90244	0.895652	0.388106	0.141045	0.074128		210.2	3.24956	2.39406	1.57737	0.885917	0.39867	0.221805	0.098629
	210.4	2.66605	1.78872	0.846181	0.35788	0.112331	0.14004	0.07464		210.4	3.51181	2.94836	1.90335	0.895853	0.388287	0.14087	0.074126		210.4	3.24916	2.3944	1.57706	0.88572	0.398499	0.221342	0.098211
	210.6	2.66671	1.78974	0.8471	0.358375	0.112432	0.140478	0.074567		210.6	3.51245	2.94966	1.90519	0.896149	0.388708	0.140887	0.074246		210.6	3.24956	2.39536	1.57754	0.886116	0.398767	0.221702	0.098188
	210.8	2.66746	1.79063	0.847796	0.358881	0.112418	0.140889	0.074651		210.8	3.51341	2.95077	1.9063	0.896816	0.389346	0.141519	0.075197		210.8	3.24956	2.39533	1.57787	0.886108	0.398833	0.221683	0.09749
	211	2.66818	1.79137	0.8486	0.358974	0.112593	0.141734	0.074505		211	3.51323	2.95118	1.90706	0.896387	0.389005	0.14041	0.074761		211	3.24987	2.39551	1.5777	0.886508	0.398753	0.2219	0.097053
	211.2	2.66897	1.79276	0.850071	0.359595	0.113218	0.142081	0.074275		211.2	3.51383	2.95149	1.90819	0.89696	0.389533	0.140447	0.074979		211.2	3.24984	2.39601	1.57742	0.886315	0.398046	0.222189	0.096401
	211.4	2.66912	1.79324	0.85031	0.35966	0.112487	0.141497	0.073788		211.4	3.51481	2.95225	1.90936	0.897553	0.390097	0.140629	0.075081		211.4	3.25001	2.3968	1.57779	0.886842	0.39801	0.222401	0.095901
	211.6	2.66914	1.79377	0.850508	0.360086	0.112549	0.14117	0.073338		211.6	3.516	2.95336	1.91104	0.898457	0.391044	0.141246	0.075039		211.6	3.25115	2.39757	1.57919	0.887757	0.398396	0.222689	0.096148
	211.8	2.67003	1.79483	0.851432	0.36046	0.112463	0.141556	0.07342		211.8	3.51654	2.95403	1.9121	0.898896	0.391707	0.141518	0.075312		211.8	3.25169	2.39871	1.58009	0.888336	0.399237	0.223204	0.096335
	212	2.67071	1.79562	0.851383	0.360507	0.112527	0.141366	0.073771		212	3.51718	2.955	1.91325	0.89926	0.39222	0.14139	0.075779		212	3.25254	2.3994	1.58083	0.889082	0.400017	0.223145	0.096475
	212.2	2.67186	1.79675	0.852112	0.361237	0.112962	0.141514	0.074155		212.2	3.51778	2.95605	1.9146	0.899807	0.392866	0.142094	0.075903		212.2	3.25293	2.39986	1.58095	0.889427	0.399787	0.223134	0.09656
	212.4	2.67187	1.79718	0.851999	0.360864	0.112196	0.141286	0.074057		212.4	3.51881	2.95686	1.91607	0.900971	0.3939	0.142783	0.076396		212.4	3.25324	2.40035	1.58138	0.889533	0.399962	0.22283	0.096109
	212.6	2.67291	1.79861	0.853154	0.361249	0.112171	0.140908	0.074146		212.6	3.51965	2.9576	1.91696	0.901602	0.393914	0.14279	0.07608		212.6	3.25427	2.40087	1.58254	0.889551	0.39996	0.223032	0.096484
	212.8	2.67401	1.79927	0.85375	0.361468	0.112224	0.141171	0.07391		212.8	3.52041	2.95839	1.91834	0.903152	0.394237	0.143162	0.076084		212.8	3.25498	2.40134	1.58352	0.88981	0.4004	0.223051	0.096366
	213	2.67492	1.80072	0.854561	0.362189	0.112513	0.141177	0.074199		213	3.52144	2.9591	1.91933	0.904155	0.39413	0.142866	0.076114		213	3.25577	2.40176	1.58466	0.890095	0.400911	0.223285	0.096934
	213.2	2.67584	1.80191	0.855077	0.362462	0.113333	0.141855	0.07448		213.2	3.52238	2.96033	1.92052	0.905266	0.394598	0.143152	0.0764		213.2	3.25655	2.40207	1.585	0.889837	0.400351	0.222928	0.096729
	213.4	2.67682	1.80281	0.855768	0.363266	0.114078	0.142438	0.074763		213.4	3.52364	2.96092	1.92174	0.906904	0.395024	0.143754	0.076578		213.4	3.25737	2.40223	1.58599	0.890041	0.40026	0.22338	0.097294
	213.6	2.67748	1.80328	0.856314	0.363498	0.114171	0.141743	0.074657		213.6	3.524	2.96172	1.92204	0.907493	0.395129	0.143667	0.076508		213.6	3.25879	2.40297	1.58647	0.890758	0.401231	0.223792	0.097891
	213.8	2.67813	1.80392	0.856849	0.363518	0.114328	0.142255	0.075218		213.8	3.52487	2.96273	1.92298	0.908196	0.396242	0.143842	0.076705		213.8	3.25921	2.40374	1.58725	0.891228	0.401076	0.224039	0.098669
	214	2.6785	1.80418	0.857201	0.363797	0.114333	0.14213	0.0749		214	3.5254	2.96353	1.92446	0.90936	0.39661	0.144508	0.076717		214	3.25989	2.40439	1.58765	0.891629	0.400814	0.223846	0.098938
	214.2	2.6792	1.80554	0.858376	0.364323	0.114568	0.14205	0.074988		214.2	3.52608	2.96432	1.92542	0.909587	0.39706	0.144697	0.076892		214.2	3.26099	2.40536	1.58847	0.892352	0.401393	0.224523	0.099373
	214.4	2.68016	1.80663	0.85926	0.365337	0.114948	0.142387	0.075521		214.4	3.52648	2.96523	1.92614	0.909875	0.397256	0.144391	0.076505		214.4	3.26109	2.40555	1.5886	0.892649	0.401335	0.224578	0.099462
	214.6	2.68047	1.8071	0.859377	0.364649	0.114416	0.142115	0.075498		214.6	3.52732	2.96577	1.92651	0.910312	0.39782	0.144309	0.076421		214.6	3.26154	2.40608	1.58938	0.892695	0.401332	0.224732	0.099636
	214.8	2.68037	1.80794	0.859953	0.364901	0.113989	0.141556	0.075212		214.8	3.52786	2.96618	1.92696	0.910924	0.397777	0.144502	0.076534		214.8	3.26225	2.40606	1.58939	0.892357	0.401087	0.225093	0.099655
	215	2.6811	1.80842	0.860723	0.364893	0.113965	0.141811	0.075265		215	3.52781	2.96704	1.92738	0.911473	0.397893	0.144079	0.076383		215	3.26318	2.40681	1.58951	0.893159	0.401179	0.225779	0.100231
	215.2	2.68195	1.80898	0.861557	0.365304	0.114156	0.141565	0.075273		215.2	3.52825	2.96775	1.92822	0.912554	0.397811	0.144643	0.076317		215.2	3.26415	2.40768	1.59022	0.893406	0.401233	0.225973	0.099918
	215.4	2.68279	1.80978	0.862262	0.365807	0.114299	0.141824	0.075277		215.4	3.5291	2.96876	1.92941	0.913284	0.398527	0.144991	0.07618		215.4	3.26442	2.40793	1.59045	0.893246	0.401472	0.225797	0.099827
	215.6	2.68335	1.81096	0.862769	0.365802	0.114437	0.14173	0.07531		215.6	3.52931	2.97006	1.93045	0.914259	0.399132	0.145097	0.076078		215.6	3.2646	2.40821	1.59073	0.893666	0.402153	0.225399	0.099907
	215.8	2.68429	1.81177	0.863437	0.366293	0.114553	0.142057	0.076032		215.8	3.52864	2.97031	1.93088	0.914673	0.398944	0.144773	0.075868		215.8	3.26456	2.40833	1.59047	0.893137	0.401928	0.224708	0.099485
	216	2.68545	1.81269	0.863697	0.36666	0.114939	0.141976	0.075942		216	3.52912	2.97128	1.93206	0.91555	0.399788	0.145058	0.076379		216	3.26451	2.40868	1.59055	0.893153	0.401828	0.224704	0.099025
	216.2	2.68588	1.81401	0.864171	0.366896	0.114734	0.141926	0.075701		216.2	3.5296	2.97163	1.93293	0.916196	0.400618	0.145189	0.076515		216.2	3.26491	2.40902	1.59069	0.893101	0.401981	0.224342	0.098821
	216.4	2.68634	1.81488	0.864208	0.366936	0.11467	0.141778	0.075276		216.4	3.53002	2.97204	1.9341	0.917072	0.40126	0.14566	0.076851		216.4	3.26533	2.40905	1.59093	0.892514	0.401897	0.223866	0.09783
	216.6	2.68786	1.81638	0.865553	0.368022	0.115483	0.141734	0.075318		216.6	3.53092	2.97315	1.9352	0.917812	0.401778	0.145931	0.07754		216.6	3.2667	2.40981	1.59146	0.892821	0.402399	0.224189	0.09809
	216.8	2.68874	1.81771	0.866034	0.368344	0.116126	0.142335	0.075557		216.8	3.53113	2.9731	1.93601	0.918651	0.402262	0.145967	0.078112		216.8	3.26713	2.41015	1.59186	0.893021	0.402723	0.224136	0.098005
	217	2.68899	1.81885	0.866641	0.368509	0.116637	0.142252	0.075742		217	3.5319	2.97369	1.93749	0.91883	0.40246	0.145591	0.078518		217	3.26843	2.41106	1.5922	0.893577	0.403292	0.224368	0.098327
	217.2	2.68988	1.81989	0.867762	0.36909	0.117159	0.142824	0.075733		217.2	3.53264	2.97442	1.93868	0.919473	0.403276	0.145749	0.078972		217.2	3.26933	2.41177	1.59215	0.894218	0.403298	0.224329	0.098353
	217.4	2.69077	1.82062	0.868318	0.369095	0.117406	0.143074	0.075796		217.4	3.53327	2.97477	1.93894	0.919739	0.403271	0.145443	0.079289		217.4	3.27039	2.41246	1.59286	0.895004	0.403656	0.224489	0.098835
	217.6	2.69113	1.82116	0.868902	0.369004	0.117235	0.142958	0.0756		217.6	3.53353	2.97592	1.93993	0.920319	0.403393	0.145325	0.078877		217.6	3.27115	2.41345	1.59304	0.895837	0.403791	0.224545	0.098577
	217.8	2.69175	1.82197	0.869628	0.369472	0.117116	0.143738	0.075826		217.8	3.53428	2.97695	1.94103	0.921122	0.404082	0.145526	0.079249		217.8	3.27153	2.41433	1.59273	0.896249	0.403629	0.224557	0.0986
	218	2.69231	1.82266	0.870192	0.369747	0.117191	0.143856	0.07555		218	3.53482	2.9775	1.94201	0.921613	0.404067	0.145611	0.079063		218	3.272	2.41523	1.59294	0.896873	0.404195	0.224908	0.098347
	218.2	2.69285	1.82284	0.871113	0.369742	0.11707	0.143802	0.075801		218.2	3.53539	2.97813	1.94233	0.922018	0.403663	0.145247	0.078742		218.2	3.27283	2.41654	1.59342	0.897782	0.404741	0.225789	0.098785
	218.4	2.69309	1.82303	0.87169	0.3699	0.11677	0.14368	0.07544		218.4	3.53583	2.97826	1.94238	0.922521	0.403623	0.144647	0.07847		218.4	3.27301	2.41721	1.59371	0.898095	0.405159	0.226064	0.099027
	218.6	2.6939	1.82355	0.87214	0.369555	0.116389	0.143504	0.075032		218.6	3.53652	2.97828	1.94334	0.92324	0.403662	0.144839	0.078087		218.6	3.27355	2.41767	1.59399	0.897885	0.405269	0.225945	0.099045
	218.8	2.69455	1.82427	0.872969	0.369942	0.116431	0.143273	0.075221		218.8	3.5369	2.97956	1.94449	0.924293	0.403192	0.144691	0.07799		218.8	3.27431	2.41857	1.59415	0.898574	0.405984	0.226609	0.099323
	219	2.6954	1.82471	0.874137	0.370356	0.116849	0.143838	0.07572		219	3.5375	2.98039	1.94492	0.924806	0.403013	0.14472	0.07771		219	3.27484	2.41955	1.59471	0.899036	0.40656	0.22737	0.099801
	219.2	2.69662	1.82565	0.875263	0.370908	0.117511	0.143998	0.076126		219.2	3.53787	2.98164	1.94627	0.925651	0.403247	0.145163	0.077127		219.2	3.27548	2.42008	1.59557	0.899098	0.406627	0.227197	0.100047
	219.4	2.69729	1.82687	0.876285	0.371409	0.117882	0.144636	0.076716		219.4	3.53841	2.98262	1.94699	0.926306	0.403841	0.145267	0.076604		219.4	3.2751	2.41998	1.59569	0.898467	0.406288	0.226803	0.100292
	219.6	2.69793	1.82781	0.877109	0.371794	0.117761	0.144872	0.076776		219.6	3.53845	2.98329	1.94774	0.927126	0.40362	0.144903	0.076144		219.6	3.27567	2.42042	1.59608	0.898438	0.406473	0.226521	0.100629
	219.8	2.69878	1.8282	0.87757	0.373006	0.118108	0.145283	0.077038		219.8	3.5388	2.98409	1.94858	0.928093	0.40445	0.145359	0.075929		219.8	3.2764	2.42047	1.5967	0.897845	0.405964	0.226407	0.100693
	220	2.69936	1.8288	0.877884	0.373182	0.118226	0.145299	0.077147		220	3.53959	2.98487	1.94931	0.928826	0.405086	0.145363	0.076091		220	3.2767	2.42071	1.59709	0.897577	0.405693	0.226306	0.100798
	220.2	2.6997	1.83003	0.878351	0.373925	0.118513	0.1453	0.076979		220.2	3.54086	2.98608	1.95105	0.929803	0.406256	0.146209	0.07664		220.2	3.27744	2.42053	1.59705	0.897672	0.405693	0.225856	0.100569
	220.4	2.70069	1.83093	0.878844	0.374532	0.118538	0.1457	0.077356		220.4	3.54213	2.98776	1.95298	0.930904	0.40764	0.147448	0.077602		220.4	3.27832	2.42093	1.59788	0.897845	0.405315	0.225664	0.100749
	220.6	2.70147	1.83185	0.879431	0.374627	0.118638	0.145486	0.07733		220.6	3.54327	2.98845	1.95405	0.931345	0.408275	0.147555	0.078275		220.6	3.2797	2.42141	1.59849	0.898409	0.40534	0.225964	0.101015
	220.8	2.70188	1.83254	0.879606	0.374384	0.118267	0.145343	0.077235		220.8	3.54343	2.98893	1.95532	0.931548	0.408915	0.147037	0.078452		220.8	3.28027	2.42141	1.59878	0.898595	0.405456	0.225685	0.100924
	221	2.70214	1.83307	0.879774	0.374516	0.118279	0.145196	0.0774		221	3.54456	2.99006	1.95679	0.932433	0.410168	0.147219	0.079043		221	3.28134	2.42172	1.59941	0.899008	0.405184	0.225397	0.100711
	221.2	2.703	1.83394	0.880105	0.374829	0.118126	0.145633	0.077437		221.2	3.54493	2.99057	1.95778	0.932836	0.41047	0.146836	0.079157		221.2	3.28178	2.4218	1.59918	0.899285	0.404901	0.224812	0.10058
	221.4	2.70306	1.83394	0.880041	0.373937	0.117481	0.145167	0.077037		221.4	3.54539	2.99159	1.95852	0.933465	0.410721	0.146714	0.079065		221.4	3.28234	2.42175	1.59956	0.899308	0.404894	0.224517	0.100183
	221.6	2.70247	1.83411	0.879907	0.373662	0.116714	0.144349	0.076807		221.6	3.54588	2.99252	1.95946	0.934318	0.411596	0.147016	0.079212		221.6	3.28264	2.422	1.59949	0.899743	0.404984	0.224541	0.099612
	221.8	2.70286	1.83465	0.880447	0.374115	0.116537	0.144093	0.076696		221.8	3.5465	2.99306	1.96024	0.935004	0.411757	0.147409	0.079243		221.8	3.28363	2.42272	1.59969	0.899976	0.405594	0.225096	0.100034
	222	2.70348	1.83474	0.880792	0.373702	0.116246	0.143923	0.076708		222	3.54668	2.99294	1.96056	0.935393	0.412078	0.147008	0.079064		222	3.28472	2.42369	1.60045	0.900784	0.406435	0.226087	0.100491
	222.2	2.70368	1.83481	0.881114	0.373847	0.115906	0.142847	0.076307		222.2	3.54678	2.99316	1.96116	0.935926	0.41192	0.147003	0.079196		222.2	3.28563	2.42442	1.60079	0.901089	0.406742	0.226497	0.10074
	222.4	2.70401	1.83556	0.881488	0.37417	0.115284	0.142172	0.0759		222.4	3.5471	2.99347	1.962	0.936617	0.411634	0.147471	0.078493		222.4	3.28649	2.42559	1.60126	0.901758	0.407252	0.226954	0.101053
	222.6	2.70439	1.83629	0.882286	0.374024	0.114964	0.142013	0.076256		222.6	3.5481	2.99441	1.96329	0.937528	0.41194	0.148734	0.078586		222.6	3.28714	2.42664	1.60148	0.902248	0.407373	0.227263	0.101175
	222.8	2.70475	1.83712	0.8829	0.374289	0.115466	0.141855	0.076778		222.8	3.54824	2.99529	1.96364	0.937576	0.4114	0.148268	0.078644		222.8	3.2879	2.42797	1.60176	0.902808	0.408065	0.227619	0.100991
	223	2.70574	1.83828	0.884613	0.375053	0.116001	0.14234	0.077192		223	3.54869	2.99587	1.96451	0.937631	0.411143	0.148569	0.078291		223	3.28863	2.42874	1.6019	0.902825	0.408118	0.227747	0.101288
	223.2	2.70673	1.83952	0.885899	0.375655	0.116709	0.142525	0.077942		223.2	3.54909	2.99696	1.96527	0.938426	0.411126	0.148882	0.07818		223.2	3.28889	2.42964	1.60229	0.903582	0.408479	0.227958	0.101756
	223.4	2.70725	1.84085	0.88664	0.375973	0.116752	0.14304	0.077883		223.4	3.54974	2.99754	1.96605	0.939021	0.410445	0.149067	0.078209		223.4	3.28903	2.4295	1.60232	0.903347	0.408332	0.227507	0.101138
	223.6	2.70802	1.84202	0.888198	0.376933	0.117506	0.143358	0.077896		223.6	3.55005	2.99825	1.96686	0.939424	0.410454	0.148895	0.07762		223.6	3.28914	2.42959	1.6022	0.903207	0.408357	0.227332	0.101126
	223.8	2.709	1.84329	0.889192	0.377865	0.118406	0.143842	0.078869		223.8	3.55074	2.99926	1.9679	0.9402	0.411227	0.149565	0.077913		223.8	3.28892	2.42994	1.6026	0.903322	0.408187	0.227701	0.100955
	224	2.71	1.8448	0.890503	0.378323	0.119514	0.144712	0.079257		224	3.55133	3.00045	1.96932	0.940933	0.411313	0.149845	0.078603		224	3.28924	2.43051	1.60295	0.90374	0.408224	0.22746	0.100884
	224.2	2.71139	1.84645	0.891345	0.379122	0.120113	0.145221	0.079244		224.2	3.55275	3.00168	1.97107	0.942047	0.412381	0.151193	0.079326		224.2	3.28954	2.43085	1.60342	0.904486	0.408526	0.227387	0.100813
	224.4	2.71183	1.84702	0.891758	0.379503	0.119949	0.145852	0.07923		224.4	3.55342	3.00248	1.97215	0.942816	0.412533	0.151029	0.079445		224.4	3.2901	2.43201	1.60466	0.905173	0.408871	0.227593	0.101398
	224.6	2.7128	1.84841	0.892745	0.379631	0.120933	0.146187	0.079172		224.6	3.55377	3.00257	1.97329	0.943371	0.413197	0.150471	0.079686		224.6	3.2905	2.4324	1.60515	0.905141	0.408385	0.227712	0.100645
	224.8	2.71374	1.84959	0.893839	0.380365	0.121496	0.14676	0.079586		224.8	3.55432	3.00369	1.97482	0.944243	0.413812	0.150648	0.079672		224.8	3.29057	2.43277	1.60563	0.905258	0.408694	0.227614	0.100659
	225	2.71426	1.85066	0.894649	0.380972	0.12196	0.14726	0.079771		225	3.55472	3.00428	1.97548	0.944733	0.41458	0.151397	0.079746		225	3.29094	2.43309	1.60654	0.905858	0.408671	0.22756	0.100787
	225.2	2.71465	1.85137	0.895208	0.381227	0.121962	0.1477	0.07959		225.2	3.55461	3.00515	1.97644	0.945414	0.414547	0.150975	0.079199		225.2	3.2913	2.43347	1.60674	0.905992	0.408806	0.227227	0.100737
	225.4	2.71453	1.85184	0.895507	0.380998	0.121447	0.146756	0.079398		225.4	3.55515	3.00605	1.97714	0.946408	0.415321	0.150887	0.078902		225.4	3.29266	2.4344	1.60778	0.906696	0.409685	0.228141	0.101527
	225.6	2.71525	1.85297	0.895934	0.382083	0.121609	0.146441	0.079374		225.6	3.55523	3.00599	1.97753	0.946941	0.415413	0.150876	0.078869		225.6	3.29354	2.43504	1.60834	0.906973	0.409971	0.228912	0.101949
	225.8	2.71595	1.85387	0.896461	0.382758	0.121609	0.146557	0.079296		225.8	3.55569	3.00627	1.97833	0.948016	0.415957	0.151287	0.078697		225.8	3.29463	2.43589	1.60929	0.907349	0.410561	0.229884	0.102676
	226	2.71634	1.85438	0.896545	0.382546	0.121402	0.14626	0.079128		226	3.55593	3.00627	1.97873	0.948747	0.415945	0.151007	0.078552		226	3.29553	2.43667	1.60936	0.907676	0.410486	0.230401	0.103143
	226.2	2.71727	1.85513	0.897201	0.383414	0.121268	0.145939	0.078625		226.2	3.55657	3.00736	1.98019	0.949651	0.41608	0.151291	0.078781		226.2	3.29616	2.43727	1.60935	0.907431	0.41019	0.230531	0.103243
	226.4	2.71765	1.85595	0.897762	0.38374	0.120958	0.145906	0.078732		226.4	3.55773	3.00845	1.98134	0.950941	0.416677	0.151671	0.079155		226.4	3.29655	2.43789	1.60941	0.907456	0.409998	0.230188	0.102726
	226.6	2.7178	1.85658	0.898129	0.383806	0.120894	0.145404	0.078864		226.6	3.5584	3.00922	1.98195	0.951448	0.416933	0.15133	0.079325		226.6	3.29717	2.43862	1.60946	0.907555	0.41	0.230359	0.102569
	226.8	2.71869	1.85734	0.899	0.384271	0.121305	0.145653	0.078973		226.8	3.55871	3.00984	1.98304	0.95189	0.417314	0.150591	0.079318		226.8	3.29759	2.43849	1.60882	0.907267	0.409942	0.230327	0.101946
	227	2.71938	1.85831	0.90008	0.384508	0.121607	0.145931	0.079147		227	3.55953	3.01046	1.9837	0.953029	0.417492	0.150684	0.079371		227	3.29749	2.43824	1.60842	0.907483	0.409437	0.230173	0.101544
	227.2	2.71996	1.85868	0.900228	0.383976	0.121518	0.145809	0.078793		227.2	3.56008	3.01126	1.98458	0.953877	0.417955	0.151022	0.07962		227.2	3.2975	2.43838	1.60844	0.907822	0.4092	0.229897	0.100674
	227.4	2.72076	1.85928	0.900602	0.383967	0.121139	0.145873	0.078338		227.4	3.56073	3.01201	1.98564	0.954789	0.418569	0.15133	0.079912		227.4	3.29786	2.43823	1.60837	0.907695	0.408965	0.2296	0.100186
	227.6	2.72151	1.85981	0.901078	0.384268	0.121843	0.145914	0.078402		227.6	3.56115	3.01228	1.9863	0.954963	0.419033	0.151009	0.079586		227.6	3.29777	2.43889	1.60873	0.907601	0.409014	0.228958	0.100053
	227.8	2.7217	1.86018	0.90113	0.383827	0.121547	0.14582	0.078363		227.8	3.562	3.013	1.9879	0.955795	0.419928	0.151619	0.079882		227.8	3.29809	2.43956	1.60921	0.907742	0.409084	0.228792	0.099848
	228	2.72225	1.86079	0.902053	0.38377	0.122108	0.145929	0.078151		228	3.56257	3.01374	1.9888	0.956697	0.420035	0.151777	0.080052		228	3.29936	2.44005	1.61005	0.908496	0.409289	0.228499	0.099789
	228.2	2.72275	1.86123	0.902328	0.383678	0.121812	0.145747	0.077552		228.2	3.5632	3.01406	1.98967	0.957135	0.420029	0.151885	0.07968		228.2	3.29968	2.44078	1.61106	0.908946	0.409298	0.228434	0.099886
	228.4	2.72251	1.86095	0.902647	0.383735	0.121305	0.145598	0.076875		228.4	3.56349	3.01448	1.99074	0.95748	0.419995	0.151464	0.078949		228.4	3.30021	2.44157	1.61213	0.909107	0.409469	0.228449	0.099688
	228.6	2.72348	1.86196	0.90347	0.383732	0.121778	0.145668	0.076705		228.6	3.5642	3.01508	1.99174	0.957882	0.420597	0.15178	0.07892		228.6	3.30098	2.44215	1.61296	0.909458	0.40973	0.228663	0.099457
	228.8	2.7237	1.86248	0.903997	0.383717	0.121641	0.145859	0.07637		228.8	3.56473	3.016	1.99262	0.958364	0.420536	0.152285	0.078941		228.8	3.30164	2.44266	1.61339	0.910079	0.410254	0.22831	0.099686
	229	2.72371	1.86329	0.904404	0.383941	0.121393	0.146004	0.076271		229	3.56529	3.0167	1.99333	0.958651	0.421103	0.15261	0.078714		229	3.30273	2.44353	1.61408	0.910673	0.410751	0.22866	0.100006
	229.2	2.72403	1.86416	0.904483	0.384189	0.121233	0.146081	0.075852		229.2	3.56546	3.01749	1.99358	0.959165	0.420839	0.152023	0.078508		229.2	3.30357	2.44437	1.61441	0.910929	0.41126	0.228895	0.100415
	229.4	2.72473	1.86492	0.90466	0.38461	0.12087	0.14524	0.075757		229.4	3.56592	3.01785	1.99466	0.959678	0.420846	0.151916	0.078238		229.4	3.30448	2.44522	1.6146	0.911807	0.41245	0.229879	0.101219
	229.6	2.72538	1.86611	0.905046	0.385505	0.120788	0.145682	0.075729		229.6	3.56662	3.01839	1.99532	0.960392	0.420492	0.152263	0.078277		229.6	3.3049	2.44597	1.61467	0.912126	0.412668	0.230529	0.101679
	229.8	2.72611	1.86712	0.905568	0.385829	0.120909	0.145974	0.076037		229.8	3.56716	3.01905	1.99609	0.960987	0.420588	0.15218	0.078312		229.8	3.30547	2.44661	1.61462	0.912278	0.412759	0.230916	0.102159
	230	2.72719	1.86819	0.906344	0.386333	0.121076	0.146371	0.07644		230	3.56766	3.01988	1.99673	0.961547	0.420602	0.151796	0.078527		230	3.30598	2.44727	1.61423	0.912499	0.412955	0.231046	0.102649
	230.2	2.72839	1.86924	0.907169	0.387435	0.121015	0.147035	0.077149		230.2	3.56865	3.02129	1.99817	0.962696	0.421807	0.152174	0.079456		230.2	3.3068	2.44813	1.61411	0.912468	0.413687	0.230915	0.102888
	230.4	2.7292	1.87027	0.908003	0.388109	0.120867	0.147279	0.077375		230.4	3.56925	3.02237	1.99862	0.963693	0.422461	0.152517	0.079997		230.4	3.30729	2.44858	1.61429	0.912906	0.413948	0.231109	0.102813
	230.6	2.72967	1.87093	0.908621	0.388427	0.120706	0.147403	0.077396		230.6	3.56958	3.02308	1.99925	0.96362	0.422582	0.152369	0.079882		230.6	3.30792	2.44938	1.614	0.913272	0.41409	0.231777	0.103175
	230.8	2.73059	1.87198	0.909785	0.38881	0.121031	0.148032	0.077682		230.8	3.57036	3.02406	2.00039	0.964732	0.423145	0.152947	0.080807		230.8	3.30805	2.44957	1.61376	0.913269	0.414093	0.231625	0.102821
	231	2.73156	1.87285	0.910332	0.388995	0.12139	0.148245	0.077995		231	3.57087	3.02528	2.00102	0.965429	0.423576	0.153076	0.081404		231	3.30831	2.45001	1.61395	0.913752	0.413737	0.231296	0.102366
	231.2	2.73292	1.8734	0.911016	0.389146	0.121623	0.148313	0.078454		231.2	3.57168	3.02614	2.00257	0.966184	0.424773	0.153705	0.08181		231.2	3.30934	2.45115	1.61472	0.914253	0.414012	0.231383	0.102767
	231.4	2.73402	1.87437	0.91171	0.389854	0.121937	0.148432	0.079012		231.4	3.5725	3.0265	2.00366	0.966942	0.425099	0.15366	0.082208		231.4	3.30998	2.45185	1.61498	0.914064	0.414207	0.231396	0.103162
	231.6	2.7342	1.87521	0.912561	0.389683	0.122125	0.14818	0.079086		231.6	3.57278	3.02677	2.00468	0.967161	0.425334	0.153904	0.081589		231.6	3.31048	2.45195	1.61504	0.913838	0.413721	0.230537	0.102729
	231.8	2.73363	1.8756	0.913732	0.389275	0.121849	0.147985	0.07908		231.8	3.57351	3.02746	2.00545	0.968044	0.426462	0.154384	0.081956		231.8	3.31103	2.45182	1.6155	0.913595	0.41348	0.230199	0.102436
	232	2.73412	1.87688	0.914901	0.389771	0.122627	0.147983	0.079364		232	3.57388	3.0279	2.00605	0.968237	0.426541	0.154038	0.081683		232	3.31184	2.45217	1.61607	0.913457	0.413542	0.229934	0.101974
	232.2	2.73487	1.87744	0.915488	0.389935	0.122773	0.147931	0.079037		232.2	3.57465	3.02838	2.0073	0.968708	0.427277	0.1543	0.081872		232.2	3.31247	2.45305	1.61726	0.913964	0.413979	0.229938	0.102014
	232.4	2.73475	1.87782	0.915904	0.389997	0.122516	0.147461	0.07911		232.4	3.57514	3.02879	2.00812	0.968836	0.427909	0.154309	0.081499		232.4	3.31307	2.45319	1.61816	0.91397	0.413934	0.229744	0.101325
	232.6	2.73564	1.87904	0.916646	0.389612	0.123388	0.147666	0.079256		232.6	3.57588	3.02959	2.00933	0.969599	0.428161	0.154654	0.081531		232.6	3.31376	2.45331	1.61901	0.914187	0.414093	0.229968	0.101086
	232.8	2.73561	1.8798	0.917275	0.38948	0.123823	0.147674	0.079601		232.8	3.57663	3.03034	2.01054	0.970721	0.42904	0.15548	0.082289		232.8	3.31433	2.45335	1.61972	0.914359	0.414119	0.229923	0.100968
	233	2.73603	1.88148	0.91812	0.390085	0.124488	0.147899	0.080379		233	3.57695	3.03083	2.01102	0.971286	0.429411	0.155674	0.081686		233	3.31466	2.45266	1.62046	0.913944	0.413882	0.229872	0.100623
	233.2	2.73678	1.8827	0.918567	0.390379	0.12476	0.147742	0.080605		233.2	3.57714	3.03125	2.01154	0.97201	0.429252	0.155796	0.081282		233.2	3.31506	2.45276	1.62112	0.914084	0.414112	0.229928	0.100569
	233.4	2.7376	1.88373	0.919467	0.390915	0.125068	0.147853	0.080674		233.4	3.57799	3.03215	2.01286	0.973105	0.429661	0.155995	0.080927		233.4	3.31554	2.4531	1.62146	0.913983	0.414246	0.22988	0.100317
	233.6	2.73795	1.88489	0.920189	0.39183	0.125515	0.148178	0.081168		233.6	3.57847	3.03289	2.01365	0.974295	0.430055	0.156171	0.080881		233.6	3.31613	2.45372	1.62229	0.914004	0.414236	0.230066	0.100703
	233.8	2.73908	1.88574	0.92084	0.392424	0.125707	0.148019	0.081273		233.8	3.57898	3.03379	2.01488	0.975579	0.430522	0.156599	0.080972		233.8	3.31641	2.454	1.62251	0.913801	0.414427	0.230327	0.101018
	234	2.73949	1.88625	0.921086	0.392647	0.125443	0.147997	0.081209		234	3.57967	3.03462	2.01506	0.976196	0.431004	0.156825	0.08143		234	3.31702	2.45458	1.62332	0.914591	0.415052	0.230271	0.10144
	234.2	2.74071	1.88755	0.92163	0.393423	0.125659	0.148286	0.081375		234.2	3.57987	3.035	2.01595	0.977071	0.430924	0.156957	0.081224		234.2	3.31737	2.45544	1.6238	0.91522	0.415582	0.230561	0.101429
	234.4	2.74133	1.88824	0.922265	0.393627	0.125668	0.148411	0.080798		234.4	3.57984	3.03555	2.01637	0.977271	0.430623	0.156923	0.081149		234.4	3.31786	2.45646	1.62423	0.915813	0.415885	0.231252	0.101905
	234.6	2.7422	1.88919	0.922892	0.393925	0.125904	0.14863	0.080706		234.6	3.57983	3.03576	2.01695	0.977268	0.430201	0.156782	0.081523		234.6	3.3181	2.45735	1.62405	0.91579	0.416175	0.231067	0.101815
	234.8	2.7428	1.88923	0.923027	0.393885	0.125497	0.147954	0.080321		234.8	3.57992	3.03663	2.01814	0.977817	0.430203	0.156514	0.081589		234.8	3.3192	2.45856	1.62505	0.916666	0.416539	0.231386	0.102292
	235	2.74402	1.89012	0.923767	0.394149	0.125355	0.147658	0.080132		235	3.58032	3.03763	2.0189	0.978134	0.430453	0.156567	0.08223		235	3.32022	2.45973	1.62586	0.917786	0.41692	0.23194	0.10307
	235.2	2.74482	1.89049	0.924431	0.394549	0.125191	0.147963	0.08008		235.2	3.58055	3.03797	2.01931	0.978859	0.43057	0.156529	0.081888		235.2	3.32094	2.46074	1.62626	0.918299	0.417309	0.231674	0.103535
	235.4	2.7453	1.89129	0.925127	0.394892	0.124962	0.147982	0.079876		235.4	3.58083	3.03867	2.02015	0.979391	0.43087	0.156724	0.082067		235.4	3.32213	2.46143	1.62649	0.918755	0.41776	0.231603	0.103749
	235.6	2.74517	1.89137	0.925978	0.39447	0.124652	0.147655	0.079213		235.6	3.58046	3.03892	2.02027	0.979726	0.430522	0.156589	0.081231		235.6	3.32316	2.46219	1.62618	0.919314	0.418007	0.231642	0.104188
	235.8	2.74547	1.89138	0.92669	0.394617	0.124609	0.147856	0.0789		235.8	3.58102	3.03957	2.02095	0.980293	0.43093	0.156454	0.081646		235.8	3.32373	2.46304	1.62672	0.919974	0.418888	0.231678	0.104638
	236	2.74655	1.89265	0.92763	0.39544	0.125035	0.148109	0.079125		236	3.58129	3.03987	2.02184	0.980335	0.430998	0.155886	0.081272		236	3.32445	2.46404	1.627	0.920453	0.419399	0.232411	0.104826
	236.2	2.74716	1.89255	0.928379	0.39587	0.124817	0.148241	0.079134		236.2	3.58207	3.04042	2.02295	0.981143	0.431642	0.156347	0.081835		236.2	3.32551	2.46493	1.62756	0.921272	0.419587	0.233544	0.104935
	236.4	2.74697	1.89277	0.929084	0.395621	0.124482	0.148203	0.078913		236.4	3.5825	3.04162	2.02393	0.981845	0.43277	0.156681	0.082047		236.4	3.32557	2.46462	1.62791	0.920955	0.419168	0.233691	0.104321
	236.6	2.74784	1.89369	0.930273	0.395724	0.124962	0.148748	0.079145		236.6	3.58291	3.04228	2.02461	0.982763	0.433384	0.15672	0.082065		236.6	3.32621	2.46446	1.62835	0.920549	0.419177	0.233745	0.104212
	236.8	2.74792	1.89424	0.931232	0.395981	0.125285	0.148838	0.079176		236.8	3.58363	3.04291	2.02564	0.983578	0.434231	0.157102	0.082241		236.8	3.32625	2.46459	1.62837	0.920658	0.419047	0.233689	0.104085
	237	2.7488	1.89583	0.932439	0.396594	0.125518	0.149536	0.079929		237	3.58387	3.04384	2.02615	0.983854	0.434717	0.157215	0.082178		237	3.32634	2.46434	1.62887	0.920396	0.418427	0.233578	0.103563
	237.2	2.74966	1.89682	0.933178	0.397124	0.125612	0.149846	0.080398		237.2	3.58512	3.04496	2.02751	0.984946	0.435489	0.157759	0.082476		237.2	3.32665	2.46508	1.62925	0.920566	0.418235	0.233975	0.103659
	237.4	2.75054	1.8981	0.934141	0.397964	0.12599	0.15014	0.080363		237.4	3.58577	3.04574	2.02858	0.985692	0.435808	0.157557	0.082313		237.4	3.32654	2.46517	1.62914	0.919984	0.417614	0.233803	0.10334
	237.6	2.75106	1.89865	0.934654	0.398485	0.12605	0.150073	0.080787		237.6	3.58669	3.04689	2.03045	0.987209	0.436574	0.158388	0.082559		237.6	3.3263	2.46532	1.62914	0.919669	0.417065	0.233583	0.102857
	237.8	2.75188	1.89969	0.934812	0.398791	0.12601	0.150203	0.081023		237.8	3.58764	3.04737	2.03127	0.987916	0.436778	0.158646	0.082716		237.8	3.32668	2.46576	1.62917	0.919731	0.416962	0.234142	0.102659
	238	2.75249	1.90057	0.935182	0.399331	0.126107	0.150639	0.081345		238	3.58785	3.04756	2.03174	0.987638	0.436317	0.158007	0.08233		238	3.32719	2.46619	1.62959	0.920131	0.417064	0.234175	0.102353
	238.2	2.75305	1.90185	0.935462	0.39927	0.126427	0.150729	0.081722		238.2	3.58786	3.04829	2.03285	0.988585	0.436803	0.158532	0.082235		238.2	3.3273	2.46673	1.62958	0.920368	0.416904	0.234552	0.101858
	238.4	2.75346	1.90261	0.93556	0.39931	0.126833	0.150912	0.082254		238.4	3.5883	3.04897	2.03353	0.989023	0.437074	0.158574	0.082229		238.4	3.32799	2.46726	1.62955	0.920515	0.416836	0.234375	0.101451
	238.6	2.7541	1.90345	0.935414	0.399631	0.126739	0.150457	0.081989		238.6	3.58872	3.04975	2.03455	0.989459	0.437386	0.158842	0.082514		238.6	3.32867	2.46787	1.63003	0.92071	0.417424	0.234268	0.101369
	238.8	2.754	1.90365	0.935004	0.399305	0.126452	0.149633	0.081389		238.8	3.58927	3.05102	2.03565	0.99001	0.437642	0.159013	0.082743		238.8	3.32971	2.46849	1.63124	0.921211	0.417651	0.234428	0.101583
	239	2.75434	1.90456	0.935234	0.399717	0.126488	0.149593	0.080972		239	3.58964	3.05191	2.03609	0.990607	0.437409	0.159554	0.083104		239	3.33018	2.46905	1.63164	0.921491	0.417864	0.23409	0.101451
	239.2	2.75448	1.90466	0.935575	0.400306	0.126642	0.149725	0.081231		239.2	3.59003	3.05274	2.03687	0.991598	0.437947	0.159887	0.082878		239.2	3.3315	2.46974	1.63206	0.922063	0.418662	0.234275	0.1019
	239.4	2.7552	1.90579	0.936208	0.400937	0.12702	0.149472	0.081183		239.4	3.59095	3.05341	2.0376	0.992039	0.438246	0.160168	0.083356		239.4	3.33279	2.47032	1.63259	0.922932	0.419178	0.234576	0.102681
	239.6	2.75621	1.90623	0.936659	0.401185	0.127154	0.149297	0.080675		239.6	3.59111	3.05344	2.03746	0.992483	0.437517	0.159484	0.08284		239.6	3.33353	2.47089	1.63256	0.923165	0.419546	0.234651	0.102829
	239.8	2.75719	1.90753	0.937672	0.402029	0.127361	0.149567	0.080772		239.8	3.59203	3.0536	2.03813	0.993365	0.438081	0.159372	0.083087		239.8	3.33411	2.47152	1.63273	0.923707	0.41996	0.235036	0.102624
	240	2.75783	1.90862	0.938651	0.402624	0.127612	0.149245	0.080345		240	3.59239	3.05368	2.03825	0.993741	0.438437	0.159134	0.083304		240	3.33493	2.4725	1.63329	0.924044	0.420155	0.235704	0.102938
	240.2	2.75823	1.90854	0.93922	0.402814	0.127303	0.149032	0.079951		240.2	3.5931	3.05445	2.03931	0.994627	0.43918	0.15939	0.083664		240.2	3.33552	2.47267	1.63363	0.924176	0.420202	0.235749	0.103202
	240.4	2.75849	1.90885	0.940019	0.402578	0.126955	0.148874	0.079306		240.4	3.59394	3.05553	2.04024	0.995568	0.440178	0.159806	0.084481		240.4	3.33575	2.47299	1.63403	0.924542	0.420463	0.235307	0.103678
	240.6	2.75986	1.91019	0.941538	0.403567	0.12719	0.149106	0.079317		240.6	3.59393	3.05541	2.04076	0.99546	0.44033	0.159398	0.084713		240.6	3.33646	2.47342	1.6346	0.925134	0.420444	0.235274	0.104269
	240.8	2.76067	1.91048	0.942316	0.403382	0.127283	0.149541	0.078992		240.8	3.59508	3.05629	2.04234	0.996428	0.441163	0.15991	0.085059		240.8	3.33652	2.47432	1.63487	0.926307	0.420433	0.23584	0.104687
	241	2.76131	1.91149	0.943148	0.4037	0.126973	0.150045	0.079081		241	3.59533	3.05702	2.04323	0.996677	0.441391	0.159924	0.085368		241	3.33682	2.47463	1.6352	0.926657	0.420024	0.236197	0.105256
	241.2	2.7626	1.91251	0.944283	0.40404	0.127643	0.150455	0.079232		241.2	3.59645	3.05755	2.04506	0.997933	0.441864	0.160304	0.085497		241.2	3.33743	2.47537	1.63576	0.92714	0.420019	0.236182	0.105861
	241.4	2.76374	1.91329	0.945227	0.404128	0.128082	0.150812	0.079268		241.4	3.59678	3.05808	2.04647	0.998801	0.4426	0.160304	0.085011		241.4	3.33752	2.47586	1.63528	0.927286	0.41983	0.235531	0.10589
	241.6	2.76467	1.91428	0.946173	0.404586	0.128204	0.151269	0.079761		241.6	3.59781	3.05924	2.04839	1.00035	0.443674	0.161194	0.085236		241.6	3.33789	2.47658	1.63544	0.927292	0.419749	0.235392	0.106107
	241.8	2.76506	1.9151	0.946705	0.40498	0.128633	0.151772	0.07994		241.8	3.59862	3.05959	2.0493	1.00129	0.444098	0.161396	0.085245		241.8	3.33852	2.47706	1.63596	0.927621	0.419635	0.235851	0.106342
	242	2.76536	1.91492	0.947206	0.404812	0.128699	0.151666	0.079648		242	3.59898	3.06075	2.05048	1.00231	0.444446	0.161811	0.084305		242	3.33892	2.47767	1.63629	0.927839	0.419772	0.2357	0.106592
	242.2	2.76597	1.91563	0.947615	0.404845	0.129173	0.151752	0.079619		242.2	3.59931	3.06178	2.05122	1.00323	0.445081	0.162104	0.083893		242.2	3.33979	2.47865	1.63694	0.928197	0.420081	0.235536	0.106443
	242.4	2.76676	1.91654	0.947955	0.405469	0.129621	0.152109	0.080528		242.4	3.59991	3.0624	2.05257	1.00389	0.445731	0.162091	0.083608		242.4	3.34016	2.47892	1.63709	0.928129	0.420155	0.235554	0.106299
	242.6	2.7668	1.91746	0.948107	0.405543	0.129383	0.1518	0.080318		242.6	3.60081	3.06339	2.05349	1.00484	0.446102	0.162277	0.083672		242.6	3.34126	2.47997	1.6381	0.928243	0.420736	0.236045	0.107137
	242.8	2.76696	1.91755	0.948086	0.405749	0.129174	0.151811	0.080462		242.8	3.60106	3.06458	2.05439	1.00593	0.446198	0.162584	0.083825		242.8	3.34166	2.47989	1.63834	0.92783	0.420258	0.235781	0.106298
	243	2.76709	1.91809	0.948626	0.406129	0.129201	0.151745	0.080511		243	3.60109	3.06501	2.05476	1.00633	0.44627	0.162574	0.083765		243	3.34218	2.48075	1.63863	0.928038	0.420519	0.235725	0.106151
	243.2	2.76796	1.9196	0.949741	0.40692	0.129849	0.152002	0.081353		243.2	3.60166	3.06562	2.05525	1.00708	0.44648	0.162434	0.083819		243.2	3.34326	2.48101	1.63938	0.928257	0.420944	0.235905	0.106293
	243.4	2.76857	1.92068	0.94999	0.406975	0.129657	0.151917	0.080971		243.4	3.60224	3.06591	2.05523	1.00743	0.446215	0.162285	0.083719		243.4	3.34307	2.48068	1.63872	0.927511	0.420478	0.235076	0.10535
	243.6	2.76901	1.92138	0.950183	0.407256	0.129471	0.151597	0.081017		243.6	3.60218	3.06602	2.05521	1.00751	0.446077	0.161979	0.083638		243.6	3.34359	2.48133	1.63887	0.927608	0.420392	0.235194	0.104421
	243.8	2.76917	1.92231	0.95049	0.407767	0.129175	0.151491	0.080915		243.8	3.60235	3.06614	2.05554	1.00748	0.446216	0.161558	0.083597		243.8	3.3444	2.482	1.6396	0.927834	0.420918	0.235676	0.104218
	244	2.76927	1.92238	0.95115	0.407709	0.12881	0.150568	0.080779		244	3.6026	3.06728	2.05626	1.00747	0.446657	0.161602	0.083932		244	3.34522	2.48244	1.64019	0.928187	0.421479	0.23576	0.104573
	244.2	2.7695	1.92277	0.951527	0.407669	0.128591	0.150239	0.080801		244.2	3.60365	3.06815	2.05706	1.00784	0.447297	0.161825	0.084595		244.2	3.34612	2.48278	1.64088	0.92824	0.421908	0.235559	0.104364
	244.4	2.7701	1.92343	0.95255	0.408091	0.128545	0.150566	0.081106		244.4	3.60395	3.06916	2.05748	1.00777	0.44742	0.161705	0.085401		244.4	3.34717	2.48373	1.64116	0.928889	0.422235	0.236131	0.104485
	244.6	2.77062	1.92436	0.953735	0.408557	0.128374	0.150584	0.08139		244.6	3.6038	3.06938	2.058	1.00741	0.447076	0.160713	0.085263		244.6	3.34754	2.48397	1.64137	0.929357	0.422005	0.236494	0.104143
	244.8	2.77044	1.92478	0.954416	0.408235	0.128627	0.150933	0.081245		244.8	3.60475	3.07013	2.05879	1.00845	0.447589	0.160847	0.085095		244.8	3.34808	2.48465	1.64178	0.929775	0.422261	0.236814	0.104089
	245	2.77052	1.92557	0.95527	0.408599	0.128545	0.150629	0.081202		245	3.60517	3.07121	2.06012	1.00866	0.447501	0.160983	0.085098		245	3.34845	2.48527	1.64191	0.930237	0.422371	0.236923	0.104727
	245.2	2.771	1.92601	0.956053	0.408348	0.128843	0.150188	0.08144		245.2	3.6057	3.07158	2.06072	1.00915	0.448123	0.161311	0.084971		245.2	3.34917	2.48587	1.64229	0.931088	0.422685	0.236703	0.104969
	245.4	2.77112	1.9268	0.956952	0.408665	0.128861	0.150138	0.081852		245.4	3.60623	3.07222	2.06159	1.01016	0.448937	0.162081	0.084769		245.4	3.34943	2.48609	1.64197	0.931291	0.422471	0.236162	0.104813
	245.6	2.77169	1.92825	0.957943	0.409351	0.129183	0.15042	0.081834		245.6	3.60685	3.07313	2.06309	1.01165	0.449402	0.16272	0.085233		245.6	3.35032	2.48665	1.64271	0.931718	0.422782	0.236445	0.104896
	245.8	2.77166	1.92827	0.958671	0.409562	0.1292	0.150183	0.08171		245.8	3.6077	3.07438	2.06389	1.01263	0.449656	0.162955	0.085432		245.8	3.35057	2.48699	1.64297	0.931914	0.422799	0.236473	0.104596
	246	2.77209	1.92825	0.959129	0.409655	0.129009	0.149717	0.081224		246	3.60786	3.07484	2.06447	1.01334	0.449605	0.162535	0.084929		246	3.35134	2.48787	1.6438	0.932491	0.42363	0.236529	0.105191
	246.2	2.77317	1.9294	0.959835	0.410427	0.128897	0.14988	0.081644		246.2	3.60886	3.07583	2.06642	1.01452	0.450665	0.16329	0.085797		246.2	3.35206	2.4884	1.64419	0.932557	0.42406	0.236976	0.105308
	246.4	2.77447	1.93107	0.960742	0.411414	0.129324	0.15044	0.082274		246.4	3.60962	3.07654	2.06745	1.01594	0.451117	0.163625	0.086162		246.4	3.35194	2.48811	1.64419	0.932391	0.423662	0.237079	0.105023
	246.6	2.77495	1.9324	0.961125	0.411952	0.12955	0.15094	0.082343		246.6	3.61057	3.07769	2.06849	1.01717	0.451541	0.164184	0.086519		246.6	3.35227	2.48873	1.64473	0.933007	0.423608	0.237321	0.105062
	246.8	2.77604	1.93316	0.961687	0.412514	0.129743	0.151428	0.082774		246.8	3.61117	3.07862	2.06972	1.01833	0.45189	0.164805	0.086922		246.8	3.35199	2.4889	1.64465	0.932748	0.42365	0.236779	0.104641
	247	2.77677	1.93453	0.962618	0.413233	0.130633	0.152056	0.082965		247	3.61143	3.07903	2.07043	1.01927	0.45202	0.16483	0.087183		247	3.3518	2.48936	1.64491	0.932792	0.423761	0.236425	0.105079
	247.2	2.77759	1.93551	0.963153	0.413806	0.130923	0.152789	0.083206		247.2	3.61146	3.07921	2.07133	1.02036	0.452222	0.165013	0.086896		247.2	3.3516	2.48943	1.64512	0.932653	0.423718	0.236163	0.104919
	247.4	2.77814	1.93584	0.963012	0.413994	0.130365	0.152786	0.082606		247.4	3.61162	3.0791	2.07165	1.02098	0.452302	0.165096	0.086708		247.4	3.35156	2.48975	1.64482	0.93261	0.423752	0.236206	0.105198
	247.6	2.779	1.93668	0.963041	0.415027	0.130925	0.152691	0.082597		247.6	3.6114	3.07883	2.07228	1.02077	0.452229	0.164537	0.08637		247.6	3.35215	2.49031	1.64563	0.933383	0.423433	0.236281	0.104816
	247.8	2.77965	1.93727	0.963472	0.415428	0.131271	0.153138	0.082749		247.8	3.61135	3.07898	2.07282	1.02123	0.45273	0.164305	0.08617		247.8	3.35296	2.49081	1.646	0.933424	0.423877	0.236078	0.105164
	248	2.78015	1.9378	0.963901	0.415568	0.131429	0.15295	0.082912		248	3.61202	3.0797	2.07368	1.02208	0.453172	0.164418	0.086024		248	3.35412	2.49144	1.64616	0.933673	0.423415	0.236197	0.105559
	248.2	2.78094	1.93856	0.964671	0.416133	0.132033	0.153492	0.083059		248.2	3.61226	3.07979	2.07394	1.02219	0.452775	0.164283	0.085735		248.2	3.35474	2.49235	1.64646	0.933445	0.423066	0.236022	0.10534
	248.4	2.78191	1.93949	0.965711	0.416339	0.132597	0.154488	0.083638		248.4	3.61253	3.08054	2.07462	1.02233	0.452799	0.164213	0.085619		248.4	3.3553	2.49271	1.64597	0.933526	0.422731	0.23586	0.105301
	248.6	2.78248	1.94008	0.966252	0.416363	0.132809	0.154455	0.083733		248.6	3.61239	3.0806	2.075	1.02188	0.452311	0.163787	0.084715		248.6	3.35553	2.49344	1.64577	0.933616	0.422554	0.235774	0.1055
	248.8	2.78273	1.94081	0.96705	0.416409	0.132845	0.15428	0.083519		248.8	3.61278	3.08123	2.07625	1.02212	0.452981	0.164284	0.084301		248.8	3.35621	2.49397	1.64586	0.933688	0.422747	0.235433	0.105729
	249	2.78321	1.9414	0.967536	0.416009	0.132534	0.15394	0.083792		249	3.61243	3.08182	2.07655	1.02182	0.453093	0.164106	0.083795		249	3.35677	2.4947	1.64594	0.934248	0.422866	0.235903	0.105907
	249.2	2.78351	1.94188	0.967769	0.41509	0.132074	0.153075	0.083813		249.2	3.61199	3.08194	2.07655	1.02144	0.452556	0.163897	0.083209		249.2	3.35758	2.49483	1.6465	0.934587	0.422852	0.235625	0.105379
	249.4	2.78397	1.94277	0.968742	0.415008	0.131698	0.152748	0.084068		249.4	3.61283	3.08302	2.07814	1.02298	0.453405	0.16503	0.083563		249.4	3.35828	2.49504	1.64684	0.934211	0.422955	0.235281	0.105056
	249.6	2.78506	1.94345	0.96951	0.414918	0.131889	0.152619	0.084029		249.6	3.61358	3.08454	2.07929	1.02382	0.454032	0.164931	0.084465		249.6	3.35872	2.49568	1.64723	0.934186	0.423619	0.235751	0.104768
	249.8	2.78573	1.94301	0.96995	0.414626	0.13094	0.152114	0.083353		249.8	3.61469	3.0857	2.08038	1.024	0.454053	0.164723	0.084889		249.8	3.35913	2.49634	1.6476	0.934426	0.424199	0.236141	0.10498
	250	2.78637	1.94338	0.970536	0.414559	0.130783	0.151891	0.082846		250	3.61546	3.08624	2.08154	1.02457	0.454772	0.164784	0.085469		250	3.36025	2.49698	1.64896	0.935076	0.424995	0.237058	0.105315
	250.2	2.78767	1.9444	0.971309	0.414839	0.130849	0.152058	0.082763		250.2	3.61674	3.08747	2.08296	1.02565	0.455542	0.165544	0.086236		250.2	3.36058	2.49737	1.64935	0.935192	0.425117	0.237668	0.104774
	250.4	2.78832	1.94536	0.971862	0.415628	0.131187	0.152453	0.082627		250.4	3.61712	3.08841	2.0835	1.02625	0.455643	0.165039	0.0859		250.4	3.36149	2.49833	1.65047	0.935614	0.425778	0.238256	0.10478
	250.6	2.78849	1.94602	0.972204	0.415274	0.131443	0.152698	0.083		250.6	3.61816	3.09001	2.08501	1.02743	0.456971	0.166002	0.086879		250.6	3.36265	2.49999	1.6518	0.936379	0.427057	0.239224	0.105587
	250.8	2.78915	1.94648	0.972691	0.415383	0.131636	0.152833	0.083004		250.8	3.61922	3.09113	2.08564	1.02836	0.457053	0.166048	0.087051		250.8	3.36302	2.50058	1.6525	0.936512	0.427525	0.239006	0.105699
	251	2.78903	1.9466	0.972929	0.415857	0.131746	0.152623	0.082355		251	3.61971	3.09217	2.08706	1.02963	0.457655	0.166282	0.087278		251	3.36353	2.50118	1.65329	0.937111	0.427329	0.238822	0.105757
	251.2	2.78932	1.94657	0.973065	0.416135	0.131591	0.152242	0.081525		251.2	3.62019	3.09267	2.08747	1.03068	0.457936	0.166241	0.087125		251.2	3.36351	2.50178	1.65381	0.937402	0.427579	0.23878	0.105722
	251.4	2.78968	1.94729	0.973177	0.416779	0.131737	0.152284	0.081156		251.4	3.62062	3.09281	2.08792	1.03173	0.45816	0.166169	0.087273		251.4	3.36407	2.50181	1.65434	0.937715	0.427515	0.23846	0.106046
	251.6	2.79018	1.94788	0.973635	0.417437	0.132086	0.15225	0.081141		251.6	3.62117	3.09276	2.08911	1.03236	0.45851	0.166434	0.087191		251.6	3.36432	2.50203	1.6549	0.938005	0.427282	0.237931	0.105278
	251.8	2.7901	1.94858	0.974158	0.417753	0.132043	0.152445	0.080711		251.8	3.62181	3.09323	2.08958	1.03347	0.459049	0.166955	0.087657		251.8	3.36478	2.50205	1.65512	0.937986	0.426914	0.237427	0.104859
	252	2.79035	1.94912	0.974338	0.41824	0.131972	0.152657	0.080137		252	3.6224	3.09374	2.09032	1.03429	0.45899	0.16691	0.087424		252	3.36481	2.50197	1.6553	0.937293	0.425759	0.236697	0.104403
	252.2	2.79091	1.94992	0.975289	0.418728	0.132512	0.152616	0.080426		252.2	3.62254	3.09435	2.09085	1.03456	0.459015	0.166893	0.087376		252.2	3.36488	2.50205	1.65474	0.936839	0.425288	0.236291	0.103853
	252.4	2.79165	1.95135	0.976031	0.419412	0.133106	0.152733	0.080684		252.4	3.62309	3.09496	2.09169	1.03497	0.459535	0.167301	0.087059		252.4	3.36501	2.50186	1.65404	0.93642	0.424816	0.235386	0.103558
	252.6	2.79208	1.95209	0.976755	0.419899	0.133286	0.152304	0.080954		252.6	3.62284	3.09566	2.09239	1.03437	0.45925	0.16721	0.08662		252.6	3.36552	2.5026	1.65412	0.936229	0.424982	0.235422	0.103897
	252.8	2.79209	1.95329	0.977996	0.420247	0.132928	0.152413	0.081336		252.8	3.62352	3.09623	2.0934	1.03522	0.459561	0.167438	0.086453		252.8	3.36592	2.50244	1.65394	0.936205	0.424776	0.234959	0.10353
	253	2.79244	1.95433	0.978713	0.420559	0.132824	0.152729	0.081645		253	3.6239	3.09658	2.09385	1.03605	0.459343	0.167301	0.086516		253	3.36616	2.50213	1.65419	0.936066	0.424497	0.235206	0.103178
	253.2	2.79253	1.95463	0.979151	0.420047	0.132425	0.152076	0.081543		253.2	3.62446	3.09713	2.0949	1.03663	0.45915	0.16736	0.0867		253.2	3.36665	2.5018	1.65465	0.935928	0.424179	0.235086	0.103693
	253.4	2.79318	1.95549	0.980313	0.420831	0.132692	0.152379	0.08178		253.4	3.62569	3.09768	2.09576	1.03771	0.460099	0.167496	0.086906		253.4	3.36716	2.50249	1.65458	0.936296	0.424448	0.235604	0.104039
	253.6	2.7935	1.95582	0.980994	0.420925	0.132488	0.152549	0.081553		253.6	3.62587	3.09809	2.09608	1.03767	0.460147	0.167231	0.087146		253.6	3.36806	2.50315	1.65518	0.936818	0.425075	0.236125	0.103968
	253.8	2.79387	1.95577	0.981535	0.420962	0.132255	0.152328	0.081411		253.8	3.62618	3.09846	2.09707	1.03793	0.46044	0.167287	0.087346		253.8	3.36889	2.50346	1.65557	0.937739	0.425206	0.236688	0.104126
	254	2.79423	1.95653	0.982176	0.421245	0.132556	0.152149	0.08149		254	3.62648	3.09906	2.09792	1.03847	0.460768	0.167328	0.087349		254	3.37009	2.50406	1.65633	0.937843	0.42572	0.237703	0.104315
	254.2	2.79476	1.95638	0.982231	0.421188	0.132377	0.152166	0.081459		254.2	3.6271	3.09941	2.09915	1.03917	0.461612	0.167521	0.087466		254.2	3.37119	2.50503	1.65739	0.938111	0.426433	0.238356	0.10497
	254.4	2.79481	1.95692	0.982321	0.42153	0.132405	0.152313	0.081715		254.4	3.62735	3.10008	2.10021	1.03975	0.46217	0.167917	0.087953		254.4	3.37208	2.50605	1.65789	0.938551	0.42715	0.238849	0.105925
	254.6	2.79571	1.95754	0.98311	0.421381	0.132856	0.15237	0.081902		254.6	3.62863	3.10111	2.10149	1.04057	0.462856	0.168685	0.088235		254.6	3.37255	2.5067	1.65783	0.938568	0.427647	0.238985	0.106168
	254.8	2.79614	1.95738	0.983014	0.421463	0.13263	0.151776	0.08137		254.8	3.62986	3.10262	2.10279	1.04128	0.46365	0.169291	0.088651		254.8	3.37298	2.50725	1.65844	0.939272	0.427463	0.239119	0.106516
	255	2.79643	1.95736	0.983461	0.42174	0.132738	0.151424	0.081174		255	3.63061	3.10331	2.10428	1.04217	0.464398	0.16964	0.089086		255	3.37366	2.5083	1.6591	0.94056	0.427737	0.239806	0.107327
	255.2	2.79696	1.95802	0.983725	0.422007	0.13268	0.151353	0.080886		255.2	3.63112	3.10432	2.10554	1.0434	0.465345	0.170317	0.089808		255.2	3.374	2.50907	1.65971	0.941134	0.428512	0.240278	0.107959
	255.4	2.79681	1.9588	0.983771	0.421788	0.13253	0.151498	0.080759		255.4	3.63155	3.10469	2.10652	1.04433	0.466431	0.171311	0.09005		255.4	3.37435	2.5097	1.66019	0.941709	0.42856	0.240123	0.10777
	255.6	2.79718	1.95889	0.984277	0.421833	0.1324	0.150977	0.080049		255.6	3.63206	3.10492	2.1069	1.0448	0.466527	0.171436	0.090046		255.6	3.3748	2.51088	1.66035	0.942078	0.428619	0.240186	0.107722
	255.8	2.79736	1.95939	0.984513	0.421775	0.132195	0.150782	0.079077		255.8	3.63215	3.10599	2.10765	1.04583	0.466974	0.171814	0.090309		255.8	3.37494	2.5111	1.66046	0.941903	0.428259	0.240021	0.107575
	256	2.79794	1.96003	0.985206	0.422208	0.132346	0.150838	0.07896		256	3.63281	3.10685	2.10865	1.04703	0.46772	0.172172	0.090446		256	3.37487	2.51191	1.66061	0.941623	0.42807	0.240058	0.107587
	256.2	2.79874	1.96156	0.986026	0.423125	0.132839	0.150847	0.07975		256.2	3.63287	3.10777	2.10918	1.04758	0.468103	0.17207	0.090465		256.2	3.37585	2.51273	1.66056	0.941841	0.42827	0.240612	0.107383
	256.4	2.79932	1.96273	0.986737	0.423909	0.133026	0.151155	0.08032		256.4	3.63375	3.10863	2.11033	1.04834	0.468321	0.172595	0.09027		256.4	3.37571	2.51261	1.66008	0.941845	0.427852	0.239862	0.106796
	256.6	2.79989	1.96412	0.987824	0.424651	0.133509	0.15193	0.08086		256.6	3.63474	3.10996	2.11135	1.04933	0.468955	0.17343	0.091216		256.6	3.37618	2.5132	1.66047	0.942027	0.428082	0.239968	0.106726
	256.8	2.80024	1.96561	0.989026	0.42567	0.133934	0.152547	0.081317		256.8	3.63502	3.11024	2.11184	1.0501	0.468638	0.172987	0.090732		256.8	3.37611	2.51365	1.66043	0.942203	0.42767	0.240013	0.106353
	257	2.80078	1.96672	0.9897	0.426444	0.134141	0.152444	0.081565		257	3.63538	3.11102	2.11283	1.05098	0.4688	0.172716	0.090407		257	3.37645	2.5139	1.66047	0.942375	0.427498	0.23995	0.106051
	257.2	2.80132	1.96788	0.99065	0.426733	0.134577	0.152481	0.081555		257.2	3.63545	3.1116	2.11299	1.05158	0.469004	0.172188	0.089834		257.2	3.37697	2.5146	1.66104	0.942674	0.42769	0.240155	0.106294
	257.4	2.80185	1.96915	0.991367	0.427714	0.135133	0.152818	0.081854		257.4	3.63571	3.11212	2.11316	1.05195	0.469428	0.171733	0.089319		257.4	3.37768	2.51513	1.66106	0.942899	0.427695	0.240021	0.105881
	257.6	2.8019	1.9696	0.991744	0.427479	0.134914	0.15227	0.081491		257.6	3.63548	3.11241	2.11344	1.05218	0.46952	0.171529	0.089209		257.6	3.37846	2.51487	1.66105	0.942501	0.42752	0.239132	0.105123
	257.8	2.80291	1.9706	0.992592	0.428171	0.13558	0.152826	0.081919		257.8	3.63588	3.11272	2.11439	1.05271	0.469495	0.171035	0.089285		257.8	3.37885	2.51505	1.66132	0.942616	0.427478	0.239103	0.104884
	258	2.80377	1.97191	0.993252	0.428778	0.13563	0.153412	0.081957		258	3.63626	3.11279	2.11527	1.05329	0.469555	0.170453	0.088302		258	3.37987	2.5159	1.66187	0.94257	0.428365	0.239126	0.105433
	258.2	2.80525	1.97302	0.994157	0.429329	0.13595	0.154155	0.082576		258.2	3.63735	3.11302	2.11635	1.05422	0.470447	0.170553	0.088278		258.2	3.38056	2.51682	1.6627	0.942906	0.428988	0.239426	0.10585
	258.4	2.80661	1.97454	0.995225	0.429857	0.136759	0.154778	0.083226		258.4	3.63772	3.11346	2.1168	1.05452	0.470143	0.170654	0.088442		258.4	3.38103	2.5174	1.6628	0.943212	0.428761	0.239215	0.106062
	258.6	2.80773	1.975	0.99595	0.429905	0.136986	0.154635	0.08308		258.6	3.63896	3.11449	2.11843	1.05537	0.471055	0.170885	0.08832		258.6	3.38206	2.51796	1.66321	0.943069	0.429133	0.239359	0.106413
	258.8	2.80828	1.97499	0.996509	0.429727	0.136727	0.154843	0.082964		258.8	3.63944	3.11515	2.11922	1.05583	0.471859	0.171286	0.088675		258.8	3.38328	2.51899	1.6643	0.944155	0.429666	0.239809	0.106959
	259	2.80854	1.97539	0.997415	0.430085	0.136527	0.154904	0.08287		259	3.6397	3.11543	2.12048	1.05644	0.471996	0.171377	0.088631		259	3.38352	2.51916	1.66503	0.944575	0.429847	0.239847	0.107133
	259.2	2.80854	1.97585	0.997575	0.429976	0.136227	0.154784	0.082432		259.2	3.64064	3.11612	2.1218	1.05712	0.472993	0.171914	0.088525		259.2	3.38432	2.51986	1.6656	0.944462	0.429987	0.239573	0.107248
	259.4	2.80856	1.97564	0.997784	0.429393	0.136043	0.154435	0.081848		259.4	3.64153	3.11634	2.12184	1.05802	0.473302	0.172278	0.08825		259.4	3.3845	2.52042	1.6662	0.944643	0.429841	0.239322	0.107228
	259.6	2.80893	1.97537	0.998463	0.429142	0.135307	0.153956	0.08133		259.6	3.64205	3.1169	2.12224	1.05878	0.473537	0.172402	0.088479		259.6	3.3853	2.5213	1.66674	0.945126	0.430433	0.239831	0.107849
	259.8	2.80959	1.97612	0.998818	0.429202	0.134967	0.153947	0.081382		259.8	3.64274	3.11758	2.12347	1.06	0.474289	0.172809	0.08895		259.8	3.38574	2.52186	1.66723	0.945055	0.430707	0.239772	0.107905
	260	2.81049	1.97711	0.999605	0.429788	0.135043	0.154079	0.081492		260	3.64334	3.11792	2.12424	1.06061	0.474278	0.172846	0.089036		260	3.38587	2.52211	1.66759	0.945342	0.430879	0.239838	0.107507
	260.2	2.811	1.97812	1.00029	0.430196	0.135088	0.15422	0.082375		260.2	3.64359	3.11883	2.12496	1.06107	0.474679	0.173192	0.089326		260.2	3.38621	2.52228	1.66751	0.945388	0.430913	0.239586	0.107252
	260.4	2.81135	1.9783	1.00071	0.430851	0.135249	0.1541	0.082248		260.4	3.64464	3.11952	2.12557	1.0619	0.475029	0.173652	0.089892		260.4	3.38599	2.52258	1.66761	0.94614	0.4313	0.239678	0.107297
	260.6	2.81214	1.97923	1.00143	0.431448	0.135895	0.153984	0.082619		260.6	3.64496	3.12016	2.12664	1.06258	0.475028	0.173512	0.089831		260.6	3.38576	2.52305	1.66765	0.94574	0.431463	0.239818	0.10712
	260.8	2.81248	1.98004	1.00182	0.431643	0.135848	0.15342	0.082946		260.8	3.64477	3.12083	2.12716	1.06267	0.474689	0.172847	0.0892		260.8	3.38591	2.52381	1.66766	0.945991	0.431803	0.240224	0.107008
	261	2.81302	1.98038	1.00179	0.431653	0.135195	0.153227	0.082609		261	3.64535	3.12164	2.12785	1.06391	0.475304	0.172856	0.089775		261	3.38632	2.52399	1.66753	0.946013	0.431862	0.240364	0.106905
	261.2	2.81334	1.98121	1.00211	0.431755	0.135117	0.153092	0.082307		261.2	3.64585	3.12249	2.12897	1.06465	0.475745	0.172804	0.090103		261.2	3.38661	2.52423	1.66753	0.945709	0.431934	0.240529	0.106831
	261.4	2.81418	1.98212	1.00262	0.432098	0.13522	0.153459	0.082598		261.4	3.64579	3.12268	2.12933	1.0649	0.476031	0.172529	0.090419		261.4	3.38697	2.52434	1.66756	0.945715	0.431781	0.240638	0.10699
	261.6	2.81456	1.98276	1.00314	0.432176	0.13497	0.153292	0.082164		261.6	3.64583	3.12281	2.12997	1.06549	0.475936	0.1728	0.091078		261.6	3.38707	2.5245	1.66752	0.946187	0.431685	0.240504	0.106801
	261.8	2.81515	1.98397	1.00397	0.432606	0.135403	0.154014	0.083126		261.8	3.64639	3.12367	2.13111	1.06654	0.475885	0.173196	0.091323		261.8	3.3878	2.52504	1.66803	0.946526	0.431882	0.241178	0.107313
	262	2.81627	1.98524	1.00475	0.433194	0.13604	0.154352	0.083338		262	3.64682	3.12421	2.13171	1.06755	0.475864	0.173622	0.091633		262	3.38864	2.52583	1.66892	0.947358	0.432722	0.241999	0.107887
	262.2	2.81725	1.98589	1.00573	0.43349	0.13666	0.154568	0.0839		262.2	3.64725	3.12497	2.13247	1.06814	0.476181	0.173963	0.092147		262.2	3.38942	2.52669	1.66977	0.948216	0.432842	0.242901	0.108081
	262.4	2.81793	1.98647	1.00689	0.433911	0.137235	0.155013	0.084314		262.4	3.64734	3.12555	2.13341	1.06825	0.476732	0.174758	0.092851		262.4	3.38998	2.52691	1.67019	0.948509	0.432526	0.243016	0.108001
	262.6	2.81862	1.98729	1.0079	0.434581	0.137298	0.155628	0.084182		262.6	3.64737	3.12576	2.1337	1.06813	0.477068	0.174392	0.092957		262.6	3.39001	2.52673	1.67046	0.948279	0.432641	0.242978	0.107745
	262.8	2.8189	1.98794	1.00914	0.435345	0.137541	0.156246	0.08451		262.8	3.6475	3.12614	2.13441	1.06768	0.47717	0.174766	0.092404		262.8	3.39053	2.52716	1.67076	0.948671	0.432834	0.242989	0.10771
	263	2.81887	1.9887	1.00958	0.435793	0.137667	0.15641	0.084298		263	3.64845	3.12676	2.13521	1.06833	0.477866	0.174983	0.092845		263	3.39078	2.52712	1.67136	0.948839	0.432493	0.242838	0.107768
	263.2	2.81892	1.98937	1.01	0.436078	0.138335	0.156723	0.084459		263.2	3.64935	3.12724	2.13538	1.06889	0.478292	0.175242	0.092554		263.2	3.39157	2.52801	1.67138	0.949474	0.432675	0.24287	0.107814
	263.4	2.81901	1.99003	1.01044	0.43619	0.138454	0.156959	0.084611		263.4	3.64953	3.12775	2.13594	1.06971	0.478731	0.175934	0.092328		263.4	3.39252	2.52884	1.67153	0.950041	0.432989	0.242827	0.107779
	263.6	2.81924	1.99081	1.0113	0.436668	0.138211	0.157301	0.084406		263.6	3.64993	3.1277	2.13641	1.06978	0.479004	0.17585	0.091724		263.6	3.39309	2.52971	1.67145	0.950637	0.433429	0.243253	0.107789
	263.8	2.82026	1.99189	1.01172	0.437221	0.138646	0.157672	0.084242		263.8	3.65022	3.1283	2.13713	1.06984	0.478728	0.175756	0.091258		263.8	3.39339	2.5304	1.67117	0.950936	0.433696	0.242845	0.107392
	264	2.82057	1.99238	1.01237	0.437272	0.138793	0.157454	0.084184		264	3.65043	3.12953	2.13815	1.07073	0.479335	0.176222	0.090965		264	3.39341	2.53094	1.67156	0.951306	0.43428	0.242776	0.107256
	264.2	2.82093	1.9926	1.01304	0.437676	0.13881	0.157062	0.084118		264.2	3.6513	3.1307	2.13895	1.07156	0.480028	0.17669	0.090893		264.2	3.39427	2.5321	1.67183	0.951517	0.434941	0.242838	0.107196
	264.4	2.82166	1.99246	1.01296	0.437607	0.138618	0.157132	0.083657		264.4	3.65169	3.13106	2.13989	1.07227	0.480282	0.176186	0.090655		264.4	3.39484	2.53282	1.67263	0.951999	0.435441	0.242565	0.107249
	264.6	2.82273	1.99332	1.01348	0.437534	0.138815	0.157414	0.084573		264.6	3.6518	3.13163	2.1407	1.073	0.480208	0.175489	0.089795		264.6	3.3947	2.53282	1.67215	0.951286	0.434723	0.241911	0.106579
	264.8	2.82329	1.99398	1.01399	0.437742	0.138541	0.157436	0.084575		264.8	3.6521	3.13223	2.14116	1.07334	0.480357	0.175505	0.089776		264.8	3.39554	2.53368	1.67286	0.951628	0.435199	0.241792	0.106607
	265	2.82376	1.99375	1.01402	0.437387	0.138054	0.156809	0.084044		265	3.6528	3.13278	2.14216	1.07445	0.480848	0.17527	0.089833		265	3.39643	2.53462	1.67343	0.951929	0.435251	0.241771	0.107297
	265.2	2.82445	1.99459	1.01479	0.437673	0.137931	0.156461	0.084476		265.2	3.65338	3.13395	2.14345	1.07529	0.481442	0.17588	0.089702		265.2	3.39691	2.53524	1.67355	0.951881	0.435283	0.241371	0.107452
	265.4	2.825	1.99507	1.01586	0.437825	0.137584	0.156131	0.084441		265.4	3.65354	3.1341	2.14413	1.07627	0.481637	0.176285	0.090169		265.4	3.39731	2.53544	1.67432	0.952146	0.435023	0.241326	0.107641
	265.6	2.8246	1.99535	1.01603	0.437392	0.137371	0.15527	0.083926		265.6	3.65397	3.13471	2.14504	1.07703	0.482082	0.176725	0.090555		265.6	3.39787	2.53599	1.67503	0.952175	0.434426	0.241131	0.108306
	265.8	2.82528	1.99607	1.01673	0.437397	0.137901	0.154873	0.083915		265.8	3.65484	3.13567	2.14604	1.07783	0.482157	0.176976	0.090647		265.8	3.39856	2.53636	1.67558	0.951697	0.434535	0.241317	0.108534
	266	2.82592	1.99671	1.01704	0.437706	0.137977	0.154461	0.083555		266	3.65499	3.13606	2.14701	1.07818	0.482372	0.177129	0.090908		266	3.39901	2.53673	1.67683	0.952103	0.434917	0.241787	0.108748
	266.2	2.82621	1.99736	1.01774	0.437887	0.138186	0.154307	0.08378		266.2	3.6553	3.13694	2.14817	1.07845	0.483394	0.177352	0.091366		266.2	3.39948	2.53712	1.67747	0.951824	0.434211	0.241884	0.108726
	266.4	2.82717	1.99878	1.01889	0.438426	0.138689	0.154603	0.083815		266.4	3.65576	3.13736	2.14924	1.0787	0.483988	0.177804	0.091935		266.4	3.39967	2.53731	1.67735	0.951631	0.433598	0.241568	0.108455
	266.6	2.82725	1.99959	1.0195	0.439092	0.138485	0.154553	0.083634		266.6	3.65621	3.13794	2.15035	1.0791	0.484457	0.17779	0.092222		266.6	3.40004	2.53707	1.67753	0.950966	0.433565	0.241151	0.108312
	266.8	2.82748	2.00073	1.0202	0.439577	0.139252	0.154658	0.083604		266.8	3.65741	3.13914	2.15173	1.08009	0.485627	0.178601	0.092792		266.8	3.40072	2.53756	1.67766	0.951093	0.433748	0.241331	0.108506
	267	2.8279	2.00166	1.02096	0.440096	0.139589	0.15507	0.083499		267	3.65782	3.13929	2.15211	1.0812	0.486115	0.178595	0.092949		267	3.40137	2.53795	1.67807	0.951632	0.43385	0.241734	0.10876
	267.2	2.82888	2.00249	1.02195	0.44062	0.139829	0.15534	0.083918		267.2	3.65816	3.13981	2.15327	1.08228	0.486466	0.179036	0.093109		267.2	3.40176	2.53872	1.67781	0.95214	0.434323	0.242266	0.109046
	267.4	2.82959	2.00319	1.0225	0.44102	0.1398	0.155709	0.083931		267.4	3.65873	3.14019	2.1542	1.08279	0.486931	0.179403	0.09296		267.4	3.40259	2.53915	1.67782	0.952449	0.434211	0.242688	0.108976
	267.6	2.83014	2.00399	1.02331	0.441559	0.139776	0.155903	0.083468		267.6	3.65946	3.14034	2.15461	1.08327	0.486561	0.178855	0.092652		267.6	3.40218	2.53944	1.67799	0.952643	0.434353	0.243162	0.108851
	267.8	2.83085	2.00412	1.0237	0.441761	0.139375	0.155685	0.083533		267.8	3.65981	3.14138	2.15542	1.08404	0.486782	0.179383	0.093285		267.8	3.40285	2.53953	1.67768	0.95278	0.434491	0.243113	0.108625
	268	2.8311	2.00432	1.02426	0.441917	0.139419	0.155314	0.083729		268	3.65988	3.14175	2.15559	1.08514	0.486991	0.179238	0.093286		268	3.40355	2.54005	1.67836	0.953065	0.434833	0.243256	0.108436
	268.2	2.83187	2.00502	1.02509	0.442702	0.13908	0.155979	0.083882		268.2	3.66031	3.14186	2.15621	1.08551	0.486731	0.179017	0.092866		268.2	3.40452	2.54044	1.67858	0.953259	0.43505	0.243462	0.108698
	268.4	2.83234	2.00543	1.02548	0.442613	0.139098	0.156733	0.084336		268.4	3.66021	3.14162	2.15628	1.08552	0.486949	0.178267	0.092873		268.4	3.40471	2.54065	1.67896	0.95406	0.435381	0.243176	0.108578
	268.6	2.83331	2.00646	1.02607	0.443588	0.139573	0.157441	0.085095		268.6	3.66022	3.14153	2.15589	1.08545	0.486504	0.177765	0.092126		268.6	3.40498	2.54131	1.6785	0.954182	0.435322	0.243371	0.108281
	268.8	2.8335	2.00704	1.02666	0.44416	0.139591	0.157384	0.085523		268.8	3.66079	3.14231	2.15706	1.08597	0.486474	0.1777	0.092042		268.8	3.40571	2.54242	1.6793	0.954226	0.436035	0.243426	0.108409
	269	2.83383	2.0075	1.02717	0.443962	0.139364	0.15723	0.085648		269	3.66169	3.14283	2.1576	1.08696	0.486982	0.17743	0.09231		269	3.40649	2.54327	1.6798	0.954839	0.436549	0.243565	0.108812
	269.2	2.8346	2.00832	1.02802	0.444618	0.139442	0.157863	0.086212		269.2	3.6617	3.14295	2.15762	1.08726	0.48686	0.177413	0.092177		269.2	3.40694	2.54365	1.68026	0.95514	0.436805	0.243744	0.108882
	269.4	2.8348	2.00899	1.02894	0.444786	0.139669	0.158125	0.086082		269.4	3.66217	3.14329	2.15831	1.08775	0.486912	0.177288	0.091998		269.4	3.40752	2.54393	1.68066	0.955568	0.437027	0.244206	0.108857
	269.6	2.83543	2.0101	1.02894	0.444934	0.140383	0.158523	0.086156		269.6	3.66244	3.14391	2.15869	1.08796	0.487174	0.176956	0.091647		269.6	3.40761	2.54446	1.68116	0.955564	0.436949	0.244107	0.108879
	269.8	2.83637	2.01089	1.02926	0.445255	0.141191	0.158902	0.086412		269.8	3.66276	3.1445	2.15956	1.08834	0.48725	0.177212	0.091363		269.8	3.40787	2.54441	1.68124	0.955247	0.436912	0.244102	0.108392
	270	2.83704	2.01176	1.0297	0.445679	0.141638	0.159324	0.087056		270	3.66303	3.14482	2.16077	1.08914	0.48771	0.177803	0.091542		270	3.40836	2.54518	1.68196	0.955785	0.437262	0.244365	0.108382
	270.2	2.83742	2.01231	1.03015	0.445715	0.141734	0.159207	0.086426		270.2	3.66281	3.14551	2.16162	1.08977	0.488144	0.177516	0.092112		270.2	3.40903	2.54567	1.68243	0.955852	0.437286	0.244146	0.108114
	270.4	2.83776	2.01287	1.03096	0.445722	0.142155	0.159002	0.086335		270.4	3.66314	3.14623	2.16301	1.0907	0.488819	0.177986	0.092539		270.4	3.4093	2.54614	1.68284	0.955923	0.437465	0.244005	0.107913
	270.6	2.83765	2.01294	1.03143	0.446501	0.142434	0.158791	0.08613		270.6	3.6634	3.14714	2.16433	1.09179	0.489591	0.178438	0.092574		270.6	3.41006	2.54683	1.68382	0.95577	0.438471	0.24397	0.108293
	270.8	2.83854	2.01341	1.03226	0.446642	0.142968	0.159091	0.085881		270.8	3.66389	3.14748	2.1646	1.09211	0.489847	0.178256	0.092859		270.8	3.41069	2.54796	1.6846	0.956465	0.439013	0.244481	0.108851
	271	2.83914	2.01368	1.03281	0.446872	0.142844	0.158879	0.085679		271	3.66432	3.14805	2.16537	1.0926	0.489889	0.178379	0.092916		271	3.41133	2.54849	1.68521	0.956899	0.439267	0.244677	0.10911
	271.2	2.83992	2.01357	1.03326	0.447281	0.142692	0.158741	0.085592		271.2	3.6652	3.14889	2.16595	1.09282	0.489685	0.178471	0.092973		271.2	3.41188	2.54894	1.68524	0.957029	0.439369	0.244516	0.109331
	271.4	2.8396	2.01343	1.03325	0.447296	0.142306	0.158079	0.084784		271.4	3.66525	3.14931	2.16595	1.09289	0.489228	0.178547	0.092351		271.4	3.41229	2.54942	1.68575	0.957149	0.439177	0.244366	0.108955
	271.6	2.83945	2.01385	1.03366	0.447413	0.142049	0.157336	0.084393		271.6	3.66515	3.14947	2.16597	1.09283	0.489067	0.178348	0.092077		271.6	3.41297	2.55027	1.68616	0.957419	0.439794	0.244425	0.109247
	271.8	2.83933	2.01348	1.03408	0.447245	0.141311	0.156514	0.083817		271.8	3.66568	3.15025	2.16629	1.0933	0.489292	0.179224	0.092518		271.8	3.41378	2.55051	1.68592	0.957257	0.439809	0.244066	0.109055
	272	2.83941	2.01447	1.03507	0.447713	0.141216	0.156374	0.084001		272	3.66583	3.15069	2.16655	1.0939	0.489268	0.179778	0.092313		272	3.41425	2.55109	1.68638	0.957421	0.440101	0.24425	0.108466
	272.2	2.83989	2.01552	1.03578	0.447514	0.140679	0.156306	0.084054		272.2	3.66613	3.15115	2.16709	1.0939	0.489929	0.180123	0.092201		272.2	3.41495	2.55163	1.68613	0.95732	0.440487	0.244098	0.108802
	272.4	2.84062	2.0162	1.03662	0.447786	0.14104	0.156455	0.084046		272.4	3.66655	3.15157	2.16776	1.09388	0.49041	0.180168	0.092233		272.4	3.41522	2.55232	1.68621	0.957688	0.440597	0.244161	0.108246
	272.6	2.84114	2.01729	1.03719	0.448208	0.140857	0.156333	0.084287		272.6	3.66719	3.15239	2.16908	1.09456	0.491216	0.180674	0.092248		272.6	3.41558	2.55306	1.68673	0.95765	0.440552	0.24441	0.10829
	272.8	2.84153	2.01839	1.03809	0.448343	0.140907	0.156179	0.084506		272.8	3.66821	3.15367	2.16986	1.09524	0.492154	0.180748	0.092777		272.8	3.41629	2.55335	1.68766	0.957577	0.440406	0.244584	0.108134
	273	2.8423	2.01892	1.03883	0.447869	0.14059	0.156039	0.084315		273	3.6686	3.15409	2.17026	1.09575	0.492446	0.180563	0.092918		273	3.41625	2.55297	1.68784	0.958246	0.440141	0.244503	0.107791
	273.2	2.84392	2.02017	1.03978	0.448435	0.141246	0.156671	0.085298		273.2	3.66902	3.15494	2.17091	1.09677	0.493422	0.18122	0.09284		273.2	3.41659	2.55319	1.68831	0.958998	0.44033	0.244807	0.107847
	273.4	2.84479	2.02163	1.04059	0.448892	0.141829	0.157022	0.085656		273.4	3.66979	3.15574	2.17155	1.09771	0.494157	0.181346	0.09321		273.4	3.41669	2.55313	1.68831	0.958839	0.439947	0.245179	0.107552
	273.6	2.84609	2.02307	1.04118	0.449379	0.142712	0.157652	0.086366		273.6	3.67027	3.15614	2.17233	1.09881	0.494934	0.181531	0.093127		273.6	3.41663	2.55288	1.68865	0.959243	0.439619	0.244788	0.107576
	273.8	2.84682	2.024	1.04171	0.449704	0.142852	0.158185	0.086651		273.8	3.67017	3.15618	2.17313	1.09946	0.495354	0.181538	0.092969		273.8	3.41693	2.55309	1.68899	0.959578	0.43953	0.244801	0.107524
	274	2.84771	2.02463	1.04219	0.449933	0.142917	0.158418	0.086599		274	3.6701	3.15673	2.17402	1.10068	0.496008	0.181599	0.093633		274	3.4168	2.55341	1.68933	0.959718	0.439999	0.244809	0.107707
	274.2	2.84798	2.02527	1.04247	0.450119	0.142504	0.158116	0.08596		274.2	3.66994	3.15775	2.17508	1.10182	0.497225	0.181282	0.093774		274.2	3.41723	2.5533	1.68983	0.959599	0.439728	0.244304	0.107986
	274.4	2.84888	2.02636	1.04353	0.451082	0.143555	0.158717	0.086434		274.4	3.6706	3.15854	2.17643	1.10277	0.498283	0.18184	0.094267		274.4	3.41758	2.554	1.69041	0.959993	0.439736	0.244194	0.108408
	274.6	2.84908	2.0266	1.04407	0.451901	0.143621	0.158913	0.086287		274.6	3.67168	3.15902	2.1772	1.10359	0.4986	0.181733	0.093817		274.6	3.41809	2.55477	1.69025	0.960308	0.440364	0.244034	0.109063
	274.8	2.8498	2.02716	1.04453	0.452226	0.143619	0.159108	0.086669		274.8	3.67267	3.15998	2.17834	1.10417	0.499001	0.181748	0.094075		274.8	3.4186	2.55518	1.69031	0.960743	0.440376	0.244153	0.109301
	275	2.84999	2.02774	1.04479	0.452692	0.143711	0.159179	0.086609		275	3.67338	3.16065	2.17878	1.10473	0.499041	0.181859	0.094074		275	3.41894	2.55553	1.69054	0.960928	0.44062	0.243948	0.109587
	275.2	2.84992	2.02795	1.04523	0.452879	0.143528	0.159123	0.086421		275.2	3.67418	3.16142	2.17973	1.10519	0.499091	0.182171	0.093871		275.2	3.41953	2.55629	1.69035	0.961154	0.440649	0.24403	0.110256
	275.4	2.84976	2.02841	1.04547	0.452918	0.143444	0.158985	0.085726		275.4	3.67497	3.162	2.18051	1.10591	0.499783	0.182824	0.094182		275.4	3.42024	2.55687	1.69057	0.961528	0.440635	0.244266	0.110224
	275.6	2.85018	2.02886	1.04621	0.453119	0.143305	0.15905	0.085616		275.6	3.67579	3.16235	2.18145	1.10616	0.499874	0.182487	0.0943		275.6	3.42144	2.55786	1.6907	0.961857	0.440868	0.244006	0.110782
	275.8	2.85058	2.02967	1.04698	0.453854	0.143453	0.159454	0.085467		275.8	3.67705	3.16285	2.18269	1.10662	0.500111	0.182895	0.094805		275.8	3.42165	2.55821	1.69057	0.961312	0.44087	0.243833	0.110439
	276	2.85141	2.0308	1.04813	0.454687	0.144012	0.1601	0.085739		276	3.67802	3.16364	2.18415	1.10772	0.50109	0.18332	0.095306		276	3.42269	2.55914	1.69074	0.962034	0.441305	0.244398	0.110538
	276.2	2.85184	2.03138	1.04863	0.454346	0.144248	0.159782	0.085409		276.2	3.67866	3.1642	2.18536	1.10792	0.501853	0.183651	0.095923		276.2	3.42345	2.55987	1.69082	0.962185	0.441546	0.244245	0.110292
	276.4	2.85198	2.03166	1.04885	0.454759	0.144483	0.159867	0.085251		276.4	3.67945	3.16462	2.187	1.10823	0.502186	0.183613	0.095898		276.4	3.42388	2.56092	1.69164	0.962631	0.441479	0.244956	0.110255
	276.6	2.852	2.03236	1.04927	0.454563	0.144335	0.159168	0.084946		276.6	3.67994	3.16548	2.18733	1.10862	0.502368	0.183569	0.096172		276.6	3.42454	2.56147	1.69255	0.963259	0.441787	0.245506	0.11013
	276.8	2.85238	2.03224	1.04938	0.454651	0.144399	0.159145	0.084891		276.8	3.68025	3.16604	2.18781	1.10889	0.502164	0.183539	0.096486		276.8	3.42523	2.56192	1.69301	0.963504	0.441815	0.245455	0.109877
	277	2.85313	2.03247	1.04989	0.454778	0.144732	0.158807	0.085248		277	3.68028	3.16661	2.18849	1.10973	0.50229	0.183205	0.096658		277	3.42504	2.5621	1.69281	0.96374	0.441623	0.245254	0.109993
	277.2	2.85425	2.03346	1.05066	0.455244	0.145371	0.159305	0.085895		277.2	3.68026	3.16681	2.1886	1.11013	0.502337	0.183407	0.096684		277.2	3.42578	2.56278	1.69341	0.963981	0.441937	0.245433	0.110314
	277.4	2.85488	2.03414	1.05123	0.455384	0.145512	0.159508	0.086196		277.4	3.6798	3.16698	2.18825	1.11006	0.501747	0.18278	0.096538		277.4	3.4262	2.56299	1.69382	0.963734	0.441633	0.245637	0.109952
	277.6	2.856	2.03495	1.05172	0.455199	0.145882	0.159749	0.086175		277.6	3.67991	3.1672	2.18838	1.11058	0.501719	0.182798	0.095986		277.6	3.42699	2.56348	1.69421	0.964426	0.442241	0.245791	0.109964
	277.8	2.85651	2.03516	1.05196	0.455309	0.145421	0.159211	0.086253		277.8	3.67913	3.16734	2.18884	1.11088	0.501293	0.182368	0.095427		277.8	3.42723	2.5643	1.69455	0.964695	0.442689	0.246089	0.110054
	278	2.85728	2.03578	1.05271	0.455384	0.145523	0.15935	0.08654		278	3.67894	3.16792	2.18896	1.11173	0.501527	0.182355	0.09547		278	3.42737	2.56431	1.69458	0.964019	0.442639	0.246021	0.109922
	278.2	2.8581	2.03712	1.05344	0.455908	0.146057	0.159478	0.087004		278.2	3.67919	3.16862	2.18959	1.11234	0.502154	0.182367	0.095294		278.2	3.42794	2.56465	1.69481	0.964212	0.442456	0.245674	0.110085
	278.4	2.85849	2.03764	1.05412	0.455831	0.146328	0.159733	0.086931		278.4	3.67977	3.16935	2.19068	1.11293	0.502134	0.182729	0.095198		278.4	3.42863	2.56545	1.69518	0.964705	0.442267	0.24585	0.110013
	278.6	2.85866	2.03831	1.05455	0.455689	0.146462	0.159855	0.087487		278.6	3.68092	3.16985	2.19148	1.11417	0.502319	0.18328	0.095131		278.6	3.42866	2.56577	1.69534	0.964671	0.442288	0.245755	0.110171
	278.8	2.85938	2.03929	1.05488	0.456087	0.146767	0.160114	0.088458		278.8	3.68099	3.17064	2.19261	1.11495	0.502803	0.183885	0.095613		278.8	3.42921	2.56674	1.69602	0.96489	0.442199	0.245889	0.110301
	279	2.85952	2.03989	1.05561	0.456015	0.146904	0.160221	0.088331		279	3.68184	3.17129	2.19349	1.11572	0.503533	0.184471	0.095895		279	3.4293	2.56712	1.69626	0.964828	0.442074	0.245755	0.110287
	279.2	2.85978	2.04068	1.05598	0.456043	0.147138	0.160513	0.0883		279.2	3.68303	3.17247	2.19494	1.11632	0.504319	0.184929	0.096335		279.2	3.43004	2.56729	1.6966	0.96523	0.441739	0.245967	0.110358
	279.4	2.86022	2.04135	1.05624	0.456538	0.147339	0.160982	0.087701		279.4	3.68339	3.17261	2.19531	1.1164	0.504391	0.184639	0.095748		279.4	3.43092	2.56779	1.69738	0.965927	0.4416	0.246215	0.109885
	279.6	2.86059	2.04192	1.05682	0.457039	0.147177	0.161325	0.087774		279.6	3.68425	3.17333	2.19664	1.11696	0.504482	0.184414	0.095536		279.6	3.43128	2.56862	1.69819	0.966526	0.44178	0.246359	0.109919
	279.8	2.86099	2.04303	1.0576	0.458017	0.147655	0.161518	0.087835		279.8	3.68523	3.17439	2.19793	1.11812	0.505636	0.185101	0.095953		279.8	3.43106	2.56885	1.69832	0.966285	0.44177	0.246406	0.109457
	280	2.86104	2.04353	1.05822	0.458408	0.148003	0.16166	0.087568		280	3.686	3.17557	2.19967	1.12006	0.506865	0.18599	0.09647		280	3.43201	2.56959	1.69868	0.967263	0.442336	0.247157	0.109857
	280.2	2.86067	2.04368	1.05831	0.458427	0.147623	0.161058	0.087498		280.2	3.68637	3.17588	2.20025	1.1206	0.507021	0.18626	0.096446		280.2	3.43203	2.56961	1.69908	0.966805	0.442171	0.247056	0.109438
	280.4	2.86084	2.04415	1.05872	0.458885	0.147519	0.161025	0.087297		280.4	3.68608	3.17596	2.20035	1.12082	0.506974	0.18567	0.096055		280.4	3.43232	2.57044	1.69968	0.967698	0.442587	0.247851	0.110112
	280.6	2.86102	2.04455	1.05941	0.459543	0.147595	0.160903	0.08721		280.6	3.68619	3.17652	2.20053	1.1215	0.50688	0.185326	0.096176		280.6	3.43283	2.57097	1.69993	0.968167	0.443364	0.247895	0.110539
	280.8	2.86171	2.04456	1.05998	0.459957	0.147639	0.161076	0.087279		280.8	3.68604	3.17661	2.20128	1.12205	0.50703	0.184993	0.095957		280.8	3.43325	2.57161	1.69995	0.968275	0.443677	0.2479	0.110783
	281	2.86271	2.0453	1.06123	0.460674	0.148001	0.161002	0.087393		281	3.68568	3.17683	2.20106	1.12234	0.507127	0.184017	0.095551		281	3.43349	2.57143	1.69974	0.96809	0.443361	0.248149	0.1114
	281.2	2.86299	2.04548	1.06145	0.460821	0.147546	0.161196	0.087466		281.2	3.68562	3.17674	2.20119	1.12228	0.506719	0.183732	0.095156		281.2	3.43399	2.57202	1.70024	0.968263	0.443815	0.248045	0.111553
	281.4	2.86384	2.04615	1.06235	0.461418	0.147347	0.161269	0.087337		281.4	3.68529	3.17652	2.20106	1.12242	0.506313	0.183047	0.094349		281.4	3.43458	2.57215	1.70076	0.968831	0.444074	0.248503	0.111479
	281.6	2.86436	2.04638	1.06257	0.461859	0.147026	0.160725	0.086633		281.6	3.6859	3.17684	2.20198	1.12319	0.506465	0.183246	0.094344		281.6	3.43502	2.57247	1.7008	0.968651	0.444419	0.248617	0.111641
	281.8	2.86477	2.04658	1.06332	0.462514	0.14668	0.160347	0.086709		281.8	3.68602	3.17719	2.20286	1.12421	0.506443	0.18344	0.094402		281.8	3.43508	2.57275	1.70071	0.968611	0.444589	0.248671	0.112072
	282	2.86547	2.04742	1.06359	0.462531	0.146611	0.160465	0.086679		282	3.68695	3.17769	2.20399	1.12539	0.506785	0.183862	0.09535		282	3.43535	2.57277	1.70065	0.968155	0.444102	0.248345	0.111247
	282.2	2.86614	2.04809	1.06402	0.462735	0.146176	0.160641	0.086583		282.2	3.68783	3.17829	2.20536	1.12617	0.507672	0.184582	0.096041		282.2	3.43613	2.57339	1.7013	0.968952	0.44397	0.248203	0.111559
	282.4	2.86621	2.04855	1.06432	0.462644	0.145825	0.160518	0.086364		282.4	3.68864	3.17905	2.20679	1.12731	0.508521	0.185617	0.096331		282.4	3.43699	2.57433	1.70206	0.969218	0.443897	0.24834	0.111532
	282.6	2.86706	2.04974	1.06519	0.463475	0.14607	0.160729	0.087007		282.6	3.68947	3.17971	2.20771	1.12818	0.509085	0.185965	0.097019		282.6	3.43703	2.57448	1.70239	0.96903	0.444019	0.248342	0.111239
	282.8	2.86746	2.05009	1.06603	0.463922	0.146191	0.160358	0.086992		282.8	3.68994	3.18102	2.20878	1.12883	0.510377	0.18664	0.097964		282.8	3.43746	2.57503	1.70304	0.969281	0.443817	0.247884	0.110957
	283	2.8676	2.05052	1.06631	0.463624	0.146119	0.159927	0.086655		283	3.69074	3.18178	2.20971	1.12967	0.51111	0.187604	0.098509		283	3.43774	2.5753	1.70337	0.969329	0.443757	0.24783	0.111094
	283.2	2.86778	2.05098	1.06661	0.46355	0.146499	0.159601	0.086282		283.2	3.69132	3.18225	2.21072	1.13015	0.511559	0.188351	0.098723		283.2	3.43887	2.57589	1.70412	0.969751	0.443809	0.248182	0.110824
	283.4	2.86821	2.05127	1.06763	0.463963	0.146902	0.159329	0.086314		283.4	3.69207	3.1829	2.21132	1.13122	0.512392	0.188939	0.099052		283.4	3.43922	2.57625	1.70435	0.969642	0.443596	0.248078	0.109758
	283.6	2.86906	2.05169	1.06824	0.464338	0.147164	0.158932	0.086378		283.6	3.69285	3.18386	2.21234	1.13207	0.512729	0.189758	0.099435		283.6	3.43926	2.57642	1.7043	0.969485	0.443757	0.248252	0.109653
	283.8	2.86945	2.0522	1.06887	0.46457	0.147281	0.158719	0.086484		283.8	3.69335	3.18458	2.21351	1.13286	0.513796	0.190595	0.099797		283.8	3.44005	2.57693	1.70421	0.969626	0.443877	0.248167	0.109717
	284	2.8698	2.05297	1.06954	0.464701	0.148187	0.158745	0.086648		284	3.69369	3.185	2.21417	1.13328	0.513998	0.191209	0.100109		284	3.44061	2.57767	1.70419	0.969852	0.444062	0.248983	0.11002
	284.2	2.87006	2.05354	1.07022	0.464943	0.148256	0.158704	0.086607		284.2	3.69391	3.1853	2.21412	1.13298	0.513806	0.190997	0.09969		284.2	3.44076	2.57828	1.70425	0.970091	0.444094	0.249303	0.109935
	284.4	2.87079	2.05478	1.07154	0.465356	0.14899	0.159451	0.086978		284.4	3.69334	3.18542	2.21468	1.13331	0.514114	0.190645	0.099513		284.4	3.4407	2.57896	1.70416	0.970564	0.443972	0.249623	0.109428
	284.6	2.87124	2.05539	1.07213	0.465533	0.149345	0.160034	0.087061		284.6	3.69319	3.18528	2.21447	1.13294	0.513383	0.189686	0.099153		284.6	3.44148	2.57969	1.7044	0.97082	0.444604	0.249571	0.109558
	284.8	2.87176	2.05641	1.073	0.465805	0.149732	0.160631	0.087338		284.8	3.69288	3.18546	2.21478	1.13301	0.512981	0.188921	0.098182		284.8	3.4419	2.58021	1.70433	0.970822	0.444518	0.249993	0.109674
	285	2.87233	2.05684	1.07359	0.466743	0.149986	0.161508	0.087626		285	3.693	3.18537	2.21457	1.13289	0.512577	0.188174	0.097469		285	3.44189	2.58013	1.70452	0.970567	0.444091	0.249644	0.110079
	285.2	2.872	2.05739	1.07342	0.466875	0.149721	0.161734	0.087272		285.2	3.69352	3.18552	2.21482	1.1328	0.5122	0.187918	0.096914		285.2	3.4417	2.58076	1.70503	0.970681	0.444364	0.249085	0.109984
	285.4	2.87251	2.05818	1.07404	0.467658	0.149502	0.161846	0.086672		285.4	3.69341	3.18594	2.21525	1.13309	0.51195	0.187422	0.096141		285.4	3.44209	2.58113	1.70566	0.971078	0.444843	0.249761	0.110232
	285.6	2.87293	2.05852	1.07404	0.467642	0.149284	0.161626	0.086752		285.6	3.69412	3.18692	2.2161	1.13378	0.51208	0.187552	0.095996		285.6	3.44228	2.5817	1.70553	0.970611	0.445116	0.249509	0.109883
	285.8	2.87373	2.05951	1.07456	0.468077	0.149413	0.162198	0.086888		285.8	3.69438	3.18746	2.21691	1.13426	0.512018	0.187388	0.095849		285.8	3.44284	2.58196	1.70586	0.971004	0.44559	0.249814	0.110511
	286	2.87429	2.06019	1.07462	0.468115	0.148972	0.162478	0.087271		286	3.69456	3.18766	2.21808	1.13459	0.512324	0.186983	0.095706		286	3.44314	2.5823	1.70579	0.971172	0.445468	0.249361	0.110435
	286.2	2.87497	2.06069	1.07551	0.468591	0.148713	0.163119	0.087588		286.2	3.695	3.18826	2.21893	1.13505	0.513158	0.187105	0.095892		286.2	3.44369	2.5829	1.70638	0.971237	0.445649	0.249239	0.110668
	286.4	2.87563	2.06142	1.07636	0.469092	0.149301	0.162999	0.087945		286.4	3.69543	3.18889	2.21984	1.13596	0.5138	0.187235	0.095609		286.4	3.44424	2.58291	1.70694	0.9708	0.445683	0.249221	0.110816
	286.6	2.876	2.06162	1.07699	0.469333	0.148776	0.162844	0.088024		286.6	3.69631	3.18978	2.22055	1.13657	0.514363	0.187203	0.095909		286.6	3.44443	2.58293	1.70678	0.970323	0.445308	0.248762	0.110862
	286.8	2.87646	2.06178	1.07791	0.468925	0.148502	0.162131	0.087909		286.8	3.6972	3.19035	2.22128	1.13743	0.515345	0.188028	0.096279		286.8	3.44511	2.58346	1.70757	0.970231	0.445298	0.248222	0.110924
	287	2.87701	2.06189	1.0784	0.468652	0.148568	0.161928	0.088261		287	3.698	3.1907	2.22236	1.13864	0.516372	0.188902	0.096634		287	3.44586	2.58408	1.70764	0.969927	0.445625	0.248695	0.111467
	287.2	2.87721	2.06213	1.07871	0.468454	0.149088	0.161274	0.08809		287.2	3.6991	3.1916	2.22366	1.13986	0.516874	0.189422	0.096906		287.2	3.44698	2.58449	1.70808	0.969981	0.445742	0.248732	0.11106
	287.4	2.87818	2.06255	1.07978	0.468835	0.149101	0.161195	0.088138		287.4	3.69989	3.19225	2.22434	1.14057	0.517567	0.190092	0.097529		287.4	3.44751	2.58428	1.70829	0.970467	0.445884	0.24857	0.11094
	287.6	2.87894	2.06318	1.08031	0.468567	0.149216	0.160794	0.088048		287.6	3.70053	3.19292	2.22557	1.14116	0.518061	0.190711	0.097484		287.6	3.44802	2.58437	1.70873	0.970986	0.446151	0.249335	0.111403
	287.8	2.8787	2.06395	1.08103	0.468437	0.149063	0.160878	0.088262		287.8	3.7015	3.19379	2.22669	1.14197	0.519192	0.191373	0.09762		287.8	3.44881	2.58494	1.70885	0.971485	0.446154	0.24921	0.111699
	288	2.87924	2.0651	1.08194	0.468604	0.149911	0.160965	0.088207		288	3.70162	3.19435	2.22744	1.14277	0.51931	0.191564	0.097291		288	3.44922	2.5854	1.70965	0.971812	0.446074	0.249758	0.112135
	288.2	2.87971	2.06613	1.08283	0.468734	0.150178	0.161219	0.088559		288.2	3.70162	3.19501	2.22785	1.14339	0.52001	0.191475	0.097181		288.2	3.44982	2.58594	1.71036	0.973061	0.44666	0.250371	0.1121
	288.4	2.87991	2.06716	1.08346	0.469188	0.150756	0.16193	0.08909		288.4	3.70149	3.19548	2.22871	1.1444	0.520389	0.191265	0.097061		288.4	3.45003	2.58636	1.71028	0.973042	0.446421	0.250004	0.111361
	288.6	2.88016	2.06797	1.08381	0.469696	0.150765	0.162074	0.088995		288.6	3.70242	3.19677	2.22917	1.14492	0.520512	0.191389	0.09775		288.6	3.45103	2.58729	1.71111	0.974134	0.44716	0.250416	0.112389
	288.8	2.88057	2.06842	1.08405	0.469925	0.150808	0.162147	0.089086		288.8	3.70322	3.19796	2.22986	1.14592	0.520947	0.191403	0.097529		288.8	3.45085	2.58777	1.71076	0.974472	0.447285	0.250097	0.112201
	289	2.88133	2.06903	1.08466	0.470744	0.15113	0.162905	0.089271		289	3.70368	3.19852	2.22997	1.1461	0.520882	0.191546	0.097353		289	3.45066	2.58841	1.71151	0.974843	0.447809	0.250291	0.112256
	289.2	2.88104	2.0698	1.08473	0.470525	0.150602	0.162086	0.088484		289.2	3.70368	3.19928	2.23032	1.14633	0.521212	0.19138	0.097604		289.2	3.45049	2.58874	1.71219	0.975504	0.44821	0.250256	0.11202
	289.4	2.88182	2.07036	1.08509	0.470904	0.150571	0.161833	0.088296		289.4	3.70347	3.20012	2.23059	1.14674	0.5214	0.190871	0.097723		289.4	3.4512	2.58955	1.71264	0.976308	0.448682	0.250591	0.112225
	289.6	2.88218	2.0706	1.08503	0.470913	0.150174	0.161695	0.088075		289.6	3.70415	3.20113	2.2315	1.14753	0.521595	0.191068	0.097816		289.6	3.45114	2.58942	1.71207	0.975811	0.448215	0.249807	0.11154
	289.8	2.88298	2.07127	1.08555	0.471803	0.150234	0.162443	0.088138		289.8	3.70483	3.20155	2.23238	1.14799	0.521925	0.191365	0.098367		289.8	3.45128	2.58956	1.71224	0.975917	0.447931	0.249414	0.111357
	290	2.88395	2.07173	1.08638	0.472539	0.150452	0.162597	0.088615		290	3.70543	3.20164	2.23352	1.14876	0.522265	0.191433	0.098752		290	3.45183	2.59063	1.71202	0.976257	0.448069	0.249094	0.111074
	290.2	2.88489	2.07232	1.08721	0.473207	0.150821	0.162809	0.088333		290.2	3.70689	3.20247	2.23491	1.14972	0.522592	0.191955	0.099316		290.2	3.45204	2.59116	1.71214	0.975954	0.448352	0.248834	0.110706
	290.4	2.88561	2.07295	1.08795	0.474016	0.151091	0.162908	0.088872		290.4	3.70736	3.20243	2.23508	1.14993	0.522634	0.191939	0.098851		290.4	3.45253	2.59154	1.71243	0.976207	0.448223	0.248576	0.110948
	290.6	2.88568	2.07342	1.08801	0.474474	0.150962	0.163284	0.088717		290.6	3.70767	3.20257	2.23518	1.14998	0.522626	0.191905	0.099065		290.6	3.45313	2.59253	1.71259	0.976203	0.448266	0.248515	0.111098
	290.8	2.88628	2.07425	1.08877	0.475153	0.151046	0.16341	0.088762		290.8	3.70846	3.2027	2.2357	1.15085	0.522987	0.191873	0.099241		290.8	3.45405	2.59335	1.71344	0.976367	0.448512	0.249251	0.110868
	291	2.8868	2.07476	1.08899	0.475752	0.151317	0.163573	0.088912		291	3.70927	3.20315	2.23669	1.15171	0.523022	0.19205	0.099624		291	3.45518	2.59403	1.71425	0.97675	0.44886	0.249593	0.111455
	291.2	2.88747	2.076	1.08928	0.476302	0.151569	0.163965	0.088827		291.2	3.71007	3.20372	2.23797	1.15186	0.523014	0.192348	0.099957		291.2	3.45618	2.59441	1.71523	0.976893	0.449065	0.249782	0.111583
	291.4	2.88822	2.07692	1.09056	0.476942	0.152001	0.164543	0.089644		291.4	3.71039	3.20401	2.23882	1.15215	0.524006	0.192574	0.100188		291.4	3.45696	2.59469	1.71573	0.977286	0.449183	0.250106	0.111723
	291.6	2.88885	2.0781	1.09129	0.47733	0.15227	0.16482	0.089923		291.6	3.71082	3.20435	2.23973	1.15253	0.524335	0.192657	0.100138		291.6	3.45729	2.59513	1.7162	0.976823	0.449103	0.250448	0.11169
	291.8	2.88861	2.07845	1.09171	0.477301	0.152307	0.164816	0.089718		291.8	3.71053	3.2043	2.23988	1.1528	0.524608	0.192597	0.099394		291.8	3.45747	2.59558	1.7161	0.976354	0.449046	0.250302	0.111885
	292	2.88942	2.07936	1.09238	0.47762	0.152817	0.164891	0.089836		292	3.71002	3.2043	2.24028	1.15315	0.524318	0.192175	0.098689		292	3.45845	2.59613	1.71719	0.976826	0.449356	0.251135	0.112522
	292.2	2.89013	2.08026	1.09331	0.478302	0.153141	0.165182	0.090003		292.2	3.71047	3.20477	2.241	1.15393	0.524784	0.192538	0.098848		292.2	3.45875	2.59657	1.71711	0.977077	0.449544	0.251454	0.112179
	292.4	2.89055	2.08088	1.0939	0.47893	0.153227	0.165426	0.089898		292.4	3.71084	3.20529	2.24192	1.15467	0.525455	0.193087	0.099262		292.4	3.45894	2.59673	1.71692	0.976882	0.448985	0.251244	0.112155
	292.6	2.89093	2.08141	1.09424	0.478822	0.152887	0.165087	0.089949		292.6	3.71121	3.20592	2.24221	1.15483	0.525307	0.192623	0.099095		292.6	3.45927	2.59715	1.71743	0.977324	0.449202	0.251657	0.11234
	292.8	2.89171	2.08185	1.09461	0.478869	0.153016	0.165306	0.089746		292.8	3.71069	3.20624	2.24247	1.15516	0.525205	0.192445	0.098198		292.8	3.45906	2.5971	1.71733	0.977193	0.449028	0.251073	0.111802
	293	2.89221	2.08274	1.09571	0.479225	0.153578	0.165604	0.090033		293	3.71055	3.20672	2.24288	1.15544	0.525361	0.192913	0.097991		293	3.45924	2.59736	1.7176	0.977388	0.449015	0.251468	0.111991
	293.2	2.8923	2.08361	1.09631	0.479171	0.153113	0.164452	0.089504		293.2	3.71095	3.20736	2.24366	1.15662	0.525798	0.193134	0.09794		293.2	3.45957	2.59723	1.71744	0.977602	0.448616	0.250742	0.111576
	293.4	2.89333	2.0837	1.09694	0.479211	0.153156	0.164552	0.089242		293.4	3.71113	3.20804	2.24434	1.15754	0.526342	0.193281	0.09788		293.4	3.46036	2.59779	1.71744	0.977947	0.448724	0.250689	0.11165
	293.6	2.89363	2.08454	1.0982	0.479619	0.153384	0.164794	0.08952		293.6	3.71201	3.20885	2.245	1.15854	0.52682	0.193673	0.098071		293.6	3.45989	2.59771	1.71698	0.977034	0.448098	0.249967	0.111233
	293.8	2.89473	2.08528	1.09901	0.47989	0.153921	0.164778	0.090038		293.8	3.71233	3.20919	2.24586	1.15927	0.527189	0.194152	0.098006		293.8	3.45995	2.59805	1.71722	0.977278	0.448287	0.249374	0.111044
	294	2.89547	2.08577	1.09962	0.479887	0.154195	0.164692	0.089982		294	3.7125	3.20989	2.24659	1.16029	0.527646	0.194372	0.098171		294	3.46016	2.59863	1.71723	0.977725	0.448825	0.249654	0.111735
	294.2	2.8956	2.08603	1.09976	0.479395	0.154178	0.164518	0.089611		294.2	3.71337	3.21039	2.24706	1.16076	0.527888	0.19444	0.098296		294.2	3.45978	2.59883	1.71742	0.977668	0.448904	0.249582	0.111768
	294.4	2.89576	2.08629	1.09994	0.479722	0.154148	0.164438	0.089701		294.4	3.71356	3.21094	2.24762	1.16145	0.52813	0.194737	0.098372		294.4	3.46048	2.59966	1.7182	0.978432	0.448951	0.250131	0.111869
	294.6	2.89594	2.08648	1.10019	0.479884	0.154144	0.164521	0.0892		294.6	3.71399	3.21184	2.24848	1.16262	0.52856	0.194766	0.099079		294.6	3.46172	2.60094	1.71914	0.97912	0.449362	0.250973	0.112212
	294.8	2.89628	2.08693	1.10062	0.479987	0.153964	0.164229	0.089061		294.8	3.71551	3.21331	2.24994	1.16395	0.529676	0.195005	0.100023		294.8	3.46278	2.60201	1.71977	0.979532	0.45013	0.251687	0.112349
	295	2.89675	2.08734	1.10086	0.480005	0.153758	0.163911	0.089099		295	3.71645	3.21454	2.25116	1.16483	0.530404	0.195789	0.100777		295	3.46384	2.60254	1.72036	0.979782	0.450713	0.251718	0.112515
	295.2	2.8972	2.0879	1.10162	0.480227	0.154161	0.164017	0.089437		295.2	3.71678	3.21503	2.2518	1.16516	0.53154	0.195932	0.101536		295.2	3.46441	2.60286	1.7206	0.97987	0.45085	0.252096	0.112405
	295.4	2.89694	2.08847	1.10228	0.48023	0.154659	0.163681	0.089584		295.4	3.71699	3.21535	2.25277	1.16618	0.5324	0.196286	0.101717		295.4	3.46455	2.60336	1.72032	0.980042	0.45116	0.252226	0.111841
	295.6	2.89689	2.08844	1.10221	0.480465	0.154254	0.163398	0.088865		295.6	3.71736	3.21567	2.25344	1.16673	0.53288	0.197115	0.102093		295.6	3.46457	2.6036	1.72029	0.98025	0.451232	0.252172	0.111517
	295.8	2.89688	2.08821	1.10257	0.480226	0.154445	0.162886	0.088822		295.8	3.71784	3.21598	2.25411	1.16754	0.533592	0.197245	0.10231		295.8	3.46472	2.60396	1.72036	0.980378	0.451448	0.252611	0.111462
	296	2.89755	2.08894	1.10326	0.480455	0.154614	0.163115	0.08891		296	3.71839	3.21666	2.2552	1.16813	0.533902	0.19737	0.102859		296	3.46604	2.60481	1.72108	0.98119	0.452376	0.253623	0.112061
	296.2	2.89781	2.0893	1.10385	0.481342	0.154727	0.163506	0.088846		296.2	3.71925	3.21723	2.25613	1.16856	0.534307	0.19775	0.10338		296.2	3.46622	2.60502	1.72095	0.980975	0.452107	0.253344	0.111792
	296.4	2.898	2.08983	1.1043	0.481843	0.15481	0.163606	0.089145		296.4	3.71927	3.21726	2.25655	1.16824	0.534096	0.197349	0.103459		296.4	3.46652	2.60512	1.72101	0.980722	0.451739	0.252819	0.111479
	296.6	2.89845	2.09043	1.10482	0.48233	0.15538	0.164071	0.08917		296.6	3.71915	3.21713	2.2567	1.16787	0.533557	0.196488	0.102416		296.6	3.46663	2.60551	1.72104	0.980391	0.451629	0.252209	0.111054
	296.8	2.89925	2.0912	1.106	0.483482	0.156042	0.164962	0.089519		296.8	3.71979	3.2179	2.25763	1.16857	0.533977	0.196969	0.10272		296.8	3.46691	2.60568	1.72144	0.980462	0.451575	0.251547	0.110896
	297	2.89949	2.09169	1.10667	0.483922	0.156308	0.164893	0.089653		297	3.7201	3.21837	2.25809	1.16853	0.533898	0.197121	0.102579		297	3.46743	2.60654	1.72161	0.980805	0.451664	0.25153	0.110894
	297.2	2.89962	2.09237	1.10705	0.484417	0.155932	0.164717	0.089494		297.2	3.72019	3.21846	2.25827	1.16884	0.533794	0.196709	0.102193		297.2	3.46789	2.60735	1.72213	0.981091	0.45212	0.251401	0.111465
	297.4	2.90036	2.093	1.10783	0.485066	0.156082	0.165469	0.089737		297.4	3.72002	3.21847	2.25801	1.16851	0.533858	0.196034	0.101759		297.4	3.46821	2.60782	1.72298	0.980891	0.452042	0.251232	0.111921
	297.6	2.90074	2.0942	1.10872	0.485511	0.156314	0.165347	0.089943		297.6	3.72003	3.21911	2.2582	1.16874	0.533955	0.196064	0.101374		297.6	3.46819	2.60863	1.7233	0.980645	0.452017	0.251279	0.11236
	297.8	2.90143	2.09442	1.10837	0.485279	0.155847	0.164987	0.089498		297.8	3.72039	3.21965	2.25881	1.16944	0.534127	0.196162	0.10106		297.8	3.46855	2.60954	1.72369	0.980749	0.452299	0.251491	0.11239
	298	2.90178	2.09489	1.10869	0.485118	0.155387	0.165074	0.089058		298	3.72083	3.22026	2.25893	1.16992	0.534286	0.195907	0.101033		298	3.46906	2.6107	1.72415	0.981128	0.452539	0.252192	0.112717
	298.2	2.90206	2.09536	1.10899	0.485084	0.155043	0.164802	0.088731		298.2	3.72151	3.22083	2.25977	1.17035	0.534479	0.195843	0.100835		298.2	3.46977	2.61187	1.72484	0.981512	0.452845	0.252547	0.1127
	298.4	2.90249	2.09587	1.10937	0.485362	0.154648	0.164567	0.088327		298.4	3.72176	3.22177	2.26081	1.17135	0.534905	0.196058	0.100574		298.4	3.47094	2.61304	1.72569	0.982418	0.453328	0.253065	0.113018
	298.6	2.90294	2.09628	1.10987	0.485363	0.154399	0.164416	0.088175		298.6	3.72194	3.22232	2.26128	1.17206	0.53546	0.195932	0.100377		298.6	3.47188	2.61399	1.72621	0.983062	0.453847	0.253267	0.113404
	298.8	2.90312	2.09689	1.11015	0.485282	0.154128	0.163999	0.088032		298.8	3.72227	3.22297	2.26217	1.17271	0.536333	0.196382	0.100179		298.8	3.4726	2.6143	1.72653	0.98347	0.454525	0.25338	0.113549
	299	2.90333	2.09732	1.11037	0.485284	0.153689	0.163537	0.088088		299	3.72194	3.22319	2.26265	1.17336	0.536746	0.196733	0.099602		299	3.47317	2.61426	1.72682	0.983969	0.454714	0.2534	0.113535
	299.2	2.90341	2.09767	1.11091	0.485256	0.153684	0.163282	0.088126		299.2	3.72159	3.22312	2.26336	1.17372	0.53715	0.196783	0.099073		299.2	3.47356	2.61415	1.72723	0.984818	0.455039	0.253514	0.113573
	299.4	2.90325	2.09816	1.11109	0.48515	0.153607	0.163214	0.088119		299.4	3.72159	3.22362	2.26476	1.17449	0.537965	0.197545	0.098637		299.4	3.47379	2.61409	1.7274	0.985679	0.455604	0.253645	0.113454
	299.6	2.90335	2.09799	1.11102	0.485044	0.153221	0.163112	0.088224		299.6	3.72159	3.22399	2.26536	1.17478	0.538405	0.197862	0.098639		299.6	3.47421	2.61385	1.72782	0.986559	0.455767	0.253705	0.113625
	299.8	2.90369	2.09825	1.11165	0.484794	0.153328	0.163012	0.088571		299.8	3.72152	3.22421	2.26633	1.17489	0.538628	0.197672	0.098385		299.8	3.47459	2.61369	1.72833	0.986957	0.456165	0.253987	0.113876
	300.01	2.90748	2.10835	1.11676	0.479261	0.150989	0.156654	0.092005		300	3.72453	3.22896	2.27867	1.18614	0.54196	0.205171	0.106124		300	3.57334	2.63212	1.72346	0.978201	0.422464	0.007524	0.07647
	300.21	2.90718	2.10845	1.11633	0.479377	0.151148	0.157129	0.092214		300.2	3.72533	3.22886	2.27935	1.18673	0.541538	0.204966	0.105755		300.2	3.5673	2.6266	1.72103	0.976691	0.421634	0.007024	0.075823
	300.41	2.90645	2.10843	1.11586	0.479787	0.151249	0.156936	0.092242		300.4	3.72543	3.22825	2.27944	1.18729	0.540935	0.204908	0.105523		300.4	3.55979	2.61956	1.71715	0.974289	0.42044	0.006181	0.074843
	300.61	2.90587	2.10844	1.1154	0.479628	0.151177	0.156685	0.092168		300.6	3.72606	3.22803	2.27967	1.18774	0.540581	0.205196	0.10576		300.6	3.55185	2.6126	1.71363	0.972137	0.420093	0.006061	0.07507
	300.81	2.90565	2.1086	1.11512	0.480037	0.151507	0.157132	0.092427		300.8	3.72678	3.22681	2.28004	1.18804	0.540154	0.205331	0.105769		300.8	3.54291	2.60446	1.70949	0.97025	0.419382	0.005658	0.074409
	301.01	2.90519	2.10878	1.11494	0.479885	0.151548	0.157005	0.092563		301	3.72724	3.22632	2.28025	1.1886	0.539927	0.205532	0.106143		301	3.53326	2.59596	1.70507	0.967536	0.418772	0.005535	0.074448
	301.21	2.90482	2.10841	1.11449	0.480139	0.15135	0.156918	0.092394		301.2	3.72728	3.22563	2.28015	1.18932	0.539839	0.205825	0.106552		301.2	3.52322	2.58665	1.6999	0.964474	0.417579	0.004992	0.073996
	301.41	2.9044	2.10784	1.1141	0.4798	0.151063	0.156297	0.092016		301.4	3.72745	3.22461	2.28003	1.18974	0.539325	0.205911	0.106304		301.4	3.51353	2.57805	1.69514	0.962196	0.416834	0.005107	0.074015
	301.61	2.90414	2.10758	1.11368	0.479614	0.15084	0.155906	0.091469		301.6	3.7275	3.22402	2.28021	1.19046	0.53926	0.206258	0.106685		301.6	3.50343	2.56889	1.68945	0.958712	0.415715	0.004749	0.073595
	301.81	2.90416	2.10744	1.11343	0.479757	0.150811	0.155707	0.090964		301.8	3.72797	3.22376	2.28026	1.19094	0.539302	0.206687	0.107265		301.8	3.494	2.56016	1.68356	0.955776	0.414381	0.004171	0.073176
	302.01	2.90386	2.10695	1.11282	0.479148	0.150784	0.155359	0.090645		302	3.72745	3.2229	2.2801	1.19089	0.539448	0.206962	0.107526		302	3.48546	2.55249	1.67845	0.953634	0.414194	0.004024	0.072813
	302.21	2.90374	2.10658	1.11254	0.478882	0.150883	0.154764	0.090148		302.2	3.727	3.22228	2.27983	1.19107	0.539611	0.207035	0.107658		302.2	3.47754	2.54532	1.67311	0.951295	0.413435	0.003389	0.072485
	302.41	2.90347	2.10581	1.11144	0.478378	0.150461	0.153873	0.08925		302.4	3.726	3.22116	2.27847	1.19036	0.538815	0.206504	0.107015		302.4	3.47083	2.53824	1.66865	0.949069	0.413346	0.002499	0.072691
	302.61	2.90346	2.1061	1.11143	0.478775	0.150686	0.153804	0.088873		302.6	3.72552	3.22038	2.27783	1.18949	0.538224	0.205923	0.107128		302.6	3.4639	2.53127	1.66382	0.946626	0.412489	0.002174	0.072358
	302.81	2.90313	2.10632	1.11126	0.478833	0.151014	0.154042	0.089247		302.8	3.72543	3.21979	2.27763	1.18939	0.538191	0.205689	0.107647		302.8	3.45849	2.52499	1.65966	0.944295	0.412315	0.002026	0.072319
	303.01	2.90277	2.10623	1.11099	0.478373	0.151094	0.153787	0.089052		303	3.72476	3.21898	2.27714	1.18871	0.537797	0.205278	0.107348		303	3.4528	2.51895	1.65609	0.941741	0.412136	0.001465	0.071848
	303.21	2.90222	2.10597	1.11091	0.478215	0.151147	0.153512	0.088982		303.2	3.72444	3.21903	2.27697	1.18848	0.537667	0.204879	0.107583		303.2	3.44688	2.51253	1.65246	0.939438	0.411643	0.000654	0.071127
	303.41	2.90134	2.10596	1.11071	0.478212	0.151014	0.152719	0.088885		303.4	3.72478	3.21897	2.27714	1.18872	0.537859	0.205462	0.10816		303.4	3.44125	2.50629	1.64792	0.937235	0.411324	0.000242	0.071161
	303.61	2.901	2.10597	1.11084	0.477987	0.151299	0.152405	0.08918		303.6	3.72488	3.21849	2.27685	1.18866	0.538277	0.205599	0.108072		303.6	3.43606	2.49995	1.64344	0.93479	0.410789	-0.0008	0.070477
	303.81	2.90069	2.1063	1.11131	0.477927	0.151434	0.151833	0.089407		303.8	3.72507	3.21848	2.27728	1.1886	0.538549	0.205695	0.107775		303.8	3.43095	2.49414	1.63956	0.932998	0.41024	-0.0014	0.070592
	304.01	2.90004	2.10596	1.11129	0.477859	0.151733	0.151301	0.089295		304	3.72502	3.21858	2.27706	1.18836	0.538264	0.205741	0.107508		304	3.42524	2.48842	1.6354	0.929935	0.409457	-0.0025	0.070276
	304.21	2.90004	2.10557	1.11088	0.477817	0.151718	0.150672	0.08908		304.2	3.72477	3.21855	2.27736	1.18827	0.539007	0.205884	0.107815		304.2	3.42106	2.48326	1.63208	0.927916	0.408489	-0.00353	0.069741
	304.41	2.8999	2.10521	1.11097	0.478008	0.151541	0.150227	0.089408		304.4	3.72485	3.21848	2.27729	1.18842	0.53908	0.20664	0.107931		304.4	3.41627	2.47812	1.62802	0.925816	0.407961	-0.00409	0.070031
	304.61	2.89994	2.10496	1.1113	0.477529	0.151317	0.15005	0.089087		304.6	3.72529	3.21818	2.2774	1.18821	0.539416	0.207295	0.107961		304.6	3.41179	2.47387	1.62456	0.924104	0.408013	-0.00429	0.070931
	304.81	2.89991	2.10498	1.11167	0.477561	0.151234	0.15006	0.089574		304.8	3.72537	3.21755	2.27746	1.18817	0.539763	0.207464	0.108158		304.8	3.40719	2.46858	1.62073	0.922104	0.407483	-0.0049	0.070599
	305.01	2.89972	2.10469	1.11182	0.477503	0.150953	0.150064	0.089881		305	3.72579	3.21828	2.27814	1.18897	0.540716	0.208447	0.108573		305	3.40283	2.46345	1.61698	0.919133	0.406592	-0.00513	0.070557
	305.21	2.89975	2.10403	1.11178	0.477631	0.150765	0.150043	0.090373		305.2	3.72581	3.21773	2.27824	1.18945	0.541185	0.208918	0.108415		305.2	3.39874	2.45874	1.61335	0.917087	0.405492	-0.00541	0.070534
	305.41	2.89957	2.10375	1.11186	0.477113	0.150213	0.149652	0.090537		305.4	3.72621	3.21726	2.27862	1.19004	0.540918	0.208967	0.107947		305.4	3.39504	2.45509	1.61008	0.915743	0.404898	-0.00536	0.070661
	305.61	2.89922	2.1032	1.11149	0.476899	0.14962	0.149824	0.090064		305.6	3.72659	3.21766	2.27962	1.19102	0.541556	0.209503	0.108313		305.6	3.39104	2.45042	1.60602	0.913379	0.403975	-0.00598	0.07002
	305.81	2.89899	2.10281	1.11111	0.476753	0.149401	0.150135	0.08972		305.8	3.72662	3.21729	2.27944	1.19081	0.541539	0.209159	0.10817		305.8	3.38674	2.44581	1.60222	0.911354	0.402499	-0.0066	0.069613
	306.01	2.89907	2.103	1.11092	0.476767	0.14996	0.150641	0.090191		306	3.72618	3.21658	2.27975	1.19059	0.541565	0.209101	0.108049		306	3.38325	2.44197	1.59875	0.910076	0.402935	-0.00657	0.069072
	306.21	2.89803	2.10249	1.11004	0.476409	0.149451	0.149865	0.089468		306.2	3.72587	3.21579	2.27932	1.19011	0.540996	0.208196	0.106981		306.2	3.37896	2.43686	1.59489	0.907824	0.401855	-0.0074	0.068357
	306.41	2.89717	2.10186	1.10892	0.475724	0.148729	0.149249	0.088697		306.4	3.7251	3.215	2.27838	1.18915	0.540548	0.207711	0.106253		306.4	3.37627	2.43344	1.59209	0.906389	0.401923	-0.00702	0.068371
	306.61	2.89731	2.1017	1.1089	0.476066	0.14909	0.14959	0.08875		306.6	3.72594	3.21506	2.27917	1.18902	0.540959	0.207371	0.106242		306.6	3.3728	2.42936	1.5887	0.904584	0.401256	-0.00637	0.068158
	306.81	2.89659	2.10102	1.10842	0.47533	0.14916	0.149108	0.08813		306.8	3.7263	3.21454	2.27924	1.189	0.541138	0.207369	0.105977		306.8	3.36944	2.42518	1.58562	0.90272	0.400682	-0.00667	0.06772
	307.01	2.89637	2.10036	1.10814	0.475201	0.149141	0.148558	0.086899		307	3.72576	3.21402	2.2789	1.189	0.541297	0.207387	0.106577		307	3.36595	2.42135	1.58266	0.901085	0.400382	-0.00627	0.067709
	307.21	2.89628	2.10003	1.10847	0.475431	0.149956	0.149106	0.086772		307.2	3.72621	3.21415	2.27887	1.18922	0.541185	0.206761	0.106743		307.2	3.36234	2.4169	1.5788	0.898887	0.400017	-0.00664	0.067199
	307.41	2.89595	2.10001	1.10851	0.475612	0.150453	0.148986	0.086325		307.4	3.72564	3.21316	2.27828	1.18872	0.540751	0.206104	0.106186		307.4	3.35912	2.41355	1.57529	0.896939	0.399441	-0.00642	0.067251
	307.61	2.89612	2.10022	1.10855	0.475423	0.150903	0.148735	0.086166		307.6	3.72494	3.21262	2.27746	1.18847	0.540321	0.205871	0.105891		307.6	3.35598	2.40993	1.57242	0.895052	0.3991	-0.00672	0.067319
	307.81	2.89633	2.10017	1.10834	0.475623	0.151061	0.148723	0.086173		307.8	3.72477	3.21274	2.27785	1.18865	0.539796	0.205821	0.105943		307.8	3.35237	2.40669	1.56979	0.893306	0.398549	-0.00733	0.067427
	308.01	2.89614	2.09956	1.10786	0.475379	0.151529	0.14819	0.08636		308	3.72409	3.2123	2.27738	1.18827	0.539631	0.205328	0.105779		308	3.34904	2.4035	1.5669	0.891576	0.398464	-0.0079	0.068153
	308.21	2.8965	2.09907	1.10819	0.475266	0.151899	0.14806	0.086057		308.2	3.72331	3.21198	2.27731	1.18844	0.539755	0.205723	0.106234		308.2	3.34569	2.39972	1.56362	0.889781	0.397839	-0.0087	0.067625
	308.41	2.89608	2.09874	1.1081	0.475088	0.152038	0.148146	0.086391		308.4	3.72343	3.21139	2.27729	1.18865	0.539279	0.205662	0.105849		308.4	3.34271	2.39677	1.56062	0.888205	0.397549	-0.00888	0.068286
	308.61	2.89583	2.09858	1.10816	0.474254	0.152388	0.147605	0.08613		308.6	3.7231	3.21097	2.27723	1.18822	0.539037	0.205735	0.106198		308.6	3.33953	2.39343	1.55727	0.886374	0.397238	-0.00951	0.068336
	308.81	2.89558	2.09819	1.10822	0.473816	0.152392	0.147402	0.08645		308.8	3.72308	3.21063	2.2772	1.18821	0.538759	0.205999	0.106579		308.8	3.3367	2.38977	1.55474	0.884799	0.396752	-0.01006	0.068425
	309.01	2.89491	2.09775	1.10779	0.472965	0.152763	0.147173	0.086502		309	3.72269	3.20996	2.27742	1.18847	0.538986	0.206389	0.106803		309	3.33349	2.38623	1.55203	0.882963	0.395674	-0.0103	0.067871
	309.21	2.89448	2.09761	1.10741	0.471728	0.152369	0.146841	0.086486		309.2	3.72235	3.20924	2.27715	1.18857	0.538576	0.206399	0.106624		309.2	3.3304	2.38336	1.54997	0.882248	0.39534	-0.01033	0.068795
	309.41	2.8941	2.09751	1.10753	0.47108	0.151718	0.146321	0.085705		309.4	3.7224	3.20937	2.27766	1.18946	0.538599	0.207157	0.107293		309.4	3.32751	2.37966	1.54748	0.880475	0.39459	-0.01087	0.068571
	309.61	2.89356	2.09689	1.10682	0.470003	0.151535	0.145993	0.085021		309.6	3.72276	3.20944	2.27804	1.18988	0.539245	0.207423	0.108041		309.6	3.32461	2.37592	1.54507	0.879134	0.393708	-0.0112	0.068169
	309.81	2.89373	2.0972	1.10696	0.469912	0.151691	0.145881	0.084823		309.8	3.7224	3.20902	2.2779	1.18935	0.539396	0.207401	0.108279		309.8	3.32178	2.37228	1.54266	0.877112	0.392716	-0.01193	0.068033
	310.01	2.89356	2.09702	1.10662	0.469396	0.151597	0.145398	0.084789		310	3.72227	3.20889	2.27799	1.18946	0.539561	0.207722	0.108381		310	3.31981	2.36924	1.54025	0.876417	0.39271	-0.01221	0.067273
	310.21	2.89288	2.09601	1.10591	0.467958	0.150669	0.144474	0.08405		310.2	3.72157	3.20841	2.27697	1.18934	0.539228	0.207318	0.107902		310.2	3.31704	2.36557	1.53795	0.875209	0.391746	-0.01274	0.066881
	310.41	2.8932	2.0955	1.10581	0.467426	0.150463	0.144501	0.083736		310.4	3.72153	3.20847	2.27694	1.18965	0.539647	0.207925	0.107843		310.4	3.31496	2.36247	1.53578	0.873802	0.391029	-0.01285	0.066652
	310.61	2.89308	2.09542	1.10617	0.467488	0.150178	0.144463	0.083202		310.6	3.72114	3.20806	2.27671	1.18932	0.539754	0.207878	0.107963		310.6	3.31233	2.35886	1.53316	0.872632	0.390065	-0.0132	0.066133
	310.81	2.89262	2.09513	1.10604	0.46692	0.150044	0.144029	0.0825		310.8	3.72031	3.20712	2.27654	1.18949	0.539447	0.207633	0.107941		310.8	3.3095	2.35532	1.5302	0.87077	0.388882	-0.01387	0.065355
	311.01	2.89272	2.09495	1.10595	0.467214	0.149993	0.144125	0.082461		311	3.72003	3.20745	2.27645	1.18985	0.539201	0.208023	0.108458		311	3.3074	2.35237	1.52771	0.869125	0.388303	-0.01375	0.065097
	311.21	2.89271	2.09519	1.10641	0.467638	0.150008	0.144463	0.082713		311.2	3.71949	3.20697	2.2754	1.18909	0.538409	0.20724	0.107713		311.2	3.30468	2.34894	1.52471	0.867043	0.387448	-0.0144	0.064243
	311.41	2.89229	2.09523	1.10608	0.467525	0.149686	0.144325	0.082459		311.4	3.71909	3.20655	2.27499	1.18888	0.538163	0.206855	0.107137		311.4	3.30245	2.34609	1.52227	0.865422	0.386222	-0.01452	0.06369
	311.61	2.89244	2.09575	1.1061	0.468071	0.149901	0.144612	0.082999		311.6	3.71919	3.20689	2.27509	1.1889	0.538304	0.206878	0.107141		311.6	3.29982	2.34242	1.51954	0.863809	0.38559	-0.01498	0.06324
	311.81	2.89231	2.09617	1.10658	0.469015	0.150338	0.145103	0.083634		311.8	3.71906	3.20669	2.2751	1.18874	0.538611	0.206836	0.107386		311.8	3.29721	2.33928	1.51653	0.861635	0.385095	-0.01536	0.062268
	312.01	2.89237	2.09663	1.10717	0.46948	0.151058	0.145432	0.084182		312	3.71914	3.20686	2.27503	1.1883	0.538767	0.206874	0.106903		312	3.29514	2.33658	1.51445	0.860145	0.384581	-0.01563	0.061877
	312.21	2.89134	2.09633	1.10665	0.469412	0.150812	0.144816	0.083499		312.2	3.719	3.20616	2.27459	1.18804	0.538416	0.206774	0.10624		312.2	3.2931	2.33385	1.51133	0.858076	0.383761	-0.01616	0.061169
	312.41	2.89089	2.09651	1.10645	0.469288	0.150879	0.144529	0.083877		312.4	3.71933	3.20594	2.27467	1.18777	0.53837	0.206075	0.106113		312.4	3.29146	2.33118	1.50885	0.856447	0.383633	-0.01631	0.061167
	312.61	2.89047	2.09642	1.10651	0.468846	0.150763	0.143707	0.083381		312.6	3.71947	3.20592	2.27456	1.18723	0.538144	0.206114	0.106051		312.6	3.28923	2.3286	1.50602	0.855039	0.383406	-0.01645	0.06081
	312.81	2.88978	2.09622	1.10609	0.468672	0.150476	0.143128	0.08325		312.8	3.72006	3.20578	2.275	1.1875	0.538516	0.206393	0.105793		312.8	3.28723	2.32619	1.50411	0.853724	0.383167	-0.01655	0.061254
	313.01	2.88928	2.09619	1.1055	0.468264	0.150594	0.142641	0.082906		313	3.72009	3.20577	2.2751	1.18723	0.538931	0.20666	0.105924		313	3.2846	2.3236	1.50162	0.851842	0.382838	-0.01653	0.061145
	313.21	2.88923	2.09619	1.10513	0.468066	0.149992	0.142531	0.08269		313.2	3.7217	3.20632	2.27597	1.18757	0.539404	0.207676	0.106237		313.2	3.28275	2.32146	1.49979	0.851071	0.383083	-0.01605	0.061805
	313.41	2.88955	2.0967	1.10559	0.468359	0.150291	0.141938	0.082828		313.4	3.72232	3.20659	2.27678	1.18764	0.539765	0.208268	0.106781		313.4	3.28078	2.31914	1.49777	0.849663	0.383039	-0.01611	0.061879
	313.61	2.88978	2.0965	1.10539	0.468631	0.150571	0.141757	0.082829		313.6	3.72243	3.20631	2.27645	1.18702	0.539646	0.207762	0.10662		313.6	3.27891	2.31736	1.49585	0.849283	0.383345	-0.01631	0.062071
	313.81	2.89006	2.09601	1.10516	0.468566	0.150164	0.141376	0.082843		313.8	3.72225	3.20585	2.27625	1.18648	0.53956	0.20751	0.105624		313.8	3.27709	2.31552	1.4939	0.848103	0.383196	-0.01647	0.062405
	314.01	2.89059	2.09547	1.10493	0.468076	0.150453	0.141664	0.082792		314	3.7225	3.20551	2.27617	1.18676	0.53942	0.206791	0.105602		314	3.27518	2.31344	1.49203	0.847385	0.383315	-0.01639	0.062418
	314.21	2.89159	2.09524	1.10498	0.467854	0.150834	0.141937	0.083017		314.2	3.72195	3.20514	2.27592	1.18661	0.539176	0.206847	0.105476		314.2	3.27352	2.31095	1.49026	0.846225	0.382766	-0.01701	0.0624
	314.41	2.89153	2.09484	1.10428	0.467531	0.150725	0.141825	0.082974		314.4	3.72176	3.20431	2.27642	1.18629	0.538966	0.206886	0.10489		314.4	3.27177	2.30882	1.48858	0.844931	0.382591	-0.01716	0.062546
	314.61	2.89169	2.09479	1.10445	0.467531	0.150343	0.141798	0.082632		314.6	3.72124	3.20417	2.27708	1.18621	0.538749	0.206793	0.105348		314.6	3.27031	2.30701	1.48657	0.843862	0.382156	-0.01778	0.06289
	314.81	2.89193	2.09457	1.1042	0.46714	0.150297	0.141582	0.082719		314.8	3.72112	3.2036	2.2775	1.18646	0.538412	0.207115	0.105749		314.8	3.26843	2.30458	1.48381	0.842887	0.381304	-0.01831	0.062893
	315.01	2.89223	2.0943	1.1041	0.46675	0.150115	0.141451	0.082676		315	3.72071	3.20319	2.27716	1.18644	0.538283	0.207147	0.105871		315	3.26639	2.30147	1.48187	0.841625	0.380653	-0.01869	0.062674
	315.21	2.89227	2.09408	1.10415	0.466357	0.149978	0.141588	0.082158		315.2	3.72026	3.20276	2.2769	1.18642	0.538197	0.206728	0.10611		315.2	3.26427	2.29874	1.47951	0.840092	0.379408	-0.0188	0.062494
	315.41	2.8921	2.09396	1.10381	0.466184	0.150272	0.141625	0.082317		315.4	3.72023	3.20296	2.2771	1.18635	0.538259	0.206774	0.106158		315.4	3.26217	2.29619	1.47707	0.838641	0.377932	-0.01929	0.061831
	315.61	2.89183	2.09404	1.10393	0.466285	0.15036	0.142179	0.083101		315.6	3.71928	3.20257	2.27638	1.18569	0.537824	0.206402	0.106141		315.6	3.26038	2.29356	1.47535	0.837566	0.377737	-0.0195	0.061424
	315.81	2.89139	2.09392	1.10415	0.465963	0.15043	0.141953	0.082721		315.8	3.71941	3.20252	2.27586	1.18569	0.537754	0.206487	0.106036		315.8	3.25862	2.29142	1.47299	0.836094	0.376876	-0.01995	0.060865
	316.01	2.89138	2.09359	1.10406	0.465578	0.150544	0.141125	0.082057		316	3.71869	3.20205	2.27526	1.18522	0.537239	0.206196	0.105205		316	3.2567	2.28892	1.47074	0.834648	0.376029	-0.0207	0.06033
	316.21	2.89031	2.09344	1.10368	0.465056	0.150099	0.140749	0.081745		316.2	3.71824	3.20155	2.27505	1.18573	0.537383	0.205809	0.105295		316.2	3.25523	2.28729	1.4684	0.833462	0.375967	-0.02066	0.060277
	316.41	2.88967	2.09325	1.10367	0.464895	0.149839	0.140589	0.08172		316.4	3.71834	3.2018	2.275	1.18606	0.537886	0.205705	0.10536		316.4	3.25307	2.28487	1.46595	0.832028	0.375776	-0.02095	0.060035
	316.61	2.88879	2.0932	1.1037	0.464879	0.149351	0.139961	0.081356		316.6	3.71777	3.20153	2.27453	1.1856	0.538311	0.205606	0.105227		316.6	3.25086	2.28281	1.4636	0.830493	0.375291	-0.02147	0.060098
	316.81	2.88785	2.09281	1.10281	0.464762	0.14875	0.139371	0.081085		316.8	3.71748	3.20192	2.2741	1.18576	0.538692	0.206329	0.105712		316.8	3.24924	2.28129	1.46191	0.829579	0.375326	-0.02141	0.06069
	317.01	2.88753	2.09241	1.10289	0.464705	0.148558	0.138832	0.080488		317	3.71701	3.20215	2.27371	1.18557	0.53879	0.206578	0.105545		317	3.24713	2.27914	1.45958	0.828504	0.375131	-0.02127	0.060567
	317.21	2.88729	2.0926	1.10346	0.464796	0.14848	0.13849	0.080375		317.2	3.71721	3.20253	2.27361	1.18597	0.539323	0.206758	0.10619		317.2	3.24533	2.27744	1.45765	0.827634	0.374978	-0.02133	0.060431
	317.41	2.88771	2.09306	1.10459	0.465838	0.149237	0.138876	0.08087		317.4	3.71716	3.20306	2.27398	1.18657	0.539843	0.207205	0.106155		317.4	3.2433	2.27546	1.45552	0.826993	0.374604	-0.02192	0.060702
	317.61	2.8877	2.09255	1.10434	0.465959	0.149092	0.139072	0.08096		317.6	3.71738	3.20299	2.27403	1.18713	0.539647	0.206854	0.105547		317.6	3.2415	2.27377	1.45375	0.825869	0.374644	-0.02201	0.060755
	317.81	2.88781	2.0924	1.10386	0.465638	0.149312	0.139682	0.081434		317.8	3.71734	3.2026	2.2738	1.18744	0.539615	0.206594	0.105471		317.8	3.2399	2.27214	1.45181	0.824957	0.37405	-0.02151	0.060974
	318.01	2.888	2.09224	1.10356	0.465786	0.150044	0.139999	0.081612		318	3.71795	3.20282	2.27461	1.18813	0.53997	0.207128	0.105767		318	3.23867	2.27042	1.45061	0.824008	0.374661	-0.02127	0.061444
	318.21	2.88795	2.09211	1.10326	0.465403	0.150152	0.140108	0.081871		318.2	3.71754	3.2024	2.27476	1.1884	0.53995	0.207734	0.105641		318.2	3.23734	2.26856	1.44876	0.822841	0.373939	-0.0217	0.060706
	318.41	2.88815	2.09227	1.10359	0.465651	0.150306	0.140145	0.081834		318.4	3.71795	3.20254	2.27514	1.18881	0.539788	0.208507	0.105999		318.4	3.23655	2.26677	1.4468	0.822176	0.374146	-0.02108	0.060959
	318.61	2.88816	2.09217	1.1038	0.465375	0.150279	0.140263	0.082073		318.6	3.71773	3.20246	2.27522	1.18903	0.539774	0.208789	0.105809		318.6	3.23487	2.26462	1.44489	0.821015	0.373728	-0.022	0.060743
	318.81	2.88829	2.09217	1.10402	0.465155	0.150532	0.140375	0.082277		318.8	3.71738	3.20196	2.2749	1.18883	0.539443	0.208597	0.105848		318.8	3.2332	2.26185	1.44251	0.82029	0.373034	-0.02258	0.05993
	319.01	2.8881	2.09188	1.10409	0.465137	0.150835	0.140459	0.082082		319	3.71694	3.20202	2.27475	1.18876	0.539153	0.208296	0.105413		319	3.23135	2.25906	1.44103	0.818852	0.372502	-0.02233	0.059643
	319.21	2.88749	2.09149	1.10328	0.464869	0.150784	0.140049	0.082125		319.2	3.71705	3.20188	2.27446	1.18832	0.538548	0.208005	0.104896		319.2	3.22967	2.25686	1.43904	0.817368	0.371242	-0.02289	0.059254
	319.41	2.88771	2.09134	1.104	0.465322	0.151092	0.139963	0.082385		319.4	3.71692	3.20128	2.2738	1.18724	0.537928	0.207564	0.104853		319.4	3.22764	2.25495	1.43699	0.816517	0.370165	-0.02319	0.058727
	319.61	2.88734	2.0907	1.10404	0.465331	0.151032	0.13957	0.082076		319.6	3.71606	3.2004	2.27309	1.1866	0.537117	0.207383	0.104152		319.6	3.2257	2.25282	1.43573	0.815474	0.370047	-0.02303	0.058848
	319.81	2.88722	2.09066	1.10376	0.465324	0.151214	0.139447	0.08215		319.8	3.71596	3.1996	2.27319	1.18606	0.536815	0.207208	0.103369		319.8	3.22334	2.25042	1.43342	0.814292	0.368996	-0.02336	0.058171
	320.01	2.88766	2.09083	1.10385	0.465657	0.151371	0.139512	0.082012		320	3.71545	3.19882	2.27325	1.18569	0.536385	0.206988	0.103614		320	3.22191	2.24844	1.43166	0.814035	0.369343	-0.02311	0.058482
	320.21	2.88694	2.09114	1.10372	0.465506	0.151229	0.139709	0.082263		320.2	3.71551	3.19883	2.27301	1.18528	0.53611	0.206555	0.103657		320.2	3.22031	2.24664	1.43026	0.812845	0.369195	-0.02295	0.058601
	320.41	2.88668	2.09105	1.1034	0.465455	0.150989	0.13963	0.082117		320.4	3.71539	3.19847	2.27231	1.18458	0.536078	0.20652	0.103491		320.4	3.21888	2.24449	1.42841	0.811797	0.368943	-0.02359	0.058487
	320.61	2.88727	2.09139	1.1037	0.465809	0.151328	0.139778	0.081912		320.6	3.71501	3.19845	2.2722	1.1841	0.536504	0.206245	0.104203		320.6	3.21663	2.24224	1.42642	0.810484	0.368356	-0.02433	0.058291
	320.81	2.88682	2.09128	1.10324	0.465516	0.150815	0.138996	0.081418		320.8	3.71463	3.19875	2.27207	1.18434	0.536528	0.206832	0.104705		320.8	3.21584	2.24059	1.42498	0.810064	0.367887	-0.02445	0.058038
	321.01	2.88757	2.09193	1.10426	0.46561	0.151415	0.139672	0.081584		321	3.71471	3.19911	2.27253	1.18473	0.537108	0.207093	0.104843		321	3.2142	2.23832	1.42279	0.808822	0.367072	-0.02518	0.057821
	321.21	2.88755	2.09207	1.10454	0.46518	0.151325	0.139622	0.08146		321.2	3.71549	3.19956	2.27305	1.18529	0.53793	0.207621	0.10617		321.2	3.2125	2.2363	1.42047	0.807142	0.366015	-0.02579	0.05783
	321.41	2.88785	2.09204	1.10458	0.465223	0.151277	0.139914	0.082084		321.4	3.71573	3.19947	2.27374	1.18554	0.538388	0.208194	0.106258		321.4	3.21143	2.23452	1.41877	0.806137	0.365331	-0.02613	0.05777
	321.61	2.88752	2.09202	1.10403	0.464745	0.151192	0.139765	0.082247		321.6	3.71617	3.19967	2.27399	1.18586	0.538488	0.208491	0.106794		321.6	3.21003	2.23308	1.41725	0.805096	0.365093	-0.0256	0.058361
	321.81	2.88751	2.09223	1.10381	0.464657	0.151685	0.140087	0.08268		321.8	3.7164	3.19972	2.27394	1.18592	0.53878	0.209033	0.107608		321.8	3.2085	2.23106	1.41507	0.803635	0.364526	-0.02554	0.0583
	322.01	2.8872	2.0916	1.10362	0.464579	0.151695	0.139877	0.082514		322	3.71706	3.20013	2.2744	1.18629	0.539658	0.209859	0.108368		322	3.20805	2.2299	1.41384	0.802983	0.365027	-0.02539	0.059057
	322.21	2.88748	2.09186	1.10455	0.464769	0.151544	0.14018	0.082828		322.2	3.71689	3.20017	2.2743	1.1864	0.539928	0.209873	0.108719		322.2	3.2072	2.22846	1.41235	0.801897	0.364438	-0.02565	0.058704
	322.41	2.88795	2.09222	1.10515	0.465406	0.151492	0.139874	0.083172		322.4	3.71629	3.19998	2.27344	1.18596	0.539606	0.209471	0.108226		322.4	3.20651	2.22682	1.41091	0.801087	0.364332	-0.02587	0.059233
	322.61	2.88776	2.09237	1.10538	0.465386	0.151257	0.139695	0.083759		322.6	3.71613	3.19997	2.27294	1.18585	0.539888	0.209147	0.107785		322.6	3.20481	2.22545	1.40937	0.799759	0.364011	-0.02668	0.058808
	322.81	2.88728	2.09227	1.10513	0.465362	0.151	0.139224	0.083462		322.8	3.7168	3.20072	2.27344	1.18601	0.540375	0.209077	0.108027		322.8	3.20375	2.22317	1.40762	0.798682	0.363103	-0.02706	0.058668
	323.01	2.88637	2.09139	1.10437	0.465274	0.150653	0.138344	0.08311		323	3.71669	3.20062	2.27298	1.18607	0.540131	0.208661	0.107816		323	3.20204	2.22106	1.40541	0.796866	0.362053	-0.02746	0.058608
	323.21	2.88646	2.09099	1.10468	0.465588	0.150642	0.138086	0.083202		323.2	3.71682	3.20002	2.27231	1.18569	0.54	0.208088	0.107546		323.2	3.20008	2.21938	1.40334	0.794779	0.361401	-0.02815	0.058187
	323.41	2.88622	2.09048	1.10495	0.465638	0.150308	0.137564	0.082896		323.4	3.71679	3.19955	2.27255	1.1857	0.539724	0.207876	0.107116		323.4	3.19846	2.21781	1.40188	0.793384	0.360691	-0.02821	0.057957
	323.61	2.88569	2.09004	1.10423	0.465814	0.150077	0.136987	0.08272		323.6	3.71595	3.19898	2.27272	1.18559	0.539443	0.207561	0.106485		323.6	3.19666	2.21599	1.40025	0.792185	0.360713	-0.02844	0.058017
	323.81	2.88588	2.0903	1.10416	0.466085	0.150487	0.13772	0.083321		323.8	3.71612	3.19843	2.27269	1.18527	0.5387	0.207262	0.106117		323.8	3.19532	2.21403	1.39804	0.790919	0.360213	-0.02897	0.057329
	324.01	2.88612	2.09003	1.10406	0.46556	0.150526	0.137299	0.083163		324	3.71651	3.19871	2.2732	1.18582	0.53835	0.207153	0.106135		324	3.19466	2.21232	1.39679	0.789989	0.360266	-0.02902	0.057463
	324.21	2.88578	2.08971	1.10393	0.465526	0.150902	0.137258	0.08302		324.2	3.71616	3.19825	2.27263	1.18537	0.537554	0.206284	0.105646		324.2	3.19313	2.21052	1.39501	0.788167	0.359425	-0.02957	0.056445
	324.41	2.88567	2.08914	1.10349	0.465636	0.151128	0.137244	0.083018		324.4	3.7158	3.19757	2.27245	1.18551	0.537777	0.206076	0.105389		324.4	3.19243	2.20978	1.39392	0.787727	0.359852	-0.02992	0.055936
	324.61	2.88524	2.08914	1.10303	0.464947	0.150843	0.136971	0.082766		324.6	3.71574	3.19742	2.27263	1.18554	0.537939	0.206146	0.105069		324.6	3.19082	2.20816	1.39248	0.787041	0.359492	-0.03004	0.056103
	324.81	2.88494	2.08914	1.10316	0.464656	0.150842	0.136769	0.082502		324.8	3.71474	3.19691	2.27212	1.18518	0.537672	0.206102	0.104949		324.8	3.19046	2.20689	1.39176	0.786444	0.359578	-0.03006	0.056493
	325.01	2.88442	2.0885	1.10245	0.463988	0.150953	0.136639	0.082405		325	3.71499	3.19707	2.27216	1.18544	0.538456	0.206891	0.105147		325	3.18925	2.20558	1.39082	0.785536	0.359198	-0.02997	0.056594
	325.21	2.88365	2.08767	1.10175	0.463193	0.15045	0.136037	0.081948		325.2	3.71483	3.19667	2.27201	1.18524	0.538661	0.206884	0.105085		325.2	3.18881	2.20499	1.39053	0.78558	0.359523	-0.02871	0.057339
	325.41	2.88345	2.08763	1.102	0.463789	0.150769	0.136237	0.081875		325.4	3.71412	3.19649	2.27171	1.18496	0.5387	0.20726	0.105454		325.4	3.18803	2.20413	1.38973	0.785086	0.359448	-0.02864	0.057394
	325.61	2.88276	2.08753	1.10183	0.463601	0.151099	0.13633	0.081354		325.6	3.71438	3.19658	2.27154	1.1848	0.538588	0.207585	0.105801		325.6	3.18699	2.20323	1.38897	0.785408	0.359479	-0.02767	0.058288
	325.81	2.88277	2.0877	1.10172	0.463717	0.151142	0.136802	0.081185		325.8	3.71445	3.19616	2.27154	1.18442	0.538641	0.207496	0.106055		325.8	3.18677	2.20272	1.38873	0.784998	0.359908	-0.02729	0.058763
	326.01	2.88286	2.08761	1.10201	0.463852	0.151037	0.136598	0.080731		326	3.71428	3.19612	2.27165	1.1844	0.539022	0.207883	0.106827		326	3.18651	2.20184	1.38843	0.785271	0.359941	-0.02702	0.059783
	326.21	2.88273	2.08803	1.10272	0.464249	0.150862	0.136795	0.080702		326.2	3.71403	3.19596	2.27212	1.1842	0.539121	0.20719	0.10602		326.2	3.18498	2.20077	1.38747	0.784454	0.35933	-0.0271	0.059728
	326.41	2.88298	2.08855	1.10306	0.46457	0.151259	0.137036	0.080651		326.4	3.71348	3.19576	2.27186	1.1842	0.538938	0.206866	0.105744		326.4	3.18335	2.19899	1.38604	0.783866	0.358467	-0.02769	0.059774
	326.61	2.88223	2.08847	1.10252	0.46392	0.150987	0.136638	0.080145		326.6	3.71429	3.19623	2.27233	1.18483	0.539459	0.207498	0.106005		326.6	3.18184	2.19703	1.38433	0.782771	0.358016	-0.0279	0.059559
	326.81	2.88197	2.08867	1.10237	0.463605	0.151178	0.136891	0.079839		326.8	3.71415	3.19578	2.27259	1.18474	0.539002	0.207271	0.105544		326.8	3.18034	2.19534	1.38288	0.781851	0.357516	-0.02795	0.059599
	327.01	2.88221	2.08872	1.10221	0.463751	0.151128	0.137056	0.079683		327	3.71451	3.19568	2.27335	1.18519	0.538981	0.207405	0.105995		327	3.17826	2.19272	1.38037	0.779677	0.356455	-0.02883	0.058497
	327.21	2.88264	2.08907	1.10275	0.46409	0.151389	0.137305	0.080298		327.2	3.71467	3.19522	2.27342	1.18505	0.53878	0.207173	0.10563		327.2	3.17649	2.19098	1.37924	0.77844	0.356055	-0.02874	0.058377
	327.41	2.88255	2.08946	1.10259	0.464087	0.151349	0.137156	0.080044		327.4	3.71431	3.19492	2.27368	1.1852	0.538469	0.207067	0.105419		327.4	3.1747	2.18876	1.37742	0.777389	0.355419	-0.02934	0.057805
	327.61	2.88265	2.08959	1.10243	0.464338	0.151604	0.137039	0.080526		327.6	3.71432	3.19517	2.27431	1.18546	0.538596	0.207313	0.105681		327.6	3.1729	2.18699	1.37514	0.776264	0.354755	-0.02979	0.057485
	327.81	2.88305	2.0897	1.10253	0.464141	0.152032	0.137528	0.080732		327.8	3.71415	3.19493	2.27391	1.18559	0.538205	0.207474	0.105516		327.8	3.1711	2.18499	1.37278	0.774395	0.35351	-0.03057	0.056603
	328.01	2.88312	2.08962	1.1026	0.463679	0.151856	0.137167	0.080971		328	3.71362	3.19474	2.27374	1.18563	0.537946	0.206761	0.104908		328	3.1698	2.18299	1.37125	0.773341	0.352705	-0.0309	0.055619
	328.21	2.88255	2.08924	1.1022	0.463622	0.151691	0.136664	0.080993		328.2	3.71322	3.19368	2.27295	1.1849	0.537845	0.206009	0.104542		328.2	3.16821	2.18168	1.36902	0.772008	0.352486	-0.03152	0.055075
	328.41	2.88244	2.08874	1.10173	0.462725	0.151496	0.135767	0.080753		328.4	3.71257	3.19284	2.27225	1.18415	0.537803	0.205849	0.103983		328.4	3.1671	2.18052	1.36787	0.771445	0.352995	-0.03164	0.055544
	328.61	2.88209	2.08847	1.10123	0.461945	0.150877	0.134947	0.080609		328.6	3.71232	3.19284	2.27174	1.18407	0.537644	0.206016	0.103574		328.6	3.16582	2.17914	1.36666	0.770818	0.352514	-0.03157	0.055488
	328.81	2.8815	2.08723	1.10067	0.461564	0.15062	0.134348	0.080729		328.8	3.7124	3.19265	2.27176	1.18399	0.53785	0.205659	0.103866		328.8	3.16434	2.17775	1.36515	0.769957	0.352033	-0.0322	0.055529
	329.01	2.88104	2.08656	1.10038	0.461163	0.150357	0.133867	0.080412		329	3.71248	3.19256	2.27172	1.18394	0.538079	0.206121	0.103907		329	3.16313	2.17692	1.36404	0.76949	0.351716	-0.03219	0.055103
	329.21	2.88066	2.08618	1.09985	0.460686	0.149953	0.133758	0.079989		329.2	3.71261	3.19245	2.27186	1.18408	0.537878	0.205871	0.103775		329.2	3.16273	2.17608	1.363	0.76948	0.352057	-0.03156	0.055695
	329.41	2.88051	2.08607	1.09983	0.46071	0.149708	0.13352	0.07952		329.4	3.71282	3.19211	2.27184	1.18441	0.537919	0.206155	0.104253		329.4	3.16189	2.17478	1.36178	0.768838	0.351824	-0.03183	0.055592
	329.61	2.88047	2.08594	1.0997	0.460266	0.149455	0.132955	0.079344		329.6	3.71332	3.19196	2.27182	1.18439	0.53836	0.205837	0.104053		329.6	3.16096	2.17339	1.36079	0.76835	0.351576	-0.0319	0.05565
	329.81	2.88048	2.08554	1.09957	0.460272	0.149351	0.132622	0.079255		329.8	3.71343	3.19183	2.2723	1.18447	0.538653	0.206041	0.104695		329.8	3.1605	2.17241	1.35984	0.767585	0.351313	-0.03204	0.055717
	330.01	2.88037	2.08541	1.09942	0.459619	0.149153	0.132098	0.079282		330	3.71358	3.19177	2.27309	1.18511	0.539127	0.206344	0.105087		330	3.15928	2.17077	1.3583	0.766512	0.350861	-0.03259	0.055732
	330.21	2.87989	2.08549	1.0996	0.459863	0.148896	0.132209	0.078855		330.2	3.71334	3.19138	2.27323	1.18473	0.538837	0.205398	0.104505		330.2	3.15793	2.16979	1.35623	0.765495	0.350205	-0.03291	0.0554
	330.41	2.87948	2.08516	1.09882	0.459467	0.148407	0.131528	0.078195		330.4	3.71299	3.19088	2.27334	1.18501	0.538717	0.205546	0.104357		330.4	3.15716	2.16833	1.35502	0.764887	0.350151	-0.0331	0.05554
	330.61	2.8789	2.08523	1.09845	0.458916	0.148072	0.131665	0.077976		330.6	3.71276	3.19044	2.27321	1.18489	0.538334	0.205712	0.103972		330.6	3.15604	2.16684	1.35331	0.76372	0.349757	-0.03324	0.0552
	330.81	2.87904	2.08572	1.09886	0.458916	0.14811	0.131871	0.077775		330.8	3.71239	3.19041	2.27319	1.18489	0.537696	0.205983	0.104045		330.8	3.15529	2.16599	1.35196	0.76319	0.349739	-0.03321	0.054781
	331.01	2.87904	2.08577	1.09864	0.458663	0.14792	0.13252	0.077739		331	3.71249	3.19019	2.27351	1.18474	0.538278	0.206171	0.104753		331	3.15379	2.16391	1.35048	0.762208	0.348832	-0.03348	0.054421
	331.21	2.87921	2.08608	1.09922	0.458934	0.148314	0.132963	0.077978		331.2	3.71165	3.18997	2.27308	1.18476	0.538036	0.205895	0.104357		331.2	3.15287	2.16275	1.34884	0.761418	0.348121	-0.03353	0.054581
	331.41	2.87925	2.08663	1.09973	0.459519	0.148559	0.133391	0.077574		331.4	3.71107	3.18998	2.2726	1.18469	0.538033	0.206131	0.10455		331.4	3.15188	2.16145	1.34688	0.760469	0.347603	-0.03441	0.054331
	331.61	2.87928	2.0862	1.09988	0.459308	0.148753	0.133317	0.077766		331.6	3.71098	3.19001	2.27295	1.18475	0.538516	0.206481	0.104522		331.6	3.15138	2.16088	1.34574	0.759815	0.34711	-0.03471	0.054545
	331.81	2.87938	2.08627	1.10028	0.45916	0.148831	0.133353	0.077132		331.8	3.71035	3.18971	2.2725	1.18431	0.538623	0.206125	0.104428		331.8	3.15065	2.15955	1.34414	0.758771	0.346734	-0.03491	0.054379
	332.01	2.87912	2.08623	1.10061	0.459006	0.14852	0.132799	0.076834		332	3.71048	3.19019	2.27243	1.1841	0.538736	0.206454	0.104747		332	3.1496	2.15826	1.34255	0.757876	0.346638	-0.03501	0.054181
	332.21	2.87914	2.08624	1.10051	0.459021	0.148559	0.132595	0.076568		332.2	3.71044	3.18979	2.2719	1.18361	0.538756	0.206556	0.105094		332.2	3.14915	2.15744	1.34133	0.757033	0.346756	-0.03502	0.054846
	332.41	2.87934	2.08581	1.10053	0.458864	0.149027	0.132236	0.076505		332.4	3.71049	3.19002	2.27216	1.18368	0.538801	0.206843	0.105435		332.4	3.14841	2.15606	1.33951	0.756264	0.346543	-0.03522	0.054844
	332.61	2.87927	2.08526	1.1006	0.459293	0.148951	0.132092	0.076718		332.6	3.71097	3.19065	2.27243	1.18453	0.539627	0.207189	0.106049		332.6	3.14738	2.15464	1.33802	0.75529	0.345848	-0.03571	0.054256
	332.81	2.8788	2.08451	1.10069	0.459274	0.148892	0.131901	0.076884		332.8	3.7112	3.19116	2.27286	1.18487	0.539915	0.207441	0.106288		332.8	3.14663	2.15391	1.33693	0.7547	0.346096	-0.03541	0.054777
	333.01	2.87901	2.08456	1.10088	0.459386	0.14954	0.131897	0.076524		333	3.71146	3.19174	2.27317	1.1853	0.54048	0.208144	0.106258		333	3.14589	2.15346	1.33641	0.754422	0.346248	-0.0348	0.05523
	333.21	2.87888	2.08428	1.10052	0.459037	0.149395	0.131488	0.076373		333.2	3.71217	3.1921	2.27299	1.18597	0.540771	0.208667	0.106501		333.2	3.14537	2.15233	1.33599	0.753774	0.346195	-0.03476	0.05577
	333.41	2.87919	2.08464	1.10081	0.459259	0.149573	0.131528	0.076868		333.4	3.71193	3.19194	2.27266	1.18569	0.540784	0.208651	0.106461		333.4	3.14433	2.15142	1.33533	0.753263	0.346291	-0.03447	0.055791
	333.61	2.8795	2.08454	1.10088	0.459184	0.149674	0.13116	0.077462		333.6	3.71237	3.19236	2.27311	1.18546	0.541058	0.208559	0.106286		333.6	3.14258	2.14971	1.33397	0.751813	0.345598	-0.03488	0.055369
	333.81	2.87973	2.08453	1.10105	0.459578	0.149962	0.131324	0.07779		333.8	3.71193	3.19168	2.27282	1.18495	0.540312	0.208405	0.10649		333.8	3.14164	2.14894	1.3335	0.751309	0.345602	-0.0348	0.055427
	334.01	2.87882	2.08494	1.10057	0.459404	0.149651	0.131022	0.078117		334	3.71224	3.19149	2.27328	1.18532	0.540556	0.208249	0.10608		334	3.14035	2.14729	1.33242	0.750242	0.345402	-0.03507	0.055906
	334.21	2.87821	2.08507	1.10055	0.45977	0.149609	0.131235	0.077691		334.2	3.71217	3.19098	2.27324	1.1848	0.540467	0.207544	0.105571		334.2	3.13851	2.14586	1.33066	0.748893	0.34432	-0.03562	0.055306
	334.41	2.87773	2.0846	1.10001	0.459499	0.149433	0.131128	0.077397		334.4	3.71178	3.19064	2.2733	1.18495	0.540488	0.208241	0.105482		334.4	3.13713	2.14435	1.32954	0.748191	0.343942	-0.03588	0.055492
	334.61	2.87714	2.08465	1.09994	0.459298	0.149795	0.1317	0.078029		334.6	3.71096	3.18993	2.27261	1.18453	0.539379	0.208032	0.104614		334.6	3.13528	2.14244	1.32815	0.746866	0.342883	-0.03672	0.054874
	334.81	2.87669	2.08446	1.0998	0.458866	0.149636	0.131821	0.077888		334.8	3.71048	3.18956	2.27273	1.1843	0.53903	0.208109	0.104621		334.8	3.13436	2.14137	1.3273	0.746513	0.342913	-0.03672	0.054781
	335.01	2.87684	2.08438	1.1	0.459199	0.149686	0.132562	0.077927		335	3.7103	3.18917	2.27293	1.18411	0.539002	0.208014	0.104929		335	3.13279	2.13969	1.32632	0.745547	0.342056	-0.03698	0.054487
	335.21	2.87682	2.08441	1.10008	0.459785	0.149669	0.132583	0.077537		335.2	3.71021	3.18937	2.27343	1.18465	0.539037	0.208551	0.104728		335.2	3.13203	2.13865	1.32549	0.744707	0.341835	-0.03763	0.054351
	335.41	2.87704	2.08415	1.10062	0.459966	0.149666	0.132914	0.077036		335.4	3.70992	3.18849	2.27268	1.18398	0.538461	0.208225	0.1044		335.4	3.13188	2.13808	1.3255	0.744819	0.341928	-0.03784	0.054903
	335.61	2.87703	2.0835	1.1008	0.459227	0.14955	0.132632	0.076659		335.6	3.7099	3.18845	2.27271	1.18392	0.538501	0.208416	0.104655		335.6	3.13108	2.13717	1.32519	0.744169	0.341892	-0.03782	0.054991
	335.81	2.87672	2.08373	1.10092	0.459279	0.14936	0.132828	0.076062		335.8	3.7096	3.18851	2.2723	1.18354	0.538087	0.208109	0.10465		335.8	3.13002	2.13553	1.32379	0.743341	0.34157	-0.0379	0.054403
	336.01	2.87669	2.08357	1.10077	0.459386	0.149272	0.132855	0.075791		336	3.71013	3.18889	2.27182	1.18393	0.537777	0.208267	0.105208		336	3.12853	2.13437	1.32218	0.742832	0.341428	-0.03796	0.054142
	336.21	2.87675	2.08364	1.10096	0.459598	0.149901	0.133608	0.076077		336.2	3.70981	3.18835	2.27152	1.18394	0.537621	0.207849	0.105406		336.2	3.12828	2.13321	1.32152	0.742658	0.34162	-0.03772	0.053972
	336.41	2.87693	2.08325	1.10084	0.459173	0.150439	0.133935	0.076189		336.4	3.70977	3.18843	2.27167	1.18415	0.538002	0.208175	0.106126		336.4	3.12775	2.13201	1.31988	0.741896	0.341376	-0.03761	0.053514
	336.61	2.87726	2.08305	1.10121	0.459106	0.15073	0.133772	0.075791		336.6	3.70969	3.18874	2.27178	1.18457	0.538014	0.208327	0.105675		336.6	3.12617	2.1308	1.3185	0.741156	0.341114	-0.03769	0.053376
	336.81	2.87711	2.08319	1.10126	0.458855	0.150972	0.133666	0.076541		336.8	3.70947	3.18908	2.27143	1.18474	0.538232	0.208799	0.105445		336.8	3.12572	2.13068	1.31777	0.7409	0.341182	-0.03718	0.053468
	337.01	2.87755	2.08352	1.10128	0.458629	0.151439	0.133782	0.077064		337	3.7102	3.18902	2.27135	1.18517	0.538552	0.208806	0.105635		337	3.1251	2.12941	1.31659	0.740495	0.340644	-0.03756	0.053393
	337.21	2.87754	2.08383	1.10121	0.457918	0.151177	0.13334	0.077202		337.2	3.71058	3.18903	2.27154	1.18542	0.538657	0.208912	0.105736		337.2	3.12369	2.12786	1.31509	0.739379	0.3401	-0.03869	0.052594
	337.41	2.8779	2.08397	1.10103	0.457704	0.151167	0.133611	0.077541		337.4	3.71029	3.18884	2.27136	1.1852	0.538845	0.20871	0.105569		337.4	3.1225	2.12714	1.31374	0.738924	0.339625	-0.03836	0.052342
	337.61	2.87806	2.0844	1.10072	0.457626	0.151509	0.133297	0.077775		337.6	3.7109	3.18896	2.27174	1.18579	0.539072	0.208651	0.10568		337.6	3.12062	2.12547	1.31183	0.737334	0.338534	-0.03906	0.052027
	337.81	2.87756	2.08454	1.10026	0.45787	0.15188	0.132927	0.077922		337.8	3.7111	3.18867	2.27197	1.18613	0.539408	0.208623	0.105829		337.8	3.11927	2.12394	1.31019	0.736096	0.337963	-0.03967	0.052069
	338.01	2.87628	2.08454	1.10002	0.457884	0.151722	0.132328	0.077803		338	3.71121	3.18849	2.27217	1.18608	0.540005	0.208994	0.105927		338	3.11764	2.12231	1.30793	0.735051	0.33701	-0.04045	0.051913
	338.21	2.87602	2.08417	1.09962	0.457312	0.151925	0.131542	0.078016		338.2	3.71146	3.18817	2.27242	1.18612	0.540408	0.209385	0.10583		338.2	3.11649	2.12119	1.30648	0.734092	0.335999	-0.04112	0.051036
	338.41	2.87612	2.08398	1.09931	0.457378	0.15169	0.130929	0.077884		338.4	3.71127	3.18763	2.27265	1.18618	0.540069	0.209727	0.105837		338.4	3.1158	2.12017	1.30524	0.733776	0.335846	-0.04121	0.051549
	338.61	2.87574	2.08408	1.09938	0.457603	0.15169	0.130352	0.077893		338.6	3.7108	3.18735	2.27245	1.18593	0.539739	0.209415	0.105816		338.6	3.11513	2.11939	1.30482	0.733046	0.336037	-0.04126	0.051687
	338.81	2.87561	2.08407	1.09944	0.457748	0.151322	0.129909	0.078086		338.8	3.71031	3.1871	2.27259	1.18568	0.539426	0.209658	0.106173		338.8	3.11429	2.11859	1.30416	0.73211	0.335912	-0.04121	0.051785
	339.01	2.87607	2.08386	1.09981	0.458239	0.151206	0.129655	0.077949		339	3.7103	3.18729	2.27241	1.1858	0.538903	0.209685	0.106598		339	3.11341	2.11813	1.30316	0.731195	0.335744	-0.04095	0.052048
	339.21	2.87563	2.08298	1.09982	0.458171	0.150872	0.129245	0.07782		339.2	3.71016	3.18706	2.27228	1.18554	0.538912	0.209696	0.106331		339.2	3.11265	2.11748	1.30266	0.730638	0.335602	-0.04094	0.05221
	339.41	2.87568	2.0826	1.0997	0.457776	0.150499	0.129003	0.077635		339.4	3.71013	3.18662	2.27225	1.18532	0.538523	0.209036	0.10595		339.4	3.11206	2.11667	1.30142	0.730086	0.335176	-0.04112	0.052523
	339.61	2.8756	2.08288	1.10011	0.458023	0.150516	0.129371	0.077824		339.6	3.71	3.18659	2.27226	1.18534	0.538376	0.209105	0.106178		339.6	3.1106	2.11598	1.3004	0.729469	0.335351	-0.04095	0.052863
	339.81	2.87551	2.08311	1.10017	0.458732	0.150826	0.129483	0.078034		339.8	3.70943	3.18664	2.27212	1.18486	0.537434	0.208699	0.105923		339.8	3.10969	2.1149	1.29918	0.728883	0.334961	-0.04134	0.052717
	340.01	2.87543	2.08261	1.09992	0.458418	0.151156	0.129837	0.077806		340	3.70949	3.18582	2.27169	1.18439	0.536812	0.207873	0.10515		340	3.10852	2.11422	1.29811	0.728371	0.334902	-0.041	0.053442
	340.21	2.87569	2.08286	1.10058	0.458704	0.151628	0.130716	0.078074		340.2	3.70876	3.18541	2.27212	1.18419	0.536678	0.207621	0.105316		340.2	3.10764	2.11316	1.29723	0.728054	0.334754	-0.04076	0.053798
	340.41	2.87558	2.08302	1.10045	0.458694	0.151499	0.130967	0.077971		340.4	3.70805	3.18489	2.27161	1.18352	0.535708	0.207101	0.104656		340.4	3.10649	2.1118	1.29547	0.726798	0.333887	-0.0416	0.053345
	340.61	2.87486	2.0822	1.10009	0.45808	0.150544	0.130757	0.077371		340.6	3.70789	3.18476	2.2715	1.18319	0.535162	0.20649	0.103599		340.6	3.10533	2.11041	1.29429	0.726105	0.333676	-0.04182	0.053391
	340.81	2.87464	2.082	1.0996	0.457913	0.149958	0.131208	0.077469		340.8	3.70783	3.18474	2.2711	1.18281	0.535225	0.205976	0.104137		340.8	3.10558	2.10972	1.29397	0.725797	0.333408	-0.04173	0.053077
	341.01	2.87443	2.08182	1.09903	0.457511	0.149593	0.130882	0.076902		341	3.70788	3.18463	2.27104	1.18277	0.534915	0.205109	0.103681		341	3.10569	2.10897	1.29316	0.725927	0.333491	-0.04173	0.053122
	341.21	2.87411	2.08154	1.09852	0.456874	0.149523	0.130888	0.076435		341.2	3.70798	3.18462	2.27136	1.18262	0.535519	0.205277	0.103879		341.2	3.1043	2.10816	1.29184	0.725367	0.33347	-0.04208	0.053083
	341.41	2.87421	2.08153	1.09829	0.456866	0.149561	0.131132	0.076126		341.4	3.70766	3.18438	2.27075	1.18197	0.535244	0.204853	0.10352		341.4	3.10369	2.10728	1.29092	0.724508	0.332804	-0.04165	0.053254
	341.61	2.87385	2.08183	1.09798	0.456756	0.1494	0.131116	0.075825		341.6	3.70801	3.18432	2.27065	1.1814	0.53537	0.204862	0.103022		341.6	3.10226	2.10573	1.28961	0.72375	0.3324	-0.04167	0.052984
	341.81	2.87377	2.08155	1.09818	0.456644	0.149405	0.131126	0.075482		341.8	3.70792	3.18352	2.27073	1.18095	0.535825	0.205052	0.102664		341.8	3.10184	2.10446	1.2888	0.723007	0.332364	-0.04163	0.052652
	342.01	2.87341	2.08132	1.09812	0.456316	0.149376	0.130653	0.07513		342	3.70733	3.18283	2.27013	1.18037	0.535802	0.205168	0.102259		342	3.10142	2.10376	1.28774	0.722752	0.332285	-0.04175	0.052465
	342.21	2.87377	2.08154	1.09813	0.456247	0.149496	0.130746	0.075346		342.2	3.70699	3.18271	2.26992	1.18026	0.536116	0.205442	0.102115		342.2	3.1012	2.10284	1.2878	0.722345	0.332306	-0.04158	0.052578
	342.41	2.87404	2.08187	1.09851	0.456673	0.149461	0.131334	0.075314		342.4	3.7067	3.18298	2.27006	1.18056	0.5364	0.205989	0.10265		342.4	3.10028	2.10175	1.2868	0.721719	0.332372	-0.04172	0.053033
	342.61	2.87332	2.08164	1.09837	0.455969	0.149067	0.130408	0.075051		342.6	3.70631	3.18328	2.2693	1.18077	0.536495	0.206208	0.103115		342.6	3.09968	2.10111	1.28656	0.721177	0.332272	-0.04134	0.053248
	342.81	2.87322	2.08174	1.0989	0.456066	0.149025	0.130516	0.075868		342.8	3.70558	3.18302	2.26907	1.18124	0.53684	0.206611	0.103239		342.8	3.09852	2.09978	1.28521	0.719934	0.331634	-0.0417	0.052531
	343.01	2.87327	2.0813	1.09887	0.455934	0.149259	0.13071	0.076294		343	3.70629	3.18378	2.26963	1.18234	0.537688	0.207034	0.10396		343	3.09747	2.09865	1.2836	0.71941	0.331133	-0.04192	0.052288
	343.21	2.87249	2.08075	1.0984	0.455505	0.148955	0.130107	0.076256		343.2	3.70678	3.18448	2.27027	1.183	0.538838	0.208185	0.104368		343.2	3.09613	2.09722	1.28241	0.718838	0.3306	-0.04276	0.052048
	343.41	2.87242	2.08078	1.0979	0.455887	0.149124	0.130009	0.076161		343.4	3.70714	3.18457	2.2705	1.1837	0.539241	0.208726	0.104564		343.4	3.09511	2.09632	1.28163	0.718385	0.330194	-0.04304	0.05234
	343.61	2.87281	2.08098	1.09779	0.456099	0.149759	0.129883	0.076633		343.6	3.70802	3.1848	2.27082	1.18437	0.53954	0.209535	0.104796		343.6	3.09399	2.09543	1.28056	0.717827	0.329912	-0.04321	0.052732
	343.81	2.87246	2.08113	1.09797	0.456206	0.150189	0.129569	0.076688		343.8	3.708	3.18488	2.27078	1.18484	0.539875	0.20925	0.105151		343.8	3.09305	2.09442	1.27968	0.717056	0.329198	-0.04388	0.05274
	344.01	2.87186	2.08078	1.09805	0.455863	0.150181	0.129826	0.076112		344	3.70788	3.18418	2.27056	1.18478	0.540215	0.20926	0.105164		344	3.0916	2.0932	1.27849	0.716629	0.328659	-0.04396	0.052669
	344.21	2.8713	2.08068	1.09807	0.455646	0.149651	0.129579	0.075706		344.2	3.70756	3.1841	2.27108	1.18516	0.540221	0.209136	0.10551		344.2	3.09062	2.09222	1.27754	0.716211	0.328054	-0.04434	0.052879
	344.41	2.8708	2.08045	1.09779	0.455617	0.149225	0.129451	0.074875		344.4	3.70728	3.18378	2.27043	1.18468	0.539532	0.208972	0.105542		344.4	3.09004	2.09134	1.27686	0.715508	0.327709	-0.04448	0.052412
	344.61	2.87109	2.07978	1.09785	0.455502	0.149023	0.129933	0.074257		344.6	3.70793	3.1843	2.27109	1.18484	0.539594	0.209259	0.105898		344.6	3.09018	2.09099	1.27698	0.715683	0.328065	-0.04338	0.053144
	344.81	2.8715	2.08018	1.09778	0.455755	0.149244	0.129958	0.073979		344.8	3.70769	3.18465	2.27142	1.18461	0.539406	0.209177	0.106118		344.8	3.08946	2.09025	1.27617	0.715374	0.327735	-0.04316	0.053152
	345.01	2.87211	2.08074	1.09835	0.456251	0.149984	0.130239	0.073912		345	3.70793	3.18524	2.27187	1.18486	0.539753	0.209504	0.106555		345	3.08864	2.08945	1.27513	0.714745	0.327341	-0.04339	0.052926
	345.21	2.87239	2.0806	1.09858	0.45648	0.150461	0.130618	0.073899		345.2	3.70784	3.18451	2.27163	1.18428	0.539336	0.209478	0.106676		345.2	3.08736	2.08797	1.27334	0.713959	0.326895	-0.04339	0.052691
	345.41	2.87263	2.08064	1.09886	0.456571	0.150391	0.130931	0.073283		345.4	3.70755	3.18397	2.27102	1.18349	0.538342	0.209155	0.105521		345.4	3.08635	2.08672	1.27243	0.713143	0.326345	-0.04356	0.052596
	345.61	2.87297	2.0806	1.09963	0.456918	0.150378	0.131153	0.073254		345.6	3.7077	3.18386	2.27059	1.18295	0.53804	0.209726	0.105298		345.6	3.08563	2.08629	1.27183	0.712746	0.326929	-0.04309	0.052439
	345.81	2.87314	2.08063	1.09962	0.456939	0.150945	0.131274	0.073298		345.8	3.70707	3.18325	2.27056	1.18265	0.537535	0.209573	0.105241		345.8	3.08579	2.08566	1.2709	0.71174	0.327109	-0.04333	0.052473
	346.01	2.87303	2.08079	1.09942	0.456952	0.150928	0.131564	0.074107		346	3.70642	3.18316	2.2704	1.18235	0.537205	0.209649	0.104999		346	3.08488	2.08464	1.26999	0.7107	0.327261	-0.04373	0.052126
	346.21	2.87304	2.08117	1.09998	0.457377	0.150953	0.131928	0.074573		346.2	3.70587	3.18339	2.27026	1.18193	0.536894	0.209766	0.105121		346.2	3.0841	2.08414	1.26972	0.710045	0.327287	-0.04375	0.051664
	346.41	2.8726	2.08072	1.10006	0.456861	0.1509	0.131598	0.075161		346.4	3.7057	3.18301	2.27035	1.18195	0.536582	0.209533	0.104801		346.4	3.08271	2.08285	1.26851	0.708816	0.326738	-0.04429	0.050658
	346.61	2.87228	2.08055	1.0999	0.456804	0.150686	0.131145	0.075451		346.6	3.70541	3.18282	2.26998	1.18157	0.536128	0.20906	0.104177		346.6	3.08167	2.08193	1.26736	0.707519	0.326004	-0.04469	0.050295
	346.81	2.87255	2.0809	1.10064	0.457473	0.151472	0.131487	0.076368		346.8	3.70556	3.18302	2.27055	1.1821	0.536514	0.209327	0.104387		346.8	3.08048	2.0805	1.26566	0.705899	0.325156	-0.0456	0.04937
	347.01	2.87271	2.08089	1.10017	0.457452	0.15197	0.131788	0.076931		347	3.70602	3.18316	2.27082	1.18239	0.536778	0.209361	0.104644		347	3.07969	2.07962	1.26464	0.705184	0.324577	-0.04576	0.049369
	347.21	2.87207	2.08082	1.09925	0.457108	0.15171	0.131366	0.076585		347.2	3.70599	3.18303	2.27053	1.18233	0.537097	0.209727	0.104846		347.2	3.07895	2.079	1.26359	0.704579	0.324364	-0.04603	0.049811
	347.41	2.87168	2.08025	1.09882	0.456647	0.151242	0.130821	0.076497		347.4	3.70643	3.18199	2.2703	1.18221	0.537032	0.209239	0.104393		347.4	3.078	2.07818	1.26254	0.703744	0.324006	-0.04564	0.049994
	347.61	2.87161	2.08047	1.09877	0.456054	0.151108	0.130596	0.076914		347.6	3.70682	3.18162	2.27058	1.18265	0.537342	0.20918	0.104676		347.6	3.07672	2.07664	1.26096	0.702648	0.323466	-0.04651	0.049868
	347.81	2.87055	2.08057	1.09913	0.45549	0.150982	0.130417	0.076392		347.8	3.70629	3.18086	2.2703	1.18276	0.53783	0.208781	0.104396		347.8	3.07608	2.07545	1.26003	0.702317	0.323048	-0.04671	0.050292
	348.01	2.8707	2.08064	1.09921	0.454897	0.15096	0.130111	0.075803		348	3.70616	3.18062	2.27006	1.18243	0.53824	0.208899	0.104749		348	3.07512	2.0741	1.25907	0.701756	0.322688	-0.04657	0.050764
	348.21	2.87049	2.0806	1.09853	0.454047	0.150494	0.129658	0.075404		348.2	3.70663	3.18019	2.27033	1.18254	0.538647	0.208367	0.105131		348.2	3.07437	2.07328	1.25818	0.701282	0.322079	-0.04658	0.050888
	348.41	2.87016	2.08062	1.09826	0.45414	0.150311	0.129834	0.074944		348.4	3.70663	3.18018	2.27044	1.1825	0.538701	0.208239	0.105162		348.4	3.07391	2.07315	1.25773	0.701315	0.322518	-0.04573	0.051352
	348.61	2.87099	2.08048	1.09847	0.454109	0.150395	0.129868	0.075039		348.6	3.70716	3.18095	2.27135	1.18325	0.539545	0.208685	0.106135		348.6	3.07337	2.07243	1.25734	0.70094	0.322448	-0.0457	0.051618
	348.81	2.87126	2.08048	1.09831	0.45431	0.150151	0.129374	0.074607		348.8	3.70704	3.18105	2.27131	1.1836	0.540131	0.208382	0.106422		348.8	3.07213	2.07148	1.25624	0.700378	0.322095	-0.04618	0.051424
	349.01	2.87122	2.08003	1.09828	0.453971	0.150188	0.129065	0.074439		349	3.70751	3.18112	2.27144	1.18406	0.540668	0.20869	0.107039		349	3.07158	2.07069	1.25538	0.700199	0.321984	-0.04638	0.0516
	349.21	2.87161	2.07973	1.09862	0.454433	0.15032	0.128927	0.07485		349.2	3.70769	3.18113	2.27168	1.18424	0.540658	0.209022	0.107651		349.2	3.07147	2.0702	1.25449	0.700344	0.322357	-0.04606	0.051934
	349.41	2.87136	2.07932	1.09839	0.453783	0.150009	0.128408	0.074765		349.4	3.70772	3.18132	2.27161	1.18457	0.540519	0.209085	0.107275		349.4	3.07082	2.06997	1.25423	0.700271	0.322579	-0.0461	0.052184
	349.61	2.8709	2.0791	1.09863	0.453491	0.149813	0.128171	0.07528		349.6	3.70766	3.18164	2.27171	1.18473	0.540486	0.208995	0.107113		349.6	3.07099	2.07005	1.25361	0.699949	0.32298	-0.04548	0.05238
	349.81	2.87091	2.07927	1.09852	0.453622	0.15001	0.128277	0.075266		349.8	3.70696	3.18135	2.27148	1.18443	0.540396	0.208084	0.106727		349.8	3.07063	2.06939	1.25297	0.699404	0.32292	-0.04566	0.051792
	350.01	2.87115	2.07952	1.09896	0.453644	0.150031	0.128375	0.076191		350	3.70665	3.18134	2.27183	1.18433	0.540315	0.207986	0.106106		350	3.06948	2.06853	1.25234	0.698865	0.322697	-0.04556	0.050972
	350.21	2.87043	2.07879	1.09908	0.453335	0.150003	0.128227	0.075972		350.2	3.70623	3.18135	2.27201	1.18427	0.539877	0.207609	0.105738		350.2	3.06874	2.06761	1.25118	0.69821	0.322276	-0.04627	0.049946
	350.41	2.87006	2.07853	1.09935	0.453394	0.150402	0.128208	0.076318		350.4	3.70566	3.1811	2.27146	1.18383	0.539471	0.207234	0.105373		350.4	3.06761	2.06604	1.25004	0.697106	0.321314	-0.04711	0.049199
	350.61	2.8704	2.07902	1.09954	0.453652	0.150876	0.128788	0.077		350.6	3.70555	3.18166	2.27145	1.18366	0.539244	0.207032	0.105122		350.6	3.06661	2.06464	1.24844	0.69591	0.320303	-0.04794	0.048484
	350.81	2.87057	2.07927	1.09988	0.453909	0.151185	0.128964	0.076908		350.8	3.70603	3.18205	2.27182	1.18452	0.539805	0.207735	0.105379		350.8	3.06569	2.06328	1.24705	0.694787	0.319644	-0.04855	0.048127
	351.01	2.87038	2.07908	1.09926	0.453639	0.150367	0.129383	0.076437		351	3.70531	3.18128	2.27096	1.18381	0.539588	0.207571	0.104834		351	3.06507	2.06217	1.24605	0.694456	0.319293	-0.04873	0.047821
	351.21	2.87011	2.07916	1.0989	0.45349	0.149773	0.129505	0.076125		351.2	3.70468	3.18085	2.27063	1.1833	0.539061	0.207504	0.104321		351.2	3.06437	2.06109	1.24488	0.694105	0.319293	-0.04908	0.048453
	351.41	2.86986	2.07869	1.09907	0.453281	0.149795	0.129483	0.075631		351.4	3.70445	3.1804	2.27045	1.18234	0.538505	0.207263	0.103336		351.4	3.06351	2.05914	1.24352	0.693117	0.318561	-0.04999	0.047987
	351.61	2.8699	2.07904	1.09898	0.453462	0.150208	0.129762	0.075354		351.6	3.70322	3.17986	2.26935	1.18136	0.538094	0.206758	0.10294		351.6	3.06259	2.05741	1.24235	0.692551	0.318214	-0.05081	0.047761
	351.81	2.8695	2.07921	1.09874	0.453189	0.150815	0.129537	0.075123		351.8	3.70343	3.1799	2.26961	1.18115	0.538706	0.206828	0.102785		351.8	3.06225	2.05639	1.24155	0.692262	0.318142	-0.05049	0.047797
	352.01	2.86961	2.07949	1.09833	0.45304	0.150917	0.129419	0.075146		352	3.70327	3.17978	2.26923	1.18053	0.538957	0.206466	0.103349		352	3.06136	2.05544	1.2408	0.691461	0.318111	-0.05046	0.047641
	352.21	2.86931	2.07968	1.09782	0.452895	0.150486	0.129509	0.074827		352.2	3.70311	3.17894	2.26903	1.17985	0.538364	0.205893	0.102992		352.2	3.06067	2.05473	1.24029	0.691405	0.317747	-0.05036	0.047157
	352.41	2.86952	2.07961	1.09793	0.453366	0.1509	0.129572	0.074951		352.4	3.70274	3.17884	2.26881	1.17953	0.538237	0.206336	0.102424		352.4	3.06021	2.05436	1.24027	0.690897	0.317931	-0.05043	0.047223
	352.61	2.87013	2.07966	1.09818	0.453664	0.151037	0.129023	0.074997		352.6	3.70353	3.17923	2.26918	1.17951	0.538546	0.207238	0.103421		352.6	3.05906	2.05349	1.23913	0.690164	0.317819	-0.05099	0.047202
	352.81	2.87017	2.07939	1.09836	0.453593	0.150771	0.128514	0.074594		352.8	3.70327	3.17853	2.26872	1.17897	0.538148	0.206877	0.103244		352.8	3.05834	2.05289	1.23843	0.690102	0.317747	-0.051	0.047357
	353.01	2.8695	2.07902	1.0983	0.452959	0.151035	0.128193	0.074714		353	3.70335	3.17808	2.26873	1.17859	0.538286	0.207158	0.103493		353	3.05739	2.05204	1.23745	0.689407	0.317252	-0.05101	0.047371
	353.21	2.86978	2.0794	1.09912	0.453841	0.151785	0.12855	0.075337		353.2	3.7032	3.1784	2.26915	1.17904	0.538078	0.207253	0.103649		353.2	3.05629	2.05197	1.2363	0.688861	0.317086	-0.05086	0.047591
	353.41	2.86964	2.07951	1.0995	0.453728	0.152339	0.128748	0.075528		353.4	3.7028	3.17805	2.26861	1.1794	0.537781	0.206943	0.103263		353.4	3.05581	2.05155	1.23538	0.688703	0.316657	-0.05092	0.048087
	353.61	2.86991	2.07992	1.0999	0.454354	0.152536	0.128891	0.075849		353.6	3.70329	3.17781	2.2685	1.17961	0.537621	0.206664	0.103044		353.6	3.05519	2.05084	1.23426	0.688036	0.316087	-0.05103	0.047767
	353.81	2.87053	2.08041	1.10055	0.454745	0.152563	0.128839	0.07609		353.8	3.70329	3.17788	2.26873	1.18018	0.537679	0.20653	0.103234		353.8	3.05423	2.04994	1.23347	0.687505	0.315918	-0.05115	0.047679
	354.01	2.86988	2.08045	1.10022	0.454169	0.152231	0.128787	0.076431		354	3.70339	3.17833	2.2694	1.18069	0.537622	0.2072	0.103796		354	3.05358	2.04937	1.23286	0.687449	0.315621	-0.05118	0.047673
	354.21	2.86866	2.08009	1.09973	0.45335	0.152163	0.128788	0.076839		354.2	3.70383	3.17896	2.26974	1.18159	0.537742	0.207852	0.104995		354.2	3.05275	2.04823	1.23151	0.686635	0.315085	-0.05196	0.047613
	354.41	2.86909	2.08047	1.09974	0.453759	0.152366	0.12876	0.076952		354.4	3.70395	3.17935	2.26984	1.18206	0.537854	0.208009	0.105247		354.4	3.05192	2.04786	1.23131	0.686255	0.314658	-0.05168	0.047999
	354.61	2.86918	2.08051	1.09961	0.453803	0.152075	0.128883	0.077098		354.6	3.70414	3.17953	2.27036	1.18266	0.537906	0.208105	0.105174		354.6	3.05124	2.04717	1.23042	0.685785	0.314443	-0.05166	0.047924
	354.81	2.86891	2.08006	1.09881	0.454152	0.151692	0.128892	0.077108		354.8	3.70421	3.17963	2.27061	1.18319	0.537679	0.208619	0.105345		354.8	3.05063	2.04631	1.2297	0.685208	0.314001	-0.052	0.048535
	355.01	2.86874	2.07953	1.09803	0.45386	0.151161	0.128592	0.07717		355	3.70375	3.17965	2.27094	1.18325	0.537378	0.208294	0.105259		355	3.05056	2.04596	1.22961	0.685178	0.314175	-0.0518	0.048519
	355.21	2.86879	2.07938	1.0978	0.454152	0.151301	0.128452	0.076806		355.2	3.70336	3.17976	2.27132	1.18292	0.537369	0.208152	0.105402		355.2	3.05023	2.04563	1.2291	0.684879	0.314293	-0.05205	0.048938
	355.41	2.86821	2.07839	1.09682	0.453789	0.150935	0.128322	0.076043		355.4	3.70289	3.17942	2.27133	1.18253	0.537495	0.207504	0.105295		355.4	3.05037	2.04493	1.22851	0.684205	0.314533	-0.05222	0.048796
	355.61	2.86802	2.07781	1.09626	0.453467	0.150558	0.127892	0.075595		355.6	3.7023	3.17877	2.2711	1.18196	0.537049	0.207059	0.104825		355.6	3.04937	2.0442	1.22784	0.683547	0.31451	-0.05201	0.048433
	355.81	2.86768	2.07731	1.09585	0.452917	0.15026	0.127739	0.075352		355.8	3.70298	3.17915	2.27208	1.1827	0.537298	0.207511	0.105194		355.8	3.04927	2.04349	1.22815	0.683115	0.314645	-0.05153	0.048362
	356.01	2.86793	2.07736	1.09575	0.452791	0.149785	0.127679	0.074846		356	3.70219	3.17813	2.27123	1.18183	0.536588	0.206973	0.104651		356	3.04907	2.04294	1.22801	0.682469	0.314906	-0.0513	0.048749
	356.21	2.86759	2.07716	1.09552	0.452593	0.149483	0.127771	0.074139		356.2	3.70209	3.1779	2.27097	1.18164	0.536027	0.207238	0.10455		356.2	3.0488	2.04271	1.22784	0.682209	0.314981	-0.05038	0.048915
	356.41	2.8677	2.07683	1.09535	0.452296	0.14964	0.127523	0.073519		356.4	3.70225	3.1777	2.27086	1.18129	0.536571	0.208137	0.105074		356.4	3.04808	2.04173	1.227	0.681186	0.314982	-0.05061	0.048823
	356.61	2.86746	2.07634	1.09565	0.451971	0.149309	0.127513	0.072586		356.6	3.70246	3.17732	2.27102	1.1808	0.536872	0.208344	0.105377		356.6	3.04746	2.04109	1.22548	0.680201	0.314879	-0.051	0.049191
	356.81	2.86734	2.07614	1.0963	0.451694	0.149653	0.127757	0.072322		356.8	3.70244	3.17709	2.27087	1.18083	0.537457	0.208217	0.105324		356.8	3.04698	2.04039	1.2249	0.679955	0.314936	-0.05093	0.049453
	357.01	2.86751	2.07633	1.09724	0.452006	0.15033	0.128205	0.072421		357	3.70265	3.17712	2.27086	1.18136	0.538143	0.208555	0.105646		357	3.0463	2.03983	1.22445	0.679481	0.31491	-0.05065	0.049875
	357.21	2.86829	2.07655	1.09793	0.452565	0.150746	0.128422	0.072747		357.2	3.70251	3.17752	2.27103	1.18183	0.538567	0.209101	0.106056		357.2	3.04497	2.03907	1.2225	0.678825	0.314261	-0.05111	0.050152
	357.41	2.86883	2.07668	1.09823	0.452601	0.150755	0.127844	0.072347		357.4	3.70288	3.17688	2.27082	1.18167	0.53885	0.209122	0.105789		357.4	3.04454	2.0383	1.22144	0.678565	0.313987	-0.05118	0.050289
	357.61	2.86967	2.07732	1.09874	0.45291	0.150655	0.127748	0.072571		357.6	3.70312	3.17648	2.27064	1.1817	0.539339	0.209009	0.105858		357.6	3.04313	2.03695	1.22039	0.677592	0.312791	-0.05174	0.049726
	357.81	2.8694	2.07732	1.09866	0.452471	0.150376	0.127282	0.072814		357.8	3.70359	3.17747	2.27146	1.18257	0.540375	0.20966	0.106377		357.8	3.0421	2.03615	1.21987	0.677179	0.312588	-0.05176	0.050416
	358.01	2.86866	2.07734	1.09837	0.452102	0.150053	0.126885	0.072608		358	3.70361	3.17759	2.27094	1.18239	0.540276	0.20948	0.106358		358	3.04171	2.036	1.21939	0.677475	0.312496	-0.05159	0.050586
	358.21	2.86911	2.07776	1.09873	0.452399	0.15061	0.127117	0.073375		358.2	3.70378	3.17767	2.27069	1.18236	0.540253	0.209774	0.106377		358.2	3.04134	2.03515	1.21865	0.677234	0.311621	-0.05166	0.050647
	358.41	2.86927	2.07811	1.09846	0.452778	0.150654	0.126995	0.073521		358.4	3.70349	3.17745	2.27071	1.18202	0.539985	0.209241	0.105623		358.4	3.04069	2.03467	1.21838	0.677045	0.311391	-0.05139	0.050319
	358.61	2.86883	2.07775	1.0985	0.452915	0.150453	0.126899	0.073638		358.6	3.70293	3.17713	2.27021	1.18149	0.539669	0.208652	0.105046		358.6	3.03939	2.03351	1.21723	0.676191	0.310581	-0.05234	0.04945
	358.81	2.86831	2.07723	1.0977	0.452701	0.149939	0.126747	0.073885		358.8	3.70291	3.17689	2.26991	1.18096	0.539509	0.20851	0.10494		358.8	3.03851	2.03324	1.21642	0.675474	0.310236	-0.053	0.049566
	359.01	2.86823	2.07717	1.09773	0.45255	0.150049	0.126964	0.074691		359	3.70276	3.17717	2.27029	1.18067	0.539444	0.208262	0.10436		359	3.03739	2.03278	1.21541	0.674819	0.310148	-0.05339	0.049247
	359.21	2.86746	2.07624	1.09761	0.452449	0.149312	0.126991	0.074011		359.2	3.7024	3.17709	2.2702	1.18014	0.539189	0.208174	0.104181		359.2	3.03636	2.03215	1.21415	0.67441	0.309447	-0.0536	0.049122
	359.41	2.86714	2.07618	1.09739	0.452529	0.148991	0.126847	0.073926		359.4	3.70177	3.1768	2.26979	1.17999	0.538575	0.207955	0.103618		359.4	3.03589	2.03146	1.21337	0.674474	0.309727	-0.05335	0.049468
	359.61	2.86653	2.07616	1.09712	0.452178	0.148771	0.12645	0.074024		359.6	3.70159	3.17655	2.26987	1.17999	0.53819	0.207835	0.103516		359.6	3.03449	2.02999	1.21209	0.673876	0.30903	-0.05391	0.048824
	359.81	2.86644	2.07631	1.09714	0.452288	0.148383	0.12685	0.074207		359.8	3.70181	3.17733	2.2703	1.18109	0.538755	0.208524	0.104284		359.8	3.03489	2.02973	1.21212	0.674175	0.309566	-0.05334	0.048892
	360.01	2.86618	2.07649	1.0971	0.452431	0.14875	0.126711	0.074423		360	3.70153	3.17674	2.26974	1.18135	0.53846	0.208416	0.104418		360	3.03396	2.02895	1.21134	0.673487	0.309272	-0.05378	0.048539
	360.21	2.86527	2.07601	1.09649	0.452049	0.148637	0.126792	0.074432		360.2	3.70187	3.17741	2.27049	1.18244	0.538875	0.209343	0.105201		360.2	3.03349	2.02823	1.21027	0.672806	0.308817	-0.05368	0.048384
	360.41	2.86487	2.07567	1.09677	0.451624	0.148663	0.126593	0.073834		360.4	3.70187	3.17734	2.27053	1.18234	0.539252	0.210085	0.105877		360.4	3.03341	2.02732	1.20897	0.672405	0.308852	-0.05412	0.048506
	360.61	2.86463	2.07508	1.09713	0.451785	0.14915	0.126558	0.07378		360.6	3.70223	3.17749	2.27059	1.18275	0.539216	0.210233	0.105801		360.6	3.03312	2.02661	1.20816	0.671772	0.308714	-0.05408	0.048803
	360.81	2.86481	2.07582	1.09745	0.451909	0.149798	0.127198	0.074212		360.8	3.70233	3.17813	2.27075	1.18352	0.539514	0.210891	0.106174		360.8	3.03218	2.02578	1.20707	0.671639	0.3086	-0.05363	0.049028
	361.01	2.86552	2.076	1.09762	0.452165	0.150292	0.127056	0.073882		361	3.70201	3.1781	2.27099	1.18395	0.53958	0.211106	0.106702		361	3.03161	2.02513	1.20649	0.671539	0.308403	-0.05332	0.049294
	361.21	2.86626	2.0765	1.09755	0.452512	0.15079	0.127387	0.073926		361.2	3.70166	3.1775	2.27082	1.18396	0.539498	0.211213	0.10645		361.2	3.03054	2.02383	1.20472	0.670059	0.307618	-0.05389	0.048515
	361.41	2.86644	2.07705	1.09749	0.452563	0.151062	0.127597	0.073828		361.4	3.70193	3.17655	2.2707	1.18353	0.538932	0.210674	0.105494		361.4	3.03017	2.02295	1.20413	0.669458	0.307517	-0.05349	0.048692
	361.61	2.86678	2.07738	1.09756	0.453186	0.151913	0.128415	0.074477		361.6	3.70198	3.17639	2.27073	1.18387	0.539171	0.210578	0.105847		361.6	3.02958	2.02205	1.20339	0.668421	0.306723	-0.05346	0.048542
	361.81	2.86654	2.07731	1.09755	0.453006	0.151948	0.12835	0.07403		361.8	3.70225	3.17617	2.27028	1.18365	0.538909	0.210357	0.105869		361.8	3.02952	2.02144	1.20309	0.667716	0.306913	-0.0531	0.048723
	362.01	2.86651	2.07758	1.09778	0.453375	0.152048	0.128302	0.073846		362	3.70179	3.17545	2.26979	1.18293	0.538061	0.209564	0.105349		362	3.02984	2.02125	1.20252	0.667246	0.306953	-0.05241	0.048578
	362.21	2.86679	2.0775	1.09752	0.453568	0.152513	0.128191	0.07396		362.2	3.70166	3.17483	2.26985	1.1822	0.537943	0.209307	0.105551		362.2	3.02945	2.02039	1.2021	0.666418	0.306507	-0.05257	0.048344
	362.41	2.86661	2.07739	1.09753	0.453759	0.152317	0.128129	0.073838		362.4	3.70178	3.17466	2.27	1.18165	0.538093	0.209079	0.105776		362.4	3.0288	2.0201	1.20151	0.665623	0.306791	-0.0527	0.048157
	362.61	2.86664	2.0772	1.09779	0.454228	0.152562	0.128007	0.074293		362.6	3.70191	3.17411	2.27001	1.18124	0.538215	0.208563	0.105403		362.6	3.02798	2.01964	1.20043	0.664596	0.306849	-0.05311	0.048591
	362.81	2.86626	2.07692	1.09715	0.453788	0.152358	0.127711	0.074513		362.8	3.70219	3.17442	2.27034	1.18107	0.538222	0.208918	0.105972		362.8	3.02783	2.01993	1.19986	0.664114	0.307138	-0.05281	0.049136
	363.01	2.86666	2.07708	1.09801	0.454004	0.152853	0.127728	0.075361		363	3.70199	3.17432	2.27025	1.18088	0.538063	0.208815	0.105692		363	3.02648	2.01869	1.19901	0.663589	0.306746	-0.05331	0.048568
	363.21	2.86602	2.07694	1.09764	0.454003	0.152395	0.126661	0.074727		363.2	3.70191	3.174	2.27026	1.18092	0.537992	0.208792	0.105159		363.2	3.02584	2.01783	1.19848	0.663143	0.306486	-0.05337	0.048881
	363.41	2.86617	2.07719	1.09772	0.454099	0.152519	0.126291	0.074645		363.4	3.70152	3.17327	2.2696	1.18043	0.537733	0.208051	0.104667		363.4	3.02549	2.01721	1.19802	0.663691	0.307054	-0.05358	0.049258
	363.61	2.86611	2.07706	1.0982	0.454118	0.152295	0.126087	0.07486		363.6	3.70147	3.17309	2.26943	1.18072	0.538091	0.207774	0.104882		363.6	3.02478	2.01649	1.19779	0.663477	0.306979	-0.05391	0.048836
	363.81	2.86611	2.07651	1.09847	0.453902	0.152312	0.125867	0.074841		363.8	3.70147	3.17323	2.26928	1.18093	0.538232	0.208122	0.104879		363.8	3.02375	2.01586	1.19727	0.663339	0.306761	-0.0546	0.048207
	364.01	2.86631	2.07619	1.0989	0.453422	0.152541	0.125612	0.07451		364	3.70112	3.17306	2.26884	1.18088	0.537804	0.208011	0.104608		364	3.0225	2.01491	1.19656	0.662951	0.30654	-0.05512	0.047926
	364.21	2.86535	2.07521	1.09828	0.452581	0.15195	0.124922	0.074127		364.2	3.7009	3.17369	2.26906	1.18068	0.538183	0.208603	0.104918		364.2	3.02182	2.0146	1.196	0.662424	0.306219	-0.05521	0.047908
	364.41	2.86463	2.07494	1.09825	0.452115	0.152116	0.124348	0.073487		364.4	3.70102	3.17361	2.26864	1.18004	0.538305	0.208635	0.104823		364.4	3.02091	2.01322	1.19496	0.66189	0.305666	-0.05548	0.047378
	364.61	2.86523	2.07538	1.09859	0.45222	0.152336	0.124921	0.073397		364.6	3.70094	3.1742	2.26882	1.18026	0.538563	0.208462	0.104317		364.6	3.01951	2.01201	1.19405	0.661055	0.304984	-0.05571	0.046956
	364.81	2.86461	2.0756	1.09824	0.451686	0.152011	0.124911	0.073113		364.8	3.70028	3.17422	2.26856	1.18018	0.538503	0.208495	0.103484		364.8	3.0179	2.01072	1.19304	0.660061	0.304331	-0.05649	0.046054
	365.01	2.86406	2.07535	1.09778	0.451205	0.151881	0.12468	0.072327		365	3.69981	3.17364	2.26861	1.17955	0.538112	0.207798	0.102639		365	3.01733	2.00998	1.19305	0.660151	0.304585	-0.05659	0.045897
	365.21	2.86407	2.07589	1.09796	0.45131	0.151521	0.125224	0.072112		365.2	3.69932	3.17309	2.26821	1.17895	0.537237	0.207752	0.101944		365.2	3.01688	2.00892	1.19233	0.659536	0.30473	-0.05674	0.04557
	365.41	2.86359	2.07559	1.0975	0.450873	0.15123	0.125223	0.0724		365.4	3.69986	3.17311	2.26811	1.17872	0.537263	0.208101	0.102028		365.4	3.01618	2.0082	1.19175	0.659076	0.304478	-0.05636	0.046064
	365.61	2.8634	2.07515	1.09762	0.450862	0.151244	0.125341	0.07231		365.6	3.69973	3.17278	2.26785	1.17861	0.53711	0.207815	0.102343		365.6	3.01538	2.00786	1.19093	0.658221	0.304209	-0.05611	0.045853
	365.81	2.86354	2.07511	1.09824	0.450699	0.15127	0.125647	0.072202		365.8	3.69994	3.1733	2.26733	1.1781	0.537035	0.207793	0.102304		365.8	3.01484	2.00733	1.19069	0.657749	0.304105	-0.05607	0.04611
	366.01	2.86327	2.07486	1.0978	0.450394	0.150658	0.125271	0.072784		366	3.69992	3.17363	2.26746	1.17827	0.536979	0.207927	0.102826		366	3.01472	2.00731	1.19028	0.657821	0.303805	-0.05573	0.046408
	366.21	2.86351	2.07426	1.09745	0.450143	0.150194	0.125124	0.072633		366.2	3.70022	3.17337	2.26795	1.17833	0.537323	0.207592	0.103201		366.2	3.01395	2.00664	1.1895	0.6574	0.304079	-0.05588	0.04659
	366.41	2.86379	2.07428	1.09746	0.450518	0.150274	0.125086	0.072922		366.4	3.70037	3.17358	2.26802	1.1783	0.537304	0.207535	0.103359		366.4	3.01396	2.00627	1.18901	0.657354	0.304136	-0.05559	0.046332
	366.61	2.86364	2.07412	1.09737	0.450071	0.149819	0.124317	0.073086		366.6	3.70042	3.17321	2.26823	1.17857	0.53702	0.207376	0.103326		366.6	3.01365	2.00596	1.18856	0.657443	0.304142	-0.05534	0.047038
	366.81	2.86338	2.07381	1.09677	0.449653	0.149574	0.123967	0.072828		366.8	3.70082	3.17369	2.26836	1.17885	0.53685	0.207945	0.10406		366.8	3.01288	2.00527	1.18815	0.657203	0.303763	-0.05562	0.046551
	367.01	2.86376	2.07392	1.09725	0.450209	0.149701	0.124115	0.073231		367	3.70076	3.17278	2.26786	1.17848	0.536866	0.20795	0.103894		367	3.01284	2.00454	1.18787	0.657428	0.303716	-0.05576	0.046543
	367.21	2.86362	2.07398	1.09684	0.450265	0.149842	0.124277	0.073118		367.2	3.70025	3.17194	2.26746	1.17823	0.53636	0.207343	0.103748		367.2	3.01286	2.00497	1.18774	0.657557	0.303987	-0.05514	0.04768
	367.41	2.86359	2.0736	1.09687	0.450303	0.149714	0.124396	0.073087		367.4	3.70046	3.17184	2.26757	1.17839	0.536406	0.20715	0.103589		367.4	3.01215	2.00473	1.18664	0.657246	0.303703	-0.05538	0.048165
	367.61	2.86341	2.07346	1.09733	0.450518	0.149948	0.124264	0.073097		367.6	3.70051	3.17181	2.26766	1.17864	0.536433	0.207424	0.104547		367.6	3.01128	2.00434	1.18613	0.65677	0.30352	-0.05571	0.048336
	367.81	2.86329	2.0732	1.09712	0.450489	0.150044	0.12422	0.072879		367.8	3.70064	3.17209	2.26774	1.17893	0.536735	0.207783	0.104956		367.8	3.01029	2.00388	1.18489	0.656422	0.303169	-0.05632	0.048329
	368.01	2.86273	2.07274	1.09631	0.449907	0.149583	0.123693	0.072312		368	3.7007	3.17283	2.26799	1.17901	0.536899	0.207863	0.104819		368	3.00944	2.00319	1.18427	0.655709	0.30235	-0.05703	0.047981
	368.21	2.86185	2.07277	1.09579	0.450182	0.149745	0.123286	0.072395		368.2	3.70037	3.17242	2.26812	1.17848	0.537124	0.207747	0.105365		368.2	3.00883	2.0025	1.18369	0.655045	0.301285	-0.05774	0.047415
	368.41	2.86143	2.07341	1.09587	0.450421	0.149834	0.123075	0.072262		368.4	3.70037	3.17224	2.2686	1.17831	0.537456	0.207587	0.105304		368.4	3.00776	2.00074	1.18231	0.653684	0.300208	-0.05883	0.046943
	368.61	2.86098	2.07349	1.09566	0.450524	0.14944	0.123101	0.072288		368.6	3.7	3.1727	2.26909	1.1786	0.537529	0.207774	0.104774		368.6	3.00698	1.99985	1.18147	0.652919	0.299642	-0.05977	0.046811
	368.81	2.86075	2.07397	1.09579	0.450757	0.150048	0.123143	0.072934		368.8	3.69951	3.17254	2.26912	1.17857	0.537281	0.207737	0.104525		368.8	3.00618	1.99904	1.18118	0.652322	0.29955	-0.06051	0.046671
	369.01	2.86071	2.07423	1.09579	0.450928	0.150478	0.123223	0.07309		369	3.69934	3.17263	2.2692	1.17831	0.537076	0.207904	0.104319		369	3.00612	1.99882	1.1812	0.652242	0.299508	-0.06044	0.047039
	369.21	2.86072	2.0747	1.09593	0.450817	0.150525	0.123148	0.073523		369.2	3.69929	3.17243	2.26854	1.17841	0.53672	0.208136	0.104417		369.2	3.00587	1.99829	1.18027	0.651824	0.299347	-0.06041	0.047711
	369.41	2.86106	2.07504	1.09678	0.451005	0.150768	0.123406	0.074182		369.4	3.69975	3.17311	2.26802	1.17885	0.537252	0.208618	0.105344		369.4	3.00521	1.99765	1.17971	0.651046	0.298643	-0.06009	0.047824
	369.61	2.86104	2.07535	1.09661	0.450875	0.150935	0.123531	0.074155		369.6	3.69993	3.17325	2.26794	1.17914	0.537226	0.208579	0.105234		369.6	3.00454	1.99725	1.1789	0.650358	0.29817	-0.06039	0.047476
	369.81	2.86105	2.07558	1.09645	0.450678	0.151114	0.123884	0.074458		369.8	3.69967	3.17391	2.26732	1.17898	0.537157	0.208672	0.104715		369.8	3.00396	1.99696	1.17826	0.650116	0.297727	-0.06058	0.047922
	370.01	2.86156	2.07532	1.09636	0.450417	0.150837	0.123512	0.073689		370	3.69923	3.17385	2.26696	1.17939	0.53736	0.209009	0.105176		370	3.00423	1.99646	1.17791	0.64995	0.297752	-0.06018	0.047709
	370.21	2.86181	2.07521	1.09621	0.450434	0.150889	0.123233	0.072956		370.2	3.69924	3.17386	2.26719	1.17945	0.537895	0.208557	0.104647		370.2	3.00346	1.99561	1.1767	0.649026	0.297938	-0.05993	0.047289
	370.41	2.86237	2.07558	1.0968	0.450513	0.151529	0.123766	0.073292		370.4	3.69878	3.17363	2.26674	1.17922	0.537594	0.208738	0.104685		370.4	3.00339	1.99558	1.17662	0.649434	0.297903	-0.05946	0.047654
	370.61	2.86266	2.0757	1.09705	0.450148	0.151237	0.123652	0.073524		370.6	3.69896	3.17374	2.26692	1.17934	0.53802	0.209709	0.105272		370.6	3.00305	1.99544	1.17663	0.649374	0.297995	-0.05915	0.047865
	370.81	2.86265	2.07559	1.09655	0.450106	0.151475	0.124201	0.073943		370.8	3.69855	3.17329	2.26633	1.17892	0.537861	0.209522	0.104801		370.8	3.00236	1.99464	1.17562	0.648971	0.298032	-0.05915	0.04723
	371.01	2.86328	2.07556	1.09708	0.45062	0.151235	0.12499	0.074182		371	3.69807	3.17274	2.2663	1.17881	0.538505	0.209618	0.104713		371	3.00213	1.9944	1.17504	0.648772	0.298455	-0.05886	0.047391
	371.21	2.86318	2.07556	1.09723	0.450811	0.151491	0.125267	0.073955		371.2	3.69764	3.17234	2.26638	1.17911	0.538514	0.209367	0.10427		371.2	3.00118	1.99428	1.17442	0.648306	0.299066	-0.05837	0.047705
	371.41	2.86308	2.07525	1.09755	0.450979	0.151325	0.125488	0.073915		371.4	3.69815	3.17213	2.26691	1.17953	0.538893	0.209232	0.104038		371.4	3.00027	1.99291	1.1733	0.647608	0.29869	-0.05871	0.047042
	371.61	2.86329	2.075	1.09831	0.451612	0.151871	0.125743	0.073692		371.6	3.69807	3.17174	2.26719	1.17933	0.538889	0.209528	0.1043		371.6	2.9998	1.99179	1.17311	0.647491	0.299062	-0.05848	0.046325
	371.81	2.86301	2.07464	1.09828	0.452054	0.151467	0.125962	0.073601		371.8	3.69814	3.17141	2.26722	1.17931	0.538909	0.209613	0.103712		371.8	2.99891	1.99121	1.1722	0.647232	0.298749	-0.05917	0.045919
	372.01	2.86258	2.07426	1.09778	0.451776	0.151042	0.125781	0.073385		372	3.69763	3.17098	2.26731	1.1789	0.538869	0.209586	0.103791		372	2.9979	1.98993	1.17139	0.646423	0.298262	-0.06005	0.045286
	372.21	2.86241	2.07437	1.09768	0.452399	0.151103	0.125817	0.073146		372.2	3.69746	3.17041	2.26799	1.17895	0.539169	0.209524	0.103719		372.2	2.99779	1.98874	1.17109	0.646033	0.298493	-0.05976	0.045079
	372.41	2.86221	2.07459	1.09778	0.452444	0.150822	0.126009	0.073331		372.4	3.69726	3.17046	2.26808	1.17873	0.539835	0.209679	0.103828		372.4	2.99693	1.98778	1.17047	0.645277	0.298177	-0.06009	0.045273
	372.61	2.86239	2.07411	1.0978	0.452848	0.151187	0.126869	0.074166		372.6	3.69774	3.17063	2.26892	1.17912	0.540082	0.209622	0.103769		372.6	2.99647	1.98702	1.16997	0.64503	0.297917	-0.06007	0.0454
	372.81	2.86282	2.07427	1.09803	0.45313	0.152194	0.127093	0.074666		372.8	3.69762	3.17049	2.2693	1.17932	0.539951	0.209321	0.103753		372.8	2.9959	1.98623	1.16942	0.644525	0.298031	-0.06026	0.045147
	373.01	2.86223	2.07354	1.09773	0.453177	0.151732	0.12646	0.07374		373	3.69743	3.17001	2.26857	1.17896	0.539771	0.208879	0.103724		373	2.99552	1.98538	1.16889	0.643967	0.297675	-0.06015	0.045455
	373.21	2.86189	2.07345	1.09722	0.452973	0.151221	0.126187	0.073129		373.2	3.69789	3.17017	2.26872	1.17924	0.539645	0.208717	0.103965		373.2	2.99486	1.98451	1.16756	0.643757	0.297144	-0.0605	0.045401
	373.41	2.86129	2.07299	1.09624	0.452668	0.150732	0.12522	0.071919		373.4	3.69819	3.1709	2.26902	1.17971	0.53969	0.209282	0.10457		373.4	2.99452	1.98401	1.16701	0.643277	0.296885	-0.06038	0.045426
	373.61	2.86097	2.07267	1.09537	0.452436	0.151232	0.124709	0.070915		373.6	3.69797	3.17108	2.26874	1.17965	0.539669	0.209313	0.104757		373.6	2.99396	1.98339	1.16649	0.642727	0.296419	-0.06051	0.04529
	373.81	2.85998	2.07178	1.09457	0.451675	0.150829	0.123532	0.070136		373.8	3.69741	3.17125	2.26855	1.17953	0.539516	0.209587	0.104352		373.8	2.99304	1.98299	1.16568	0.642162	0.295761	-0.06077	0.045536
	374.01	2.8602	2.07139	1.09451	0.451288	0.15106	0.123099	0.069438		374	3.69737	3.17159	2.26887	1.1794	0.539399	0.210062	0.104755		374	2.99331	1.9829	1.16575	0.642042	0.295885	-0.06014	0.045742
	374.21	2.86061	2.07172	1.09499	0.450871	0.151001	0.122781	0.069761		374.2	3.69796	3.17213	2.26958	1.17944	0.539753	0.210262	0.105287		374.2	2.99318	1.98335	1.16576	0.641612	0.295808	-0.05962	0.046253
	374.41	2.86061	2.07187	1.09467	0.450229	0.151089	0.122644	0.070513		374.4	3.69782	3.17202	2.26998	1.17935	0.539109	0.210764	0.105172		374.4	2.99256	1.98344	1.16535	0.641707	0.295381	-0.05958	0.046441
	374.61	2.86067	2.07153	1.09442	0.44983	0.150841	0.122056	0.070182		374.6	3.69784	3.17261	2.27003	1.17979	0.539356	0.211374	0.105572		374.6	2.99217	1.98305	1.16511	0.641662	0.295415	-0.05888	0.046784
	374.81	2.86093	2.07148	1.09477	0.450068	0.150887	0.122536	0.070077		374.8	3.69737	3.17261	2.26977	1.17995	0.539118	0.211171	0.105177		374.8	2.99167	1.98247	1.16446	0.641536	0.294866	-0.05891	0.046933
	375.01	2.86118	2.07147	1.09508	0.450186	0.151208	0.123008	0.070797		375	3.69806	3.1734	2.2707	1.18088	0.539637	0.212234	0.10623		375	2.99118	1.9821	1.16381	0.6411	0.294635	-0.05903	0.046958
	375.21	2.86151	2.07167	1.09555	0.450646	0.152303	0.123202	0.071789		375.2	3.69821	3.17341	2.27093	1.18123	0.539138	0.212197	0.106689		375.2	2.9912	1.98189	1.16341	0.640835	0.294423	-0.05892	0.046884
	375.41	2.86205	2.0718	1.09608	0.450847	0.152835	0.123207	0.072496		375.4	3.69833	3.17237	2.27076	1.18076	0.53852	0.211765	0.106758		375.4	2.99083	1.98127	1.16326	0.640676	0.293745	-0.05921	0.046253
	375.61	2.86258	2.07224	1.09668	0.450812	0.153534	0.12335	0.072809		375.6	3.6984	3.17176	2.27055	1.18009	0.538233	0.211165	0.105784		375.6	2.98993	1.98096	1.16237	0.639792	0.294061	-0.05961	0.046556
	375.81	2.86239	2.07213	1.09707	0.450789	0.153303	0.12351	0.072933		375.8	3.69889	3.17141	2.2707	1.18052	0.53873	0.2109	0.106383		375.8	2.98939	1.98093	1.16177	0.639502	0.294031	-0.06008	0.047079
	376.01	2.86253	2.07234	1.09693	0.450332	0.153416	0.123278	0.073175		376	3.6986	3.17084	2.27032	1.18033	0.538771	0.210564	0.106211		376	2.9896	1.98041	1.16164	0.639256	0.294244	-0.05959	0.046999
	376.21	2.8627	2.07224	1.09681	0.450419	0.15341	0.123647	0.073466		376.2	3.69888	3.17069	2.27038	1.18027	0.539478	0.209774	0.105784		376.2	2.98841	1.9794	1.16077	0.638433	0.293697	-0.05977	0.046519
	376.41	2.86329	2.07275	1.09769	0.451056	0.153665	0.124474	0.074192		376.4	3.69915	3.17058	2.27027	1.18044	0.540154	0.209698	0.106358		376.4	2.98761	1.97852	1.15946	0.637783	0.292943	-0.06021	0.046179
	376.61	2.86356	2.0724	1.09757	0.451361	0.154325	0.124621	0.074769		376.6	3.69923	3.17004	2.26992	1.18053	0.540152	0.208492	0.106036		376.6	2.98701	1.97772	1.15855	0.637194	0.292834	-0.06067	0.045916
	376.81	2.86312	2.07262	1.09729	0.450957	0.154237	0.124589	0.074321		376.8	3.69863	3.16982	2.26941	1.18025	0.540212	0.208005	0.106239		376.8	2.98646	1.9766	1.15744	0.636268	0.292841	-0.06126	0.045414
	377.01	2.86275	2.07298	1.09747	0.450965	0.153882	0.124497	0.073576		377	3.69866	3.16961	2.26888	1.18017	0.540006	0.207369	0.106244		377	2.98554	1.97583	1.15626	0.635284	0.292204	-0.06125	0.045197
	377.21	2.8617	2.07286	1.0971	0.450087	0.153393	0.123988	0.073151		377.2	3.69879	3.16906	2.26878	1.18002	0.539643	0.207057	0.105629		377.2	2.98499	1.97557	1.1558	0.635045	0.291835	-0.06108	0.044884
	377.41	2.86091	2.07296	1.09734	0.449319	0.153597	0.12393	0.072543		377.4	3.69845	3.16869	2.26829	1.17983	0.539038	0.20733	0.105538		377.4	2.98454	1.97477	1.15556	0.634495	0.291975	-0.06052	0.045554
	377.61	2.86049	2.07345	1.09791	0.449447	0.15389	0.124378	0.072974		377.6	3.69859	3.16891	2.26845	1.17981	0.539136	0.207208	0.105103		377.6	2.98343	1.97364	1.15489	0.634096	0.291319	-0.06068	0.04478
	377.81	2.85981	2.07379	1.098	0.448794	0.153246	0.124144	0.072995		377.8	3.69804	3.1687	2.26851	1.17988	0.538909	0.207635	0.104509		377.8	2.98304	1.97298	1.15453	0.633388	0.290892	-0.06083	0.04462
	378.01	2.86051	2.07458	1.099	0.44901	0.153437	0.125274	0.073695		378	3.69821	3.16912	2.26894	1.17939	0.538544	0.207648	0.104455		378	2.98311	1.97273	1.15444	0.63333	0.291015	-0.06031	0.044639
	378.21	2.86032	2.07492	1.0991	0.448642	0.153099	0.124754	0.073805		378.2	3.69855	3.16949	2.26956	1.18003	0.53889	0.207888	0.104465		378.2	2.98236	1.97194	1.1538	0.632659	0.290629	-0.06046	0.044695
	378.41	2.86032	2.07543	1.09863	0.448916	0.153131	0.125235	0.073897		378.4	3.69797	3.16927	2.26901	1.17997	0.538307	0.207985	0.104435		378.4	2.9815	1.97069	1.15314	0.632501	0.290187	-0.06064	0.04476
	378.61	2.8603	2.07536	1.09879	0.44894	0.152892	0.12543	0.073381		378.6	3.69817	3.16984	2.26904	1.18029	0.538323	0.208814	0.104647		378.6	2.98154	1.97008	1.15325	0.632659	0.290447	-0.06033	0.045569
	378.81	2.85971	2.07531	1.09878	0.448953	0.152638	0.125617	0.073663		378.8	3.69793	3.16945	2.26885	1.18	0.537809	0.209306	0.104662		378.8	2.98131	1.9691	1.15293	0.63222	0.290395	-0.06106	0.045393
	379.01	2.8596	2.0754	1.09888	0.448823	0.15275	0.12585	0.074244		379	3.69792	3.16969	2.26873	1.17983	0.537761	0.209873	0.105141		379	2.98074	1.96872	1.15227	0.631307	0.290437	-0.0614	0.045471
	379.21	2.85955	2.07506	1.09815	0.448807	0.152772	0.125288	0.074367		379.2	3.69762	3.1687	2.26817	1.17892	0.537145	0.20924	0.104487		379.2	2.98049	1.9685	1.15201	0.631566	0.290511	-0.06133	0.046275
	379.41	2.86	2.07505	1.09817	0.448701	0.152722	0.125018	0.074076		379.4	3.69698	3.16805	2.26726	1.17837	0.536819	0.208808	0.104368		379.4	2.97998	1.96811	1.15167	0.631487	0.290732	-0.06155	0.046449
	379.61	2.86042	2.07496	1.09808	0.448966	0.152647	0.12501	0.073788		379.6	3.69706	3.16784	2.26712	1.17816	0.537071	0.208325	0.103668		379.6	2.97969	1.96803	1.15114	0.631472	0.291217	-0.06134	0.046929
	379.81	2.8599	2.07419	1.09718	0.449268	0.152359	0.124463	0.073696		379.8	3.69693	3.16751	2.26715	1.17866	0.53736	0.20899	0.104341		379.8	2.97996	1.96773	1.15142	0.631639	0.291751	-0.06087	0.04757
	380.01	2.8602	2.07349	1.0964	0.449349	0.152295	0.124535	0.073944		380	3.69611	3.16695	2.26638	1.17831	0.536794	0.208537	0.103992		380	2.97968	1.96675	1.15098	0.631232	0.291727	-0.0608	0.047162
	380.21	2.86001	2.07247	1.09606	0.449376	0.151925	0.123735	0.073528		380.2	3.69621	3.16718	2.26618	1.17859	0.537533	0.208801	0.103797		380.2	2.97854	1.96568	1.14987	0.630523	0.291268	-0.0612	0.046807
	380.41	2.85927	2.07173	1.09521	0.448949	0.151876	0.123017	0.073482		380.4	3.69606	3.16704	2.26668	1.17893	0.537895	0.20888	0.10357		380.4	2.97823	1.96507	1.14912	0.629914	0.290972	-0.06148	0.046471
	380.61	2.85891	2.07107	1.09515	0.448437	0.152099	0.122342	0.073358		380.6	3.69552	3.16684	2.266	1.17854	0.538007	0.20829	0.10349		380.6	2.97808	1.96491	1.14932	0.629882	0.2911	-0.06149	0.046729
	380.81	2.85839	2.07094	1.09511	0.447866	0.151697	0.12166	0.072466		380.8	3.69552	3.16633	2.26637	1.17862	0.537842	0.20835	0.103571		380.8	2.97752	1.96412	1.1484	0.628771	0.290829	-0.06132	0.046158
	381.01	2.85769	2.07066	1.09494	0.447628	0.151689	0.121212	0.072273		381	3.69594	3.16599	2.26682	1.1793	0.537901	0.208079	0.102874		381	2.97668	1.96334	1.14747	0.627962	0.290472	-0.0612	0.046024
	381.21	2.85714	2.07062	1.09509	0.447571	0.151276	0.121435	0.072516		381.2	3.69621	3.16569	2.26717	1.1796	0.538362	0.208489	0.10287		381.2	2.97661	1.9632	1.14759	0.627809	0.290531	-0.0611	0.046315
	381.41	2.85673	2.07065	1.09505	0.44754	0.151429	0.121366	0.072584		381.4	3.69656	3.16605	2.26749	1.17971	0.538409	0.208726	0.10271		381.4	2.97574	1.96231	1.14667	0.626991	0.290199	-0.06144	0.046134
	381.61	2.85642	2.07065	1.09462	0.447618	0.151512	0.121057	0.072893		381.6	3.69652	3.16632	2.26852	1.18016	0.539139	0.208171	0.102578		381.6	2.97491	1.96174	1.14596	0.626542	0.289741	-0.06134	0.045342
	381.81	2.85652	2.07098	1.09488	0.447926	0.151645	0.120992	0.072789		381.8	3.69572	3.16564	2.26853	1.17985	0.538876	0.207498	0.102694		381.8	2.97451	1.96122	1.14525	0.625624	0.28928	-0.06143	0.045016
	382.01	2.85668	2.07103	1.09491	0.447826	0.151462	0.12119	0.073177		382	3.69582	3.16567	2.26896	1.17941	0.539056	0.207111	0.102549		382	2.97323	1.96094	1.14417	0.625166	0.289159	-0.062	0.044718
	382.21	2.85688	2.07188	1.09525	0.448131	0.152007	0.121227	0.072996		382.2	3.69608	3.16575	2.26954	1.18002	0.539305	0.206811	0.102551		382.2	2.97245	1.96029	1.14347	0.62443	0.288604	-0.06242	0.044765
	382.41	2.85737	2.07249	1.0959	0.448586	0.152132	0.121423	0.072765		382.4	3.69624	3.16608	2.26963	1.17986	0.53917	0.207031	0.103046		382.4	2.97158	1.9594	1.14268	0.624079	0.288228	-0.06304	0.044636
	382.61	2.85677	2.07241	1.09614	0.44816	0.151901	0.121691	0.072257		382.6	3.69583	3.16592	2.26919	1.17926	0.539092	0.206993	0.102338		382.6	2.97035	1.95855	1.14155	0.622879	0.287847	-0.06397	0.043927
	382.81	2.85666	2.07264	1.09655	0.448235	0.151905	0.122354	0.072113		382.8	3.69577	3.16616	2.2688	1.17923	0.539434	0.206894	0.102509		382.8	2.96899	1.95785	1.14059	0.622379	0.287915	-0.06435	0.044008
	383.01	2.85705	2.07252	1.09656	0.44818	0.151858	0.122343	0.07189		383	3.69557	3.16622	2.26831	1.17866	0.539543	0.206624	0.102361		383	2.96845	1.95755	1.13983	0.622171	0.28764	-0.06414	0.04409
	383.21	2.85716	2.07213	1.09623	0.448099	0.151487	0.122718	0.071705		383.2	3.6954	3.16629	2.26771	1.17844	0.539387	0.206386	0.103059		383.2	2.96846	1.95735	1.13944	0.622843	0.287179	-0.06391	0.044603
	383.41	2.85716	2.07212	1.09608	0.448346	0.151217	0.12294	0.071686		383.4	3.69557	3.167	2.26748	1.17881	0.53947	0.206771	0.103636		383.4	2.96823	1.95745	1.13884	0.622665	0.28665	-0.06417	0.04448
	383.61	2.85714	2.07176	1.09591	0.44848	0.15092	0.123215	0.071059		383.6	3.69558	3.16697	2.26721	1.17838	0.539608	0.206783	0.103688		383.6	2.96808	1.95704	1.13903	0.622952	0.286647	-0.06387	0.044615
	383.81	2.85704	2.07127	1.09564	0.448151	0.151235	0.123782	0.07103		383.8	3.69498	3.16663	2.26682	1.17861	0.539316	0.207407	0.104186		383.8	2.96775	1.9562	1.13844	0.622006	0.286435	-0.06406	0.044588
	384.01	2.85746	2.07108	1.09563	0.447923	0.151687	0.123915	0.071245		384	3.695	3.16685	2.26684	1.1787	0.53929	0.207583	0.104086		384	2.96755	1.9555	1.13766	0.621824	0.286443	-0.06372	0.044484
	384.21	2.85698	2.0711	1.09545	0.447267	0.151738	0.123267	0.07099		384.2	3.69542	3.16723	2.26682	1.17875	0.539522	0.208099	0.104412		384.2	2.96714	1.95521	1.13731	0.621682	0.286356	-0.06349	0.044601
	384.41	2.85649	2.071	1.09525	0.446934	0.151887	0.122919	0.070781		384.4	3.69546	3.16768	2.2667	1.17866	0.539342	0.208347	0.104257		384.4	2.9667	1.95459	1.13707	0.621585	0.285849	-0.06375	0.0448
	384.61	2.85632	2.07118	1.09516	0.447063	0.151787	0.122446	0.070866		384.6	3.69591	3.16761	2.26651	1.17843	0.539268	0.208728	0.104271		384.6	2.96693	1.95395	1.13682	0.621812	0.286192	-0.06337	0.045553
	384.81	2.85611	2.07094	1.09469	0.446983	0.151268	0.122193	0.070537		384.8	3.69615	3.16704	2.26673	1.17868	0.539028	0.208831	0.104171		384.8	2.96638	1.9533	1.13594	0.620668	0.285901	-0.06348	0.045099
	385.01	2.85525	2.07013	1.09358	0.446446	0.150589	0.121473	0.070191		385	3.69655	3.16756	2.26722	1.17923	0.539547	0.209585	0.104732		385	2.96609	1.95282	1.13558	0.620622	0.286103	-0.06397	0.045659
	385.21	2.85503	2.07013	1.09354	0.446418	0.1502	0.121085	0.070643		385.2	3.69657	3.16735	2.26719	1.1789	0.539618	0.210019	0.10473		385.2	2.96552	1.95191	1.13528	0.619968	0.285697	-0.06456	0.045615
	385.41	2.85514	2.07016	1.09353	0.446303	0.150152	0.12041	0.07032		385.4	3.69612	3.16677	2.26704	1.17855	0.539381	0.210121	0.104923		385.4	2.96555	1.95155	1.13506	0.619812	0.285928	-0.06456	0.045479
	385.61	2.85487	2.07021	1.09295	0.445818	0.150011	0.120336	0.070273		385.6	3.69614	3.1666	2.26777	1.17877	0.539407	0.210375	0.104908		385.6	2.96493	1.9507	1.13467	0.619297	0.285958	-0.06446	0.04533
	385.81	2.85477	2.07048	1.09318	0.445646	0.149627	0.120353	0.07055		385.8	3.69564	3.16583	2.26769	1.1783	0.539216	0.210071	0.104649		385.8	2.96433	1.95015	1.1337	0.618953	0.285487	-0.06497	0.044844
	386.01	2.85517	2.07078	1.0941	0.445957	0.150042	0.12044	0.070884		386	3.6955	3.1658	2.26766	1.17804	0.539216	0.210488	0.104732		386	2.96383	1.95011	1.13343	0.619199	0.286012	-0.06479	0.045279
	386.21	2.85569	2.07147	1.09499	0.446996	0.150973	0.121072	0.070977		386.2	3.69591	3.16577	2.2682	1.17864	0.539521	0.210508	0.104608		386.2	2.96269	1.949	1.13281	0.618688	0.285427	-0.06522	0.044961
	386.41	2.85573	2.07089	1.09504	0.447154	0.150795	0.120681	0.070817		386.4	3.69571	3.16564	2.26819	1.17813	0.539522	0.210697	0.105107		386.4	2.96132	1.94813	1.13196	0.618167	0.285046	-0.06624	0.044853
	386.61	2.85574	2.07041	1.09527	0.447143	0.150837	0.121005	0.070487		386.6	3.69521	3.16543	2.2677	1.17761	0.539644	0.210513	0.104959		386.6	2.96098	1.9478	1.13175	0.617591	0.285293	-0.06631	0.044481
	386.81	2.85597	2.07018	1.0955	0.44691	0.150888	0.121013	0.070592		386.8	3.69525	3.16528	2.26826	1.17778	0.539839	0.210528	0.105237		386.8	2.9607	1.94735	1.13146	0.617757	0.285048	-0.06632	0.04447
	387.01	2.85618	2.07009	1.0951	0.446666	0.150876	0.120849	0.070914		387	3.69509	3.16504	2.26859	1.17766	0.540001	0.21057	0.105037		387	2.96047	1.94736	1.13086	0.617667	0.284822	-0.066	0.044355
	387.21	2.8564	2.07016	1.09532	0.4469	0.151231	0.121412	0.07139		387.2	3.69542	3.16537	2.26854	1.17787	0.539963	0.210844	0.105522		387.2	2.96022	1.94722	1.13075	0.61738	0.28421	-0.06599	0.044218
	387.41	2.85575	2.06966	1.09477	0.446593	0.151009	0.12124	0.070988		387.4	3.69607	3.16554	2.26875	1.17828	0.540307	0.211038	0.105133		387.4	2.95967	1.94712	1.13035	0.616908	0.283929	-0.0661	0.043852
	387.61	2.85593	2.06936	1.09486	0.446846	0.15123	0.121609	0.070427		387.6	3.69608	3.16579	2.26911	1.17829	0.540675	0.210684	0.105356		387.6	2.95947	1.94667	1.13013	0.616306	0.284252	-0.06578	0.044044
	387.81	2.85662	2.06979	1.09516	0.447592	0.15231	0.121845	0.07079		387.8	3.69608	3.16578	2.26905	1.17873	0.540647	0.21056	0.105264		387.8	2.95889	1.94651	1.12943	0.615104	0.283796	-0.06602	0.043438
	388.01	2.85693	2.07037	1.09538	0.447957	0.152817	0.121684	0.071134		388	3.69635	3.16595	2.26872	1.17872	0.540804	0.210298	0.105266		388	2.95795	1.9462	1.12834	0.614703	0.283898	-0.06539	0.043746
	388.21	2.85634	2.07016	1.09506	0.447546	0.152786	0.121196	0.070493		388.2	3.69646	3.1661	2.26835	1.17851	0.5402	0.210119	0.105039		388.2	2.95716	1.94559	1.12817	0.614122	0.283355	-0.06536	0.043661
	388.41	2.85589	2.0697	1.09489	0.447159	0.152487	0.120271	0.07027		388.4	3.69651	3.16645	2.26844	1.17864	0.539857	0.210261	0.104172		388.4	2.95659	1.94513	1.12767	0.613859	0.282655	-0.06547	0.043911
	388.61	2.85542	2.06949	1.09456	0.446829	0.152366	0.120478	0.070572		388.6	3.69683	3.16628	2.26869	1.17866	0.540017	0.210287	0.104089		388.6	2.95539	1.94447	1.1263	0.612734	0.282147	-0.06602	0.044085
	388.81	2.85551	2.06919	1.09447	0.446675	0.152178	0.120478	0.07004		388.8	3.69685	3.1663	2.26859	1.17911	0.540123	0.210137	0.103846		388.8	2.95468	1.94425	1.12611	0.612187	0.281478	-0.06642	0.043522
	389.01	2.85518	2.06929	1.09445	0.446275	0.151838	0.120063	0.069777		389	3.69673	3.16617	2.26783	1.17885	0.540001	0.210244	0.103915		389	2.95451	1.94365	1.12559	0.612325	0.281442	-0.06675	0.043429
	389.21	2.85522	2.06963	1.09479	0.44603	0.151251	0.120413	0.069877		389.2	3.69633	3.16631	2.26735	1.17876	0.539946	0.21032	0.1039		389.2	2.95359	1.94227	1.1247	0.611728	0.281066	-0.06686	0.043469
	389.41	2.85503	2.06996	1.09479	0.446097	0.151237	0.120594	0.069563		389.4	3.69582	3.16587	2.26712	1.17857	0.539414	0.210306	0.103677		389.4	2.95388	1.9422	1.12424	0.612191	0.281257	-0.06635	0.042981
	389.61	2.85439	2.0699	1.09473	0.445794	0.150754	0.120641	0.069608		389.6	3.69578	3.16565	2.26711	1.17844	0.539472	0.209982	0.103337		389.6	2.9533	1.94185	1.12402	0.612131	0.281311	-0.06606	0.043012
	389.81	2.85445	2.07028	1.09556	0.446257	0.150937	0.120774	0.069698		389.8	3.69518	3.16534	2.26691	1.17833	0.539539	0.209745	0.103769		389.8	2.95296	1.94172	1.12352	0.61244	0.281113	-0.06611	0.043314
	390.01	2.85435	2.07028	1.09553	0.446744	0.151512	0.120493	0.070065		390	3.69514	3.16531	2.26683	1.17846	0.539501	0.209695	0.104392		390	2.95282	1.94168	1.12347	0.612854	0.281653	-0.0659	0.043998
	390.21	2.85455	2.0703	1.09611	0.447384	0.151594	0.120894	0.07017		390.2	3.69516	3.16526	2.2671	1.17891	0.539912	0.209758	0.104583		390.2	2.95196	1.94091	1.12286	0.612629	0.28155	-0.0664	0.044297
	390.41	2.85397	2.06963	1.0955	0.446921	0.151227	0.120339	0.070533		390.4	3.69493	3.16511	2.26741	1.17867	0.539839	0.209857	0.105151		390.4	2.95157	1.94052	1.12235	0.612221	0.281348	-0.06638	0.044555
	390.61	2.85415	2.06984	1.09562	0.446879	0.151431	0.120675	0.071045		390.6	3.69482	3.1654	2.26808	1.17878	0.539756	0.210431	0.105764		390.6	2.95159	1.93993	1.12152	0.61194	0.280973	-0.06645	0.044287
	390.81	2.85442	2.07031	1.0955	0.447256	0.151607	0.121196	0.071445		390.8	3.69431	3.16485	2.26821	1.17879	0.539146	0.210377	0.105455		390.8	2.95158	1.93941	1.12115	0.611798	0.280876	-0.06631	0.044483
	391.01	2.85419	2.07019	1.09508	0.447428	0.151821	0.121391	0.072081		391	3.69446	3.16484	2.26812	1.17882	0.539174	0.210522	0.105064		391	2.95099	1.9391	1.12012	0.610911	0.281047	-0.06607	0.044788
	391.21	2.85387	2.06995	1.09533	0.447871	0.151739	0.121476	0.072033		391.2	3.6948	3.16492	2.26784	1.179	0.539134	0.210444	0.105755		391.2	2.9509	1.93832	1.11955	0.610319	0.281037	-0.06654	0.044828
	391.41	2.85337	2.06946	1.09507	0.447769	0.151123	0.121234	0.071304		391.4	3.69472	3.16492	2.26774	1.17909	0.539364	0.210778	0.105937		391.4	2.9501	1.93787	1.11895	0.609357	0.281269	-0.06701	0.04479
	391.61	2.85342	2.06915	1.095	0.448032	0.151301	0.121463	0.071243		391.6	3.69459	3.16502	2.26758	1.17832	0.538859	0.210589	0.105849		391.6	2.94932	1.93728	1.11785	0.608333	0.281004	-0.06752	0.044625
	391.81	2.85408	2.06923	1.09571	0.448575	0.151867	0.121635	0.071483		391.8	3.69498	3.16532	2.26743	1.17881	0.539147	0.210618	0.106331		391.8	2.94858	1.93699	1.1171	0.607948	0.28066	-0.06768	0.044489
	392.01	2.85434	2.06936	1.09585	0.448335	0.152102	0.121706	0.071467		392	3.69505	3.16539	2.26736	1.17906	0.539137	0.210853	0.106264		392	2.94809	1.93615	1.11594	0.607701	0.28051	-0.06716	0.044551
	392.21	2.8545	2.06906	1.09562	0.447896	0.152112	0.121423	0.071461		392.2	3.69521	3.16567	2.26773	1.17907	0.538729	0.210729	0.105819		392.2	2.94801	1.93601	1.11616	0.607817	0.280591	-0.06693	0.044884
[truncated: 2,551 more rows]
