# Supplementary material for: Asprosin-neutralizing antibodies as a treatment for metabolic syndrome
Source: eLife. 2021 Apr 27;10:e63784. doi: 10.7554/eLife.63784 (PMC8102062; doi:10.7554/eLife.63784)
Supplement: Figure 7—source data 1. [file elife-63784-fig7-data1.xlsx]

## Sheet: Sheet1
		Figure 7: AgRP neuronal activity and liver cAMP levels																		Statistical analysis
		AgRP firing				AgRP depolarization														Figure 7: AgRP neuronal activity and hepatic cAMP analysis
			rAsprosin + anti-Asprosin rabbit mAb				rAsprosin + anti-Asprosin rabbit mAb			cAMP (pmol/mg liver tissue)			cAMP (pmol/mg liver tissue)
		rAsprosin		rAsprosin after washout		rAsprosin		rAsprosin after washout		IgG control	mouse mAb		IgG control	Rabbit mAb	Human mAb					Rabbit anti-asprosin mAB								Human anti-asprosin mAB
										433.681	288.171		443.647	271.221	173.94					Delta firing of AgRP neurons								Delta firing of AgRP neurons
										433.681	330.992		292.635	190.36	256.144					Šídák's multiple comparisons test	Mean Diff.	95.00% CI of diff.	Below threshold?	Summary	Adjusted P Value			Šídák's multiple comparisons test	Mean Diff.	95.00% CI of diff.	Below threshold?	Summary	Adjusted P Value
		1.43	-0.07	1.1		3.64	-0.94	1.91		313.189	318.146		353.779	264.13	242.081					Column B vs. rAsprosin	-1.222	-1.817 to -0.6278	Yes	***	0.0004			Column B vs. rAsprosin	-0.83	-1.400 to -0.2596	Yes	**	0.0059
		1.55	0.04	1.72		5.83	0.86	4.25		370.761	286.529		340.65	184.192	258.395					Column B vs. rAsprosin after washout	-1.024	-1.619 to -0.4298	Yes	**	0.0017			Column B vs. rAsprosin after washout	-0.58	-1.150 to -0.009641	Yes	*	0.0462
		0.58	-0.21	0.41		3.26	1.01	5.25		351.557	256.878		409.296	235.908	253.917
		1.34	-0.052	1.02		2.87	1.46	5.02		324.486	256.878		387.698	267.647	251.713					Rabbit anti-asprosin mAB								Human anti-asprosin mAB
		1.05	0.13	0.71		3.29	0.59	3.26		376.948	289.837		403.252	195.955	237.944					Depolarization of AgRP neurons								Depolarization of AgRP neurons
										343.136	277.937		448.208	389.598	310.455					Šídák's multiple comparisons test	Mean Diff.	95.00% CI of diff.	Below threshold?	Summary	Adjusted P Value			Šídák's multiple comparisons test	Mean Diff.	95.00% CI of diff.	Below threshold?	Summary	Adjusted P Value
																				Column B vs. rAsprosin	-3.182	-5.074 to -1.290	Yes	**	0.0021			Column B vs. rAsprosin	-3.912	-5.987 to -1.837	Yes	***	0.0008
			rAsprosin + anti-Asprosin human mAb				rAsprosin + anti-Asprosin human mAb													Column B vs. rAsprosin after washout	-3.342	-5.234 to -1.450	Yes	**	0.0014			Column B vs. rAsprosin after washout	-4.164	-6.239 to -2.089	Yes	***	0.0005
		rAsprosin		rAsprosin after washout		rAsprosin		rAsprosin after washout
		1.67	0.07	0.56		3.03	1.01	3.92												Hepatic cAMP T-test			Hepatic cAMP T-test			Hepatic cAMP T-test
		0.41	0.13	0.43		4.32	0.64	3.44												mouse mAb			Rabbit mAb			Human mAb
		0.54	0.15	0.21		5.22	0.56	4.48												vs.			vs.			vs.
		0.85	0.02	1		3.63	0.24	5.46												IgG control			IgG control			IgG control
		0.98	-0.07	1		7.09	1.28	7.25
																				Unpaired t test			Unpaired t test			Unpaired t test
			rAsprosin + IgG control Ab				rAsprosin + IgG control Ab													P value	0.0007		P value	0.0005		P value	<0.0001
		rAsprosin				rAsprosin														P value summary	***		P value summary	***		P value summary	****
		0.71	0.21			5.56	5.37													Significantly different (P < 0.05)?	Yes		Significantly different (P < 0.05)?	Yes		Significantly different (P < 0.05)?	Yes
		1.58	1.18			2.45	2.09													One- or two-tailed P value?	Two-tailed		One- or two-tailed P value?	Two-tailed		One- or two-tailed P value?	Two-tailed
		1.21	0.75			3.2	5.13													t, df	t=4.323, df=14		t, df	t=4.461, df=14		t, df	t=5.953, df=14
		0.51	0.52			2.46	2.57
		1.56	1.22			2.97	2.77
		0.73	0.37			4.79	4.33
